# Supplementary material for: VirClust—A Tool for Hierarchical Clustering, Core Protein Detection and Annotation of (Prokaryotic) Viruses
Source: MDPI journal article supplement (doi:10.3390/v15041007), 2023-04-19
Supplement: s1 [file s1]

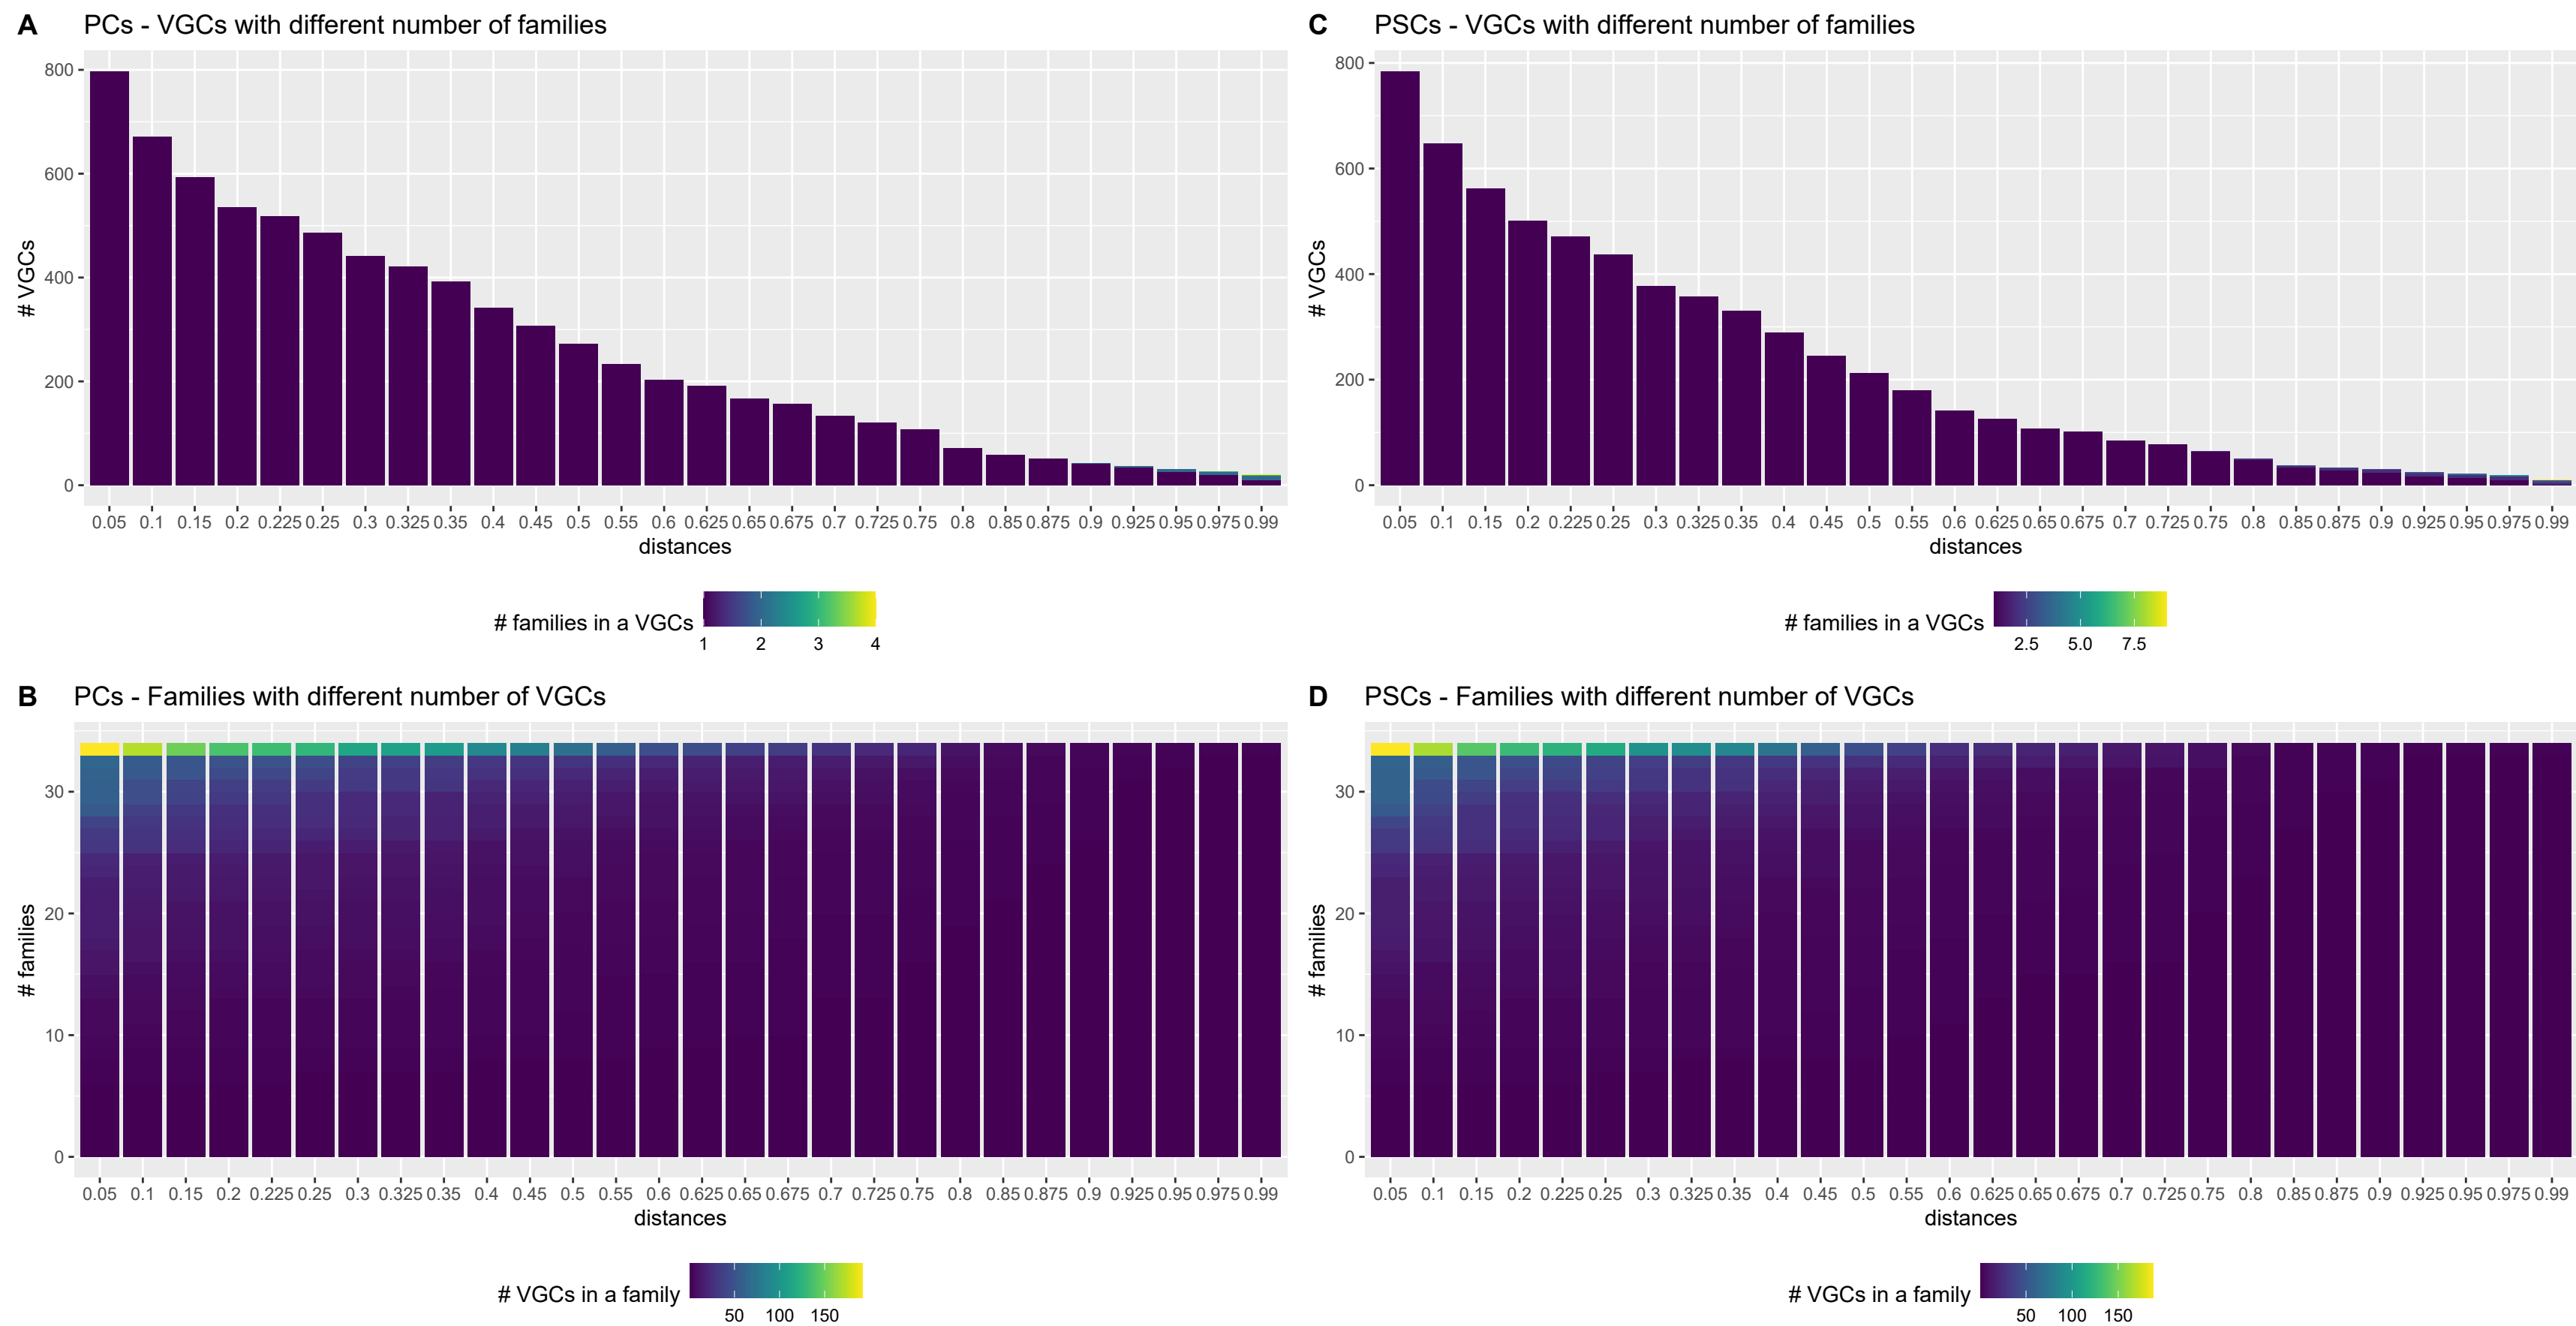

Fig. S1: Relationship between the number of VGCs and families for *Duplodnaviria*, when the PC- and PSC-based genomic trees of the Fam\_DB dataset were cut with different intergenomic distances.

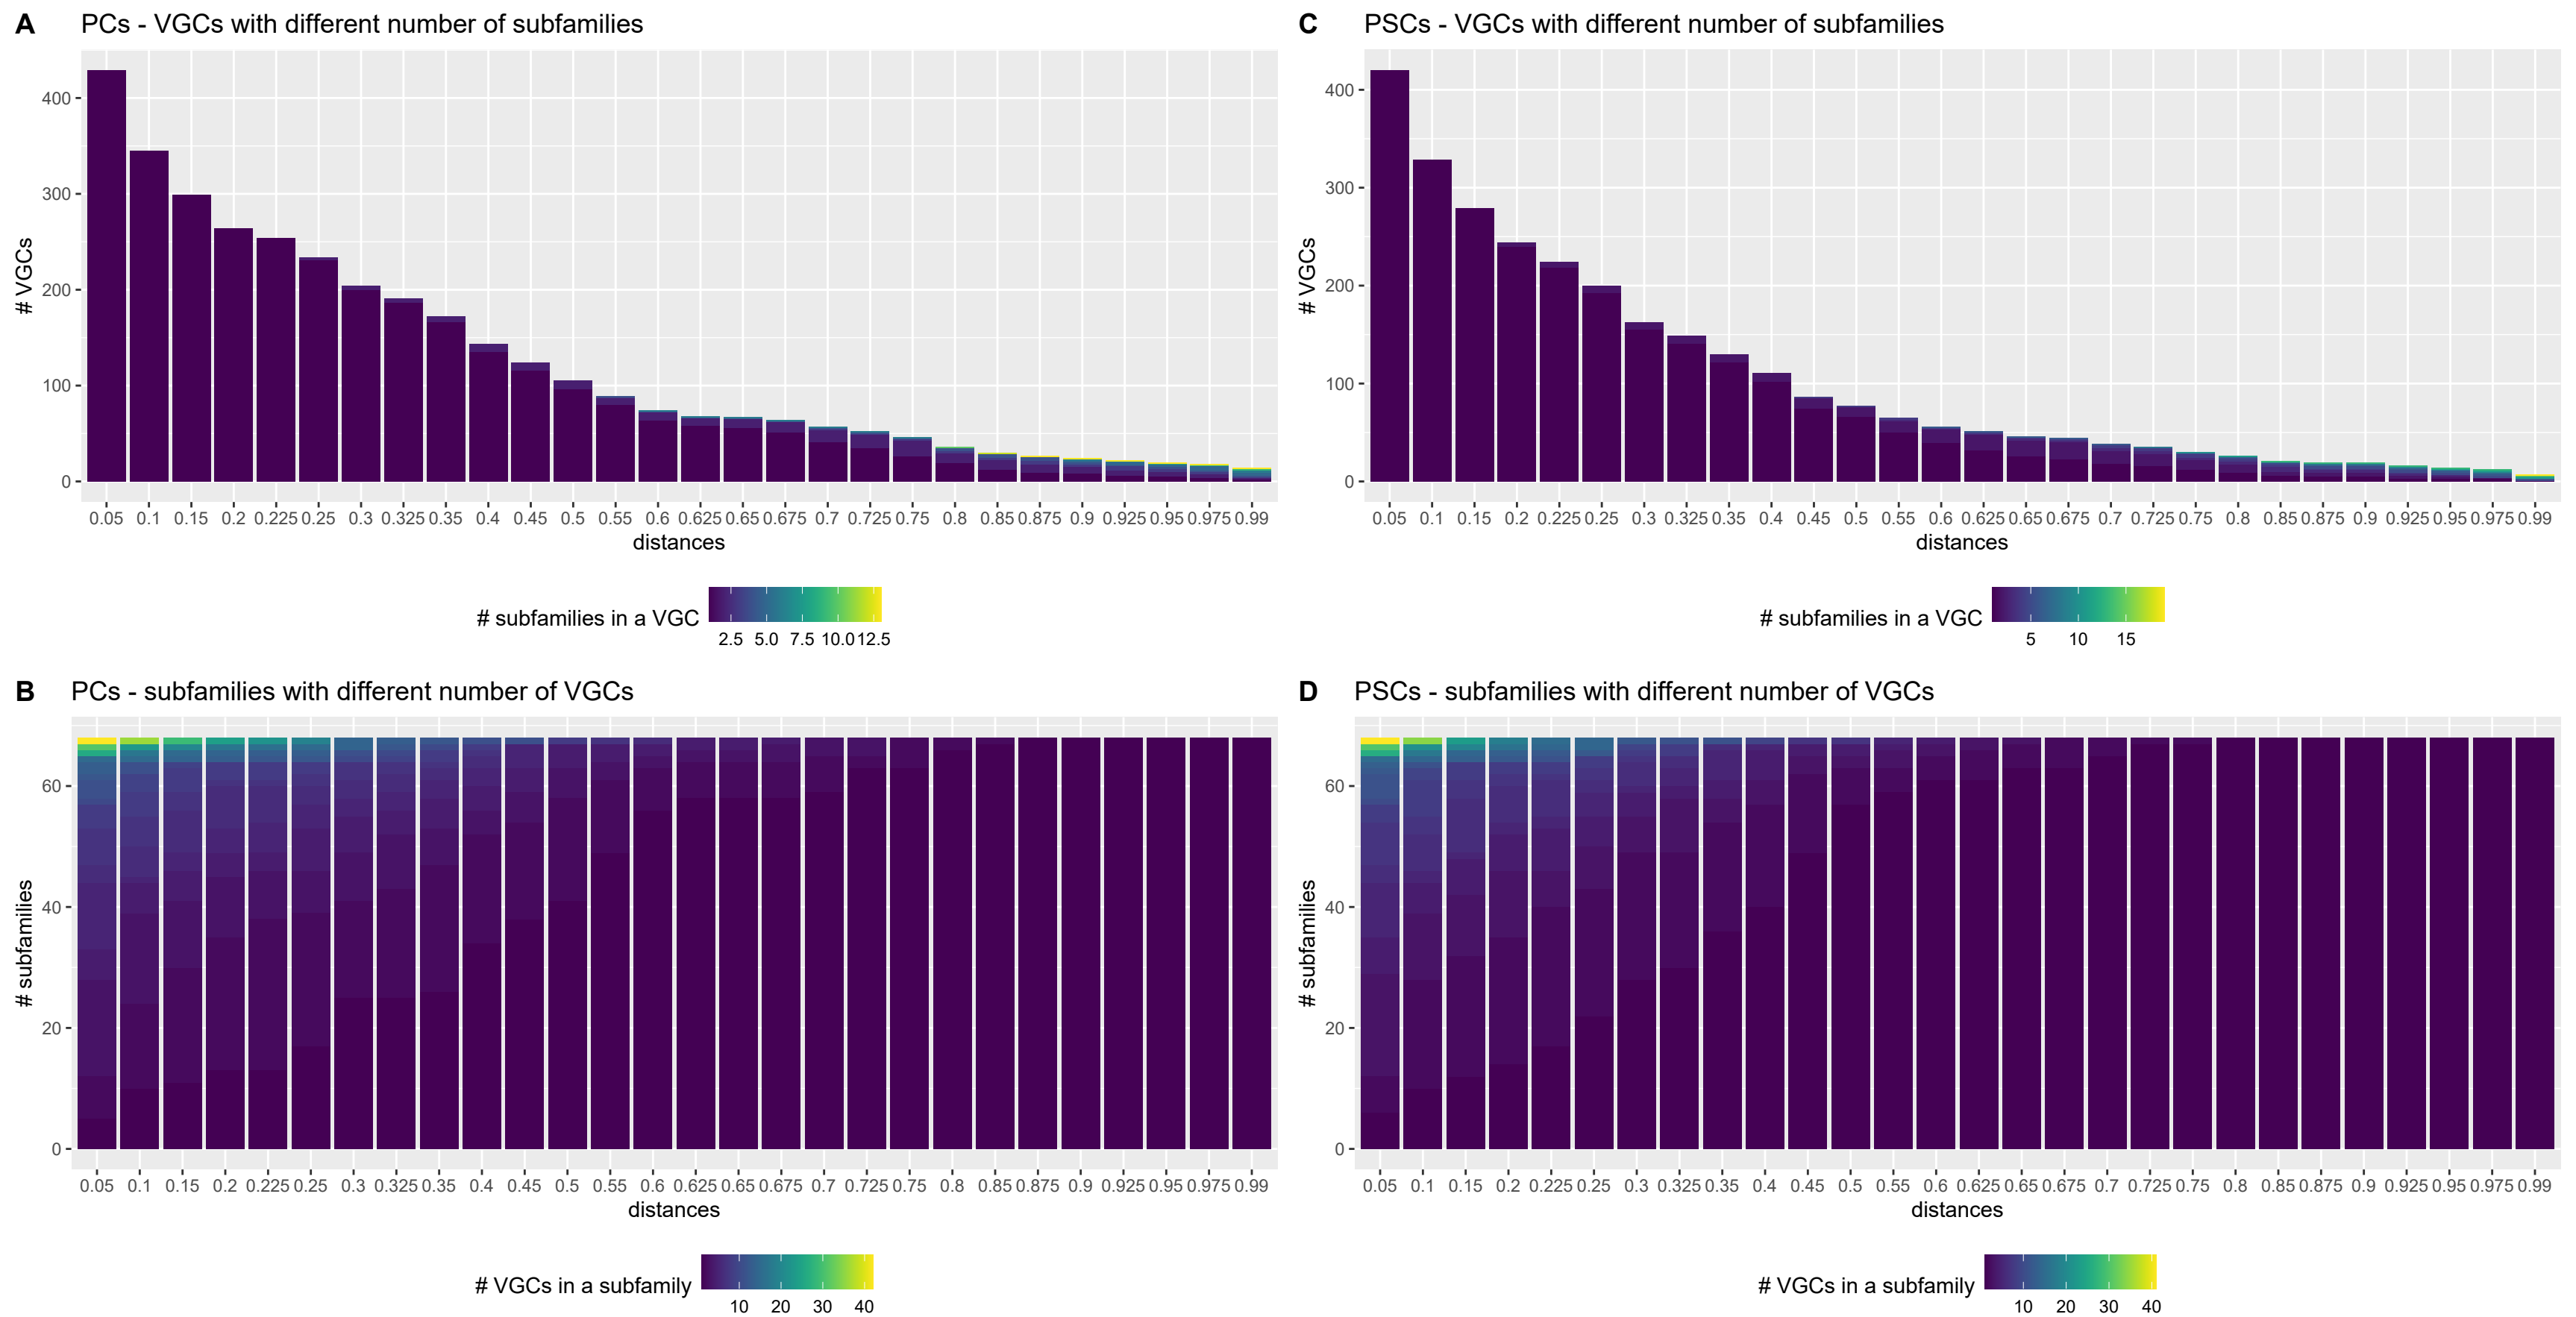

Fig. S2: Relationship between the number of VGCs and subfamilies for *Duplodnaviria*, when the PC- and PSC-based genomic trees of the Fam\_DB dataset were cut with different intergenomic distances.

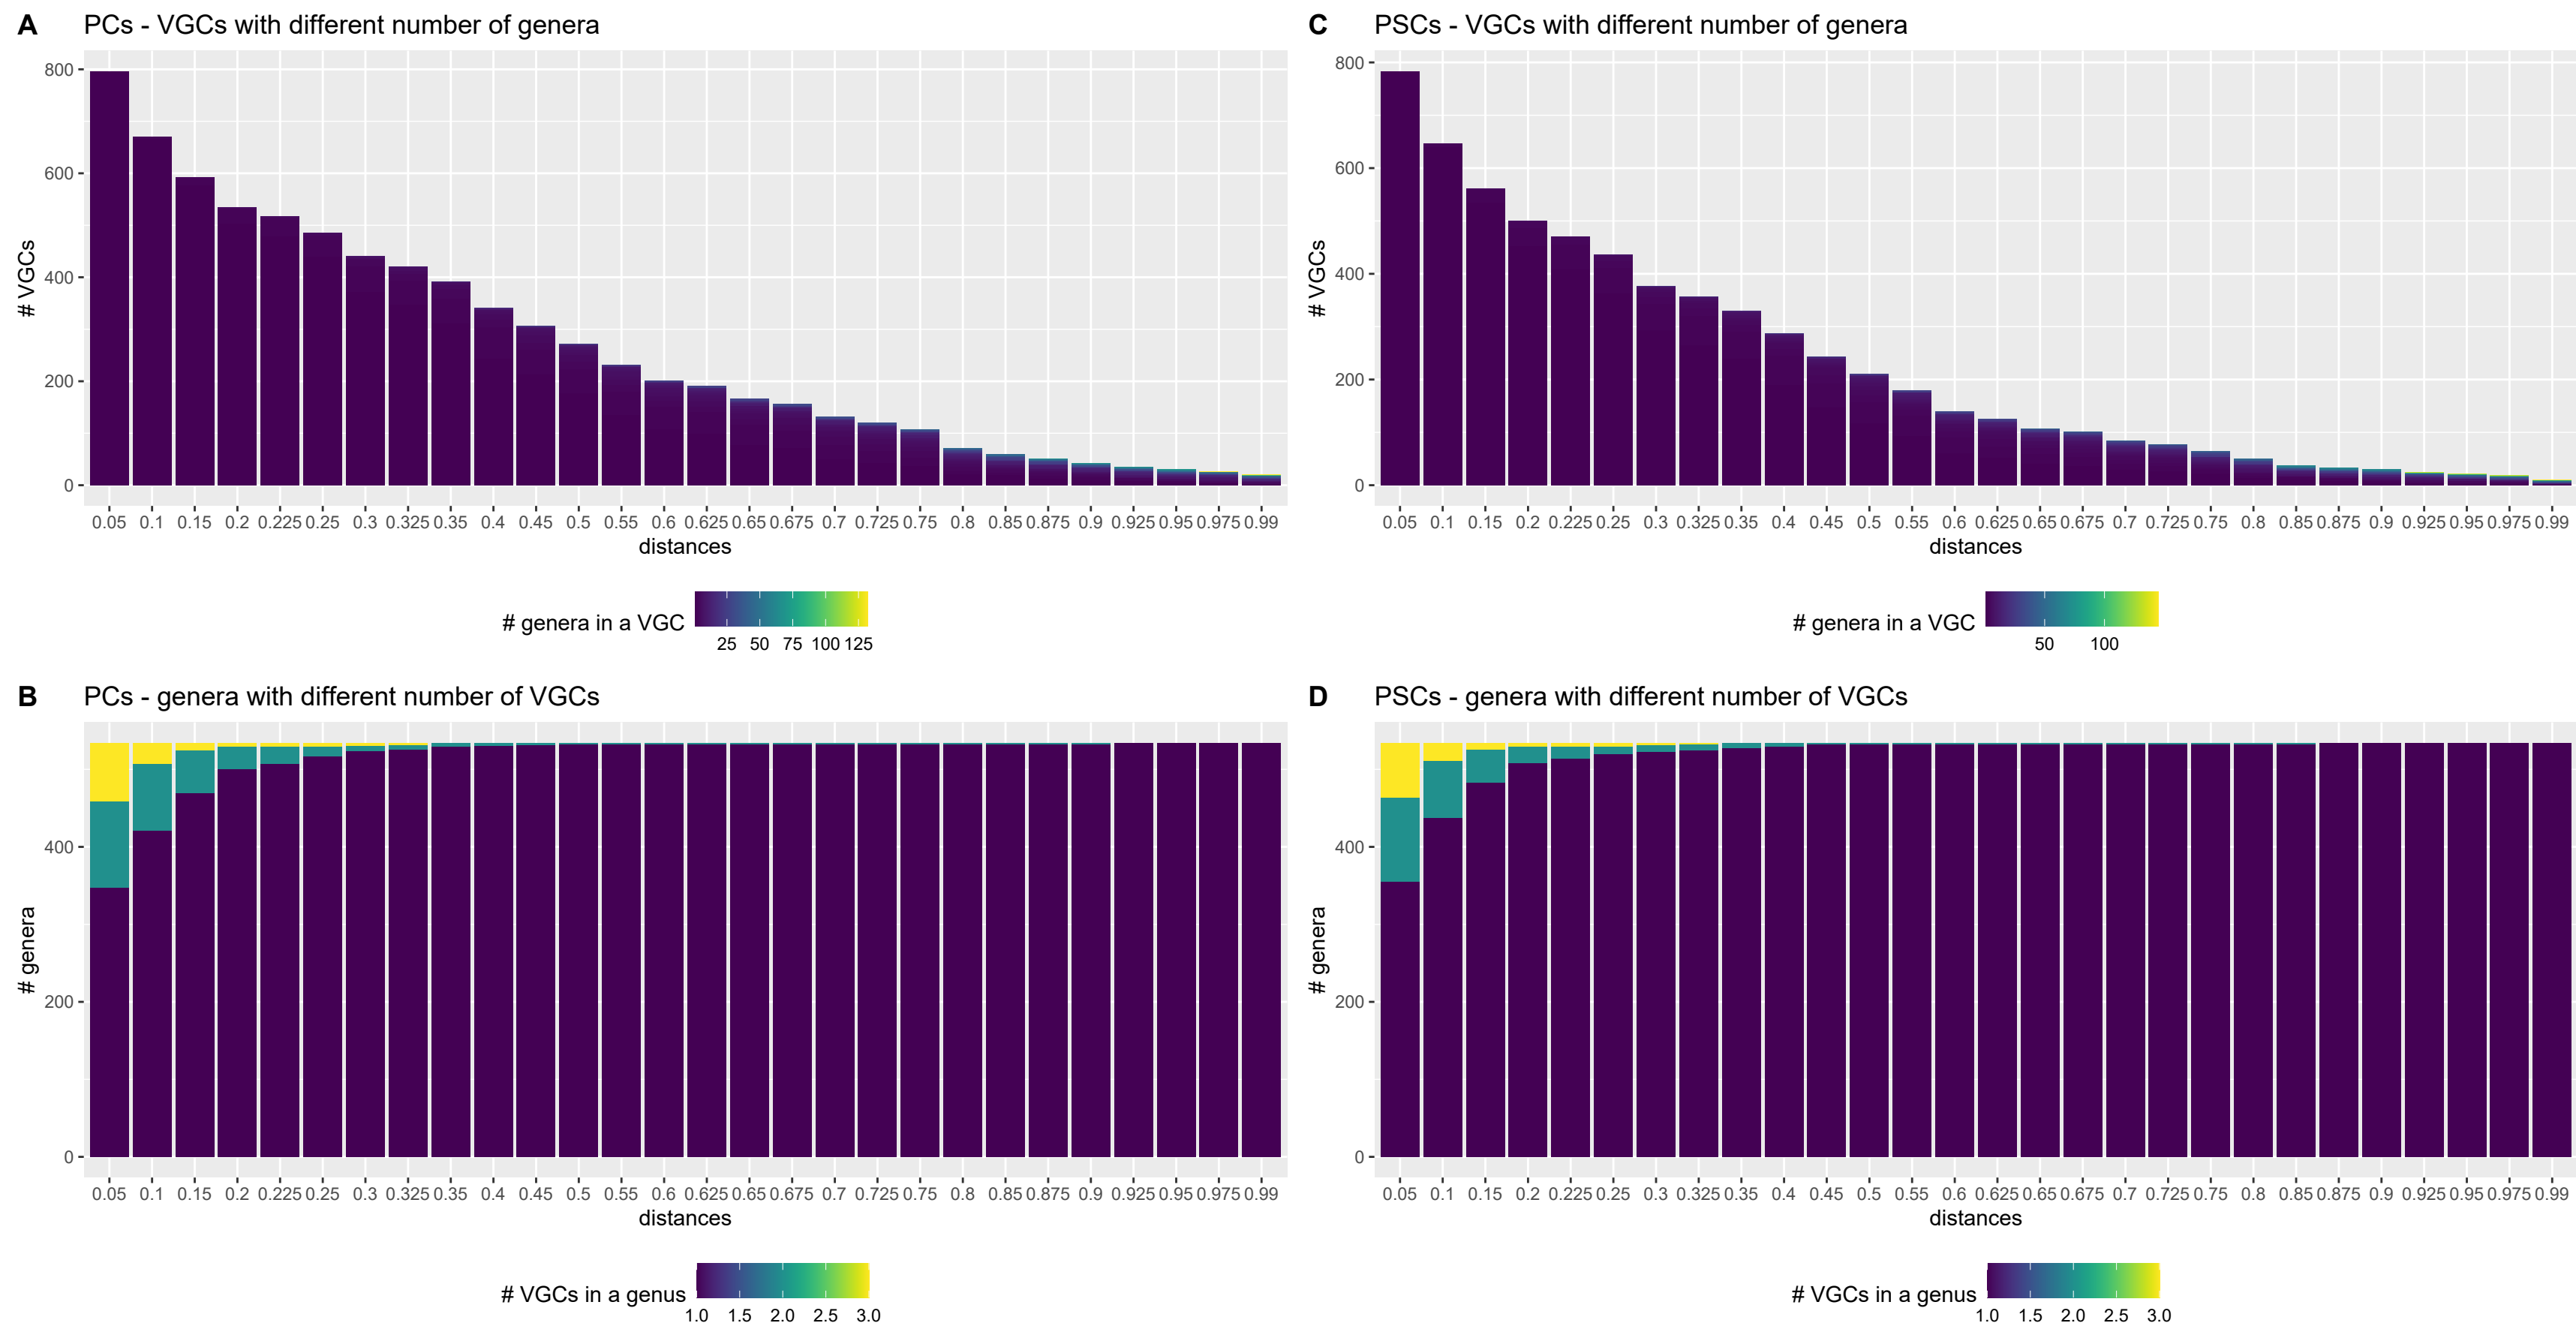

Fig. S3: Relationship between the number of VGCs and genera for *Duplodnaviria*, when the PC- and PSC-based genomic trees of the Fam\_DB dataset were cut with different intergenomic distances.

**A** PCs - VGCs with different number of orders

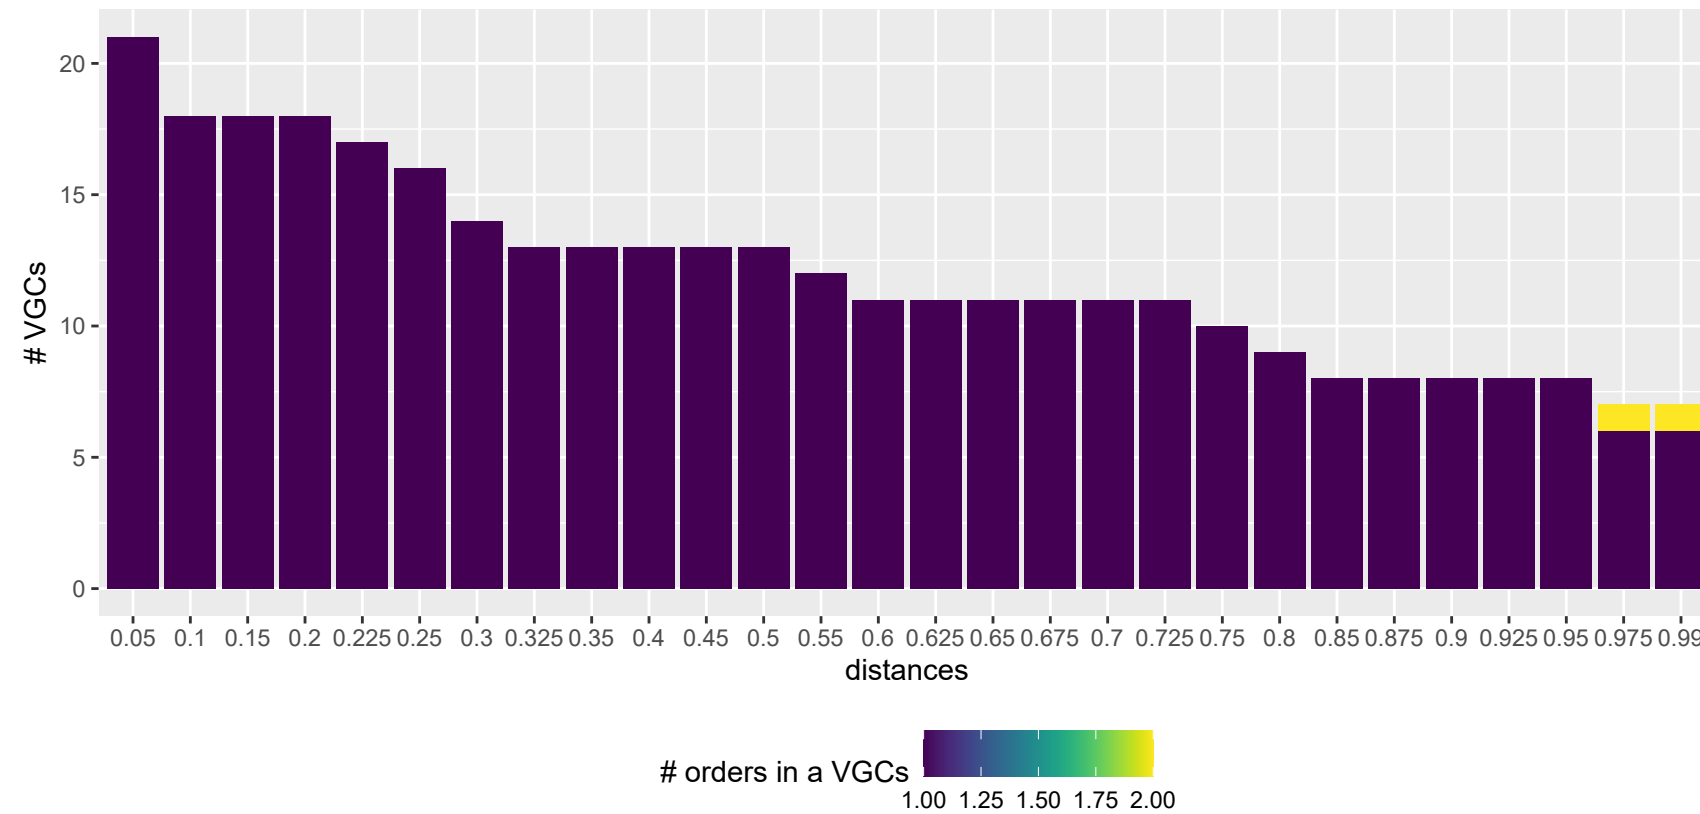

**C** PSCs - VGCs with different number of orders

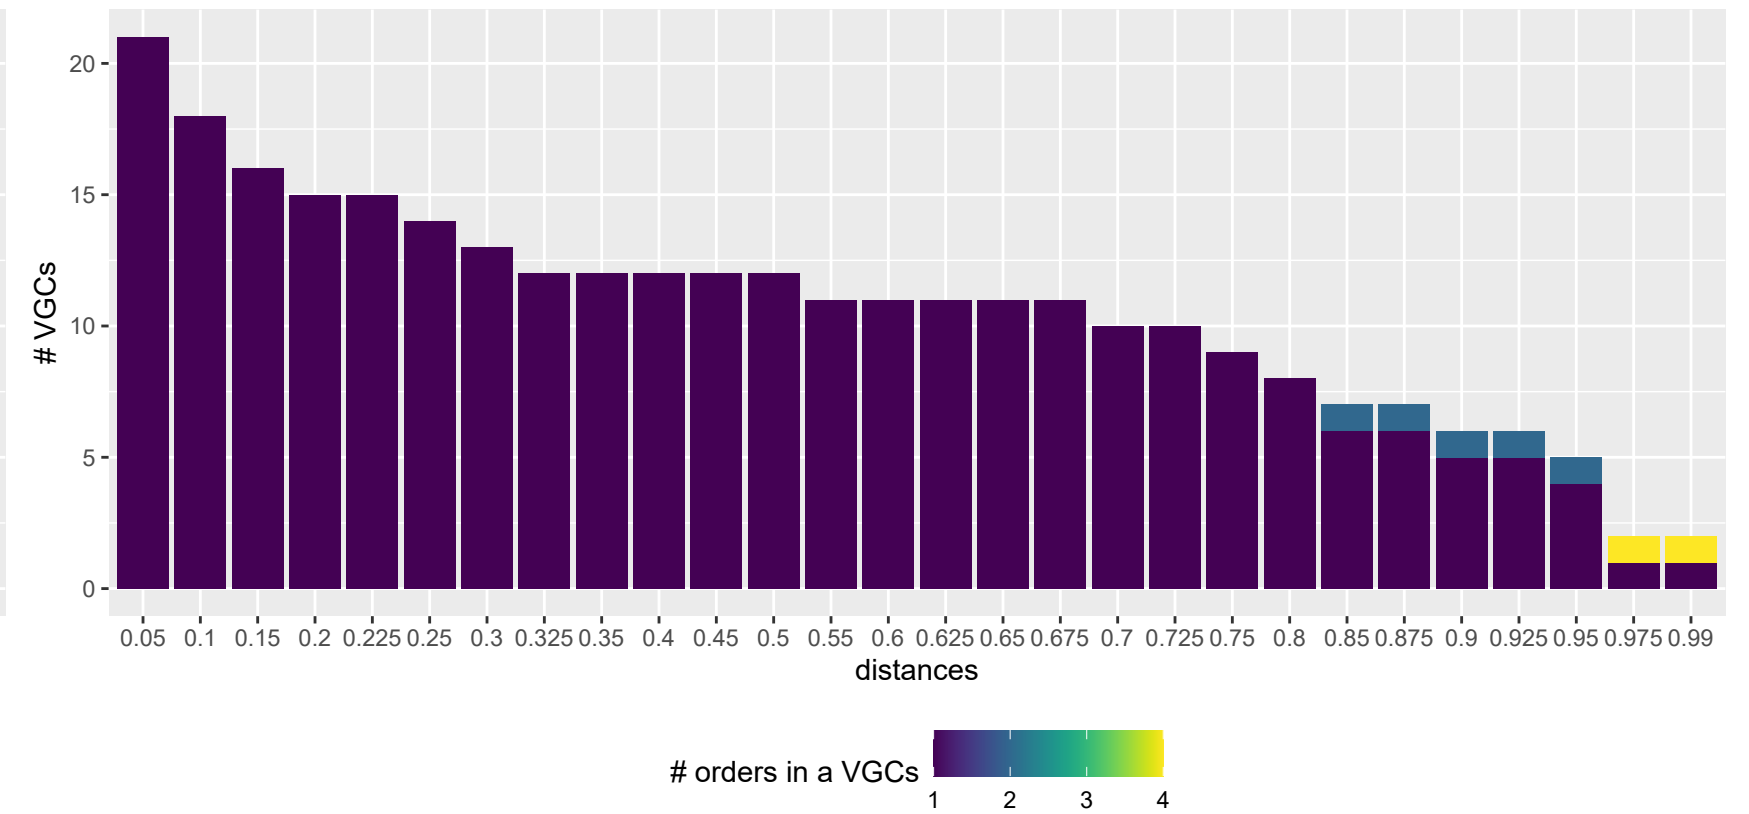

**B** PCs - orders with different number of VGCs

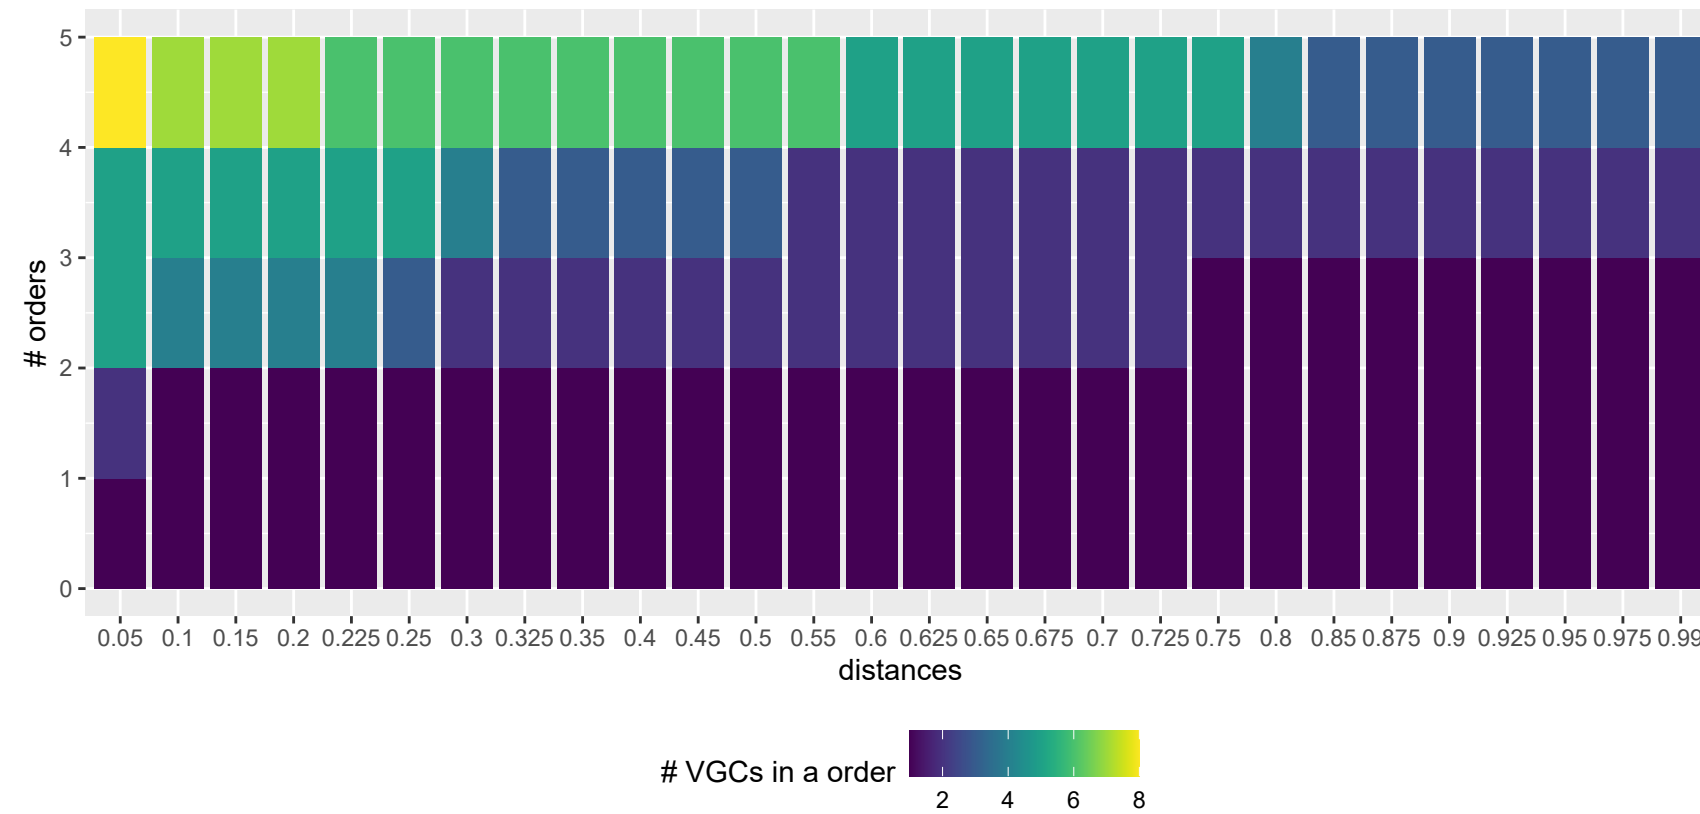

**D** PSCs - orders with different number of VGCs

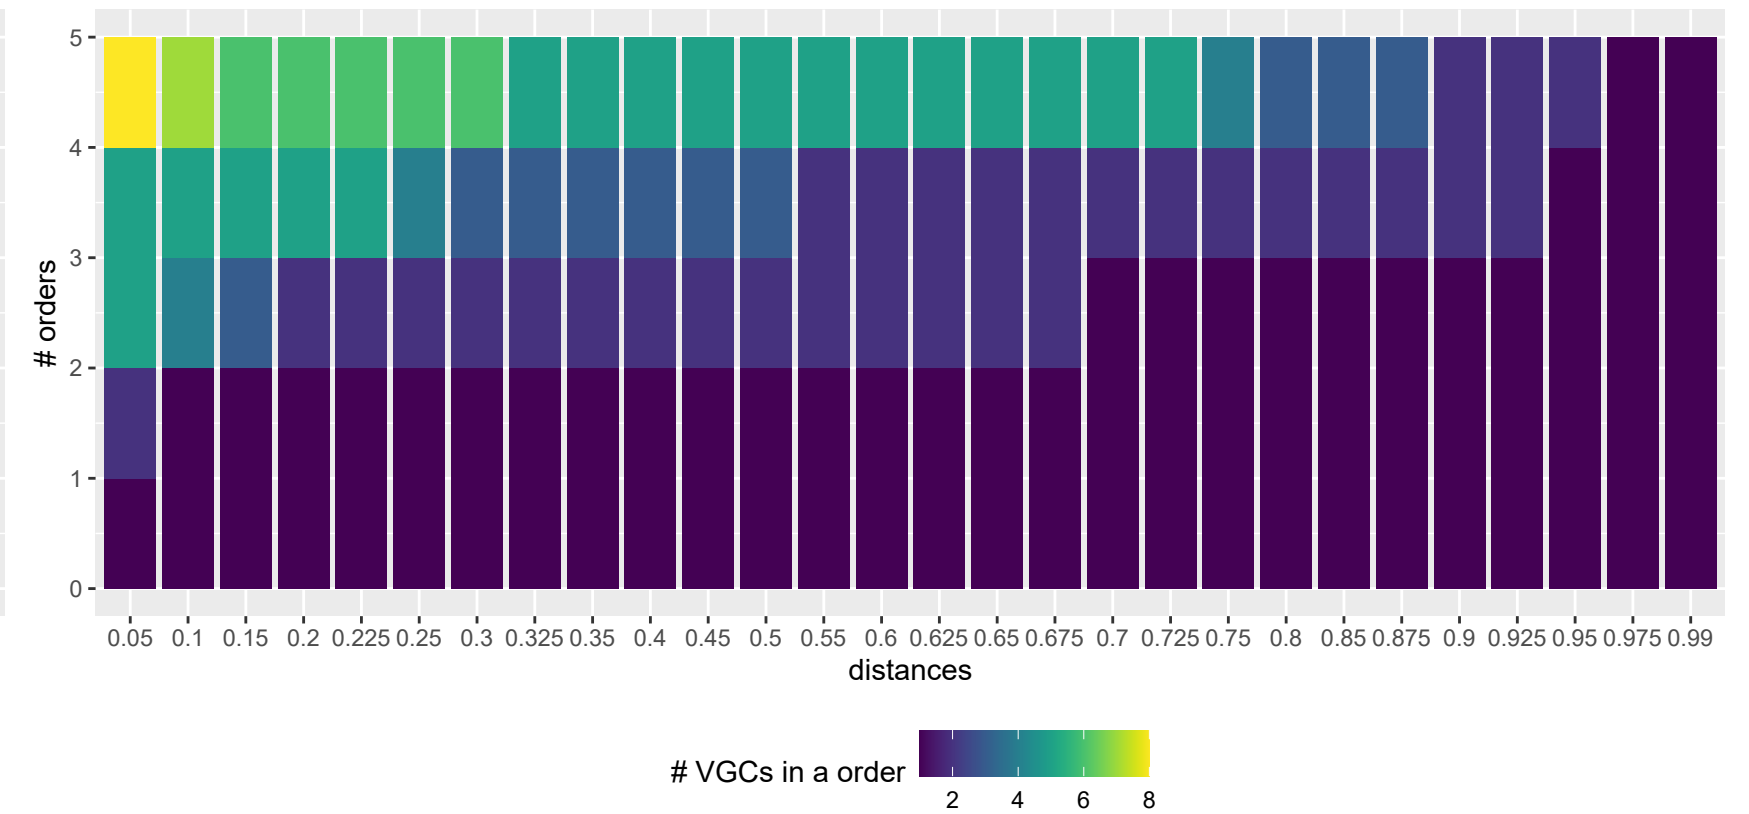

Fig. S4: Relationship between the number of VGCs and orders for *Varidnaviria*, when the PC- and PSC-based genomic trees of the Fam\_DB dataset were cut with different intergenomic distances.

**A** PCs - VGCs with different number of families

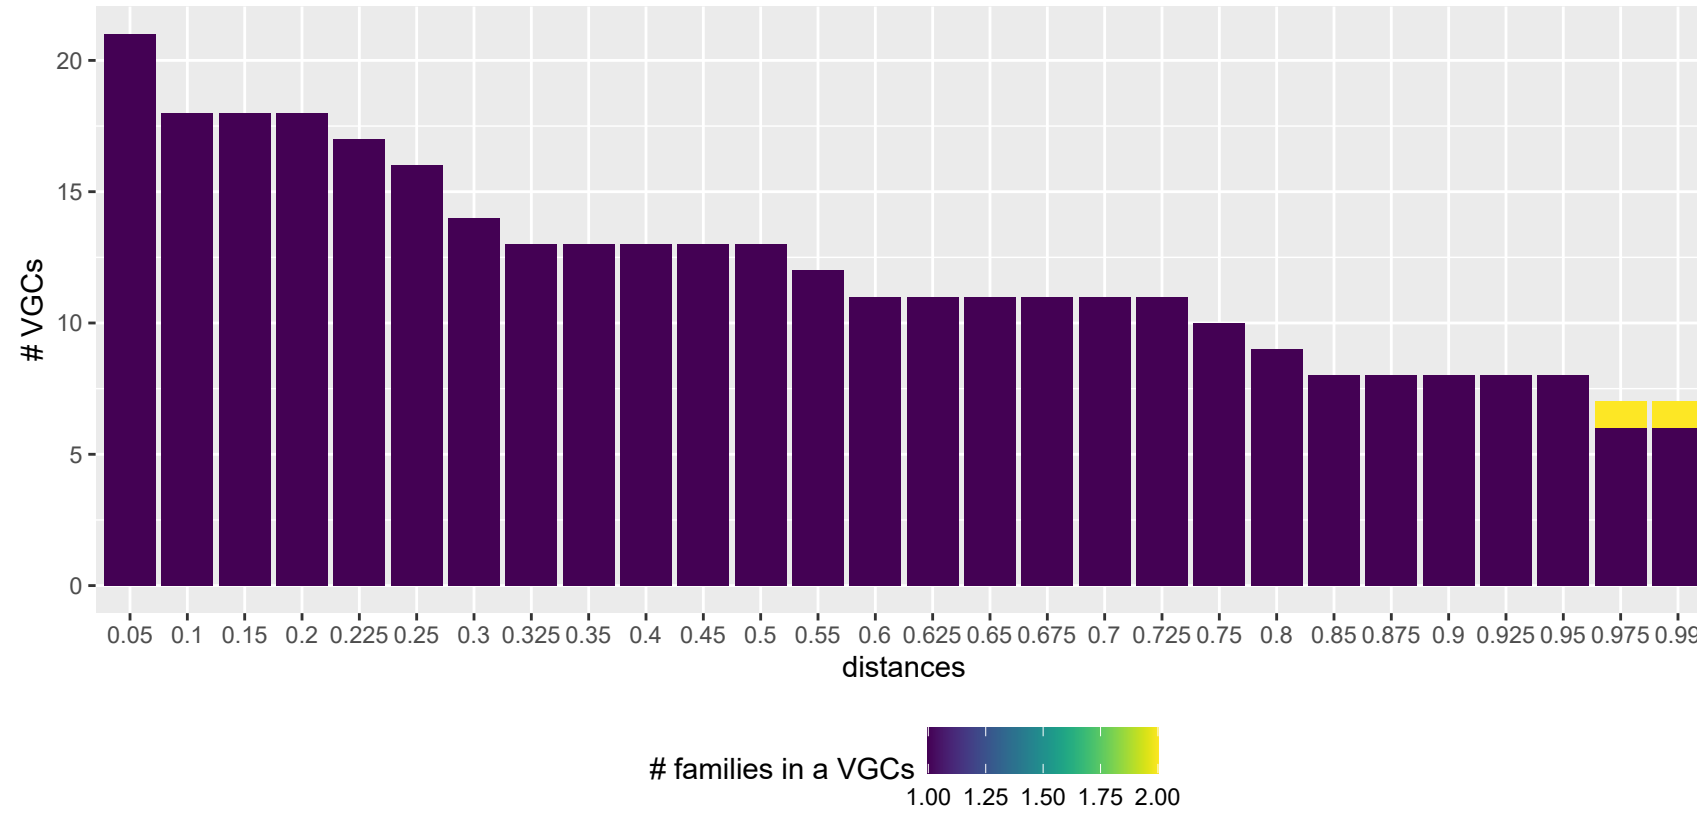

**C** PSCs - VGCs with different number of families

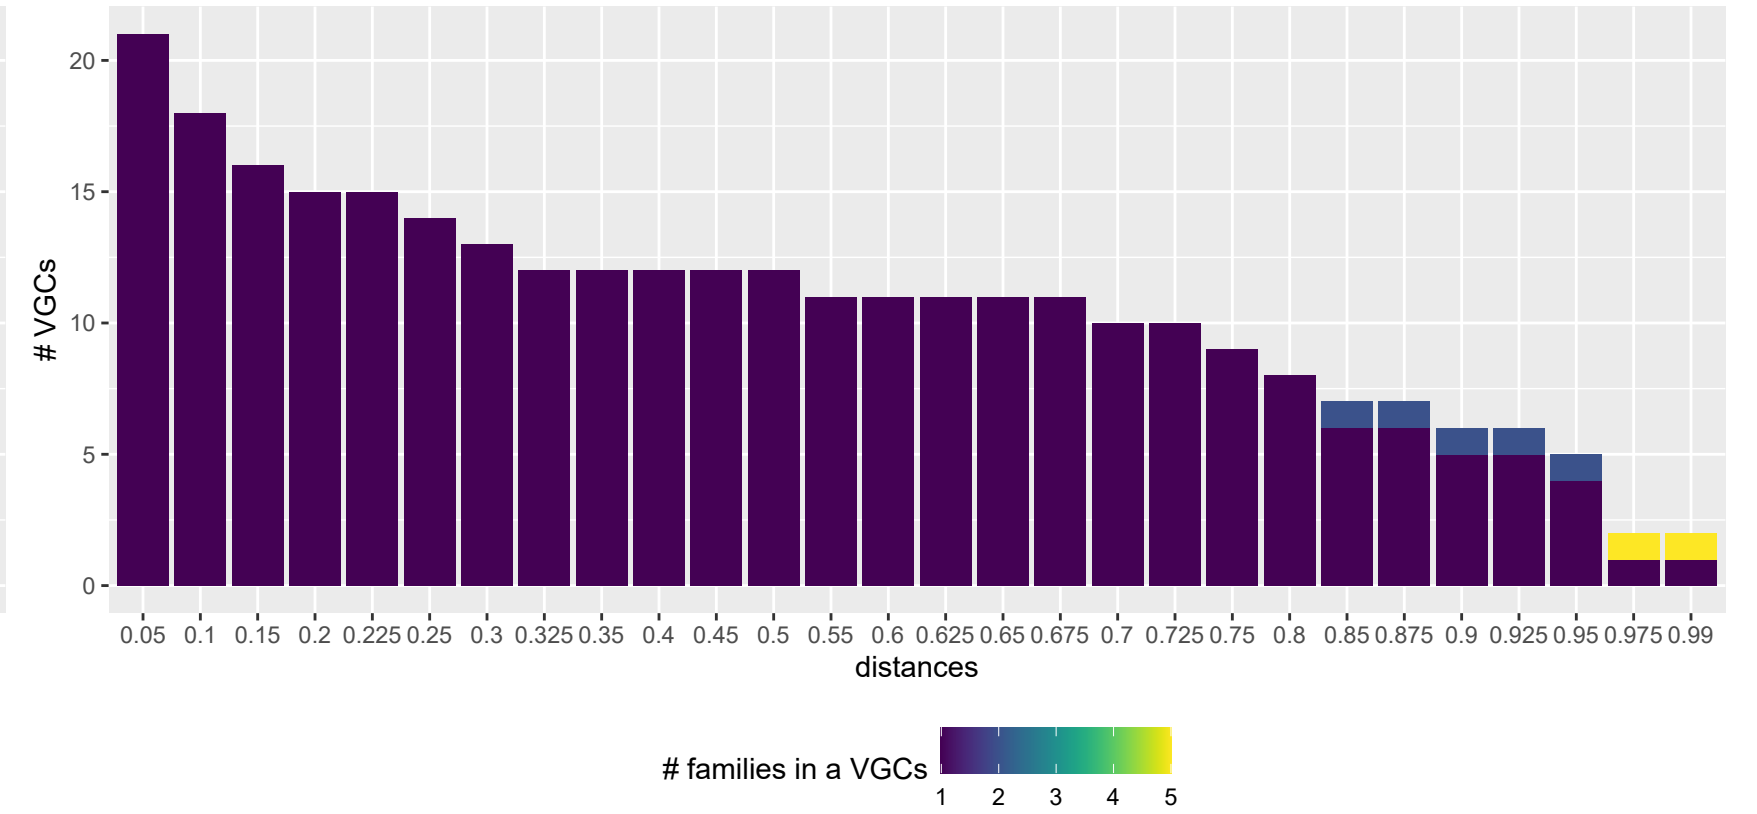

**B** PCs - Families with different number of VGCs

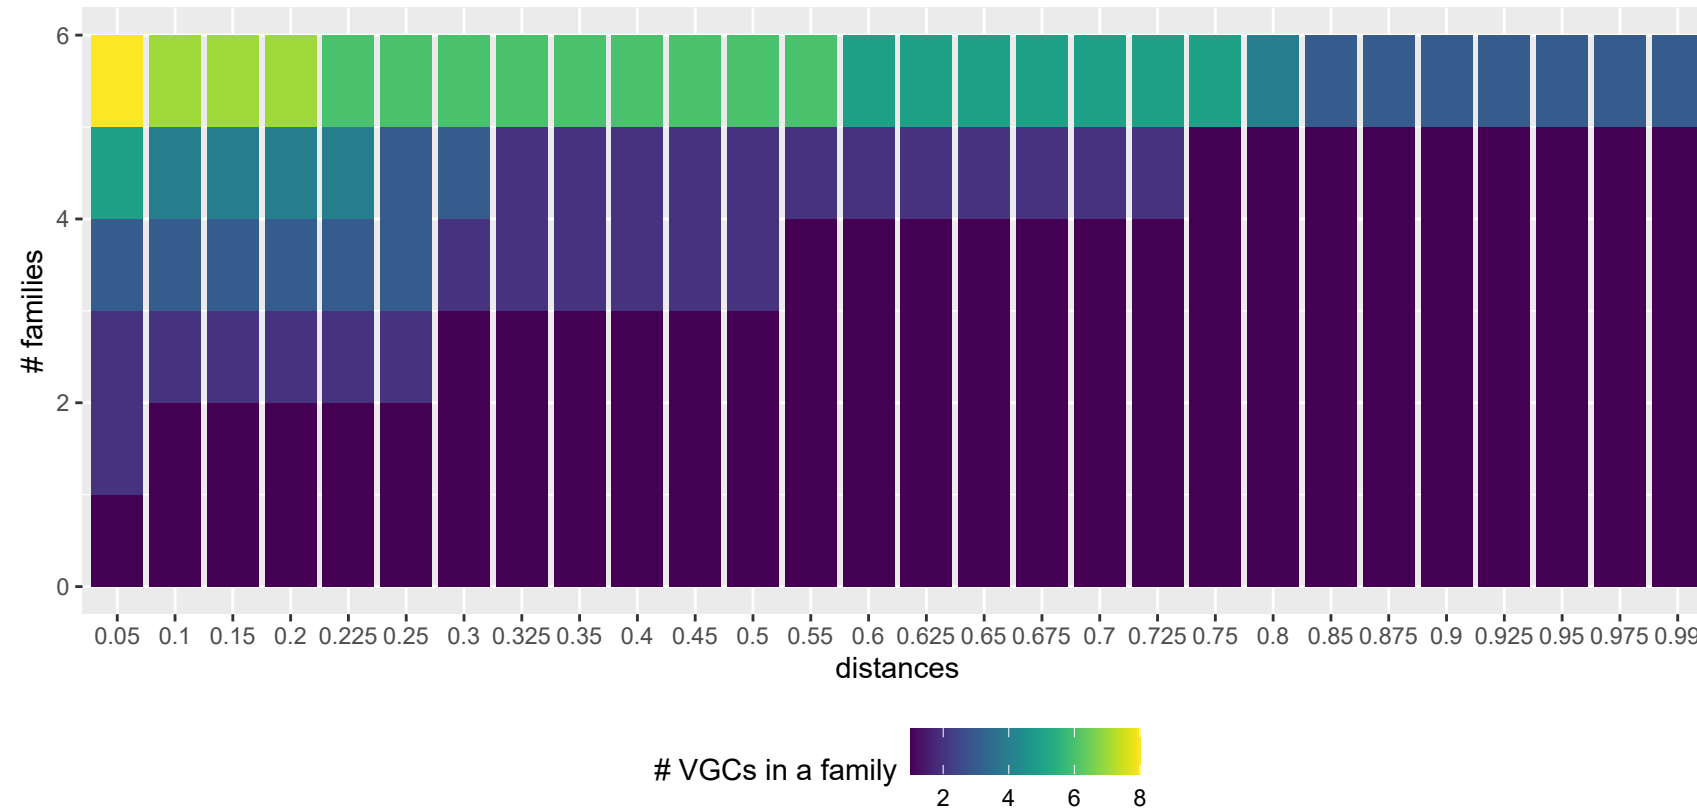

**D** PSCs - Families with different number of VGCs

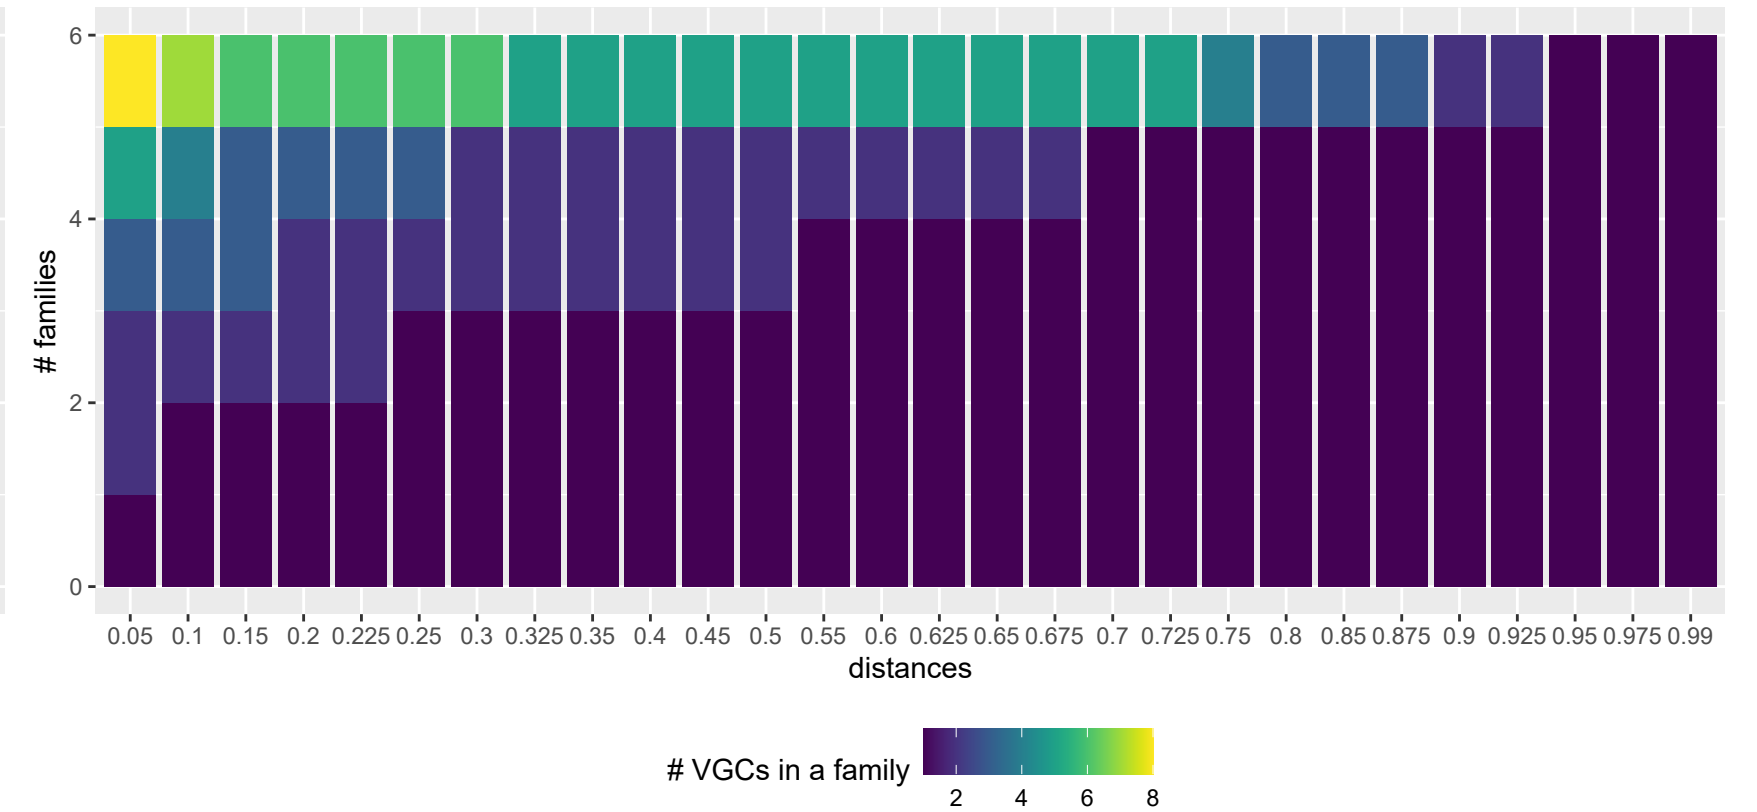

Fig. S5: Relationship between the number of VGCs and families for *Varidnaviria*, when the PC- and PSC-based genomic trees of the Fam\_DB dataset were cut with different intergenomic distances.

**A** PCs - VGCs with different number of genera

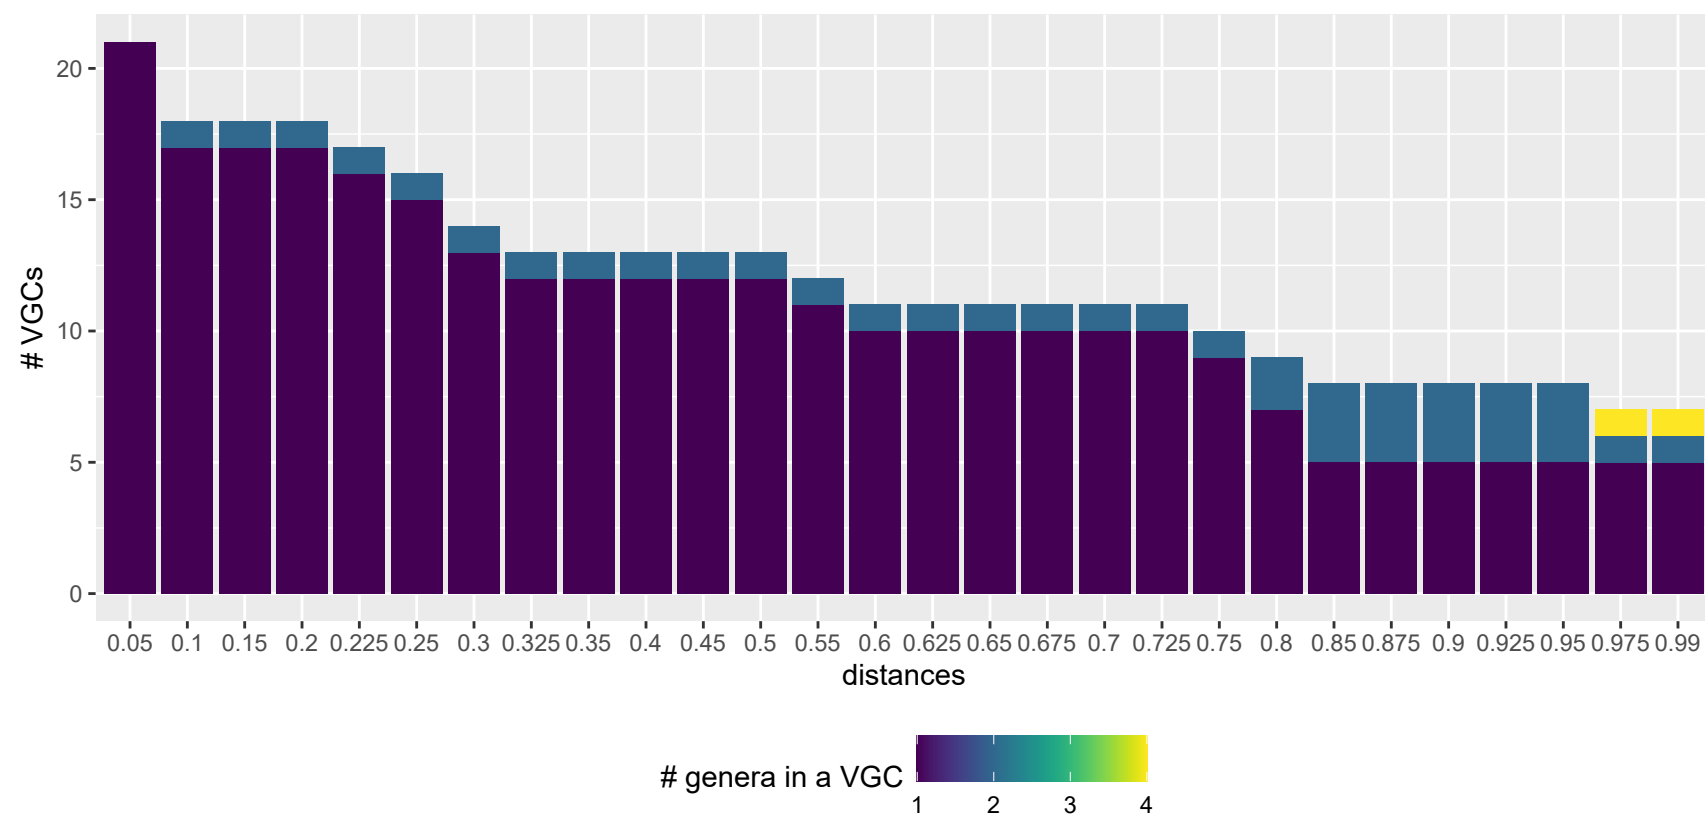

**C** PSCs - VGCs with different number of genera

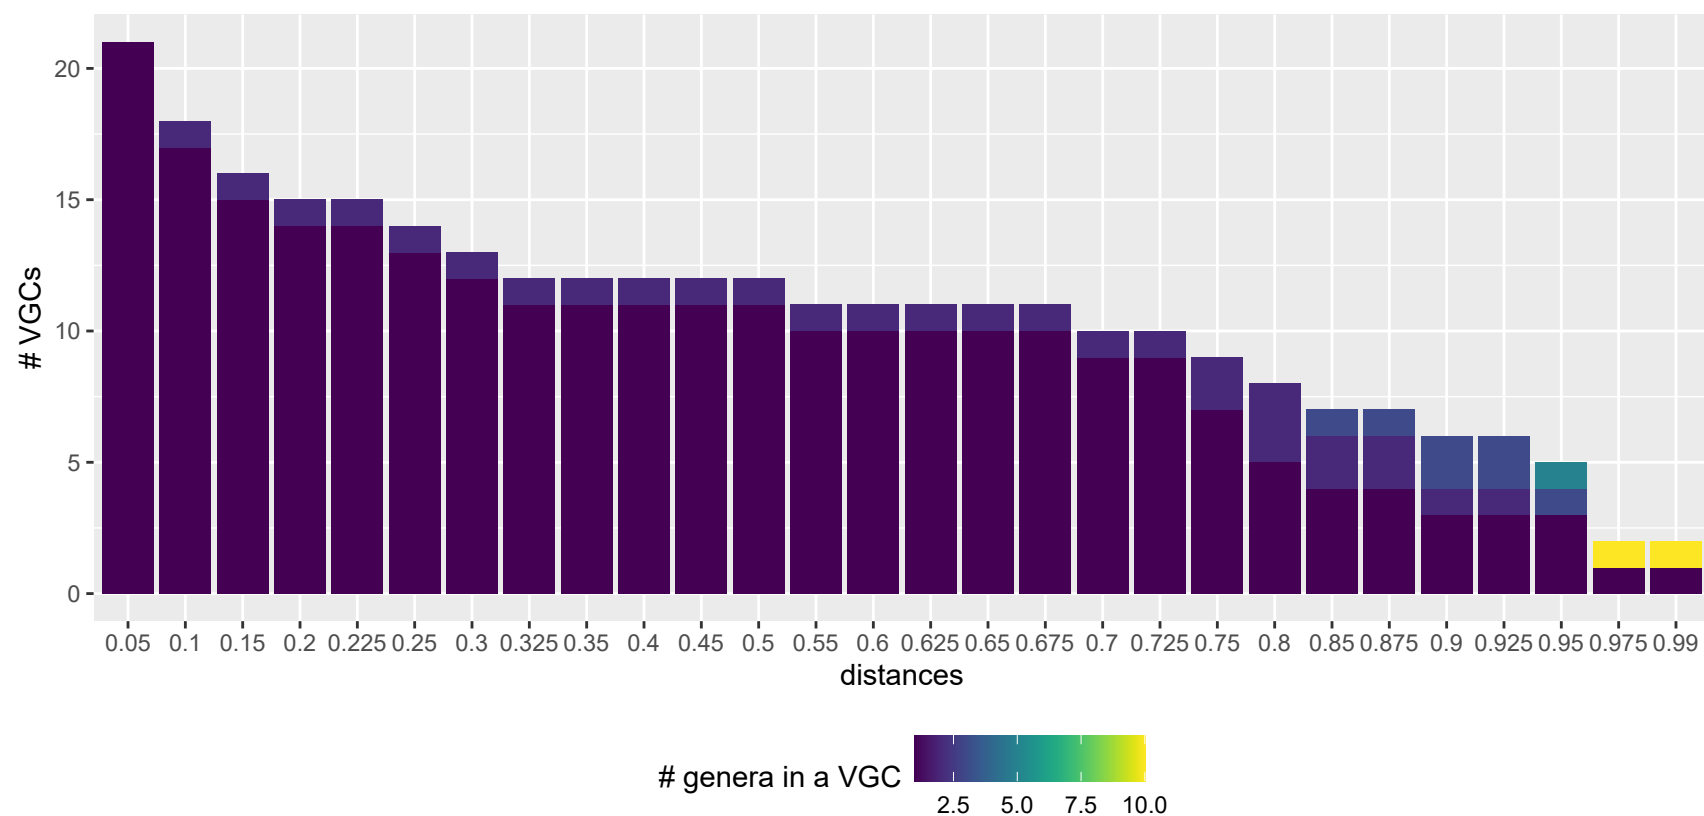

**B** PCs - genera with different number of VGCs

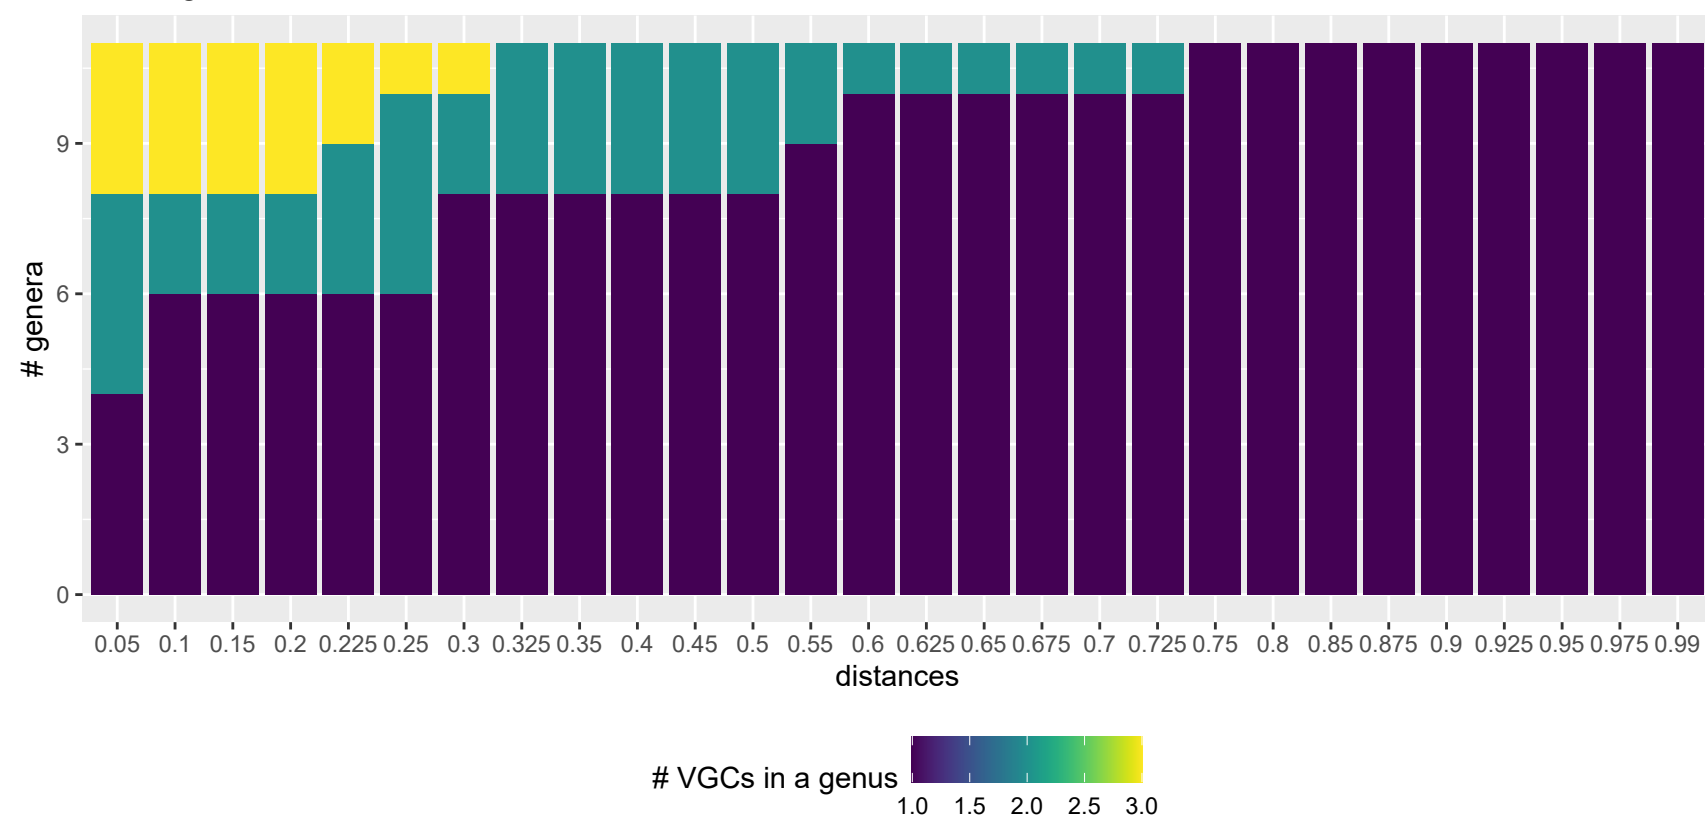

**D** PSCs - genera with different number of VGCs

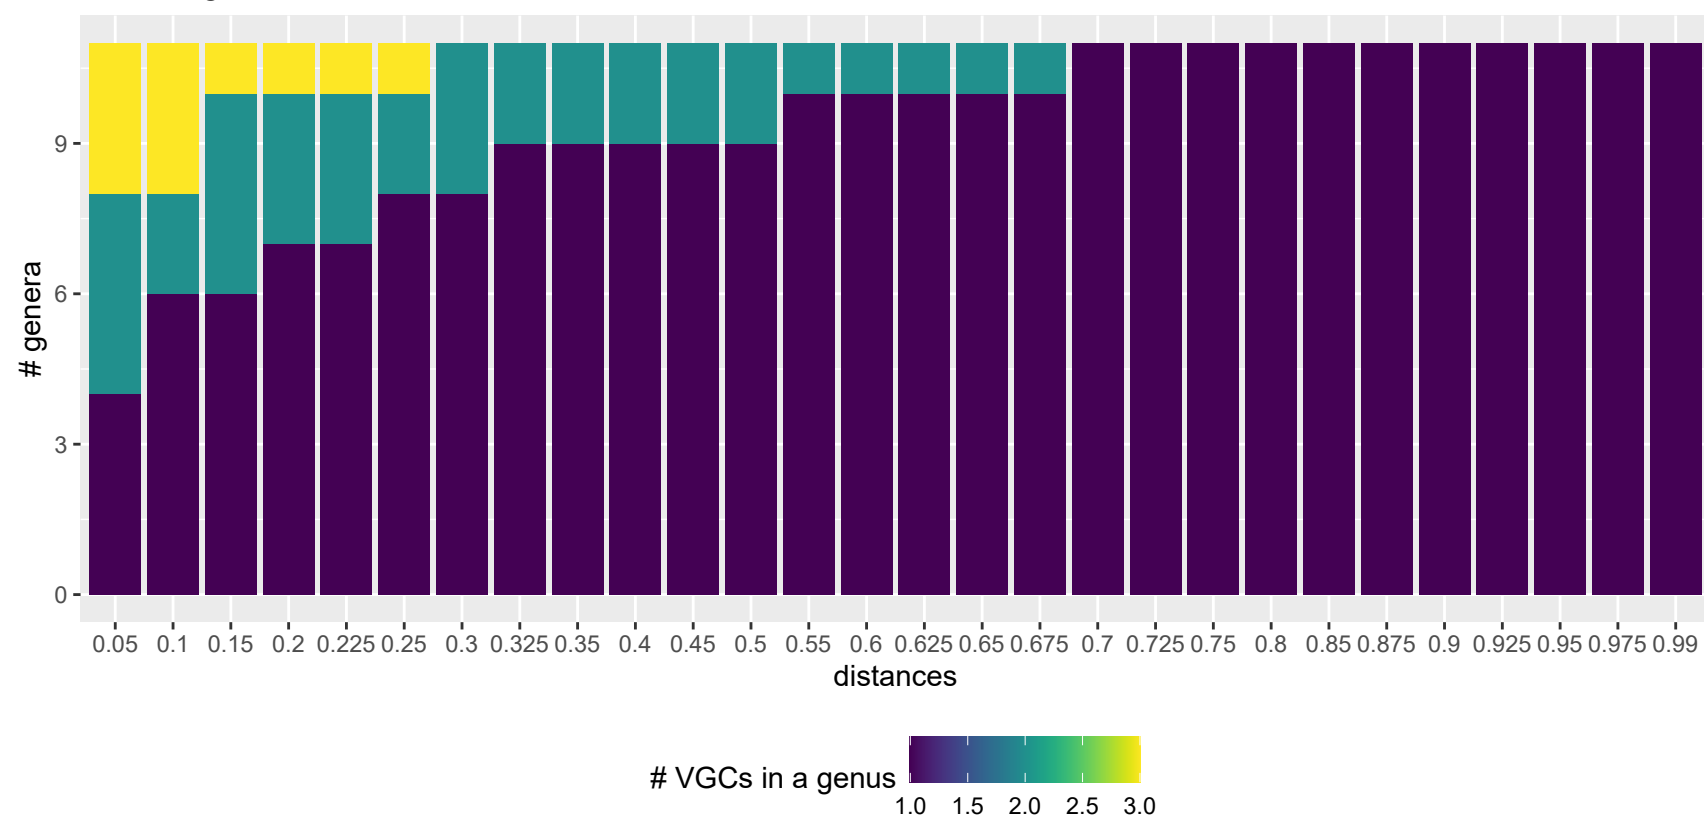

Fig. S6: Relationship between the number of VGCs and genera for *Varidnaviria*, when the PC- and PSC-based genomic trees of the Fam\_DB dataset were cut with different intergenomic distances.
