# Supplementary material for: VirClust—A Tool for Hierarchical Clustering, Core Protein Detection and Annotation of (Prokaryotic) Viruses
Source: Viruses. 2023 Apr 19;15(4):1007. doi: 10.3390/v15041007 (PMC10143988; doi:10.3390/v15041007)
Supplement: Supplementary file 1 [file viruses-15-01007-s001.zip]

Archive with 10 entries (10 files):
- SI_File10_corePSCs.xlsx
- SI_File1_dsDNA_DB.tsv
- SI_File2_VirClust-v2_manual_web-server.pdf
- SI_File3_VirClust-v2_manual_standalone.pdf
- SI_file4_Crz_DB_interegenomic_distances_genomic_trees.pdf
- SI_File5_protein_clustering_threholds_annots.xlsx
- SI_File6_dsDNA_DB_PC_trees.pdf
- SI_File7_dsDNA_DB_PSC_trees.pdf
- SI_File8_Fam_DB_PSC_trees_extended.pdf
- SI_File9_Binder_alldist_Duplod_Varid.pdf
