# Supplementary material for: VirClust—A Tool for Hierarchical Clustering, Core Protein Detection and Annotation of (Prokaryotic) Viruses
Source: Viruses. 2023 Apr 19;15(4):1007. doi: 10.3390/v15041007 (PMC10143988; doi:10.3390/v15041007)
Supplement: Supplementary file 1 [file viruses-15-01007-s001.zip › SI_File1_dsDNA_DB.tsv]

genome	Realm	Kingdom	Phylum	Class	Order	Family	Subfamily	Genus	Subgenus	Species	Virus.name	Virus.name.abbreviation.s.	Virus.isolate.designation	Genome.coverage	Genome.composition
GCA_000836965.1_ViralProj14048	Duplodnaviria	Heunggongvirae	Uroviricota	Caudoviricetes			Hendrixvirinae	Shamshuipovirus	NA	Shamshuipovirus HK022	Escherichia phage HK022			CG	dsDNA
GCA_000837025.1_ViralProj14062	Varidnaviria	Bamfordvirae	Preplasmiviricota	Tectiliviricetes	Kalamavirales	Tectiviridae		Alphatectivirus	NA	Pseudomonas virus PRD1	Enterobacteria phage PRD1			CG	dsDNA
GCA_000837225.1_ViralProj14105	Duplodnaviria	Heunggongvirae	Uroviricota	Caudoviricetes				Muvirus	NA	Muvirus mu	Escherichia phage Mu			CG	dsDNA
GCA_000837465.1_ViralProj14154	Duplodnaviria	Heunggongvirae	Uroviricota	Caudoviricetes			Weiservirinae	Timquatrovirus	NA	Mycobacterium virus TM4	Mycobacterium phage TM4			CG	dsDNA
GCA_000837485.1_ViralProj14160	Duplodnaviria	Heunggongvirae	Uroviricota	Caudoviricetes				Psimunavirus	NA	Psimunavirus psiM2	Methanobacterium phage psiM2			CG	dsDNA
GCA_000837665.1_ViralProj14029	Duplodnaviria	Heunggongvirae	Uroviricota	Caudoviricetes				Ceduovirus	NA	Ceduovirus c2	Lactobacillus phage c2			CG	dsDNA
GCA_000837685.1_ViralProj14034	Duplodnaviria	Heunggongvirae	Uroviricota	Caudoviricetes				Spbetavirus	NA	Bacillus virus SPbeta	Bacillus phage SPBc2			CG	dsDNA
GCA_000837745.1_ViralProj14047	Duplodnaviria	Heunggongvirae	Uroviricota	Caudoviricetes				Sendosyvirus	NA	Sendosyvirus APSE1	Acyrthosiphon pisum bacteriophage APSE-1			CG	dsDNA
GCA_000837885.1_ViralProj14078	Duplodnaviria	Heunggongvirae	Uroviricota	Caudoviricetes		Peduoviridae		Hpunavirus	NA	Hpunavirus HP1	Haemophilus phage HP1			CG	dsDNA
GCA_000838165.1_ViralProj14136	Duplodnaviria	Heunggongvirae	Uroviricota	Caudoviricetes				Delislevirus	NA	Delislevirus P1	Mycoplasma virus P1			CG	dsDNA
GCA_000838905.1_ViralProj14115	Duplodnaviria	Heunggongvirae	Uroviricota	Caudoviricetes				Lederbergvirus	NA	Lederbergvirus HK620	Enterobacteria phage HK620			CG	dsDNA
GCA_000839045.1_ViralProj14144	Duplodnaviria	Heunggongvirae	Uroviricota	Caudoviricetes		Peduoviridae		Longwoodvirus	NA	Longwoodvirus K139	Bacteriophage K139			CG	dsDNA
GCA_000839625.1_ViralProj14086	Duplodnaviria	Heunggongvirae	Uroviricota	Caudoviricetes				Ravinvirus	NA	Escherichia virus N15	Escherichia phage N15			CG	dsDNA
GCA_000839905.1_ViralProj14142	Duplodnaviria	Heunggongvirae	Uroviricota	Caudoviricetes				Psavirus	NA	Listeria virus PSA	Listeria phage PSA			CG	dsDNA
GCA_000839925.2_ViralProj14147	Duplodnaviria	Heunggongvirae	Uroviricota	Caudoviricetes				Haloferacalesvirus	NA	Haloferacalesvirus HF2	Halorubrum virus HF2	HF2		CG	dsDNA
GCA_000840305.1_ViralProj14216	Duplodnaviria	Heunggongvirae	Uroviricota	Caudoviricetes		Salasmaviridae	Picovirinae	Beecentumtrevirus	NA	Beecentumtrevirus B103	Bacillus phage B103			CG	dsDNA
GCA_000840405.1_ViralProj14237	Varidnaviria	Bamfordvirae	Preplasmiviricota	Tectiliviricetes	Vinavirales	Corticoviridae		Corticovirus	NA	Pseudoalteromonas virus PM2	Pseudoalteromonas virus PM2	PM2		CG	dsDNA
GCA_000840565.1_ViralProj14270	Duplodnaviria	Heunggongvirae	Uroviricota	Caudoviricetes				Kostyavirus	NA	Mycobacterium virus CJW1	Mycobacterium phage CJW1			CG	dsDNA
GCA_000840585.1_ViralProj14274	Duplodnaviria	Heunggongvirae	Uroviricota	Caudoviricetes				Barnyardvirus	NA	Barnyardvirus barnyard	Mycobacterium phage Barnyard			CG	dsDNA
GCA_000840625.2_ViralProj14285	Duplodnaviria	Heunggongvirae	Uroviricota	Caudoviricetes				Uetakevirus	NA	Uetakevirus epsilon15	Salmonella phage Epsilon15			CG	dsDNA
GCA_000840725.1_ViralProj14305	Duplodnaviria	Heunggongvirae	Uroviricota	Caudoviricetes		Casjensviridae		Nazgulvirus	NA	Burkholderia virus BcepNazgul	Burkholderia phage BcepNazgul			CG	dsDNA
GCA_000840845.1_ViralProj14330	Duplodnaviria	Heunggongvirae	Uroviricota	Caudoviricetes				Stanholtvirus	NA	Burkholderia virus phiE125	Burkholderia phage phiE125			CG	dsDNA
GCA_000840865.2_ViralProj14335	Duplodnaviria	Heunggongvirae	Uroviricota	Caudoviricetes				Lessievirus	NA	Lessievirus bcep22	Burkholderia phage Bcep22			CG	dsDNA
GCA_000840885.2_ViralProj14339	Duplodnaviria	Heunggongvirae	Uroviricota	Caudoviricetes			Gracegardnervirinae	Avanivirus	NA	Avanivirus Che9d	Mycobacterium phage Che9d			CG	dsDNA
GCA_000840945.1_ViralProj14352	Duplodnaviria	Heunggongvirae	Uroviricota	Caudoviricetes			Bronfenbrennervirinae	Biseptimavirus	NA	Biseptimavirus bv77	Staphylococcus phage 77			CG	dsDNA
GCA_000841185.1_ViralProj14234	Duplodnaviria	Heunggongvirae	Uroviricota	Caudoviricetes				Vhmlvirus	NA	Vhmlvirus VHML	Vibrio phage VHML			CG	dsDNA
GCA_000841245.1_ViralProj14246	Duplodnaviria	Heunggongvirae	Uroviricota	Caudoviricetes			Azeredovirinae	Dubowvirus	NA	Dubowvirus dv11	Staphylococcus phage phi 11			CG	dsDNA
GCA_000841365.1_ViralProj14271	Duplodnaviria	Heunggongvirae	Uroviricota	Caudoviricetes				Chenonavirus	NA	Chenonavirus Che9c	Mycobacterium phage Che9c			CG	dsDNA
GCA_000841385.2_ViralProj14275	Duplodnaviria	Heunggongvirae	Uroviricota	Caudoviricetes				Microwolfvirus	NA	Microwolfvirus Bxz2	Mycobacterium phage Bxz2			CG	dsDNA
GCA_000841405.1_ViralProj14280	Duplodnaviria	Heunggongvirae	Uroviricota	Caudoviricetes		Peduoviridae		Peduovirus	NA	Peduovirus L413C	Yersinia phage L-413C			CG	dsDNA
GCA_000841465.2_ViralProj14294	Duplodnaviria	Heunggongvirae	Uroviricota	Caudoviricetes				Haloferacalesvirus	NA	Haloferacalesvirus HF1	Halovirus HF1	HF1		CG	dsDNA
GCA_000841545.1_ViralProj14311	Varidnaviria	Bamfordvirae	Preplasmiviricota	Tectiliviricetes	Kalamavirales	Tectiviridae		Betatectivirus	NA	Bacillus virus Bam35	Bacillus phage Bam35c	BVBam35		CG	dsDNA
GCA_000841725.1_ViralProj14353	Duplodnaviria	Heunggongvirae	Uroviricota	Caudoviricetes				Rauchvirus	NA	Rauchvirus BPP1	Bordetella phage BPP-1			CG	dsDNA
GCA_000841805.1_ViralProj14376	Duplodnaviria	Heunggongvirae	Uroviricota	Caudoviricetes				Bcepmuvirus	NA	Bcepmuvirus bcepMu	Burkholderia phage BcepMu			CG	dsDNA
GCA_000842085.1_ViralProj14248	Duplodnaviria	Heunggongvirae	Uroviricota	Caudoviricetes			Bronfenbrennervirinae	Peeveelvirus	NA	Peeveelvirus pv13	Staphylococcus phage 13			CG	dsDNA
GCA_000842165.1_ViralProj14265	Duplodnaviria	Heunggongvirae	Uroviricota	Caudoviricetes		Autographiviridae	Studiervirinae	Ghunavirus	NA	Ghunavirus gh1	Pseudomonas phage gh-1			CG	dsDNA
GCA_000842265.1_ViralProj14288	Duplodnaviria	Heunggongvirae	Uroviricota	Caudoviricetes		Rountreeviridae		Fischettivirus	NA	Fischettivirus C1	Streptococcus phage C1			CG	dsDNA
GCA_000842285.1_ViralProj14292	Duplodnaviria	Heunggongvirae	Uroviricota	Caudoviricetes				Xipdecavirus	NA	Xanthomonas virus Xp10	Xanthomonas phage Xp10			CG	dsDNA
GCA_000842345.1_ViralProj14304	Duplodnaviria	Heunggongvirae	Uroviricota	Caudoviricetes			Bclasvirinae	Rosebushvirus	NA	Mycobacterium virus Rosebush	Mycobacterium phage Rosebush			CG	dsDNA
GCA_000842365.1_ViralProj14309	Duplodnaviria	Heunggongvirae	Uroviricota	Caudoviricetes			Ceeclamvirinae	Bixzunavirus	NA	Bixzunavirus Bxz1	Mycobacterium phage Bxz1			CG	dsDNA
GCA_000842425.1_ViralProj14321	Duplodnaviria	Heunggongvirae	Uroviricota	Caudoviricetes		Straboviridae		Biquartavirus	NA	Biquartavirus 44RR2	Aeromonas phage 44RR2.8t			CG	dsDNA
GCA_000842485.1_ViralProj14334	Duplodnaviria	Heunggongvirae	Uroviricota	Caudoviricetes				Casadabanvirus	NA	Casadabanvirus D3112	Pseudomonas phage D3112			CG	dsDNA
GCA_000842865.1_ViralProj14231	Duplodnaviria	Heunggongvirae	Uroviricota	Caudoviricetes		Peduoviridae		Hpunavirus	NA	Hpunavirus HP2	Haemophilus phage HP2			CG	dsDNA
GCA_000842885.1_ViralProj14235	Varidnaviria	Helvetiavirae	Dividoviricota	Laserviricetes	Halopanivirales	Matshushitaviridae		Hukuchivirus	NA	Hukuchivirus IN93	Thermus phage IN93	IN93		CG	dsDNA
GCA_000842965.1_ViralProj14251	Duplodnaviria	Heunggongvirae	Uroviricota	Caudoviricetes				Phikzvirus	NA	Phikzvirus phiKZ	Pseudomonas phage phiKZ			CG	dsDNA
GCA_000843045.1_ViralProj14268	Duplodnaviria	Heunggongvirae	Uroviricota	Caudoviricetes		Rountreeviridae	Rakietenvirinae	Rosenblumvirus	NA	Rosenblumvirus rv44AHJD	Staphylococcus phage phi44AHJD			CG	dsDNA
GCA_000843065.1_ViralProj14272	Duplodnaviria	Heunggongvirae	Uroviricota	Caudoviricetes				Corndogvirus	NA	Corndogvirus corndog	Mycobacterium phage Corndog			CG	dsDNA
GCA_000843085.1_ViralProj14276	Duplodnaviria	Heunggongvirae	Uroviricota	Caudoviricetes				Lomovskayavirus	NA	Streptomyces virus phiBT1	Streptomyces phage phiBT1			CG	dsDNA
GCA_000843125.1_ViralProj14287	Duplodnaviria	Heunggongvirae	Uroviricota	Caudoviricetes				Marienburgvirus	NA	Enterobacteria virus BP4795	Enterobacteria phage BP-4795			CG	dsDNA
GCA_000843145.1_ViralProj14291	Duplodnaviria	Heunggongvirae	Uroviricota	Caudoviricetes		Autographiviridae	Molineuxvirinae	Zindervirus	NA	Zindervirus SP6	Salmonella phage SP6			CG	dsDNA
GCA_000843225.1_ViralProj14308	Duplodnaviria	Heunggongvirae	Uroviricota	Caudoviricetes		Zobellviridae	Cobavirinae	Siovirus	NA	Roseobacter virus SIO1	Roseobacter phage SIO1			CG	dsDNA
GCA_000843245.1_ViralProj14312	Duplodnaviria	Heunggongvirae	Uroviricota	Caudoviricetes		Straboviridae		Cinqassovirus	NA	Cinqassovirus aeh1	Aeromonas phage Aeh1			CG	dsDNA
GCA_000843265.1_ViralProj14316	Duplodnaviria	Heunggongvirae	Uroviricota	Caudoviricetes		Zobellviridae		Vipivirus	NA	Vibrio virus VpV262	Vibrio phage VpV262			CG	dsDNA
GCA_000843405.1_ViralProj14345	Duplodnaviria	Heunggongvirae	Uroviricota	Caudoviricetes		Peduoviridae		Eganvirus	NA	Eganvirus PsP3	Salmonella phage PsP3			CG	dsDNA
GCA_000843605.1_ViralProj14379	Duplodnaviria	Heunggongvirae	Uroviricota	Caudoviricetes				Ryyoungvirus	NA	Ryyoungvirus bcepC6B	Burkholderia phage BcepC6B			CG	dsDNA
GCA_000843785.1_ViralProj14416	Duplodnaviria	Heunggongvirae	Uroviricota	Caudoviricetes		Straboviridae		Schizotequatrovirus	NA	Schizotequatrovirus KVP40	Vibrio phage KVP40			CG	dsDNA
GCA_000844065.1_ViralProj14473	Duplodnaviria	Heunggongvirae	Uroviricota	Caudoviricetes				Enhodamvirus	NA	Enhodamvirus VP2	Vibrio phage VP2			CG	dsDNA
GCA_000844165.1_ViralProj14493	Duplodnaviria	Heunggongvirae	Uroviricota	Caudoviricetes				Punavirus	NA	Punavirus P1	Escherichia phage P1			CG	dsDNA
GCA_000844345.1_ViralProj14542	Duplodnaviria	Heunggongvirae	Uroviricota	Caudoviricetes				Beetrevirus	NA	Beetrevirus B3	Pseudomonas phage B3			CG	dsDNA
GCA_000844445.1_ViralProj14382	Duplodnaviria	Heunggongvirae	Uroviricota	Caudoviricetes				Enhodamvirus	NA	Enhodamvirus VP5	Vibrio phage VP5			CG	dsDNA
GCA_000844485.1_ViralProj14391	Duplodnaviria	Heunggongvirae	Uroviricota	Caudoviricetes				Myxoctovirus	NA	Myxoctovirus Mx8	Myxococcus phage Mx8			CG	dsDNA
GCA_000844585.1_ViralProj14411	Duplodnaviria	Heunggongvirae	Uroviricota	Caudoviricetes				Naesvirus	NA	Naesvirus bcep43	Burkholderia phage Bcep43			CG	dsDNA
GCA_000844605.1_ViralProj14415	Duplodnaviria	Heunggongvirae	Uroviricota	Caudoviricetes		Peduoviridae		Citexvirus	NA	Citexvirus phiCTX	Pseudomonas phage phiCTX			CG	dsDNA
GCA_000845025.2_ViralProj14500	Duplodnaviria	Heunggongvirae	Uroviricota	Caudoviricetes				Detrevirus	NA	Detrevirus D3	Pseudomonas phage D3			CG	dsDNA
GCA_000845425.1_ViralProj14405	Duplodnaviria	Heunggongvirae	Uroviricota	Caudoviricetes				Naesvirus	NA	Naesvirus bcep781	Burkholderia phage Bcep781			CG	dsDNA
GCA_000845445.1_ViralProj14409	Duplodnaviria	Heunggongvirae	Uroviricota	Caudoviricetes				Naesvirus	NA	Naesvirus bcep1	Burkholderia phage Bcep1			CG	dsDNA
GCA_000845765.1_ViralProj14478	Duplodnaviria	Heunggongvirae	Uroviricota	Caudoviricetes				Lederbergvirus	NA	Lederbergvirus P22	Salmonella phage P22			CG	dsDNA
GCA_000846045.1_ViralProj14547	Duplodnaviria	Heunggongvirae	Uroviricota	Caudoviricetes		Herelleviridae		Salchichonvirus	NA	Salchichonvirus LP65	Lactobacillus phage LP65			CG	dsDNA
GCA_000846305.1_ViralProj14410	Duplodnaviria	Heunggongvirae	Uroviricota	Caudoviricetes				Stanholtvirus	NA	Burkholderia virus phi1026b	Burkholderia phage phi1026b			CG	dsDNA
GCA_000846625.1_ViralProj14475	Duplodnaviria	Heunggongvirae	Uroviricota	Caudoviricetes				Fattrevirus	NA	Fattrevirus AT3	Lactobacillus phage PhiAT3			CG	dsDNA
GCA_000846925.1_ViralProj14548	Duplodnaviria	Heunggongvirae	Uroviricota	Caudoviricetes				Jarrellvirus	NA	Jarrellvirus BCAJ1	Bacillus phage BCASJ1c			CG	dsDNA
GCA_000848025.1_ViralProj14602	Duplodnaviria	Heunggongvirae	Uroviricota	Caudoviricetes				Ashduovirus	NA	Ashduovirus A2	Lactobacillus phage A2			CG	dsDNA
GCA_000848045.2_ViralProj14606	Duplodnaviria	Heunggongvirae	Uroviricota	Caudoviricetes				Lomovskayavirus	NA	Streptomyces virus phiC31	Streptomyces phage phi-C31			CG	dsDNA
GCA_000848825.1_ViralProj14592	Duplodnaviria	Heunggongvirae	Uroviricota	Caudoviricetes			Hendrixvirinae	Byrnievirus	NA	Byrnievirus HK97	Escherichia phage HK97
GCA_000849625.1_ViralProj14584	Duplodnaviria	Heunggongvirae	Uroviricota	Caudoviricetes		Salasmaviridae		Cepunavirus	NA	Cepunavirus Cp1	Streptococcus phage Cp1			CG	dsDNA
GCA_000849825.2_ViralProj14628	Duplodnaviria	Heunggongvirae	Uroviricota	Caudoviricetes		Autographiviridae		Tiilvirus	NA	Tiilvirus P60	Synechococcus phage P60			CG	dsDNA
GCA_000857445.1_ViralProj15223	Duplodnaviria	Heunggongvirae	Uroviricota	Caudoviricetes		Kyanoviridae		Nodensvirus	NA	Nodensvirus spm2	Bacteriophage S-PM2			CG	dsDNA
GCA_000857585.1_ViralProj15255	Duplodnaviria	Heunggongvirae	Uroviricota	Caudoviricetes				Alachuavirus	NA	Alachuavirus Xp15	Xanthomonas phage Xp15			CG	dsDNA
GCA_000857625.1_ViralProj15264	Duplodnaviria	Heunggongvirae	Uroviricota	Caudoviricetes			Azeredovirinae	Phietavirus	NA	Phietavirus pv187	Staphylococcus phage 187			CG	dsDNA
GCA_000857645.1_ViralProj15268	Duplodnaviria	Heunggongvirae	Uroviricota	Caudoviricetes				Triavirus	NA	Staphylococcus virus 42e	Staphylococcus phage 42e			CG	dsDNA
GCA_000857665.1_ViralProj15272	Duplodnaviria	Heunggongvirae	Uroviricota	Caudoviricetes			Azeredovirinae	Phietavirus	NA	Phietavirus EW	Staphylococcus phage EW			CG	dsDNA
GCA_000857985.1_ViralProj15136	Duplodnaviria	Heunggongvirae	Uroviricota	Caudoviricetes		Kyanoviridae		Ronodorvirus	NA	Ronodorvirus ssm4	Prochlorococcus phage P-SSM4			CG	dsDNA
GCA_000858305.1_ViralProj15202	Duplodnaviria	Heunggongvirae	Uroviricota	Caudoviricetes		Salasmaviridae	Tatarstanvirinae	Gaunavirus	NA	Gaunavirus GA1	Bacillus phage GA-1			CG	dsDNA
GCA_000858505.1_ViralProj15246	Duplodnaviria	Heunggongvirae	Uroviricota	Caudoviricetes		Herelleviridae	Twortvirinae	Twortvirus	NA	Twortvirus twort	Staphylococcus phage Twort			CG	dsDNA
GCA_000858605.1_ViralProj15267	Duplodnaviria	Heunggongvirae	Uroviricota	Caudoviricetes				Fibralongavirus	NA	Fibralongavirus fv2638A	Staphylococcus phage 2638A			CG	dsDNA
GCA_000858745.1_ViralProj15134	Duplodnaviria	Heunggongvirae	Uroviricota	Caudoviricetes		Autographiviridae		Tiamatvirus	NA	Tiamatvirus PSSP7	Prochlorococcus phage P-SSP7			CG	dsDNA
GCA_000859345.1_ViralProj15261	Duplodnaviria	Heunggongvirae	Uroviricota	Caudoviricetes		Herelleviridae	Twortvirinae	Kayvirus	NA	Kayvirus G1	Staphylococcus phage G1			CG	dsDNA
GCA_000859385.1_ViralProj15269	Duplodnaviria	Heunggongvirae	Uroviricota	Caudoviricetes				Triavirus	NA	Staphylococcus virus 3a	Staphylococcus phage 3A			CG	dsDNA
GCA_000859545.1_ViralProj15127	Duplodnaviria	Heunggongvirae	Uroviricota	Caudoviricetes				Hollowayvirus	NA	Hollowayvirus F116	Pseudomonas phage F116			CG	dsDNA
GCA_000859585.1_ViralProj15135	Duplodnaviria	Heunggongvirae	Uroviricota	Caudoviricetes		Kyanoviridae		Salacisavirus	NA	Salacisavirus pssm2	Prochlorococcus phage P-SSM2			CG	dsDNA
GCA_000859685.1_ViralProj15156	Duplodnaviria	Heunggongvirae	Uroviricota	Caudoviricetes				Coetzeevirus	NA	Coetzeevirus JL1	Lactobacillus phage phiJL-1			CG	dsDNA
GCA_000859725.1_ViralProj15164	Varidnaviria	Bamfordvirae	Preplasmiviricota	Tectiliviricetes	Kalamavirales	Tectiviridae		Betatectivirus	NA	Bacillus virus GIL16	Bacillus phage GIL16c			CG	dsDNA
GCA_000860205.1_ViralProj15266	Duplodnaviria	Heunggongvirae	Uroviricota	Caudoviricetes			Azeredovirinae	Dubowvirus	NA	Dubowvirus dv53	Staphylococcus phage 53			CG	dsDNA
GCA_000860225.1_ViralProj15270	Duplodnaviria	Heunggongvirae	Uroviricota	Caudoviricetes				Triavirus	NA	Staphylococcus virus 47	Staphylococcus phage 47			CG	dsDNA
GCA_000860325.1_ViralProj15271	Duplodnaviria	Heunggongvirae	Uroviricota	Caudoviricetes			Azeredovirinae	Phietavirus	NA	Phietavirus pv37	Staphylococcus phage 37			CG	dsDNA
GCA_000861045.1_ViralProj15422	Duplodnaviria	Heunggongvirae	Uroviricota	Caudoviricetes		Peduoviridae		Tigrvirus	NA	Tigrvirus phi52237	Burkholderia pseudomallei phage phi52237			CG	dsDNA
GCA_000864205.1_ViralProj16076	Duplodnaviria	Heunggongvirae	Uroviricota	Caudoviricetes		Mesyanzhinovviridae		Keylargovirus	NA	Keylargovirus JL001	Alphaproteobacteria phage phiJl001			CG	dsDNA
GCA_000864445.1_ViralProj16329	Duplodnaviria	Heunggongvirae	Uroviricota	Caudoviricetes				Wbetavirus	NA	Bacillus virus Wbeta	Bacillus phage Wbeta			CG	dsDNA
GCA_000864505.1_ViralProj16384	Duplodnaviria	Heunggongvirae	Uroviricota	Caudoviricetes				Septimatrevirus	NA	Pseudomonas virus 73	Pseudomonas phage 73			CG	dsDNA
GCA_000864625.1_ViralProj16662	Duplodnaviria	Heunggongvirae	Uroviricota	Caudoviricetes				Lubbockvirus	NA	Lubbockvirus CD119	Clostridium phage phi CD119			CG	dsDNA
GCA_000864645.1_ViralProj15449	Duplodnaviria	Heunggongvirae	Uroviricota	Caudoviricetes		Autographiviridae	Studiervirinae	Chatterjeevirus	NA	Chatterjeevirus VP4	Vibrio phage VP4			CG	dsDNA
GCA_000865245.1_ViralProj16178	Duplodnaviria	Heunggongvirae	Uroviricota	Caudoviricetes		Drexlerviridae	Braunvirinae	Rtpvirus	NA	Rtpvirus Rtp	Escherichia phage Rtp			CG	dsDNA
GCA_000865365.1_ViralProj16300	Duplodnaviria	Heunggongvirae	Uroviricota	Caudoviricetes			Kantovirinae	Tsukubavirus	NA	Tsukubavirus OP2	Xanthomonas phage OP2			CG	dsDNA
GCA_000865485.1_ViralProj16387	Duplodnaviria	Heunggongvirae	Uroviricota	Caudoviricetes		Mesyanzhinovviridae	Rabinowitzvirinae	Yuavirus	NA	Pseudomonas virus M6	Pseudomonas phage M6			CG	dsDNA
GCA_000866045.1_ViralProj16228	Duplodnaviria	Heunggongvirae	Uroviricota	Caudoviricetes		Autographiviridae	Molineuxvirinae	Vectrevirus	NA	Vectrevirus K1E	Enterobacteria phage K1E			CG	dsDNA
GCA_000866205.1_ViralProj16381	Duplodnaviria	Heunggongvirae	Uroviricota	Caudoviricetes				Uetakevirus	NA	Uetakevirus phiV10	Escherichia phage phiV10			CG	dsDNA
GCA_000866745.1_ViralProj16114	Duplodnaviria	Heunggongvirae	Uroviricota	Caudoviricetes				Lacnuvirus	NA	Lactobacillus virus LcNu	Lactobacillus phage Lc-Nu			CG	dsDNA
GCA_000866825.1_ViralProj16199	Duplodnaviria	Heunggongvirae	Uroviricota	Caudoviricetes				Elvirus	NA	Elvirus EL	Pseudomonas phage EL			CG	dsDNA
GCA_000866925.1_ViralProj16299	Duplodnaviria	Heunggongvirae	Uroviricota	Caudoviricetes				Xipdecavirus	NA	Xanthomonas virus OP1	Xanthomonas phage OP1			CG	dsDNA
GCA_000867045.1_ViralProj16386	Duplodnaviria	Heunggongvirae	Uroviricota	Caudoviricetes		Zobellviridae		Paundecimvirus	NA	Pseudomonas virus PA11	Pseudomonas phage PA11			CG	dsDNA
GCA_000867345.1_ViralProj17103	Duplodnaviria	Heunggongvirae	Uroviricota	Caudoviricetes		Peduoviridae		Baylorvirus	NA	Baylorvirus PHL101	Mannheimia phage PHL101			CG	dsDNA
GCA_000867625.1_ViralProj17743	Duplodnaviria	Heunggongvirae	Uroviricota	Caudoviricetes				Wumpquatrovirus	NA	Wumpquatrovirus WMP4	Phormidium phage WMP4			CG	dsDNA
GCA_000867645.1_ViralProj17775	Duplodnaviria	Heunggongvirae	Uroviricota	Caudoviricetes				Svunavirus	NA	Svunavirus GBSV1	Geobacillus phage GBSV1			CG	dsDNA
GCA_000867865.1_ViralProj18511	Duplodnaviria	Heunggongvirae	Uroviricota	Caudoviricetes		Schitoviridae	Enquartavirinae	Enquatrovirus	NA	Enquatrovirus N4	Escherichia phage N4			CG	dsDNA
GCA_000867885.1_ViralProj18521	Duplodnaviria	Heunggongvirae	Uroviricota	Caudoviricetes				Casadabanvirus	NA	Casadabanvirus DMS3	Pseudomonas phage DMS3			CG	dsDNA
GCA_000867985.1_ViralProj18839	Duplodnaviria	Heunggongvirae	Uroviricota	Caudoviricetes		Autographiviridae	Molineuxvirinae	Eracentumvirus	NA	Eracentumvirus era103	Erwinia phage Era103			CG	dsDNA
GCA_000868005.1_ViralProj18851	Duplodnaviria	Heunggongvirae	Uroviricota	Caudoviricetes				Hapunavirus	NA	Hapunavirus VP882	Vibrio phage VP882			CG	dsDNA
GCA_000868265.2_ViralProj17147	Duplodnaviria	Heunggongvirae	Uroviricota	Caudoviricetes			Gclasvirinae	Liefievirus	NA	Mycobacterium virus Halo	Mycobacterium phage Halo			CG	dsDNA
GCA_000868285.1_ViralProj17167	Duplodnaviria	Heunggongvirae	Uroviricota	Caudoviricetes			Dclasvirinae	Plotvirus	NA	Plotvirus plot	Mycobacterium phage Plot			CG	dsDNA
GCA_000868305.2_ViralProj17175	Duplodnaviria	Heunggongvirae	Uroviricota	Caudoviricetes		Vilmaviridae		Wildcatvirus	NA	Mycobacterium virus Wildcat	Mycobacterium phage Wildcat			CG	dsDNA
GCA_000868485.1_ViralProj17757	Duplodnaviria	Heunggongvirae	Uroviricota	Caudoviricetes				Skunavirus	NA	Lactococcus virus 712	Lactococcus phage 712			CG	dsDNA
GCA_000868705.1_ViralProj18481	Duplodnaviria	Heunggongvirae	Uroviricota	Caudoviricetes		Autographiviridae	Studiervirinae	Berlinvirus	NA	Berlinvirus berlin	Yersinia phage Berlin			CG	dsDNA
GCA_000868745.1_ViralProj18523	Duplodnaviria	Heunggongvirae	Uroviricota	Caudoviricetes				Rockefellervirus	NA	Staphylococcus virus CNPH82	Staphylococcus phage CNPH82			CG	dsDNA
GCA_000869145.1_ViralProj17115	Duplodnaviria	Heunggongvirae	Uroviricota	Caudoviricetes				Kostyavirus	NA	Mycobacterium virus 244	Mycobacterium phage 244			CG	dsDNA
GCA_000869785.1_ViralProj17059	Duplodnaviria	Heunggongvirae	Uroviricota	Caudoviricetes		Autographiviridae	Molineuxvirinae	Vectrevirus	NA	Vectrevirus K15	Escherichia phage K1-5			CG	dsDNA
GCA_000869825.1_ViralProj17113	Duplodnaviria	Heunggongvirae	Uroviricota	Caudoviricetes		Peduoviridae		Irtavirus	NA	Irtavirus F108	Pasteurella phage F108			CG	dsDNA
GCA_000870005.1_ViralProj17541	Duplodnaviria	Heunggongvirae	Uroviricota	Caudoviricetes		Kyanoviridae		Ormenosvirus	NA	Ormenosvirus syn9	Synechococcus phage syn9			CG	dsDNA
GCA_000870085.1_ViralProj17739	Duplodnaviria	Heunggongvirae	Uroviricota	Caudoviricetes				Questintvirus	NA	Lactococcus virus Q54	Lactococcus phage Q54			CG	dsDNA
GCA_000870225.1_ViralProj18127	Duplodnaviria	Heunggongvirae	Uroviricota	Caudoviricetes				Fukuivirus	NA	Fukuivirus LMM01	Microcystis phage Ma-LMM01			CG	dsDNA
GCA_000870565.1_ViralProj19153	Duplodnaviria	Heunggongvirae	Uroviricota	Caudoviricetes				Yongloolinvirus	NA	Yongloolinvirus C2	Clostridium phage phiC2			CG	dsDNA
GCA_000870585.1_ViralProj19163	Duplodnaviria	Heunggongvirae	Uroviricota	Caudoviricetes		Peduoviridae		Tigrvirus	NA	Tigrvirus E202	Burkholderia phage phiE202			CG	dsDNA
GCA_000871085.1_ViralProj20765	Duplodnaviria	Heunggongvirae	Uroviricota	Caudoviricetes				Oshimavirus	NA	Thermus virus P23-45	Thermus phage P23-45			CG	dsDNA
GCA_000871125.1_ViralProj20793	Duplodnaviria	Heunggongvirae	Uroviricota	Caudoviricetes		Herelleviridae	Jasinkavirinae	Pecentumvirus	NA	Pecentumvirus A511	Listeria phage A511			CG	dsDNA
GCA_000871185.1_ViralProj20945	Duplodnaviria	Heunggongvirae	Uroviricota	Caudoviricetes				Fromanvirus	NA	Fromanvirus bethlehem	Mycobacterium phage Bethlehem			CG	dsDNA
GCA_000871345.1_ViralProj27979	Duplodnaviria	Heunggongvirae	Uroviricota	Caudoviricetes		Chaseviridae	Cleopatravirinae	Carltongylesvirus	NA	Carltongylesvirus GJ1	Escherichia phage phiEcoM-GJ1			CG	dsDNA
GCA_000871505.1_ViralProj19161	Duplodnaviria	Heunggongvirae	Uroviricota	Caudoviricetes		Peduoviridae		Duodecimduovirus	NA	Duodecimduovirus phiE122	Burkholderia phage phiE12-2			CG	dsDNA
GCA_000871945.1_ViralProj20767	Duplodnaviria	Heunggongvirae	Uroviricota	Caudoviricetes				Oshimavirus	NA	Thermus virus P74-26	Thermus phage P74-26			CG	dsDNA
GCA_000871985.1_ViralProj20795	Duplodnaviria	Heunggongvirae	Uroviricota	Caudoviricetes			Trabyvirinae	Jelitavirus	NA	Jelitavirus B025	Listreria phage B025			CG	dsDNA
GCA_000872105.1_ViralProj21009	Duplodnaviria	Heunggongvirae	Uroviricota	Caudoviricetes		Herelleviridae	Brockvirinae	Kochikohdavirus	NA	Kochikohdavirus EF24C	Enterococcus phage EF24C			CG	dsDNA
GCA_000872125.1_ViralProj21045	Duplodnaviria	Heunggongvirae	Uroviricota	Caudoviricetes		Autographiviridae	Krylovirinae	Stubburvirus	NA	Stubburvirus LKA1	Pseudomonas phage LKA1			CG	dsDNA
GCA_000872185.1_ViralProj27907	Duplodnaviria	Heunggongvirae	Uroviricota	Caudoviricetes				Gilesvirus	NA	Gilesvirus giles	Mycobacterium phage Giles			CG	dsDNA
GCA_000872765.1_ViralProj29143	Duplodnaviria	Heunggongvirae	Uroviricota	Caudoviricetes			Sepvirinae	Traversvirus	NA	Traversvirus min27	Escherichia phage Min27			CG	dsDNA
GCA_000872825.1_ViralProj29287	Duplodnaviria	Heunggongvirae	Uroviricota	Caudoviricetes		Demerecviridae	Markadamsvirinae	Epseptimavirus	NA	Epseptimavirus EPS7	Escherichia phage EPS7			CG	dsDNA
GCA_000873005.1_ViralProj18857	Duplodnaviria	Heunggongvirae	Uroviricota	Caudoviricetes				Bcepfunavirus	NA	Bcepfunavirus bcepF1	Burkholderia phage BcepF1			CG	dsDNA
GCA_000873105.1_ViralProj19165	Duplodnaviria	Heunggongvirae	Uroviricota	Caudoviricetes				Bcepmuvirus	NA	Bcepmuvirus E255	Burkholderia phage phiE255			CG	dsDNA
GCA_000873125.1_ViralProj19481	Duplodnaviria	Heunggongvirae	Uroviricota	Caudoviricetes		Peduoviridae		Aresaunavirus	NA	Aresaunavirus RSA1	Ralstonia phage RSA1			CG	dsDNA
GCA_000873225.1_ViralProj19763	Duplodnaviria	Heunggongvirae	Uroviricota	Caudoviricetes		Autographiviridae		Voetvirus	NA	Voetvirus syn5	Synechococcus virus Syn5			CG	dsDNA
GCA_000873245.1_ViralProj19771	Duplodnaviria	Heunggongvirae	Uroviricota	Caudoviricetes				Xipdecavirus	NA	Xanthomonas virus Xop411	Xanthomonas phage Xop411			CG	dsDNA
GCA_000873445.1_ViralProj20397	Duplodnaviria	Heunggongvirae	Uroviricota	Caudoviricetes				Svunavirus	NA	Svunavirus sv1	Bacillus virus 1			CG	dsDNA
GCA_000873545.1_ViralProj20783	Duplodnaviria	Heunggongvirae	Uroviricota	Caudoviricetes				Chopinvirus	NA	Chopinvirus KSY1	Lactococcus lactis phage KSY1			CG	dsDNA
GCA_000873905.1_ViralProj19769	Duplodnaviria	Heunggongvirae	Uroviricota	Caudoviricetes		Peduoviridae		Bielevirus	NA	Bielevirus phiO18P	Aeromonas phage phiO18P			CG	dsDNA
GCA_000873965.1_ViralProj19801	Duplodnaviria	Heunggongvirae	Uroviricota	Caudoviricetes				Wumptrevirus	NA	Wumptrevirus WMP3	Phormidium phage Pf-WMP3			CG	dsDNA
GCA_000874045.1_ViralProj19961	Duplodnaviria	Heunggongvirae	Uroviricota	Caudoviricetes				Minunavirus	NA	Microbacterium virus Min1	Microbacterium phage Min1			CG	dsDNA
GCA_000874085.1_ViralProj20057	Duplodnaviria	Heunggongvirae	Uroviricota	Caudoviricetes				Dybvigvirus	NA	Dybvigvirus Av1	Actinomyces phage Av-1			CG	dsDNA
GCA_000874185.2_ViralProj20757	Duplodnaviria	Heunggongvirae	Uroviricota	Caudoviricetes				Sasvirus	NA	Corynebacterium virus BFK20	Corynebacterium phage BFK20			CG	dsDNA
GCA_000874205.1_ViralProj20781	Duplodnaviria	Heunggongvirae	Uroviricota	Caudoviricetes		Zierdtviridae	Toshachvirinae	Chunghsingvirus	NA	Corynebacterium virus P1201	Corynebacterium phage P1201			CG	dsDNA
GCA_000874225.1_ViralProj20789	Duplodnaviria	Heunggongvirae	Uroviricota	Caudoviricetes		Straboviridae		Krischvirus	NA	Krischvirus georgiaone	Escherichia phage Phi1			CG	dsDNA
GCA_000874625.1_ViralProj30599	Duplodnaviria	Heunggongvirae	Uroviricota	Caudoviricetes		Autographiviridae	Studiervirinae	Berlinvirus	NA	Berlinvirus BA14	Escherichia phage BA14			CG	dsDNA
GCA_000874645.1_ViralProj30611	Duplodnaviria	Heunggongvirae	Uroviricota	Caudoviricetes				Predatorvirus	NA	Mycobacterium virus Predator	Mycobacterium phage Predator			CG	dsDNA
GCA_000874785.1_ViralProj30965	Duplodnaviria	Heunggongvirae	Uroviricota	Caudoviricetes				Iodovirus	NA	Iodovirus PLPE	Iodobacter phage PhiPLPE			CG	dsDNA
GCA_000875025.1_ViralProj29079	Duplodnaviria	Heunggongvirae	Uroviricota	Caudoviricetes				Macdonaldcampvirus	NA	Macdonaldcampvirus ViIIE1	Salmonella phage Vi II-E1			CG	dsDNA
GCA_000875425.1_ViralProj30521	Duplodnaviria	Heunggongvirae	Uroviricota	Caudoviricetes				Pukovnikvirus	NA	Pukovnikvirus pukovnik	Mycobacterium phage Pukovnik			CG	dsDNA
GCA_000875445.1_ViralProj30601	Duplodnaviria	Heunggongvirae	Uroviricota	Caudoviricetes		Autographiviridae	Studiervirinae	Kayfunavirus	NA	Kayfunavirus EcoDS1	Escherichia phage EcoDS1			CG	dsDNA
GCA_000875585.1_ViralProj30879	Duplodnaviria	Heunggongvirae	Uroviricota	Caudoviricetes				Larmunavirus	NA	Lactobacillus virus Lrm1	Lactobacillus phage Lrm1			CG	dsDNA
GCA_000879135.1_ViralProj28763	Duplodnaviria	Heunggongvirae	Uroviricota	Caudoviricetes				Hapunavirus	NA	Hapunavirus HAP1	Halomonas phage phiHAP-1			CG	dsDNA
GCA_000879455.1_ViralProj30059	Duplodnaviria	Heunggongvirae	Uroviricota	Caudoviricetes				Mieseafarmvirus	NA	Mieseafarmvirus RSL1	Ralstonia phage phiRSL1			CG	dsDNA
GCA_000879735.1_ViralProj28739	Duplodnaviria	Heunggongvirae	Uroviricota	Caudoviricetes				Bruynoghevirus	NA	Bruynoghevirus LUZ24	Pseudomonas phage LUZ24			CG	dsDNA
GCA_000879895.1_ViralProj29283	Duplodnaviria	Heunggongvirae	Uroviricota	Caudoviricetes				Fremauxvirus	NA	Fremauxvirus fv1706	Lactococcus phage 1706			CG	dsDNA
GCA_000880255.1_ViralProj30603	Duplodnaviria	Heunggongvirae	Uroviricota	Caudoviricetes		Autographiviridae	Studiervirinae	Teseptimavirus	NA	Teseptimavirus 13a	Escherichia phage 13a			CG	dsDNA
GCA_000880275.1_ViralProj30615	Duplodnaviria	Heunggongvirae	Uroviricota	Caudoviricetes		Salasmaviridae	Picovirinae	Salasvirus	NA	Salasvirus phi29	Bacillus phage phi29			CG	dsDNA
GCA_000880295.1_ViralProj30693	Duplodnaviria	Heunggongvirae	Uroviricota	Caudoviricetes			Gracegardnervirinae	Cheoctovirus	NA	Mycobacterium virus Boomer	Mycobacterium phage Boomer			CG	dsDNA
GCA_000880475.1_ViralProj31279	Duplodnaviria	Heunggongvirae	Uroviricota	Caudoviricetes			Ceeclamvirinae	Myrnavirus	NA	Myrnavirus myrna	Mycobacterium phage Myrna			CG	dsDNA
GCA_000880575.1_ViralProj32005	Duplodnaviria	Heunggongvirae	Uroviricota	Caudoviricetes			Chebruvirinae	Brujitavirus	NA	Brujitavirus brujita	Mycobacterium phage Brujita			CG	dsDNA
GCA_000880595.1_ViralProj32013	Duplodnaviria	Heunggongvirae	Uroviricota	Caudoviricetes			Gracegardnervirinae	Cheoctovirus	NA	Cheoctovirus florinda	Mycobacterium phage Fruitloop			CG	dsDNA
GCA_000880675.1_ViralProj32213	Duplodnaviria	Heunggongvirae	Uroviricota	Caudoviricetes				Pankowvirus	NA	Escherichia virus 1717	Stx2-converting phage 1717			CG	dsDNA
GCA_000880955.1_ViralProj33139	Duplodnaviria	Heunggongvirae	Uroviricota	Caudoviricetes				Lwoffvirus	NA	Bacillus virus TP21	Bacillus phage TP21-L			CG	dsDNA
GCA_000881295.1_ViralProj37885	Duplodnaviria	Heunggongvirae	Uroviricota	Caudoviricetes		Autographiviridae		Maculvirus	NA	Maculvirus VP93	Vibrio phage VP93			CG	dsDNA
GCA_000881335.1_ViralProj38079	Duplodnaviria	Heunggongvirae	Uroviricota	Caudoviricetes		Schitoviridae	Rhodovirinae	Aorunvirus	NA	Aorunvirus EE36phi1	Sulfitobacter phage EE36phi1			CG	dsDNA
GCA_000881355.2_ViralProj30793	Duplodnaviria	Heunggongvirae	Uroviricota	Caudoviricetes		Autographiviridae	Studiervirinae	Minipunavirus	NA	Minipunavirus MmP1	Morganella phage MmP1			CG	dsDNA
GCA_000881435.1_ViralProj31057	Duplodnaviria	Heunggongvirae	Uroviricota	Caudoviricetes				Cecivirus	NA	Cecivirus IEBH	Bacillus phage IEBH			CG	dsDNA
GCA_000881655.1_ViralProj32323	Duplodnaviria	Heunggongvirae	Uroviricota	Caudoviricetes				Colneyvirus	NA	Colneyvirus CD27	Clostridium phage phiCD27			CG	dsDNA
GCA_000881675.1_ViralProj32379	Duplodnaviria	Heunggongvirae	Uroviricota	Caudoviricetes		Herelleviridae	Spounavirinae	Okubovirus	NA	Okubovirus SPO1	Bacillus phage SPO1			CG	dsDNA
GCA_000881695.1_ViralProj32599	Varidnaviria	Bamfordvirae	Preplasmiviricota	Tectiliviricetes	Kalamavirales	Tectiviridae		Betatectivirus	NA	Bacillus virus AP50	Bacillus phage AP50	BVAP50		CG	dsDNA
GCA_000881995.1_ViralProj33537	Duplodnaviria	Heunggongvirae	Uroviricota	Caudoviricetes			Ounavirinae	Kolesnikvirus	NA	Kolesnikvirus Ea214	Erwinia phage phiEa21-4			CG	dsDNA
GCA_000882195.1_ViralProj32015	Duplodnaviria	Heunggongvirae	Uroviricota	Caudoviricetes				Konstantinevirus	NA	Konstantinevirus konstantine	Mycobacterium phage Konstantine			CG	dsDNA
GCA_000882275.1_ViralProj32231	Duplodnaviria	Heunggongvirae	Uroviricota	Caudoviricetes				Pankowvirus	NA	Enterobacteria virus YYZ2008	Enterobacteria phage YYZ-2008			CG	dsDNA
GCA_000882295.1_ViralProj32321	Duplodnaviria	Heunggongvirae	Uroviricota	Caudoviricetes				Ceduovirus	NA	Ceduovirus bIL67	Lactococcus phage bIL67			CG	dsDNA
GCA_000882435.1_ViralProj32705	Duplodnaviria	Heunggongvirae	Uroviricota	Caudoviricetes				Sendosyvirus	NA	Sendosyvirus APSE2	Bacteriophage APSE-2			CG	dsDNA
GCA_000882895.1_ViralProj37887	Duplodnaviria	Heunggongvirae	Uroviricota	Caudoviricetes				Teubervirus	NA	Lactococcus virus P087	Lactococcus phage P087			CG	dsDNA
GCA_000882975.1_ViralProj38265	Duplodnaviria	Heunggongvirae	Uroviricota	Caudoviricetes		Straboviridae	Tevenvirinae	Dhakavirus	NA	Dhakavirus JS10	Escherichia phage JS10			CG	dsDNA
GCA_000882995.1_ViralProj38297	Duplodnaviria	Heunggongvirae	Uroviricota	Caudoviricetes				Lessievirus	NA	Lessievirus bcepil02	Burkholderia phage BcepIL02			CG	dsDNA
GCA_000883015.1_ViralProj31163	Duplodnaviria	Heunggongvirae	Uroviricota	Caudoviricetes		Autographiviridae	Okabevirinae	Higashivirus	NA	Higashivirus RSB1	Ralstonia phage RSB1			CG	dsDNA
GCA_000883715.1_ViralProj36611	Duplodnaviria	Heunggongvirae	Uroviricota	Caudoviricetes		Herelleviridae		Mooreparkvirus	NA	Mooreparkvirus Lb3381	Lactobacillus phage Lb338-1			CG	dsDNA
GCA_000884275.1_ViralProj40235	Varidnaviria	Helvetiavirae	Dividoviricota	Laserviricetes	Halopanivirales	Matshushitaviridae		Hukuchivirus	NA	Hukuchivirus P23-77	Thermus phage P23-77	P23-77		CG	dsDNA
GCA_000884555.1_ViralProj42787	Duplodnaviria	Heunggongvirae	Uroviricota	Caudoviricetes				Phifelvirus	NA	Enterococcus virus FL3	Enterococcus phage phiFL3A			CG	dsDNA
GCA_000884575.1_ViralProj42795	Duplodnaviria	Heunggongvirae	Uroviricota	Caudoviricetes				Phifelvirus	NA	Enterococcus virus FL2	Enterococcus phage phiFL2A			CG	dsDNA
GCA_000884615.1_ViralProj42949	Duplodnaviria	Heunggongvirae	Uroviricota	Caudoviricetes		Schitoviridae	Migulavirinae	Litunavirus	NA	Ithacavirus SP076	Pseudomonas phage LIT1			CG	dsDNA
GCA_000884875.1_ViralProj38267	Duplodnaviria	Heunggongvirae	Uroviricota	Caudoviricetes				Eisenstarkvirus	NA	Eisenstarkvirus L7	Xanthomonas phage phiL7			CG	dsDNA
GCA_000886175.1_ViralProj42789	Duplodnaviria	Heunggongvirae	Uroviricota	Caudoviricetes				Phifelvirus	NA	Enterococcus virus FL1	Enterococcus phage phiFL1A			CG	dsDNA
GCA_000886235.1_ViralProj42951	Duplodnaviria	Heunggongvirae	Uroviricota	Caudoviricetes		Schitoviridae	Migulavirinae	Luzseptimavirus	NA	Luzseptimavirus LUZ7	Pseudomonas phage LUZ7			CG	dsDNA
GCA_000886435.1_ViralProj38431	Duplodnaviria	Heunggongvirae	Uroviricota	Caudoviricetes			Bronfenbrennervirinae	Peeveelvirus	NA	Peeveelvirus CN125	Staphylococcus phage phiPVL-CN125			CG	dsDNA
GCA_000886695.1_ViralProj39923	Duplodnaviria	Heunggongvirae	Uroviricota	Caudoviricetes		Kyanoviridae		Gibbetvirus	NA	Gibbetvirus rsm4	Synechococcus phage S-RSM4			CG	dsDNA
GCA_000887015.1_ViralProj42785	Duplodnaviria	Heunggongvirae	Uroviricota	Caudoviricetes		Autographiviridae	Studiervirinae	Chatterjeevirus	NA	Chatterjeevirus N4	Vibriophage N4			CG	dsDNA
GCA_000887075.1_ViralProj42947	Duplodnaviria	Heunggongvirae	Uroviricota	Caudoviricetes				Cimpunavirus	NA	Cimpunavirus CMP1	Clavibacter phage CMP1			CG	dsDNA
GCA_000887155.1_ViralProj46607	Duplodnaviria	Heunggongvirae	Uroviricota	Caudoviricetes			Gracegardnervirinae	Cheoctovirus	NA	Mycobacterium virus Ardmore	Mycobacterium phage Ardmore			CG	dsDNA
GCA_000887175.1_ViralProj47333	Duplodnaviria	Heunggongvirae	Uroviricota	Caudoviricetes		Straboviridae		Slopekvirus	NA	Slopekvirus kp15	Klebsiella phage KP15			CG	dsDNA
GCA_000887715.1_ViralProj59729	Duplodnaviria	Heunggongvirae	Uroviricota	Caudoviricetes		Straboviridae		Chrysonvirus	NA	Chrysonvirus as5	Aeromonas phage phiAS5			CG	dsDNA
GCA_000887755.1_ViralProj60117	Duplodnaviria	Heunggongvirae	Uroviricota	Caudoviricetes		Straboviridae	Twarogvirinae	Lasallevirus	NA	Acinetobacter virus Acj61	Acinetobacter phage Acj61			CG	dsDNA
GCA_000888035.1_ViralProj42937	Duplodnaviria	Heunggongvirae	Uroviricota	Caudoviricetes		Ackermannviridae	Aglimvirinae	Agtrevirus	NA	Agtrevirus AG3	Shigella phage phiSboM-AG3			CG	dsDNA
GCA_000888055.1_ViralProj42945	Duplodnaviria	Heunggongvirae	Uroviricota	Caudoviricetes				Ionavirus	NA	Ionavirus W14	Delftia phage PhiW-14			CG	dsDNA
GCA_000888655.1_ViralProj56019	Duplodnaviria	Heunggongvirae	Uroviricota	Caudoviricetes		Straboviridae	Tevenvirinae	Gaprivervirus	NA	Gaprivervirus sp18	Shigella phage SP18			CG	dsDNA
GCA_000888755.1_ViralProj60121	Duplodnaviria	Heunggongvirae	Uroviricota	Caudoviricetes		Straboviridae	Twarogvirinae	Acajnonavirus	NA	Acajnonavirus acj9	Acinetobacter phage Acj9			CG	dsDNA
GCA_000889095.1_ViralProj50177	Duplodnaviria	Heunggongvirae	Uroviricota	Caudoviricetes		Straboviridae	Tevenvirinae	Dhakavirus	NA	Dhakavirus ime08	Escherichia phage IME08			CG	dsDNA
GCA_000889435.1_ViralProj60119	Duplodnaviria	Heunggongvirae	Uroviricota	Caudoviricetes		Straboviridae	Tevenvirinae	Karamvirus	NA	Karamvirus cc31	Enterobacter phage CC31			CG	dsDNA
GCA_000890095.1_ViralProj51673	Duplodnaviria	Heunggongvirae	Uroviricota	Caudoviricetes		Vilmaviridae	Lclasvirinae	Bronvirus	NA	Mycobacterium virus Bron	Mycobacterium phage LeBron			CG	dsDNA
GCA_000890635.1_ViralProj62963	Duplodnaviria	Heunggongvirae	Uroviricota	Caudoviricetes		Autographiviridae	Studiervirinae	Przondovirus	NA	Przondovirus K11	Klebsiella phage K11			CG	dsDNA
GCA_000890655.1_ViralProj63231	Duplodnaviria	Heunggongvirae	Uroviricota	Caudoviricetes		Zobellviridae		Icepovirus	NA	Vibrio virus ICP2	Vibrio phage ICP2			CG	dsDNA
GCA_000890755.1_ViralProj64559	Duplodnaviria	Heunggongvirae	Uroviricota	Caudoviricetes				Audreyjarvisvirus	NA	Audreyjarvisvirus av949	Lactococcus phage 949			CG	dsDNA
GCA_000890815.1_ViralProj64695	Duplodnaviria	Heunggongvirae	Uroviricota	Caudoviricetes		Kyanoviridae		Nilusvirus	NA	Nilusvirus ssm2	Synechococcus phage S-SM2			CG	dsDNA
GCA_000890855.1_ViralProj64711	Duplodnaviria	Heunggongvirae	Uroviricota	Caudoviricetes		Kyanoviridae		Lipsvirus	NA	Lipsvirus ssm7	Synechococcus phage S-SSM7			CG	dsDNA
GCA_000891135.1_ViralProj67249	Duplodnaviria	Heunggongvirae	Uroviricota	Caudoviricetes				Leicestervirus	NA	Clostridioides virus phiCD38-2	Clostridium phage phiCD38-2			CG	dsDNA
GCA_000891215.1_ViralProj68413	Duplodnaviria	Heunggongvirae	Uroviricota	Caudoviricetes		Autographiviridae	Studiervirinae	Przondovirus	NA	Przondovirus K30	Escherichia phage K30			CG	dsDNA
GCA_000891635.1_ViralProj63435	Duplodnaviria	Heunggongvirae	Uroviricota	Caudoviricetes		Autographiviridae	Studiervirinae	Troedvirus	NA	Troedvirus Phi15	Pseudomonas phage phi15			CG	dsDNA
GCA_000891735.1_ViralProj64563	Duplodnaviria	Heunggongvirae	Uroviricota	Caudoviricetes		Peduoviridae		Kisquinquevirus	NA	Kisquinquevirus KS5	Burkholderia phage KS5			CG	dsDNA
GCA_000891775.1_ViralProj64613	Duplodnaviria	Heunggongvirae	Uroviricota	Caudoviricetes		Peduoviridae		Kisquattuordecimvirus	NA	Kisquattuordecimvirus KS14	Burkholderia phage KS14			CG	dsDNA
GCA_000891795.1_ViralProj64699	Duplodnaviria	Heunggongvirae	Uroviricota	Caudoviricetes		Kyanoviridae		Ahtivirus	NA	Ahtivirus sagseatwo	Synechococcus phage S-ShM2			CG	dsDNA
GCA_000891815.1_ViralProj64707	Duplodnaviria	Heunggongvirae	Uroviricota	Caudoviricetes		Kyanoviridae		Brizovirus	NA	Brizovirus syn33	Prochlorococcus phage Syn33			CG	dsDNA
GCA_000891835.1_ViralProj64715	Duplodnaviria	Heunggongvirae	Uroviricota	Caudoviricetes		Kyanoviridae		Glaucusvirus	NA	Glaucusvirus ssm5	Synechococcus phage S-SSM5			CG	dsDNA
GCA_000892115.1_ViralProj67415	Duplodnaviria	Heunggongvirae	Uroviricota	Caudoviricetes		Vilmaviridae	Lclasvirinae	Faithunavirus	NA	Faithunavirus faith1	Mycobacterium phage Faith1			CG	dsDNA
GCA_000892295.1_ViralProj63233	Duplodnaviria	Heunggongvirae	Uroviricota	Caudoviricetes		Autographiviridae	Studiervirinae	Chatterjeevirus	NA	Chatterjeevirus ICP3	Vibrio phage ICP3			CG	dsDNA
GCA_000892355.1_ViralProj64539	Duplodnaviria	Heunggongvirae	Uroviricota	Caudoviricetes		Autographiviridae	Studiervirinae	Berlinvirus	NA	Berlinvirus 285P	Escherichia phage 285P			CG	dsDNA
GCA_000892375.1_ViralProj64547	Duplodnaviria	Heunggongvirae	Uroviricota	Caudoviricetes		Herelleviridae			NA	Brochothrix virus A9	Brochothrix phage A9			CG	dsDNA
GCA_000892395.1_ViralProj64561	Duplodnaviria	Heunggongvirae	Uroviricota	Caudoviricetes		Autographiviridae	Studiervirinae	Pifdecavirus	NA	Pifdecavirus IBBPF7A	Pseudomonas phage phiIBB-PF7A			CG	dsDNA
GCA_000892435.1_ViralProj64611	Duplodnaviria	Heunggongvirae	Uroviricota	Caudoviricetes				Nankokuvirus	NA	Nankokuvirus KPP10	Pseudomonas phage KPP10			CG	dsDNA
GCA_000892455.1_ViralProj64697	Duplodnaviria	Heunggongvirae	Uroviricota	Caudoviricetes				Eurybiavirus	NA	Eurybiavirus PHM1	Prochlorococcus phage P-HM1			CG	dsDNA
GCA_000892475.1_ViralProj64705	Duplodnaviria	Heunggongvirae	Uroviricota	Caudoviricetes				Eurybiavirus	NA	Eurybiavirus PHM2	Prochlorococcus phage P-HM1			CG	dsDNA
GCA_000892495.1_ViralProj64713	Duplodnaviria	Heunggongvirae	Uroviricota	Caudoviricetes		Kyanoviridae		Vellamovirus	NA	Vellamovirus syn1	Prochlorococcus phage Syn1			CG	dsDNA
GCA_000892675.1_ViralProj66399	Duplodnaviria	Heunggongvirae	Uroviricota	Caudoviricetes				Xiamenvirus	NA	Roseobacter virus RDJL1	Roseobacter phage RDJL Phi 1			CG	dsDNA
GCA_000892855.1_ViralProj68415	Duplodnaviria	Heunggongvirae	Uroviricota	Caudoviricetes				Emalynvirus	NA	Emalynvirus GTE2	Gordonia phage GTE2			CG	dsDNA
GCA_000893155.1_ViralProj62941	Duplodnaviria	Heunggongvirae	Uroviricota	Caudoviricetes				Stanholtvirus	NA	Burkholderia virus phi6442	Burkholderia phage phi644-2			CG	dsDNA
GCA_000893255.1_ViralProj64543	Duplodnaviria	Heunggongvirae	Uroviricota	Caudoviricetes		Straboviridae	Emmerichvirinae	Ishigurovirus	NA	Ishigurovirus osborne	Aeromonas phage 65			CG	dsDNA
GCA_000893295.1_ViralProj64565	Duplodnaviria	Heunggongvirae	Uroviricota	Caudoviricetes		Peduoviridae		Kayeltresvirus	NA	Kayeltresvirus KL3	Burkholderia phage KL3			CG	dsDNA
GCA_000893355.1_ViralProj64701	Duplodnaviria	Heunggongvirae	Uroviricota	Caudoviricetes		Kyanoviridae		Thetisvirus	NA	Thetisvirus ssm1	Synechococcus phage S-SM1			CG	dsDNA
GCA_000893375.1_ViralProj64709	Duplodnaviria	Heunggongvirae	Uroviricota	Caudoviricetes		Kyanoviridae		Pontusvirus	NA	Pontusvirus syn19	Synechococcus phage Syn19			CG	dsDNA
GCA_000893395.1_ViralProj64717	Duplodnaviria	Heunggongvirae	Uroviricota	Caudoviricetes		Kyanoviridae		Palaemonvirus	NA	Prochlorococcus virus PSSM7	Prochlorococcus phage P-SSM7			CG	dsDNA
GCA_000893675.1_ViralProj67417	Duplodnaviria	Heunggongvirae	Uroviricota	Caudoviricetes		Autographiviridae		Waewaevirus	NA	Waewaevirus limezero	Pantoea phage Limezero			CG	dsDNA
GCA_000893935.1_ViralProj74359	Duplodnaviria	Heunggongvirae	Uroviricota	Caudoviricetes			Vequintavirinae	Seunavirus	NA	Seunavirus PVPSE1	Salmonella phage PVPSE1			CG	dsDNA
GCA_000894035.1_ViralProj76745	Duplodnaviria	Heunggongvirae	Uroviricota	Caudoviricetes				Getseptimavirus	NA	Getseptimavirus GTE7	Gordonia phage GTE7			CG	dsDNA
GCA_000894075.1_ViralProj78693	Duplodnaviria	Heunggongvirae	Uroviricota	Caudoviricetes		Zierdtviridae	Petrovskivirinae	Gruunavirus	NA	Gruunavirus GTE5	Gordonia phage GTE5			CG	dsDNA
GCA_000894235.1_ViralProj81167	Duplodnaviria	Heunggongvirae	Uroviricota	Caudoviricetes				Rerduovirus	NA	Rhodococcus virus RGL3	Rhodococcus phage RGL3			CG	dsDNA
GCA_000894275.1_ViralProj81183	Duplodnaviria	Heunggongvirae	Uroviricota	Caudoviricetes		Autographiviridae		Cheungvirus	NA	Cheungvirus NATL1A7	Cyanophage NATL1A-7			CG	dsDNA
GCA_000894655.1_ViralProj167572	Duplodnaviria	Heunggongvirae	Uroviricota	Caudoviricetes		Demerecviridae	Markadamsvirinae	Tequintavirus	NA	Tequintavirus AKFV33	Escherichia phage vB_EcoS_AKFV33			CG	dsDNA
GCA_000894715.1_ViralProj167658	Duplodnaviria	Heunggongvirae	Uroviricota	Caudoviricetes			Vequintavirinae	Certrevirus	NA	Certrevirus CR3	Cronobacter phage CR3			CG	dsDNA
GCA_000894975.1_ViralProj76733	Duplodnaviria	Heunggongvirae	Uroviricota	Caudoviricetes			Hendrixvirinae	Saikungvirus	NA	Saikungvirus HK75	Escherichia phage HK75			CG	dsDNA
GCA_000895115.1_ViralProj80911	Duplodnaviria	Heunggongvirae	Uroviricota	Caudoviricetes			Eucampyvirinae	Fletchervirus	NA	Fletchervirus CPX	Campylobacter phage CPX			CG	dsDNA
GCA_000895135.1_ViralProj80919	Duplodnaviria	Heunggongvirae	Uroviricota	Caudoviricetes				Dhillonvirus	NA	Dhillonvirus EP23	Shigella phage EP23			CG	dsDNA
GCA_000895155.1_ViralProj81001	Duplodnaviria	Heunggongvirae	Uroviricota	Caudoviricetes		Ackermannviridae	Cvivirinae	Kuttervirus	NA	Kuttervirus CBA120	Escherichia phage CBA120			CG	dsDNA
GCA_000895235.1_ViralProj81179	Duplodnaviria	Heunggongvirae	Uroviricota	Caudoviricetes		Autographiviridae		Tritonvirus	NA	Tritonvirus PSSP2	Cyanophage P-SSP2			CG	dsDNA
GCA_000895275.1_ViralProj82639	Duplodnaviria	Heunggongvirae	Uroviricota	Caudoviricetes				Uetakevirus	NA	Uetakevirus SPN1S	Salmonella phage SPN1S			CG	dsDNA
GCA_000895295.1_ViralProj82649	Duplodnaviria	Heunggongvirae	Uroviricota	Caudoviricetes				Detrevirus	NA	Detrevirus PMG1	Pseudomonas phage PMG1			CG	dsDNA
GCA_000895875.1_ViralProj81185	Duplodnaviria	Heunggongvirae	Uroviricota	Caudoviricetes		Autographiviridae		Tangaroavirus	NA	Tangaroavirus NATL2A133	Cyanophage NATL2A-133			CG	dsDNA
GCA_000895915.1_ViralProj82647	Duplodnaviria	Heunggongvirae	Uroviricota	Caudoviricetes		Autographiviridae		Bifseptvirus	NA	Bifseptvirus Bf7	Pseudomonas phage Bf7			CG	dsDNA
GCA_000896315.1_ViralProj167661	Duplodnaviria	Heunggongvirae	Uroviricota	Caudoviricetes				Dibbivirus	NA	Dibbivirus DIBBI	Xanthomonas phage vB_XveM_DIBBI			CG	dsDNA
GCA_000896455.1_ViralProj76735	Duplodnaviria	Heunggongvirae	Uroviricota	Caudoviricetes				Coetzeevirus	NA	Coetzeevirus cIP1	Pediococcus phage cIP1			CG	dsDNA
GCA_000896515.1_ViralProj78691	Duplodnaviria	Heunggongvirae	Uroviricota	Caudoviricetes		Zierdtviridae	Petrovskivirinae	Gruunavirus	NA	Gruunavirus GRU1	Gordonia phage GRU1			CG	dsDNA
GCA_000896695.1_ViralProj81173	Duplodnaviria	Heunggongvirae	Uroviricota	Caudoviricetes				Rerduovirus	NA	Rhodococcus virus RER2	Rhodococcus phage RER2			CG	dsDNA
GCA_000896715.1_ViralProj81181	Duplodnaviria	Heunggongvirae	Uroviricota	Caudoviricetes		Autographiviridae		Tangaroavirus	NA	Tangaroavirus tv951510a	Cyanophage 9515-10a			CG	dsDNA
GCA_000897095.1_ViralProj167052	Duplodnaviria	Heunggongvirae	Uroviricota	Caudoviricetes				Septimatrevirus	NA	Pseudomonas virus Kakheti25	Pseudomonas phage vB_Pae-Kakheti25			CG	dsDNA
GCA_000897195.1_ViralProj167663	Duplodnaviria	Heunggongvirae	Uroviricota	Caudoviricetes		Guelinviridae		Brucesealvirus	NA	Brucesealvirus CP7R	Clostridium phage phiCP7R			CG	dsDNA
GCA_000897395.1_ViralProj171970	Duplodnaviria	Heunggongvirae	Uroviricota	Caudoviricetes				Kilunavirus	NA	Kilunavirus KL1	Burkholderia phage vB_BceS_KL1			CG	dsDNA
GCA_000897415.1_ViralProj171974	Duplodnaviria	Heunggongvirae	Uroviricota	Caudoviricetes			Mccleskeyvirinae	Limdunavirus	NA	Limdunavirus Lmd1	Leuconostoc phage Lmd1			CG	dsDNA
GCA_000897755.1_ViralProj177520	Duplodnaviria	Heunggongvirae	Uroviricota	Caudoviricetes		Herelleviridae	Bastillevirinae	Bequatrovirus	NA	Bequatrovirus B4	Bacillus phage B4			CG	dsDNA
GCA_000897775.1_ViralProj177524	Duplodnaviria	Heunggongvirae	Uroviricota	Caudoviricetes				Tigunavirus	NA	Streptomyces virus TG1	Streptomyces phage TG1			CG	dsDNA
GCA_000897855.1_ViralProj177540	Duplodnaviria	Heunggongvirae	Uroviricota	Caudoviricetes		Casjensviridae		Redjacvirus	NA	Redjacvirus redjac	Providencia phage Redjac			CG	dsDNA
GCA_000898015.1_ViralProj179410	Duplodnaviria	Heunggongvirae	Uroviricota	Caudoviricetes				Mimasvirus	NA	Mimasvirus GAP32	Cronobacter phage vB_CsaM_GAP32			CG	dsDNA
GCA_000898175.1_ViralProj167604	Duplodnaviria	Heunggongvirae	Uroviricota	Caudoviricetes				Krylovvirus	NA	Krylovvirus tf	Pseudomonas phage tf			CG	dsDNA
GCA_000898195.1_ViralProj167662	Duplodnaviria	Heunggongvirae	Uroviricota	Caudoviricetes			Gutmannvirinae	Pebcunavirus	NA	Pebcunavirus PBC1	Bacillus phage PBC1			CG	dsDNA
GCA_000898295.2_ViralProj169230	Duplodnaviria	Heunggongvirae	Uroviricota	Caudoviricetes		Straboviridae	Twarogvirinae	Zedzedvirus	NA	Zedzedvirus zz1	Acinetobacter phage ZZ1			CG	dsDNA
GCA_000898315.1_ViralProj169428	Duplodnaviria	Heunggongvirae	Uroviricota	Caudoviricetes				Franklinbayvirus	NA	Franklinbayvirus fv9A	Colwellia phage 9A			CG	dsDNA
GCA_000898415.1_ViralProj171976	Duplodnaviria	Heunggongvirae	Uroviricota	Caudoviricetes				Inhavirus	NA	Inhavirus P12024L	Nonlabens phage P12024S			CG	dsDNA
GCA_000898435.1_ViralProj171980	Duplodnaviria	Heunggongvirae	Uroviricota	Caudoviricetes		Zobellviridae	Cobavirinae	Siovirus	NA	Celeribacter virus P12053L	Celeribacter phage P12053L			CG	dsDNA
GCA_000898735.1_ViralProj177518	Duplodnaviria	Heunggongvirae	Uroviricota	Caudoviricetes		Herelleviridae	Bastillevirinae	Tsarbombavirus	NA	Tsarbombavirus BCP78	Bacillus phage BCP78			CG	dsDNA
GCA_000898755.1_ViralProj177522	Duplodnaviria	Heunggongvirae	Uroviricota	Caudoviricetes			Arquatrovirinae	Hautrevirus	NA	Hautrevirus hau3	Streptomyces phage phiHau3			CG	dsDNA
GCA_000898835.1_ViralProj177538	Duplodnaviria	Heunggongvirae	Uroviricota	Caudoviricetes				Pahexavirus	NA	Propionibacterium virus ATCC29399BT	Propionibacterium phage ATCC29399B_T			CG	dsDNA
GCA_000898895.1_ViralProj169229	Duplodnaviria	Heunggongvirae	Uroviricota	Caudoviricetes				Saphexavirus	NA	Enterococcus virus BC611	Enterococcus phage BC611			CG	dsDNA
GCA_000898915.1_ViralProj169233	Duplodnaviria	Heunggongvirae	Uroviricota	Caudoviricetes				Camtrevirus	NA	Camtrevirus BtCS33	Bacillus phage BtCS33			CG	dsDNA
GCA_000898995.1_ViralProj171971	Duplodnaviria	Heunggongvirae	Uroviricota	Caudoviricetes		Casjensviridae		Ahduovirus	NA	Burkholderia virus AH2	Burkholderia phage vB_BceS_AH2			CG	dsDNA
GCA_000899015.1_ViralProj171975	Duplodnaviria	Heunggongvirae	Uroviricota	Caudoviricetes				Inhavirus	NA	Inhavirus P12024S	Nonlabens phage P12024S			CG	dsDNA
GCA_000899055.1_ViralProj171983	Duplodnaviria	Heunggongvirae	Uroviricota	Caudoviricetes		Mesyanzhinovviridae	Rabinowitzvirinae	Yuavirus	NA	Pseudomonas virus MP1412	Pseudomonas phage MP1412			CG	dsDNA
GCA_000899355.1_ViralProj177525	Duplodnaviria	Heunggongvirae	Uroviricota	Caudoviricetes		Demerecviridae	Mccorquodalevirinae	Myunavirus	NA	Myunavirus My1	Pectobacterium phage My1			CG	dsDNA
GCA_000899455.1_ViralProj177545	Duplodnaviria	Heunggongvirae	Uroviricota	Caudoviricetes			Eucampyvirinae	Fletchervirus	NA	Fletchervirus CP30A	Campylobacter phage CP30A			CG	dsDNA
GCA_000899475.1_ViralProj177550	Duplodnaviria	Heunggongvirae	Uroviricota	Caudoviricetes		Herelleviridae	Bastillevirinae	Bastillevirus	NA	Bastillevirus bastille	Bacillus phage Bastille			CG	dsDNA
GCA_000899575.1_ViralProj179407	Duplodnaviria	Heunggongvirae	Uroviricota	Caudoviricetes			Arquatrovirinae	Arequatrovirus	NA	Arequatrovirus R4	Streptomyces phage R4			CG	dsDNA
GCA_000899615.1_ViralProj179415	Duplodnaviria	Heunggongvirae	Uroviricota	Caudoviricetes		Straboviridae	Tevenvirinae	Tequatrovirus	NA	Tequatrovirus c40	Escherichia phage vB_EcoM_ACG-C40			CG	dsDNA
GCA_000899635.1_ViralProj179419	Duplodnaviria	Heunggongvirae	Uroviricota	Caudoviricetes			Dolichocephalovirinae	Colossusvirus	NA	Colossusvirus colossus	Caulobacter phage CcrColossus			CG	dsDNA
GCA_000899655.1_ViralProj179423	Duplodnaviria	Heunggongvirae	Uroviricota	Caudoviricetes			Dolichocephalovirinae	Shapirovirus	NA	Shapirovirus swift	Caulobacter phage CcrSwift			CG	dsDNA
GCA_000899755.1_ViralProj169231	Duplodnaviria	Heunggongvirae	Uroviricota	Caudoviricetes		Guelinviridae		Brucesealvirus	NA	Brucesealvirus CPV4	Clostridium phage phiCPV4			CG	dsDNA
GCA_000900195.1_ViralProj177519	Duplodnaviria	Heunggongvirae	Uroviricota	Caudoviricetes		Herelleviridae	Bastillevirinae	Wphvirus	NA	Wphvirus BPS13	Bacillus phage BPS13			CG	dsDNA
GCA_000900235.1_ViralProj177527	Duplodnaviria	Heunggongvirae	Uroviricota	Caudoviricetes		Schitoviridae	Enquartavirinae	Gamaleyavirus	NA	Escherichia virus ECBP1	Escherichia phage ECBP1			CG	dsDNA
GCA_000900295.1_ViralProj177539	Duplodnaviria	Heunggongvirae	Uroviricota	Caudoviricetes				Pahexavirus	NA	Propionibacterium virus ATCC29399BC	Propionibacterium phage ATCC29399B_C			CG	dsDNA
GCA_000900335.1_ViralProj177548	Duplodnaviria	Heunggongvirae	Uroviricota	Caudoviricetes				Vicosavirus	NA	Vicosavirus UFVP2	Pseudomonas phage UFV-P2			CG	dsDNA
GCA_000900455.1_ViralProj179409	Duplodnaviria	Heunggongvirae	Uroviricota	Caudoviricetes			Vequintavirinae	Seunavirus	NA	Seunavirus GAP31	Cronobacter phage vB_CsaM_GAP31			CG	dsDNA
GCA_000900475.1_ViralProj179413	Duplodnaviria	Heunggongvirae	Uroviricota	Caudoviricetes		Autographiviridae	Molineuxvirinae	Vectrevirus	NA	Vectrevirus ACGC91	Escherichia phage vB_EcoP_ACG-C91			CG	dsDNA
GCA_000900515.1_ViralProj179414	Duplodnaviria	Heunggongvirae	Uroviricota	Caudoviricetes		Drexlerviridae	Braunvirinae	Guelphvirus	NA	Guelphvirus ACGM12	Escherichia phage vB_EcoS_ACG-M12			CG	dsDNA
GCA_000900535.1_ViralProj179418	Duplodnaviria	Heunggongvirae	Uroviricota	Caudoviricetes			Dolichocephalovirinae	Shapirovirus	NA	Shapirovirus cbk	Caulobacter phage phiCbK			CG	dsDNA
GCA_000900555.1_ViralProj179422	Duplodnaviria	Heunggongvirae	Uroviricota	Caudoviricetes			Dolichocephalovirinae	Poindextervirus	NA	Poindextervirus rogue	Caulobacter phage CcrRogue			CG	dsDNA
GCA_000900595.1_ViralProj179430	Duplodnaviria	Heunggongvirae	Uroviricota	Caudoviricetes				Kafunavirus	NA	Kafunavirus KF1	Edwardsiella phage KF-1			CG	dsDNA
GCA_000900615.1_ViralProj181063	Duplodnaviria	Heunggongvirae	Uroviricota	Caudoviricetes				Perisivirus	NA	Perisivirus Tb	Brucella phage Tb			CG	dsDNA
GCA_000900655.1_ViralProj181071	Duplodnaviria	Heunggongvirae	Uroviricota	Caudoviricetes		Schitoviridae		Eceepunavirus	NA	Eceepunavirus EcP1	Enterobacter phage EcP1			CG	dsDNA
GCA_000900675.1_ViralProj181075	Duplodnaviria	Heunggongvirae	Uroviricota	Caudoviricetes			Sepvirinae	Oslovirus	NA	Oslovirus TL2011	Escherichia phage TL-2011c			CG	dsDNA
GCA_000900695.1_ViralProj181079	Duplodnaviria	Heunggongvirae	Uroviricota	Caudoviricetes		Autographiviridae		Limelightvirus	NA	Limelightvirus limelight	Pantoea phage LIMElight			CG	dsDNA
GCA_000900715.1_ViralProj181083	Duplodnaviria	Heunggongvirae	Uroviricota	Caudoviricetes				Lafunavirus	NA	Lactobacillus virus LF1	Lactobacillus phage LF1			CG	dsDNA
GCA_000900735.1_ViralProj181212	Duplodnaviria	Heunggongvirae	Uroviricota	Caudoviricetes		Straboviridae	Tevenvirinae	Dhakavirus	NA	Dhakavirus bp7	Escherichia phage Bp7			CG	dsDNA
GCA_000900775.1_ViralProj181220	Duplodnaviria	Heunggongvirae	Uroviricota	Caudoviricetes				Becedseptimavirus	NA	Becedseptimavirus BCD7	Bacillus phage BCD7			CG	dsDNA
GCA_000900795.1_ViralProj181224	Duplodnaviria	Heunggongvirae	Uroviricota	Caudoviricetes		Demerecviridae	Ermolyevavirinae	Vipunavirus	NA	Vipunavirus pVp1	Vibrio phage pVP-1			CG	dsDNA
GCA_000900955.1_ViralProj181988	Duplodnaviria	Heunggongvirae	Uroviricota	Caudoviricetes		Autographiviridae	Molineuxvirinae	Axomammavirus	NA	Axomammavirus PP1	Pectobacterium phage PP1			CG	dsDNA
GCA_000900975.1_ViralProj181992	Duplodnaviria	Heunggongvirae	Uroviricota	Caudoviricetes		Zobellviridae		Salinovirus	NA	Salinivibrio virus CW02	Salinivibrio phage CW02			CG	dsDNA
GCA_000901015.1_ViralProj183139	Duplodnaviria	Heunggongvirae	Uroviricota	Caudoviricetes			Hendrixvirinae	Yautsimvirus	NA	Yautsimvirus HK140	Enterobacteria phage HK140			CG	dsDNA
GCA_000901035.1_ViralProj183143	Duplodnaviria	Heunggongvirae	Uroviricota	Caudoviricetes			Hendrixvirinae	Saikungvirus	NA	Saikungvirus HK633	Enterobacteria phage HK633			CG	dsDNA
GCA_000901095.1_ViralProj183155	Duplodnaviria	Heunggongvirae	Uroviricota	Caudoviricetes		Drexlerviridae	Tunavirinae	Tunavirus	NA	Tunavirus ADB2	Escherichia phage ADB-2			CG	dsDNA
GCA_000901115.1_ViralProj183159	Duplodnaviria	Heunggongvirae	Uroviricota	Caudoviricetes			Hendrixvirinae	Wongtaivirus	NA	Wongtaivirus HK542	Enterobacteria phage HK542			CG	dsDNA
GCA_000901215.2_ViralProj184145	Duplodnaviria	Heunggongvirae	Uroviricota	Caudoviricetes		Autographiviridae	Melnykvirinae	Pokrovskaiavirus	NA	Pokrovskaiavirus pv8018	Yersinia phage phi80-18			CG	dsDNA
GCA_000901235.1_ViralProj184150	Duplodnaviria	Heunggongvirae	Uroviricota	Caudoviricetes				Coetzeevirus	NA	Coetzeevirus ATCC8014	Lactobacillus phage ATCC 8014-B1			CG	dsDNA
GCA_000901275.1_ViralProj184158	Duplodnaviria	Heunggongvirae	Uroviricota	Caudoviricetes				Klementvirus	NA	Klementvirus CP1	Xanthomonas phage CP1			CG	dsDNA
GCA_000901315.1_ViralProj184166	Duplodnaviria	Heunggongvirae	Uroviricota	Caudoviricetes		Peduoviridae		Entnonagintavirus	NA	Entnonagintavirus ENT90	Erwinia phage ENT90			CG	dsDNA
GCA_000901375.1_ViralProj177542	Duplodnaviria	Heunggongvirae	Uroviricota	Caudoviricetes		Straboviridae	Tevenvirinae	Mosigvirus	NA	Mosigvirus HX01	Escherichia phage HX01			CG	dsDNA
GCA_000901535.1_ViralProj179412	Duplodnaviria	Heunggongvirae	Uroviricota	Caudoviricetes		Straboviridae		Pseudotevenvirus	NA	Pseudotevenvirus gap161	Cronobacter phage vB_CsaM_GAP161			CG	dsDNA
GCA_000901675.1_ViralProj181069	Duplodnaviria	Heunggongvirae	Uroviricota	Caudoviricetes		Herelleviridae	Twortvirinae	Kayvirus	NA	Kayvirus G15	Staphylococcus phage G15			CG	dsDNA
GCA_000901695.1_ViralProj181073	Duplodnaviria	Heunggongvirae	Uroviricota	Caudoviricetes		Kyanoviridae		Galenevirus	NA	Galenevirus mbcm1	Synechococcus phage metaG-MbCM1			CG	dsDNA
GCA_000901715.1_ViralProj181077	Duplodnaviria	Heunggongvirae	Uroviricota	Caudoviricetes				Cequinquevirus	NA	Cequinquevirus c5	Lactobacillus phage c5			CG	dsDNA
GCA_000901775.1_ViralProj181214	Duplodnaviria	Heunggongvirae	Uroviricota	Caudoviricetes				Popoffvirus	NA	Popoffvirus pv56	Aeromonas phage vB_AsaM-56			CG	dsDNA
GCA_000901795.1_ViralProj181218	Duplodnaviria	Heunggongvirae	Uroviricota	Caudoviricetes		Guelinviridae	Denniswatsonvirinae	Gregsiragusavirus	NA	Gregsiragusavirus phi24R	Clostridium phage phi24R			CG	dsDNA
GCA_000901815.1_ViralProj181222	Duplodnaviria	Heunggongvirae	Uroviricota	Caudoviricetes		Autographiviridae		Ermolevavirus	NA	Ermolevavirus PhiKT	Escherichia phage phiKT			CG	dsDNA
GCA_000901835.1_ViralProj181226	Duplodnaviria	Heunggongvirae	Uroviricota	Caudoviricetes				Schmittlotzvirus	NA	Schmittlotzvirus sv771	Agrobacterium phage 7-7-1			CG	dsDNA
GCA_000901855.1_ViralProj181230	Duplodnaviria	Heunggongvirae	Uroviricota	Caudoviricetes		Schitoviridae		Waedenswilvirus	NA	Waedenswilvirus S6	Erwinia phage vB_EamP-S6			CG	dsDNA
GCA_000901875.1_ViralProj181234	Duplodnaviria	Heunggongvirae	Uroviricota	Caudoviricetes		Drexlerviridae		Kyungwonvirus	NA	Kyungwonvirus Esp29491	Cronobacter virus Esp2949-1			CG	dsDNA
GCA_000901895.2_ViralProj181238	Duplodnaviria	Heunggongvirae	Uroviricota	Caudoviricetes		Casjensviridae		Enchivirus	NA	Enchivirus Enc34	Enterobacter phage Enc34			CG	dsDNA
GCA_000901915.1_ViralProj181242	Duplodnaviria	Heunggongvirae	Uroviricota	Caudoviricetes		Herelleviridae	Twortvirinae	Silviavirus	NA	Silviavirus SA11	Staphylococcus phage SA11			CG	dsDNA
GCA_000901975.1_ViralProj181986	Duplodnaviria	Heunggongvirae	Uroviricota	Caudoviricetes		Straboviridae		Tulanevirus	NA	Tulanevirus aes508	Aeromonas phage Aes508			CG	dsDNA
GCA_000902055.1_ViralProj183141	Duplodnaviria	Heunggongvirae	Uroviricota	Caudoviricetes			Hendrixvirinae	Kwaitsingvirus	NA	Kwaitsingvirus HK446	Enterobacteria phage HK446			CG	dsDNA
GCA_000902075.1_ViralProj183145	Duplodnaviria	Heunggongvirae	Uroviricota	Caudoviricetes				Aguilavirus	NA	Aguilavirus mEp043	Enterobacteria phage mEp043 c-1			CG	dsDNA
GCA_000902095.1_ViralProj183149	Duplodnaviria	Heunggongvirae	Uroviricota	Caudoviricetes			Hendrixvirinae	Cuauhtlivirus	NA	Cuauhtlivirus mEpX1	Enterobacteria phage mEpX1			CG	dsDNA
GCA_000902115.1_ViralProj183153	Duplodnaviria	Heunggongvirae	Uroviricota	Caudoviricetes			Hendrixvirinae	Wanchaivirus	NA	Wanchaivirus mEp234	Enterobacterial phage mEp234			CG	dsDNA
GCA_000902135.1_ViralProj183157	Duplodnaviria	Heunggongvirae	Uroviricota	Caudoviricetes				Mardecavirus	NA	Vibrio virus MAR10	Vibrio phage vB_VpaS_ MAR10			CG	dsDNA
GCA_000902275.1_ViralProj181064	Duplodnaviria	Heunggongvirae	Uroviricota	Caudoviricetes				Perisivirus	NA	Perisivirus Pr	Brucella phage Pr			CG	dsDNA
GCA_000902295.1_ViralProj181068	Duplodnaviria	Heunggongvirae	Uroviricota	Caudoviricetes				Pakpunavirus	NA	Pakpunavirus JG004	Pseudomonas phage JG004			CG	dsDNA
GCA_000902315.1_ViralProj181072	Duplodnaviria	Heunggongvirae	Uroviricota	Caudoviricetes		Kyanoviridae		Namakavirus	NA	Namakavirus smbcm6	Synechococcus phage S-MbCM6			CG	dsDNA
GCA_000902395.1_ViralProj181213	Duplodnaviria	Heunggongvirae	Uroviricota	Caudoviricetes				Camtrevirus	NA	Camtrevirus S3501	Bacillus phage phIS3501			CG	dsDNA
GCA_000902435.1_ViralProj181221	Duplodnaviria	Heunggongvirae	Uroviricota	Caudoviricetes		Autographiviridae	Melnykvirinae	Aerosvirus	NA	Aerosvirus AS7	Aeromonas phage phiAS7			CG	dsDNA
GCA_000902475.1_ViralProj181229	Duplodnaviria	Heunggongvirae	Uroviricota	Caudoviricetes		Autographiviridae	Studiervirinae	Elunavirus	NA	Elunavirus L1	Erwinia phage vB_EamP-L1			CG	dsDNA
GCA_000902515.2_ViralProj181237	Duplodnaviria	Heunggongvirae	Uroviricota	Caudoviricetes				Aurunvirus	NA	Aurunvirus STIM5	Cyanophage S-TIM5			CG	dsDNA
GCA_000902535.1_ViralProj181241	Duplodnaviria	Heunggongvirae	Uroviricota	Caudoviricetes			Eucampyvirinae	Firehammervirus	NA	Firehammervirus CP21	Campylobacter phage CP21			CG	dsDNA
GCA_000902615.1_ViralProj181989	Duplodnaviria	Heunggongvirae	Uroviricota	Caudoviricetes				Vieuvirus	NA	Acinetobacter virus B1251	Acinetobacter phage YMC/09/02/B1251			CG	dsDNA
GCA_000902635.1_ViralProj181993	Duplodnaviria	Heunggongvirae	Uroviricota	Caudoviricetes			Guernseyvirinae	Jerseyvirus	NA	Jerseyvirus Ent1	Salmonella phage vB_SenS-Ent1			CG	dsDNA
GCA_000902695.1_ViralProj183144	Duplodnaviria	Heunggongvirae	Uroviricota	Caudoviricetes				Lambdavirus	NA	Escherichia virus HK629	Escherichia phage HK629			CG	dsDNA
GCA_000902735.1_ViralProj183152	Duplodnaviria	Heunggongvirae	Uroviricota	Caudoviricetes				Aguilavirus	NA	Aguilavirus mEp213	Enterobacterial phage mEp213			CG	dsDNA
GCA_000902755.1_ViralProj183156	Duplodnaviria	Heunggongvirae	Uroviricota	Caudoviricetes				Vhmlvirus	NA	Vhmlvirus mar	Vibrio phage vB_VpaM_MAR			CG	dsDNA
GCA_000902775.1_ViralProj183160	Duplodnaviria	Heunggongvirae	Uroviricota	Caudoviricetes			Hendrixvirinae	Kwaitsingvirus	NA	Kwaitsingvirus HK544	Enterobacteria phage HK544			CG	dsDNA
GCA_000902875.1_ViralProj184146	Duplodnaviria	Heunggongvirae	Uroviricota	Caudoviricetes				Pakpunavirus	NA	Pakpunavirus CAb1	Pseudomonas phage vB_PaeM_C2-10_Ab1			CG	dsDNA
GCA_000902915.1_ViralProj184155	Duplodnaviria	Heunggongvirae	Uroviricota	Caudoviricetes				Erskinevirus	NA	Erskinevirus EaH2	Erwinia phage PhiEaH2			CG	dsDNA
GCA_000902935.1_ViralProj184159	Duplodnaviria	Heunggongvirae	Uroviricota	Caudoviricetes				Schmidvirus	NA	Schmidvirus KHP40	Helicobacter phage KHP40			CG	dsDNA
GCA_000902955.1_ViralProj184163	Duplodnaviria	Heunggongvirae	Uroviricota	Caudoviricetes				Schmidvirus	NA	Schmidvirus KHP30	Helicobacter phage KHP30			CG	dsDNA
GCA_000902975.1_ViralProj184167	Duplodnaviria	Heunggongvirae	Uroviricota	Caudoviricetes				Tijeunavirus	NA	Tijeunavirus TJE1	Tetrasphaera phage TJE1			CG	dsDNA
GCA_000903075.1_ViralProj185317	Duplodnaviria	Heunggongvirae	Uroviricota	Caudoviricetes		Ackermannviridae	Aglimvirinae	Limestonevirus	NA	Limestonevirus limestone	Dickeya phage vB-DsoM-LIMEstone1			CG	dsDNA
GCA_000903135.1_ViralProj179429	Duplodnaviria	Heunggongvirae	Uroviricota	Caudoviricetes		Autographiviridae	Studiervirinae	Teseptimavirus	NA	Teseptimavirus IME15	Stenotrophomonas phage IME15			CG	dsDNA
GCA_000903195.1_ViralProj181070	Duplodnaviria	Heunggongvirae	Uroviricota	Caudoviricetes		Peduoviridae		Felsduovirus	NA	Felsduovirus RE2010	Salmonella phage RE2010			CG	dsDNA
GCA_000903315.1_ViralProj181219	Duplodnaviria	Heunggongvirae	Uroviricota	Caudoviricetes			Vequintavirinae	Vequintavirus	NA	Vequintavirus FV3	Escherichia phage FV3			CG	dsDNA
GCA_000903335.1_ViralProj181223	Duplodnaviria	Heunggongvirae	Uroviricota	Caudoviricetes				Alcyoneusvirus	NA	Alcyoneusvirus RaK2	Klebsiella phage vB_KleM_RaK2			CG	dsDNA
GCA_000903375.1_ViralProj181231	Duplodnaviria	Heunggongvirae	Uroviricota	Caudoviricetes		Chaseviridae	Cleopatravirinae	Loessnervirus	NA	Loessnervirus Y2	Erwinia phage vB_EamM-Y2			CG	dsDNA
GCA_000903415.1_ViralProj181239	Duplodnaviria	Heunggongvirae	Uroviricota	Caudoviricetes				Schmidvirus	NA	Schmidvirus sv1961P	Helicobacter phage 1961P			CG	dsDNA
GCA_000903495.1_ViralProj181987	Duplodnaviria	Heunggongvirae	Uroviricota	Caudoviricetes		Straboviridae	Emmerichvirinae	Ceceduovirus	NA	Ceceduovirus cc2	Aeromonas phage CC2			CG	dsDNA
GCA_000903555.1_ViralProj183138	Duplodnaviria	Heunggongvirae	Uroviricota	Caudoviricetes				Dhillonvirus	NA	Dhillonvirus HK578	Escherichia phage HK578			CG	dsDNA
GCA_000903575.1_ViralProj183142	Duplodnaviria	Heunggongvirae	Uroviricota	Caudoviricetes				Lambdavirus	NA	Escherichia virus HK630	Escherichia phage HK630			CG	dsDNA
GCA_000903595.1_ViralProj183146	Duplodnaviria	Heunggongvirae	Uroviricota	Caudoviricetes			Hendrixvirinae	Nochtlivirus	NA	Nochtlivirus mEp235	Enterobacteria phage mEp235			CG	dsDNA
GCA_000903615.1_ViralProj183150	Duplodnaviria	Heunggongvirae	Uroviricota	Caudoviricetes			Hendrixvirinae	Shamshuipovirus	NA	Shamshuipovirus mEpX2	Enterobacteria phage mEpX2			CG	dsDNA
GCA_000903655.1_ViralProj183158	Duplodnaviria	Heunggongvirae	Uroviricota	Caudoviricetes			Hendrixvirinae	Wanchaivirus	NA	Wanchaivirus HK106	Enterobacteria phage HK106			CG	dsDNA
GCA_000903675.1_ViralProj183162	Duplodnaviria	Heunggongvirae	Uroviricota	Caudoviricetes		Herelleviridae	Twortvirinae	Kayvirus	NA	Kayvirus JD7	Staphylococcus phage JD007			CG	dsDNA
GCA_000903775.1_ViralProj184149	Duplodnaviria	Heunggongvirae	Uroviricota	Caudoviricetes				Lessievirus	NA	Lessievirus bcepmigl	Burkholderia phage BcepMigl			CG	dsDNA
GCA_000903995.1_ViralProj185316	Duplodnaviria	Heunggongvirae	Uroviricota	Caudoviricetes		Autographiviridae	Melnykvirinae	Cronosvirus	NA	Cronosvirus GAP227	Cronobacter phage vB_CskP_GAP227			CG	dsDNA
GCA_000904255.1_ViralProj192867	Duplodnaviria	Heunggongvirae	Uroviricota	Caudoviricetes		Autographiviridae		Stopavirus	NA	Stopavirus HTVC011P	Pelagibacter phage HTVC011P			CG	dsDNA
GCA_000904275.1_ViralProj192872	Duplodnaviria	Heunggongvirae	Uroviricota	Caudoviricetes				Andromedavirus	NA	Andromedavirus andromeda	Bacillus phage Andromeda			CG	dsDNA
GCA_000904455.1_ViralProj195489	Duplodnaviria	Heunggongvirae	Uroviricota	Caudoviricetes				Llyrvirus	NA	Llyrvirus SSKS1	Synechococcus phage S-SKS1			CG	dsDNA
GCA_000904475.1_ViralProj195493	Duplodnaviria	Heunggongvirae	Uroviricota	Caudoviricetes		Schitoviridae	Fuhrmanvirinae	Stoningtonvirus	NA	Stoningtonvirus VBP47	Vibrio phage VBP47			CG	dsDNA
GCA_000904535.1_ViralProj195505	Duplodnaviria	Heunggongvirae	Uroviricota	Caudoviricetes				Eurybiavirus	NA	Eurybiavirus MED4213	Cyanophage MED4-213			CG	dsDNA
GCA_000904555.1_ViralProj195517	Duplodnaviria	Heunggongvirae	Uroviricota	Caudoviricetes		Autographiviridae		Tritonvirus	NA	Tritonvirus PSSP3	Prochlorococcus phage P-SSP3			CG	dsDNA
GCA_000904695.1_ViralProj197297	Duplodnaviria	Heunggongvirae	Uroviricota	Caudoviricetes			Nclasvirinae	Charlievirus	NA	Charlievirus butters	Mycobacterium phage Butters			CG	dsDNA
GCA_000904795.1_ViralProj184143	Duplodnaviria	Heunggongvirae	Uroviricota	Caudoviricetes		Straboviridae	Tevenvirinae	Tegunavirus	NA	Tegunavirus r1rt	Yersinia phage phiR1-RT			CG	dsDNA
GCA_000904835.1_ViralProj184152	Duplodnaviria	Heunggongvirae	Uroviricota	Caudoviricetes				Lwoffvirus	NA	Bacillus virus BMBtp2	Bacillus phage vB_BtS_BMBtp2			CG	dsDNA
GCA_000904875.1_ViralProj184160	Duplodnaviria	Heunggongvirae	Uroviricota	Caudoviricetes		Ackermannviridae	Aglimvirinae	Agtrevirus	NA	Agtrevirus SKML39	Salmonella phage SKML-39			CG	dsDNA
GCA_000904995.1_ViralProj185314	Duplodnaviria	Heunggongvirae	Uroviricota	Caudoviricetes		Straboviridae		Slopekvirus	NA	Slopekvirus kp27	Klebsiella phage KP27			CG	dsDNA
GCA_000905015.1_ViralProj185318	Duplodnaviria	Heunggongvirae	Uroviricota	Caudoviricetes		Herelleviridae	Bastillevirinae	Agatevirus	NA	Agatevirus agate	Bacillus phage phiAGATE			CG	dsDNA
GCA_000905035.1_ViralProj185777	Duplodnaviria	Heunggongvirae	Uroviricota	Caudoviricetes		Ackermannviridae		Miltonvirus	NA	Miltonvirus MAM1	Serratia phage phiMAM1			CG	dsDNA
GCA_000905195.1_ViralProj191122	Duplodnaviria	Heunggongvirae	Uroviricota	Caudoviricetes		Straboviridae	Tevenvirinae	Gelderlandvirus	NA	Gelderlandvirus s16	Salmonella phage vB_SenM-S16			CG	dsDNA
GCA_000905455.1_ViralProj195487	Duplodnaviria	Heunggongvirae	Uroviricota	Caudoviricetes		Autographiviridae		Kajamvirus	NA	Kajamvirus SRIP1	Synechococcus phage S-RIP1			CG	dsDNA
GCA_000905515.1_ViralProj195499	Duplodnaviria	Heunggongvirae	Uroviricota	Caudoviricetes		Autographiviridae		Tangaroavirus	NA	Tangaroavirus PSSP10	Prochlorococcus phage P-SSP10			CG	dsDNA
GCA_000905555.1_ViralProj195515	Duplodnaviria	Heunggongvirae	Uroviricota	Caudoviricetes		Kyanoviridae		Greenvirus	NA	Greenvirus ssm4	Synechococcus phage S-SSM4			CG	dsDNA
GCA_000905575.1_ViralProj195527	Duplodnaviria	Heunggongvirae	Uroviricota	Caudoviricetes		Herelleviridae	Jasinkavirinae	Pecentumvirus	NA	Pecentumvirus AG20	Listeria phage vB_LmoM_AG20			CG	dsDNA
GCA_000905655.1_ViralProj185428	Duplodnaviria	Heunggongvirae	Uroviricota	Caudoviricetes				Yokohamavirus	NA	Yokohamavirus MSW3	Edwardsiella phage MSW-3			CG	dsDNA
GCA_000905755.1_ViralProj188547	Duplodnaviria	Heunggongvirae	Uroviricota	Caudoviricetes				Jedunavirus	NA	Jedunavirus JD001	Klebsiella phage JD001			CG	dsDNA
GCA_000905795.2_ASM90579v2	Duplodnaviria	Heunggongvirae	Uroviricota	Caudoviricetes		Autographiviridae	Molineuxvirinae	Zindervirus	NA	Zindervirus UAB78	Escherichia phage UAB_Phi78			CG	dsDNA
GCA_000905875.1_ViralProj192868	Duplodnaviria	Heunggongvirae	Uroviricota	Caudoviricetes		Autographiviridae		Pelagivirus	NA	Pelagivirus HTVC019P	Pelagibacter phage HTVC019P			CG	dsDNA
GCA_000905895.1_ViralProj192873	Duplodnaviria	Heunggongvirae	Uroviricota	Caudoviricetes				Andromedavirus	NA	Andromedavirus curly	Bacillus phage Curly			CG	dsDNA
GCA_000905995.1_ViralProj195474	Duplodnaviria	Heunggongvirae	Uroviricota	Caudoviricetes		Schitoviridae	Rhodovirinae	Raunefjordenvirus	NA	Raunefjordenvirus CB2047B	Sulfitobacter phage phiCB2047-B			CG	dsDNA
GCA_000906015.1_ViralProj195478	Duplodnaviria	Heunggongvirae	Uroviricota	Caudoviricetes		Schitoviridae	Fuhrmanvirinae	Matsuvirus	NA	Matsuvirus pYD6A	Pseudoalteromonas phage pYD6-A			CG	dsDNA
GCA_000906055.1_ViralProj195486	Duplodnaviria	Heunggongvirae	Uroviricota	Caudoviricetes		Autographiviridae		Sednavirus	NA	Sednavirus SRIP2	Synechococcus phage S-RIP2			CG	dsDNA
GCA_000906115.1_ViralProj195498	Duplodnaviria	Heunggongvirae	Uroviricota	Caudoviricetes				Cbastvirus	NA	Cbastvirus ST	Cellulophaga phage phiST			CG	dsDNA
GCA_000906175.1_ViralProj195518	Duplodnaviria	Heunggongvirae	Uroviricota	Caudoviricetes		Autographiviridae		Lingvirus	NA	Lingvirus PGSP1	Prochlorococcus phage P-GSP1			CG	dsDNA
GCA_000906215.1_ViralProj195534	Duplodnaviria	Heunggongvirae	Uroviricota	Caudoviricetes		Herelleviridae	Bastillevirinae	Caeruleovirus	NA	Caeruleovirus Bc431	Bacillus phage vB_BceM_Bc431v3			CG	dsDNA
GCA_000906315.1_ViralProj197298	Duplodnaviria	Heunggongvirae	Uroviricota	Caudoviricetes		Autographiviridae	Studiervirinae	Pifdecavirus	NA	Pifdecavirus PhiS1	Pseudomonas phage Phi-S1			CG	dsDNA
GCA_000906475.1_ViralProj185315	Duplodnaviria	Heunggongvirae	Uroviricota	Caudoviricetes		Kwiatkowskiviridae	Stephanstirmvirinae	Phapecoctavirus	NA	Escherichia virus phAPEC8	Escherichia phage phAPEC8			CG	dsDNA
GCA_000906875.1_ViralProj195476	Duplodnaviria	Heunggongvirae	Uroviricota	Caudoviricetes		Casjensviridae		Broinstvirus	NA	Broinstvirus pCB2051A	Loktanella phage pCB2051-A			CG	dsDNA
GCA_000906915.1_ViralProj195484	Duplodnaviria	Heunggongvirae	Uroviricota	Caudoviricetes		Kyanoviridae		Anaposvirus	NA	Anaposvirus socalone	Synechococcus phage S-CAM1			CG	dsDNA
GCA_000906935.1_ViralProj195488	Duplodnaviria	Heunggongvirae	Uroviricota	Caudoviricetes		Kyanoviridae		Nerrivikvirus	NA	Nerrivikvirus srim2	Synechococcus phage S-RIM2 R1_1999			CG	dsDNA
GCA_000907035.1_ViralProj195516	Duplodnaviria	Heunggongvirae	Uroviricota	Caudoviricetes		Autographiviridae		Banchanvirus	NA	Banchanvirus SS1201	Cyanophage SS120-1			CG	dsDNA
GCA_000907075.1_ViralProj195532	Duplodnaviria	Heunggongvirae	Uroviricota	Caudoviricetes		Straboviridae		Tulanevirus	NA	Tulanevirus aes12	Aeromonas phage Aes012			CG	dsDNA
GCA_000907095.1_ViralProj195536	Duplodnaviria	Heunggongvirae	Uroviricota	Caudoviricetes				Pemunavirus	NA	Pemunavirus PM1	Bacillus phage PM1			CG	dsDNA
GCA_000907175.1_ViralProj197296	Duplodnaviria	Heunggongvirae	Uroviricota	Caudoviricetes				Mapvirus	NA	Mycobacterium virus Ff47	Mycobacterium phage FF47			CG	dsDNA
GCA_000907215.1_ViralProj198437	Duplodnaviria	Heunggongvirae	Uroviricota	Caudoviricetes		Kyanoviridae		Leucotheavirus	NA	Leucotheavirus syn30	Synechococcus phage Syn30			CG	dsDNA
GCA_000907455.1_ViralProj206031	Duplodnaviria	Heunggongvirae	Uroviricota	Caudoviricetes				Timshelvirus	NA	Timshelvirus HINdeR	Mycobacterium phage HINdeR			CG	dsDNA
GCA_000907495.1_ViralProj206039	Duplodnaviria	Heunggongvirae	Uroviricota	Caudoviricetes		Zobellviridae		Melvirus	NA	Pseudoalteromonas virus RIO1	Pseudoalteromonas phage RIO-1			CG	dsDNA
GCA_000907515.1_ViralProj206470	Duplodnaviria	Heunggongvirae	Uroviricota	Caudoviricetes		Autographiviridae	Beijerinckvirinae	Friunavirus	NA	Friunavirus Abp1	Acinetobacter phage Abp1			CG	dsDNA
GCA_000907715.1_ViralProj209065	Duplodnaviria	Heunggongvirae	Uroviricota	Caudoviricetes		Kyanoviridae		Neritesvirus	NA	Neritesvirus scam8	Synechococcus phage S-CAM8			CG	dsDNA
GCA_000907735.1_ViralProj209073	Duplodnaviria	Heunggongvirae	Uroviricota	Caudoviricetes		Schitoviridae		Efbeekayvirus	NA	Efbeekayvirus Fbkp27	Klebsiella phage vB_KpP_FBKp27			CG	dsDNA
GCA_000907775.1_ViralProj209210	Duplodnaviria	Heunggongvirae	Uroviricota	Caudoviricetes		Kyanoviridae		Ronodorvirus	NA	Ronodorvirus pssm3	Prochlorococcus phage P-SSM3			CG	dsDNA
GCA_000907895.1_ViralProj212710	Duplodnaviria	Heunggongvirae	Uroviricota	Caudoviricetes			Bronfenbrennervirinae	Peeveelvirus	NA	Peeveelvirus JS01	Staphylococcus phage JS01			CG	dsDNA
GCA_000907915.1_ViralProj212714	Duplodnaviria	Heunggongvirae	Uroviricota	Caudoviricetes		Peduoviridae		Stockinghallvirus	NA	Stockinghallvirus FSLSP004	Salmonella phage FSLSP004			CG	dsDNA
GCA_000907935.1_ViralProj212718	Duplodnaviria	Heunggongvirae	Uroviricota	Caudoviricetes				Chivirus	NA	Chivirus FSLSP030	Salmonella phage FSL SP-030			CG	dsDNA
GCA_000907955.1_ViralProj212944	Duplodnaviria	Heunggongvirae	Uroviricota	Caudoviricetes				Homburgvirus	NA	Homburgvirus LP110	Listeria phage LP-110			CG	dsDNA
GCA_000907995.1_ViralProj212953	Duplodnaviria	Heunggongvirae	Uroviricota	Caudoviricetes		Pachyviridae		Baltivirus	NA	Baltivirus phi13duo	Cellulophaga phage phi13:2			CG	dsDNA
GCA_000908055.1_ViralProj212965	Duplodnaviria	Heunggongvirae	Uroviricota	Caudoviricetes				Lightbulbvirus	NA	Lightbulbvirus Cba172	Cellulophaga phage phi17:2			CG	dsDNA
GCA_000908075.1_ViralProj213017	Duplodnaviria	Heunggongvirae	Uroviricota	Caudoviricetes		Herelleviridae	Bastillevirinae	Nitunavirus	NA	Nitunavirus NIT1	Bacillus phage phiNIT1			CG	dsDNA
GCA_000908275.1_ViralProj198436	Duplodnaviria	Heunggongvirae	Uroviricota	Caudoviricetes		Kyanoviridae		Emcearvirus	NA	Emcearvirus gerard	Cyanophage P-RSM1			CG	dsDNA
GCA_000908475.1_ViralProj206033	Duplodnaviria	Heunggongvirae	Uroviricota	Caudoviricetes			Pclasvirinae	Fishburnevirus	NA	Fishburnevirus fishburne	Mycobacterium phage Fishburne			CG	dsDNA
GCA_000908595.1_ViralProj206484	Duplodnaviria	Heunggongvirae	Uroviricota	Caudoviricetes		Drexlerviridae	Tempevirinae	Hanrivervirus	NA	Hanrivervirus pSf1	Shigella phage pSf-1			CG	dsDNA
GCA_000908615.1_ViralProj206488	Duplodnaviria	Heunggongvirae	Uroviricota	Caudoviricetes		Peduoviridae		Nampongvirus	NA	Nampongvirus ST79	Burkholderia phage ST79			CG	dsDNA
GCA_000908635.1_ViralProj206492	Duplodnaviria	Heunggongvirae	Uroviricota	Caudoviricetes				Haloferacalesvirus	NA	Haloferacalesvirus hv5	Halorubrum tailed virus 5	HRTV-5		CG	dsDNA
GCA_000908675.1_ViralProj206500	Duplodnaviria	Heunggongvirae	Uroviricota	Caudoviricetes		Autographiviridae	Beijerinckvirinae	Friunavirus	NA	Friunavirus AB3	Acinetobacter phage AB3			CG	dsDNA
GCA_000908735.1_ViralProj209067	Duplodnaviria	Heunggongvirae	Uroviricota	Caudoviricetes		Kyanoviridae		Tefnutvirus	NA	Tefnutvirus siom18	Synechococcus phage S-IOM18			CG	dsDNA
GCA_000908895.1_ViralProj212712	Duplodnaviria	Heunggongvirae	Uroviricota	Caudoviricetes		Schitoviridae	Humphriesvirinae	Ithacavirus	NA	Pylasvirus pylas	Salmonella phage FSL SP-058			CG	dsDNA
GCA_000908935.1_ViralProj212942	Duplodnaviria	Heunggongvirae	Uroviricota	Caudoviricetes		Assiduviridae		Cellubavirus	NA	Cellubavirus phi19una	Cellulophaga phage phi19:1			CG	dsDNA
GCA_000909375.1_ViralProj209078	Duplodnaviria	Heunggongvirae	Uroviricota	Caudoviricetes				Psavirus	NA	Listeria virus LP302	Listeria phage LP-030-2			CG	dsDNA
GCA_000909515.1_ViralProj212711	Duplodnaviria	Heunggongvirae	Uroviricota	Caudoviricetes				Chivirus	NA	Chivirus FSLSP088	Salmonella phage FSL SP-088			CG	dsDNA
GCA_000909555.1_ViralProj212719	Duplodnaviria	Heunggongvirae	Uroviricota	Caudoviricetes		Schitoviridae	Humphriesvirinae	Ithacavirus	NA	Ithacavirus SP058	Salmonella phage FSL SP-076			CG	dsDNA
GCA_000909575.1_ViralProj212945	Duplodnaviria	Heunggongvirae	Uroviricota	Caudoviricetes		Pachyviridae		Baltivirus	NA	Baltivirus phi19tres	Cellulophaga phage phi19:3			CG	dsDNA
GCA_000909615.1_ViralProj212954	Duplodnaviria	Heunggongvirae	Uroviricota	Caudoviricetes	Crassvirales	Steigviridae	Asinivirinae	Akihdevirus	NA	Akihdevirus balticus	Cellulophaga phage phi14:2			CG	dsDNA
GCA_000909635.1_ViralProj212958	Duplodnaviria	Heunggongvirae	Uroviricota	Caudoviricetes		Pervagoviridae		Callevirus	NA	Callevirus phi38una	Cellulophaga phage phi38:1			CG	dsDNA
GCA_000909655.1_ViralProj212962	Duplodnaviria	Heunggongvirae	Uroviricota	Caudoviricetes				Helsingorvirus	NA	Helsingorvirus Cba171	Cellulophaga phage phi17:1			CG	dsDNA
GCA_000909675.1_ViralProj212966	Duplodnaviria	Heunggongvirae	Uroviricota	Caudoviricetes				Helsingorvirus	NA	Helsingorvirus Cba121	Cellulophaga phage phi12:1			CG	dsDNA
GCA_000910075.1_ViralProj206485	Duplodnaviria	Heunggongvirae	Uroviricota	Caudoviricetes		Salasmaviridae	Northropvirinae	Klosterneuburgvirus	NA	Klosterneuburgvirus MGB1	Bacillus phage MG-B1			CG	dsDNA
GCA_000910195.2_ViralProj209064	Duplodnaviria	Heunggongvirae	Uroviricota	Caudoviricetes		Straboviridae		Mylasvirus	NA	Mylasvirus persius	Vibrio phage nt-1			CG	dsDNA
GCA_000910415.1_ViralProj212717	Duplodnaviria	Heunggongvirae	Uroviricota	Caudoviricetes			Guernseyvirinae	Cornellvirus	NA	Cornellvirus SP31	Salmonella phage FSL SP-031			CG	dsDNA
GCA_000910475.1_ViralProj212952	Duplodnaviria	Heunggongvirae	Uroviricota	Caudoviricetes				Lightbulbvirus	NA	Lightbulbvirus Cba41	Cellulophaga phage phi4:1			CG	dsDNA
GCA_000910515.1_ViralProj212960	Duplodnaviria	Heunggongvirae	Uroviricota	Caudoviricetes		Pachyviridae		Baltivirus	NA	Baltivirus phi18tres	Cellulophaga phage phi18:3			CG	dsDNA
GCA_000910535.1_ViralProj212964	Duplodnaviria	Heunggongvirae	Uroviricota	Caudoviricetes		Assiduviridae		Cebadecemvirus	NA	Cebadecemvirus phi10una	Cellulophaga phage phi10:1			CG	dsDNA
GCA_000910615.1_ViralProj213076	Duplodnaviria	Heunggongvirae	Uroviricota	Caudoviricetes				Vedamuthuvirus	NA	Lactococcus virus BM13	Lactococcus phage BM13			CG	dsDNA
GCA_000910895.1_ViralProj215669	Duplodnaviria	Heunggongvirae	Uroviricota	Caudoviricetes		Herelleviridae	Twortvirinae	Silviavirus	NA	Silviavirus remus	Staphylococcus phage vB_SauM_Remus			CG	dsDNA
GCA_000911075.1_ViralProj219121	Duplodnaviria	Heunggongvirae	Uroviricota	Caudoviricetes			Bclasvirinae	Coopervirus	NA	Coopervirus adawi	Mycobacterium phage Adawi			CG	dsDNA
GCA_000911275.1_ViralProj227005	Duplodnaviria	Heunggongvirae	Uroviricota	Caudoviricetes				Junavirus	NA	Junavirus J1	Lactobacillus phage J-1			CG	dsDNA
GCA_000911315.1_ViralProj227116	Duplodnaviria	Heunggongvirae	Uroviricota	Caudoviricetes		Herelleviridae	Spounavirinae	Okubovirus	NA	Okubovirus camphawk	Bacillus phage CampHawk			CG	dsDNA
GCA_000911455.1_ViralProj229898	Duplodnaviria	Heunggongvirae	Uroviricota	Caudoviricetes		Autographiviridae		Jiaoyazivirus	NA	Jiaoyazivirus RSB3	Ralstonia phage RSB3			CG	dsDNA
GCA_000911535.1_ViralProj230586	Duplodnaviria	Heunggongvirae	Uroviricota	Caudoviricetes			Bclasvirinae	Pipefishvirus	NA	Pipefishvirus bernardo	Mycobacterium phage Bernardo			CG	dsDNA
GCA_000911595.1_ViralProj212959	Duplodnaviria	Heunggongvirae	Uroviricota	Caudoviricetes				Helsingorvirus	NA	Helsingorvirus Cba181	Cellulophaga phage phi18:1			CG	dsDNA
GCA_000911615.1_ViralProj212963	Duplodnaviria	Heunggongvirae	Uroviricota	Caudoviricetes		Pachyviridae		Bacelvirus	NA	Bacelvirus phi46tres	Cellulophaga phage phi46:3			CG	dsDNA
GCA_000911795.1_ViralProj215107	Duplodnaviria	Heunggongvirae	Uroviricota	Caudoviricetes				Papyrusvirus	NA	Mycobacterium virus Papyrus	Mycobacterium phage Papyrus			CG	dsDNA
GCA_000912255.1_ViralProj226726	Duplodnaviria	Heunggongvirae	Uroviricota	Caudoviricetes		Peduoviridae		Peduovirus	NA	Peduovirus fiAA91ss	Enterobacteria phage fiAA91-ss			CG	dsDNA
GCA_000912315.1_ViralProj227007	Duplodnaviria	Heunggongvirae	Uroviricota	Caudoviricetes				Junavirus	NA	Junavirus PL1	Lactobacillus phage PL-1			CG	dsDNA
GCA_000912335.1_ViralProj227113	Duplodnaviria	Heunggongvirae	Uroviricota	Caudoviricetes				Pagevirus	NA	Pagevirus page	Bacillus phage Page			CG	dsDNA
GCA_000912355.1_ViralProj227118	Duplodnaviria	Heunggongvirae	Uroviricota	Caudoviricetes		Herelleviridae	Bastillevirinae	Bequatrovirus	NA	Bequatrovirus bigbertha	Bacillus phage BigBertha			CG	dsDNA
GCA_000912395.1_ViralProj227127	Duplodnaviria	Heunggongvirae	Uroviricota	Caudoviricetes				Andromedavirus	NA	Andromedavirus blastoid	Bacillus phage Blastoid			CG	dsDNA
GCA_000912555.1_ViralProj215670	Duplodnaviria	Heunggongvirae	Uroviricota	Caudoviricetes				Baikalvirus	NA	Baikalvirus PaBG	Pseudomonas phage PaBG			CG	dsDNA
GCA_000912655.1_ViralProj219106	Duplodnaviria	Heunggongvirae	Uroviricota	Caudoviricetes		Ackermannviridae		Taipeivirus	NA	Taipeivirus 0507KN21	Klebsiella phage 0507-KN2-1			CG	dsDNA
GCA_000912715.2_ViralProj219118	Duplodnaviria	Heunggongvirae	Uroviricota	Caudoviricetes			Bclasvirinae	Coopervirus	NA	Coopervirus bane1	Mycobacterium phage Bane1			CG	dsDNA
GCA_000913015.1_ViralProj227126	Duplodnaviria	Heunggongvirae	Uroviricota	Caudoviricetes		Herelleviridae	Bastillevirinae	Nitunavirus	NA	Nitunavirus grass	Bacillus phage Grass			CG	dsDNA
GCA_000913195.1_ViralProj230587	Duplodnaviria	Heunggongvirae	Uroviricota	Caudoviricetes		Autographiviridae		Pradovirus	NA	Pradovirus prado	Xylella phage Prado			CG	dsDNA
GCA_000913315.1_ViralProj215120	Duplodnaviria	Heunggongvirae	Uroviricota	Caudoviricetes				Mapvirus	NA	Mycobacterium virus Muddy	Mycobacterium phage Muddy			CG	dsDNA
GCA_000913335.1_ViralProj215124	Duplodnaviria	Heunggongvirae	Uroviricota	Caudoviricetes				Corndogvirus	NA	Corndogvirus catdawg	Mycobacterium phage Catdawg			CG	dsDNA
GCA_000913755.1_ViralProj227004	Duplodnaviria	Heunggongvirae	Uroviricota	Caudoviricetes				Wumptrevirus	NA	Wumptrevirus PP	Cyanophage PP			CG	dsDNA
GCA_000913795.1_ViralProj227114	Duplodnaviria	Heunggongvirae	Uroviricota	Caudoviricetes				Slashvirus	NA	Bacillus virus Slash	Bacillus phage Slash			CG	dsDNA
GCA_000913835.1_ViralProj227124	Duplodnaviria	Heunggongvirae	Uroviricota	Caudoviricetes				Slashvirus	NA	Bacillus virus Staley	Bacillus phage Staley			CG	dsDNA
GCA_000913935.1_ViralProj229896	Duplodnaviria	Heunggongvirae	Uroviricota	Caudoviricetes				Firingavirus	NA	Firingavirus RSK1	Ralstonia phage RSK1			CG	dsRNA
GCA_000914135.1_ViralProj230605	Duplodnaviria	Heunggongvirae	Uroviricota	Caudoviricetes				Abouovirus	NA	Abouovirus davies	Brevibacillus phage Davies			CG	dsDNA
GCA_000914495.1_ViralProj239728	Duplodnaviria	Heunggongvirae	Uroviricota	Caudoviricetes		Straboviridae		Schizotequatrovirus	NA	Schizotequatrovirus vh7d	Vibrio phage VH7D			CG	dsDNA
GCA_000914555.1_ViralProj239740	Duplodnaviria	Heunggongvirae	Uroviricota	Caudoviricetes				Iapetusvirus	NA	Iapetusvirus EaH1	Erwinia phage PhiEaH1			CG	dsDNA
GCA_000914635.1_ViralProj240017	Duplodnaviria	Heunggongvirae	Uroviricota	Caudoviricetes				Agricanvirus	NA	Agricanvirus Ea3570	Erwinia phage Ea35-70			CG	dsDNA
GCA_000914715.1_ViralProj240033	Duplodnaviria	Heunggongvirae	Uroviricota	Caudoviricetes		Rountreeviridae	Rakietenvirinae	Rosenblumvirus	NA	Rosenblumvirus GRCS	Staphylococcus phage GRCS			CG	dsDNA
GCA_000914735.1_ViralProj240037	Duplodnaviria	Heunggongvirae	Uroviricota	Caudoviricetes				Cinunavirus	NA	Cinunavirus CN1A	Clavibbacter phage CN1A			CG	dsDNA
GCA_000914755.1_ViralProj240041	Duplodnaviria	Heunggongvirae	Uroviricota	Caudoviricetes				Eagleeyevirus	NA	Eagleeyevirus eagleeye	Mycobacterium phage EagleEye			CG	dsDNA
GCA_000914775.1_ViralProj240045	Duplodnaviria	Heunggongvirae	Uroviricota	Caudoviricetes		Schitoviridae	Rothmandenesvirinae	Jwalphavirus	NA	Jwalphavirus jwalpha	Achromobacter phage JWAlpha			CG	dsDNA
GCA_000914935.1_ViralProj240597	Duplodnaviria	Heunggongvirae	Uroviricota	Caudoviricetes		Drexlerviridae	Rogunavirinae	Lindendrivevirus	NA	Lindendrivevirus EB49	Escherichia phage phiEB49			CG	dsDNA
GCA_000914995.1_ViralProj229901	Duplodnaviria	Heunggongvirae	Uroviricota	Caudoviricetes		Autographiviridae	Okabevirinae	Mguuvirus	NA	Mguuvirus JG068	Burkholderia phage JG068			CG	dsDNA
GCA_000915095.1_ViralProj230592	Duplodnaviria	Heunggongvirae	Uroviricota	Caudoviricetes			Vequintavirinae	Seunavirus	NA	Seunavirus 4MG	Escherichia phage 4MG			CG	dsDNA
GCA_000915155.1_ViralProj230645	Duplodnaviria	Heunggongvirae	Uroviricota	Caudoviricetes				Yokohamavirus	NA	Yokohamavirus PEi21	Edwardsiella phage PEi21			CG	dsDNA
GCA_000915475.1_ViralProj239432	Duplodnaviria	Heunggongvirae	Uroviricota	Caudoviricetes		Herelleviridae	Bastillevirinae	Wphvirus	NA	Wphvirus BPS10C	Bacillus phage BPS10C			CG	dsDNA
GCA_000915495.1_ViralProj239722	Duplodnaviria	Heunggongvirae	Uroviricota	Caudoviricetes		Autographiviridae	Studiervirinae	Kayfunavirus	NA	Kayfunavirus Dev2	Cronobacter phage Dev2			CG	dsDNA
GCA_000915535.1_ViralProj239730	Duplodnaviria	Heunggongvirae	Uroviricota	Caudoviricetes		Autographiviridae	Studiervirinae	Kayfunavirus	NA	Kayfunavirus CR44b	Citrobacter phage CR44b			CG	dsDNA
GCA_000915655.1_ViralProj240015	Duplodnaviria	Heunggongvirae	Uroviricota	Caudoviricetes				Trigintaduovirus	NA	Trigintaduovirus 32HC	Trigintaduovirus 32HC			CG	dsDNA
GCA_000915715.1_ViralProj240027	Duplodnaviria	Heunggongvirae	Uroviricota	Caudoviricetes				Lokivirus	NA	Acinetobacter virus IMEAB3	Acinetobacter phage IMEAB3			CG	dsDNA
GCA_000915755.1_ViralProj240035	Duplodnaviria	Heunggongvirae	Uroviricota	Caudoviricetes				Sextaecvirus	NA	Staphylococcus virus SEP9	Staphylococcus phage vB_SepS_SEP9			CG	dsDNA
GCA_000916175.1_ViralProj239725	Duplodnaviria	Heunggongvirae	Uroviricota	Caudoviricetes				Sozzivirus	NA	Oenococcus virus phi9805	Oenococcus phage phi9805			CG	dsDNA
GCA_000916195.1_ViralProj239729	Duplodnaviria	Heunggongvirae	Uroviricota	Caudoviricetes				Sozzivirus	NA	Oenococcus virus phiS11	Oenococcus phage phiS11			CG	dsDNA
GCA_000916215.1_ViralProj239733	Duplodnaviria	Heunggongvirae	Uroviricota	Caudoviricetes				Sozzivirus	NA	Oenococcus virus phiS13	Oenococcus phage phiS13			CG	dsDNA
GCA_000916255.2_ViralProj239741	Duplodnaviria	Heunggongvirae	Uroviricota	Caudoviricetes				Otagovirus	NA	Otagovirus Psa374	Pseudomonas phage phiPsa374			CG	dsDNA
GCA_000916275.1_ViralProj240006	Duplodnaviria	Heunggongvirae	Uroviricota	Caudoviricetes			Bclasvirinae	Julieunavirus	NA	Julieunavirus julie1	Mycobacterium phage Julie1			CG	dsDNA
GCA_000916355.1_ViralProj240022	Duplodnaviria	Heunggongvirae	Uroviricota	Caudoviricetes				Camtrevirus	NA	Camtrevirus CM3	Bacillus phage phiCM3			CG	dsDNA
GCA_000916415.1_ViralProj240034	Duplodnaviria	Heunggongvirae	Uroviricota	Caudoviricetes		Autographiviridae	Slopekvirinae	Drulisvirus	NA	Drulisvirus F19	Klebsiella phage F19			CG	dsDNA
GCA_000916495.1_ViralProj240050	Duplodnaviria	Heunggongvirae	Uroviricota	Caudoviricetes		Autographiviridae	Beijerinckvirinae	Pettyvirus	NA	Pettyvirus petty	Acinetobacter phage Petty			CG	dsDNA
GCA_000916695.1_ViralProj230850	Duplodnaviria	Heunggongvirae	Uroviricota	Caudoviricetes		Autographiviridae	Studiervirinae	Phutvirus	NA	Phutvirus PPpW4	Pseudomonas phage PPpW-4			CG	dsDNA
GCA_000917035.1_ViralProj239727	Duplodnaviria	Heunggongvirae	Uroviricota	Caudoviricetes		Autographiviridae	Studiervirinae	Caroctavirus	NA	Caroctavirus CR8	Citrobacter phage CR8			CG	dsDNA
GCA_000917135.1_ViralProj240008	Duplodnaviria	Heunggongvirae	Uroviricota	Caudoviricetes				Santafevirus	NA	Santafevirus sf40AC	Mycobacterium phage 40AC			CG	dsDNA
GCA_000917155.1_ViralProj240012	Duplodnaviria	Heunggongvirae	Uroviricota	Caudoviricetes			Gclasvirinae	Jolieduovirus	NA	Jolieduovirus jolie2	Mycobacterium phage Jolie2			CG	dsDNA
GCA_000917175.1_ViralProj240016	Duplodnaviria	Heunggongvirae	Uroviricota	Caudoviricetes				Rigallicvirus	NA	Rhizobium virus P106B	Rhizobium phage vB_RglS_P106B			CG	dsDNA
GCA_000917195.1_ViralProj240020	Duplodnaviria	Heunggongvirae	Uroviricota	Caudoviricetes			Pclasvirinae	Fishburnevirus	NA	Fishburnevirus donovan	Mycobacterium phage Donovan			CG	dsDNA
GCA_000917215.2_ViralProj240024	Duplodnaviria	Heunggongvirae	Uroviricota	Caudoviricetes		Chaseviridae	Nefertitivirinae	Yushanvirus	NA	Yushanvirus Spp001	Shewanella phage Spp001			CG	dsDNA
GCA_000917295.1_ViralProj240040	Duplodnaviria	Heunggongvirae	Uroviricota	Caudoviricetes		Schitoviridae	Erskinevirinae	Johnsonvirus	NA	Yonginvirus EaP8	Erwinia phage Ea9-2			CG	dsDNA
GCA_000917315.1_ViralProj240044	Duplodnaviria	Heunggongvirae	Uroviricota	Caudoviricetes		Kyanoviridae		Acionnavirus	NA	Acionnavirus monteraybay	Synechococcus phage S-MbCM100			CG	dsDNA
GCA_000917335.1_ViralProj240048	Duplodnaviria	Heunggongvirae	Uroviricota	Caudoviricetes		Schitoviridae		Presleyvirus	NA	Presleyvirus presley	Acinetobacter phage Presley			CG	dsDNA
GCA_000917355.1_ViralProj240053	Duplodnaviria	Heunggongvirae	Uroviricota	Caudoviricetes		Peduoviridae		Simpcentumvirus	NA	Simpcentumvirus Smp131	Stenotrophomonas phage Smp131			CG	dsDNA
GCA_000917535.1_ViralProj240716	Duplodnaviria	Heunggongvirae	Uroviricota	Caudoviricetes				Donellivirus	NA	Donellivirus gee	Bacillus phage G			CG	dsDNA
GCA_000917595.1_ViralProj240728	Duplodnaviria	Heunggongvirae	Uroviricota	Caudoviricetes			Ceeclamvirinae	Bixzunavirus	NA	Bixzunavirus dandelion	Mycobacterium phage Dandelion			CG	dsDNA
GCA_000917635.1_ViralProj240736	Duplodnaviria	Heunggongvirae	Uroviricota	Caudoviricetes			Gracegardnervirinae	Avanivirus	NA	Avanivirus avani	Mycobacterium phage Avani			CG	dsDNA
GCA_000917695.1_ViralProj240748	Duplodnaviria	Heunggongvirae	Uroviricota	Caudoviricetes				Hnatkovirus	NA	Hnatkovirus DS6A	Mycobacterium phage DS6A			CG	dsDNA
GCA_000917755.1_ViralProj240760	Duplodnaviria	Heunggongvirae	Uroviricota	Caudoviricetes			Bclasvirinae	Pipefishvirus	NA	Pipefishvirus gadjet	Mycobacterium phage Gadjet			CG	dsDNA
GCA_000917775.1_ViralProj240767	Duplodnaviria	Heunggongvirae	Uroviricota	Caudoviricetes				Fromanvirus	NA	Fromanvirus alma	Mycobacterium phage Alma			CG	dsDNA
GCA_000917955.1_ViralProj243066	Duplodnaviria	Heunggongvirae	Uroviricota	Caudoviricetes				Farahnazvirus	NA	Farahnazvirus ISF9	Microbacterium vB_MoxS-ISF9			CG	dsDNA
GCA_000918235.1_ViralProj248320	Duplodnaviria	Heunggongvirae	Uroviricota	Caudoviricetes				Kochitakasuvirus	NA	Kochitakasuvirus KPP25	Pseudomonas phage KPP25			CG	dsDNA
GCA_000918275.1_ViralProj248534	Duplodnaviria	Heunggongvirae	Uroviricota	Caudoviricetes		Schitoviridae	Migulavirinae	Litunavirus	NA	Litunavirus LIT1	Pseudomonas phage vB_PaeP_C2-10_Ab09			CG	dsDNA
GCA_000918315.1_ViralProj248632	Duplodnaviria	Heunggongvirae	Uroviricota	Caudoviricetes		Herelleviridae	Bastillevirinae	Caeruleovirus	NA	Caeruleovirus Bcp1	Bacillus phage Bcp1			CG	dsDNA
GCA_000918375.1_ViralProj240047	Duplodnaviria	Heunggongvirae	Uroviricota	Caudoviricetes		Kyanoviridae		Sedonavirus	NA	Sedonavirus tusconh	Synechococcus phage ACG-2014h			CG	dsDNA
GCA_000918515.1_ViralProj240595	Duplodnaviria	Heunggongvirae	Uroviricota	Caudoviricetes		Autographiviridae		Kelmasvirus	NA	Kelmasvirus RSB2	Ralstonia phage RSB2			CG	dsDNA
GCA_000918575.1_ViralProj240722	Duplodnaviria	Heunggongvirae	Uroviricota	Caudoviricetes			Gclasvirinae	Liefievirus	NA	Mycobacterium virus Liefie	Mycobacterium phage Liefie			CG	dsDNA
GCA_000918715.1_ViralProj240750	Duplodnaviria	Heunggongvirae	Uroviricota	Caudoviricetes				Pepyhexavirus	NA	Rhodococcus virus Pepy6	Rhodococcus phage ReqiPepy6			CG	dsDNA
GCA_000918735.1_ViralProj240754	Duplodnaviria	Heunggongvirae	Uroviricota	Caudoviricetes				Corndogvirus	NA	Corndogvirus firecracker	Mycobacterium phage Firecracker			CG	dsDNA
GCA_000918795.1_ViralProj240769	Duplodnaviria	Heunggongvirae	Uroviricota	Caudoviricetes				Omegavirus	NA	Mycobacterium virus Courthouse	Mycobacterium phage Courthouse			CG	dsDNA
GCA_000919215.1_ViralProj240721	Duplodnaviria	Heunggongvirae	Uroviricota	Caudoviricetes			Pclasvirinae	Bignuzvirus	NA	Bignuzvirus bignuz	Mycobacterium phage BigNuz			CG	dsDNA
GCA_000919255.1_ViralProj240729	Duplodnaviria	Heunggongvirae	Uroviricota	Caudoviricetes				Turbidovirus	NA	Turbidovirus turbido	Mycobacterium phage Turbido			CG	dsDNA
GCA_000919295.1_ViralProj240737	Duplodnaviria	Heunggongvirae	Uroviricota	Caudoviricetes			Bclasvirinae	Pegunavirus	NA	Pegunavirus oline	Mycobacterium phage Oline			CG	dsDNA
GCA_000919915.2_ViralProj248321	Duplodnaviria	Heunggongvirae	Uroviricota	Caudoviricetes		Straboviridae	Tevenvirinae	Mosigvirus	NA	Mosigvirus JS09	Escherichia phage vB_EcoM_JS09			CG	dsDNA
GCA_000919935.1_ViralProj248531	Duplodnaviria	Heunggongvirae	Uroviricota	Caudoviricetes			Vequintavirinae	Vequintavirus	NA	Vequintavirus FFH2	Escherichia phage FFH2			CG	dsDNA
GCA_000919955.1_ViralProj248625	Duplodnaviria	Heunggongvirae	Uroviricota	Caudoviricetes		Rountreeviridae		Negarvirus	NA	Negarvirus WP2	Lactococcus phage WP-2			CG	dsDNA
GCA_000919975.1_ViralProj248629	Duplodnaviria	Heunggongvirae	Uroviricota	Caudoviricetes				Marvinvirus	NA	Mycobacterium virus Mosmoris	Mycobacterium phage MosMoris			CG	dsDNA
GCA_000919995.1_ViralProj248633	Duplodnaviria	Heunggongvirae	Uroviricota	Caudoviricetes				Bernalvirus	NA	Bernalvirus bernal13	Mycobacterium phage Bernal13			CG	dsDNA
GCA_000920075.1_ViralProj240723	Duplodnaviria	Heunggongvirae	Uroviricota	Caudoviricetes				Patiencevirus	NA	Mycobacterium virus Patience	Mycobacterium phage Patience			CG	dsDNA
GCA_000920195.1_ViralProj240747	Duplodnaviria	Heunggongvirae	Uroviricota	Caudoviricetes		Straboviridae		Angelvirus	NA	Angelvirus px29	Aeromonas phage PX29			CG	dsDNA
GCA_000920215.1_ViralProj240751	Duplodnaviria	Heunggongvirae	Uroviricota	Caudoviricetes				Pepyhexavirus	NA	Rhodococcus virus Poco6	Rhodococcus phage ReqiPoco6			CG	dsDNA
GCA_000920235.1_ViralProj240755	Duplodnaviria	Heunggongvirae	Uroviricota	Caudoviricetes			Vequintavirinae	Certrevirus	NA	Certrevirus CR9	Cronobacter phage CR9			CG	dsDNA
GCA_000920275.1_ViralProj240766	Duplodnaviria	Heunggongvirae	Uroviricota	Caudoviricetes			Chebruvirinae	Brujitavirus	NA	Brujitavirus babsiella	Mycobacterium phage Babsiella			CG	dsDNA
GCA_000920315.1_ViralProj240774	Duplodnaviria	Heunggongvirae	Uroviricota	Caudoviricetes			Bclasvirinae	Acadianvirus	NA	Acadianvirus acadian	Mycobacterium phage Acadian			CG	dsDNA
GCA_000920475.1_ViralProj243247	Duplodnaviria	Heunggongvirae	Uroviricota	Caudoviricetes		Chaseviridae	Cleopatravirinae	Suwonvirus	NA	Suwonvirus PM1	Pectobacterium phage PM1			CG	dsDNA
GCA_000920775.1_ViralProj248461	Duplodnaviria	Heunggongvirae	Uroviricota	Caudoviricetes				Muldoonvirus	NA	Muldoonvirus PS2	Serratia phage PS2			CG	dsDNA
GCA_000920835.1_ViralProj248631	Duplodnaviria	Heunggongvirae	Uroviricota	Caudoviricetes			Weiservirinae	Timquatrovirus	NA	Timquatrovirus zoeJ	Mycobacterium phage ZoeJ			CG	dsDNA
GCA_000920935.1_ViralProj249094	Duplodnaviria	Heunggongvirae	Uroviricota	Caudoviricetes		Herelleviridae	Bastillevirinae	Bastillevirus	NA	Bastillevirus CAM003	Bacillus phage CAM003			CG	dsDNA
GCA_000920975.1_ViralProj251394	Duplodnaviria	Heunggongvirae	Uroviricota	Caudoviricetes			Dclasvirinae	Hawkeyevirus	NA	Hawkeyevirus hawkeye	Mycobacterium phage Hawkeye			CG	dsDNA
GCA_000921075.1_ViralProj253318	Duplodnaviria	Heunggongvirae	Uroviricota	Caudoviricetes				Sextaecvirus	NA	Staphylococcus virus Sextaec	Staphylococcus phage 6ec			CG	dsDNA
GCA_000921095.1_ViralProj253322	Duplodnaviria	Heunggongvirae	Uroviricota	Caudoviricetes		Autographiviridae	Studiervirinae	Ghunavirus	NA	Ghunavirus PSA2	Pseudomonas phage phiPSA2			CG	dsDNA
GCA_000921155.1_ViralProj253384	Duplodnaviria	Heunggongvirae	Uroviricota	Caudoviricetes				Homburgvirus	NA	Homburgvirus LP114	Listeria phage LP-114			CG	dsDNA
GCA_000921175.1_ViralProj253388	Duplodnaviria	Heunggongvirae	Uroviricota	Caudoviricetes			Mccleskeyvirinae	Unaquatrovirus	NA	Unaquatrovirus LN34	Leuconostoc virus LN34			CG	dsDNA
GCA_000921635.1_ViralProj260420	Duplodnaviria	Heunggongvirae	Uroviricota	Caudoviricetes		Drexlerviridae	Rogunavirinae	Rogunavirus	NA	Rogunavirus AHS24	Escherichia phage vB_EcoS_AHS24			CG	dsDNA
GCA_000921655.1_ViralProj260453	Duplodnaviria	Heunggongvirae	Uroviricota	Caudoviricetes		Herelleviridae	Bastillevirinae	Agatevirus	NA	Agatevirus bobb	Bacillus phage Bobb			CG	dsDNA
GCA_000921675.1_ViralProj260482	Duplodnaviria	Heunggongvirae	Uroviricota	Caudoviricetes		Drexlerviridae	Rogunavirinae	Rogunavirus	NA	Rogunavirus AHP42	Escherichia phage vB_EcoS_AHP42			CG	dsDNA
GCA_000921915.1_ViralProj253319	Duplodnaviria	Heunggongvirae	Uroviricota	Caudoviricetes				Homburgvirus	NA	Homburgvirus LP26	Listeria phage LP-026			CG	dsDNA
GCA_000922055.1_ViralProj253397	Duplodnaviria	Heunggongvirae	Uroviricota	Caudoviricetes			Mccleskeyvirinae	Unaquatrovirus	NA	Unaquatrovirus LN25	Leuconostoc virus LN25			CG	dsDNA
GCA_000922495.1_ViralProj260479	Duplodnaviria	Heunggongvirae	Uroviricota	Caudoviricetes				Dhillonvirus	NA	Dhillonvirus EK99P1	Escherichia phage EK99P-1			CG	dsDNA
GCA_000922515.1_ViralProj260483	Duplodnaviria	Heunggongvirae	Uroviricota	Caudoviricetes		Schitoviridae	Enquartavirinae	Gamaleyavirus	NA	Gamaleyavirus APEC5	Escherichia phage vB_EcoP_PhAPEC5			CG	dsDNA
GCA_000922715.1_ViralProj248532	Duplodnaviria	Heunggongvirae	Uroviricota	Caudoviricetes				Yongloolinvirus	NA	Yongloolinvirus CDMH1	Clostridium phage CDMH1			CG	dsDNA
GCA_000922815.1_ViralProj249092	Duplodnaviria	Heunggongvirae	Uroviricota	Caudoviricetes		Herelleviridae	Bastillevirinae	Wphvirus	NA	Wphvirus hakuna	Bacillus phage Hakuna			CG	dsDNA
GCA_000922835.1_ViralProj249096	Duplodnaviria	Heunggongvirae	Uroviricota	Caudoviricetes		Herelleviridae	Bastillevirinae	Bastillevirus	NA	Bastillevirus evoli	Bacillus phage Evoli			CG	dsDNA
GCA_000922975.1_ViralProj253320	Duplodnaviria	Heunggongvirae	Uroviricota	Caudoviricetes			Bclasvirinae	Pegunavirus	NA	Pegunavirus manad	Mycobacterium phage Manad			CG	dsDNA
GCA_000923015.1_ViralProj253328	Duplodnaviria	Heunggongvirae	Uroviricota	Caudoviricetes		Schitoviridae	Rhodovirinae	Baltimorevirus	NA	Baltimorevirus DFL12	Dinoroseobacter phage DFL12phi1			CG	dsDNA
GCA_000923035.1_ViralProj253340	Duplodnaviria	Heunggongvirae	Uroviricota	Caudoviricetes				Septimatrevirus	NA	Pseudomonas virus Ab26	Pseudomonas phage vB_PaeS_SCH_Ab26			CG	dsDNA
GCA_000923055.1_ViralProj253386	Duplodnaviria	Heunggongvirae	Uroviricota	Caudoviricetes			Mccleskeyvirinae	Limdunavirus	NA	Leuconostoc virus LN6B	Leuconostoc phage phiLN6B			CG	dsDNA
GCA_000923075.1_ViralProj253390	Duplodnaviria	Heunggongvirae	Uroviricota	Caudoviricetes			Trabyvirinae	Slepowronvirus	NA	Slepowronvirus LP101	Listeria phage LP-101			CG	dsDNA
GCA_000923575.1_ViralProj253221	Duplodnaviria	Heunggongvirae	Uroviricota	Caudoviricetes		Herelleviridae	Jasinkavirinae	Pecentumvirus	NA	Pecentumvirus list36	Listeria phage List-36			CG	dsDNA
GCA_000923615.1_ViralProj253321	Duplodnaviria	Heunggongvirae	Uroviricota	Caudoviricetes				Kozyakovvirus	NA	Kozyakovvirus A4L	Anabaena phage A-4L			CG	dsDNA
GCA_000923635.1_ViralProj253325	Duplodnaviria	Heunggongvirae	Uroviricota	Caudoviricetes			Vequintavirinae	Certrevirus	NA	Certrevirus CR8	Cronobacter phage CR8			CG	dsDNA
GCA_000923735.1_ViralProj253395	Duplodnaviria	Heunggongvirae	Uroviricota	Caudoviricetes			Mccleskeyvirinae	Limdunavirus	NA	Limdunavirus LN03	Leuconostoc virus LN03			CG	dsDNA
GCA_000924195.1_ViralProj260481	Duplodnaviria	Heunggongvirae	Uroviricota	Caudoviricetes		Drexlerviridae	Rogunavirinae	Rogunavirus	NA	Rogunavirus AKS96	Escherichia phage vB_EcoS_AKS96			CG	dsDNA
GCA_000924215.1_ViralProj260485	Duplodnaviria	Heunggongvirae	Uroviricota	Caudoviricetes		Schitoviridae	Enquartavirinae	Gamaleyavirus	NA	Gamaleyavirus APEC7	Escherichia phage vB_EcoP_PhAPEC7			CG	dsDNA
GCA_000924355.1_ViralProj262488	Duplodnaviria	Heunggongvirae	Uroviricota	Caudoviricetes		Peduoviridae		Arsyunavirus	NA	Arsyunavirus RSY1	Ralstonia phage RSY1			CG	dsDNA
GCA_000924895.1_ViralProj266648	Duplodnaviria	Heunggongvirae	Uroviricota	Caudoviricetes				Cequinquevirus	NA	Cequinquevirus Ld25A	Lactobacillus phage Ld25A			CG	dsDNA
GCA_000924915.1_ViralProj266711	Duplodnaviria	Heunggongvirae	Uroviricota	Caudoviricetes		Ackermannviridae	Aglimvirinae	Limestonevirus	NA	Limestonevirus RC2014	Dickeya phage RC-2014			CG	dsDNA
GCA_000924995.1_ViralProj266774	Duplodnaviria	Heunggongvirae	Uroviricota	Caudoviricetes		Autographiviridae		Pairvirus	NA	Pairvirus Lo5R7ANS	Mesorhizobium phage vB_MloP_Lo5R7ANS			CG	dsDNA
GCA_000925075.1_ViralProj266790	Duplodnaviria	Heunggongvirae	Uroviricota	Caudoviricetes		Autographiviridae		Kembevirus	NA	Kembevirus SCBP2	Synechococcus phage S-CBP2			CG	dsDNA
GCA_000925695.1_ViralProj266641	Duplodnaviria	Heunggongvirae	Uroviricota	Caudoviricetes				Waukeshavirus	NA	Bacillus virus Waukesha92	Bacillus phage Waukesha92			CG	dsDNA
GCA_000925715.1_ViralProj266645	Duplodnaviria	Heunggongvirae	Uroviricota	Caudoviricetes		Autographiviridae	Slopekvirinae	Drulisvirus	NA	Drulisvirus K244	Klebsiella phage NTUH-K2044-K1-1			CG	dsDNA
GCA_000925735.1_ViralProj266649	Duplodnaviria	Heunggongvirae	Uroviricota	Caudoviricetes				Cequinquevirus	NA	Cequinquevirus Ld17	Lactobacillus phage Ld17			CG	dsDNA
GCA_000925775.1_ViralProj266716	Duplodnaviria	Heunggongvirae	Uroviricota	Caudoviricetes			Sepvirinae	Diegovirus	NA	Diegovirus POCJ13	Shigella phage POCJ13			CG	dsDNA
GCA_000925795.1_ViralProj266720	Duplodnaviria	Heunggongvirae	Uroviricota	Caudoviricetes				Wifcevirus	NA	Wifcevirus ECML117	Escherichia phage ECML-117			CG	dsDNA
GCA_000926095.1_ViralProj260480	Duplodnaviria	Heunggongvirae	Uroviricota	Caudoviricetes				Obolenskvirus	NA	Obolenskvirus AbC62	Acinetobacter phage YMC-13-01-C62			CG	dsDNA
GCA_000926715.1_ViralProj266636	Duplodnaviria	Heunggongvirae	Uroviricota	Caudoviricetes		Straboviridae	Tevenvirinae	Krischvirus	NA	Krischvirus gec3s	Enterobacteria phage GEC-3S			CG	dsDNA
GCA_000926735.1_ViralProj266642	Duplodnaviria	Heunggongvirae	Uroviricota	Caudoviricetes		Herelleviridae	Spounavirinae	Siminovitchvirus	NA	Siminovitchvirus CP51	Bacillus phage CP-51			CG	dsDNA
GCA_000926855.1_ViralProj266768	Duplodnaviria	Heunggongvirae	Uroviricota	Caudoviricetes				Asteriusvirus	NA	Asteriusvirus av121Q	Escherichia phage 121Q			CG	dsDNA
GCA_000926875.1_ViralProj266772	Duplodnaviria	Heunggongvirae	Uroviricota	Caudoviricetes		Autographiviridae	Studiervirinae	Teetrevirus	NA	Teetrevirus AP5	Yersinia phage vB_YenP_AP5			CG	dsDNA
GCA_000927415.1_ViralProj266714	Duplodnaviria	Heunggongvirae	Uroviricota	Caudoviricetes		Autographiviridae		Bonnellvirus	NA	Bonnellvirus J865	Escherichia phage J8-65			CG	dsDNA
GCA_000927475.1_ViralProj266769	Duplodnaviria	Heunggongvirae	Uroviricota	Caudoviricetes		Autographiviridae	Molineuxvirinae	Tuodvirus	NA	Tuodvirus phD2B	Lelliottia phage phD2B			CG	dsDNA
GCA_000927515.1_ViralProj266777	Duplodnaviria	Heunggongvirae	Uroviricota	Caudoviricetes		Autographiviridae	Beijerinckvirinae	Daemvirus	NA	Daemvirus acibel007	Acinetobacter phage vB_AbaP_Acibel007			CG	dsDNA
GCA_000927575.1_ViralProj266789	Duplodnaviria	Heunggongvirae	Uroviricota	Caudoviricetes				Nonanavirus	NA	Salmonella virus 9NA	Salmonella phage 9NA			CG	dsDNA
GCA_000928035.1_ViralProj269770	Duplodnaviria	Heunggongvirae	Uroviricota	Caudoviricetes			Vequintavirinae	Avunavirus	NA	Avunavirus Av05	Escherichia phage Av-05			CG	dsDNA
GCA_000928875.1_ViralProj269621	Duplodnaviria	Heunggongvirae	Uroviricota	Caudoviricetes		Autographiviridae	Colwellvirinae	Kaohsiungvirus	NA	Kaohsiungvirus A318	Vibrio phage phi-A318			CG	dsDNA
GCA_000929475.1_ViralProj266776	Duplodnaviria	Heunggongvirae	Uroviricota	Caudoviricetes		Chaseviridae	Nefertitivirinae	Pahsextavirus	NA	Pahsextavirus pAh6C	Aeromonas phage pAh6-C			CG	dsDNA
GCA_000930115.1_ViralProj271780	Duplodnaviria	Heunggongvirae	Uroviricota	Caudoviricetes		Peduoviridae		Xuanwuvirus	NA	Xuanwuvirus P88	Escherichia phage P88			CG	dsDNA
GCA_000930755.1_ViralProj271781	Duplodnaviria	Heunggongvirae	Uroviricota	Caudoviricetes			Bronfenbrennervirinae	Biseptimavirus	NA	Biseptimavirus BU01	Staphylococcus phage phiBU01			CG	dsDNA
GCA_000954275.1_ViralProj276859	Duplodnaviria	Heunggongvirae	Uroviricota	Caudoviricetes		Mesyanzhinovviridae	Bradleyvirinae	Abidjanvirus	NA	Pseudomonas virus Ab18	Pseudomonas phage vB_PaeS_PAO1_Ab18			CG	dsDNA
GCA_000954295.1_ViralProj276863	Duplodnaviria	Heunggongvirae	Uroviricota	Caudoviricetes				Gofduovirus	NA	Gofduovirus GF2	Edwardsiella phage GF-2			CG	dsDNA
GCA_000954315.1_ViralProj276867	Duplodnaviria	Heunggongvirae	Uroviricota	Caudoviricetes				Chenonavirus	NA	Chenonavirus sbash	Mycobacterium phage Sbash			CG	dsDNA
GCA_000954375.1_ViralProj276879	Duplodnaviria	Heunggongvirae	Uroviricota	Caudoviricetes			Gracegardnervirinae	Squirtyvirus	NA	Mycobacterium virus Squirty	Mycobacterium phage Squirty			CG	dsDNA
GCA_000954635.1_ViralProj276860	Duplodnaviria	Heunggongvirae	Uroviricota	Caudoviricetes		Autographiviridae	Krylovirinae	Phikmvvirus	NA	Phikmvvirus Ab05	Pseudomonas phage vB_PaeP_PAO1_Ab05			CG	dsDNA
GCA_000954695.1_ViralProj276872	Duplodnaviria	Heunggongvirae	Uroviricota	Caudoviricetes				Klausavirus	NA	Klausavirus ArV1	Arthrobacter phage vB_ArtM-ArV1			CG	dsDNA
GCA_000954995.1_ViralProj276858	Duplodnaviria	Heunggongvirae	Uroviricota	Caudoviricetes				Bruynoghevirus	NA	Bruynoghevirus Ab22	Pseudomonas phage vB_PaeP_C2-10_Ab22			CG	dsDNA
GCA_000955055.1_ViralProj276870	Duplodnaviria	Heunggongvirae	Uroviricota	Caudoviricetes			Weiservirinae	Keshuvirus	NA	Keshuvirus keshu	Mycobacterium phage Keshu			CG	dsDNA
GCA_000955315.1_ViralProj276850	Duplodnaviria	Heunggongvirae	Uroviricota	Caudoviricetes				Gaiavirus	NA	Gaiavirus gaia	Mycobacterium phage Gaia			CG	dsDNA
GCA_000955335.1_ViralProj276857	Duplodnaviria	Heunggongvirae	Uroviricota	Caudoviricetes				Pbunavirus	NA	Pbunavirus Ab28	Pseudomonas phage vB_PaeM_C1-14_Ab28			CG	dsDNA
GCA_000955355.1_ViralProj276861	Duplodnaviria	Heunggongvirae	Uroviricota	Caudoviricetes				Nankokuvirus	NA	Nankokuvirus Ab03	Pseudomonas phage vB_PaeM_PAO1_Ab03			CG	dsDNA
GCA_000955415.1_ViralProj276873	Duplodnaviria	Heunggongvirae	Uroviricota	Caudoviricetes			Tybeckvirinae	Lidleunavirus	NA	Lidleunavirus Ldl1	Lactobacillus phage Ldl1			CG	dsDNA
GCA_000955455.1_ViralProj276881	Duplodnaviria	Heunggongvirae	Uroviricota	Caudoviricetes				Sparkyvirus	NA	Mycobacterium virus Sparky	Mycobacterium phage Sparky			CG	dsDNA
GCA_000982345.1_ViralProj282478	Duplodnaviria	Heunggongvirae	Uroviricota	Caudoviricetes		Kyanoviridae		Macariavirus	NA	Macariavirus tuscon14g	Synechococcus phage ACG-2014g			CG	dsDNA
GCA_001015265.1_ViralProj284783	Duplodnaviria	Heunggongvirae	Uroviricota	Caudoviricetes				Enhodamvirus	NA	Enhodamvirus VC8	Vibrio phage phiVC8			CG	dsDNA
GCA_001015285.1_ViralProj285253	Duplodnaviria	Heunggongvirae	Uroviricota	Caudoviricetes		Ackermannviridae	Cvivirinae	Kuttervirus	NA	Kuttervirus Det7	Salmonella phage Det7			CG	dsDNA
GCA_001015305.1_ViralProj284805	Duplodnaviria	Heunggongvirae	Uroviricota	Caudoviricetes				Whiteheadvirus	NA	Lactococcus virus 1358	Lactococcus phage 1358			CG	dsDNA
GCA_001019815.1_ViralProj284804	Duplodnaviria	Heunggongvirae	Uroviricota	Caudoviricetes				Ficleduovirus	NA	Ficleduovirus FCL2	Flavobacterium phage FCL-2			CG	dsDNA
GCA_001019995.1_ViralProj285603	Duplodnaviria	Heunggongvirae	Uroviricota	Caudoviricetes		Kyanoviridae		Chalconvirus	NA	Chalconvirus acg2014i	Synechococcus phage ACG-2014i			CG	dsDNA
GCA_001023565.1_ViralProj286159	Duplodnaviria	Heunggongvirae	Uroviricota	Caudoviricetes				Emdodecavirus	NA	Emdodecavirus M12	Sinorhizobium phage phiM12			CG	dsDNA
GCA_001038595.1_ViralProj287583	Duplodnaviria	Heunggongvirae	Uroviricota	Caudoviricetes		Autographiviridae	Studiervirinae	Pifdecavirus	NA	Pifdecavirus Pf10	Pseudomonas phage Pf-10			CG	dsDNA
GCA_001040975.1_ViralProj287953	Duplodnaviria	Heunggongvirae	Uroviricota	Caudoviricetes		Autographiviridae		Gajwadongvirus	NA	Gajwadongvirus ECBP5	Escherichia phage ECBP5			CG	dsDNA
GCA_001041015.1_ViralProj287961	Duplodnaviria	Heunggongvirae	Uroviricota	Caudoviricetes		Herelleviridae	Brockvirinae	Kochikohdavirus	NA	Kochikohdavirus ECP3	Enterococcus phage ECP3			CG	dsDNA
GCA_001041035.1_ViralProj287965	Duplodnaviria	Heunggongvirae	Uroviricota	Caudoviricetes				Asteriusvirus	NA	Asteriusvirus PBECO4	Escherichia phage PBECO4			CG	dsDNA
GCA_001041115.1_ViralProj287985	Duplodnaviria	Heunggongvirae	Uroviricota	Caudoviricetes		Drexlerviridae	Tempevirinae	Tlsvirus	NA	Tlsvirus stevie	Citrobacter phage Stevie			CG	dsDNA
GCA_001041355.1_ViralProj287954	Duplodnaviria	Heunggongvirae	Uroviricota	Caudoviricetes		Ackermannviridae		Nezavisimistyvirus	NA	Nezavisimistyvirus Ea2809	Erwinia phage phiEa2809			CG	dsDNA
GCA_001041375.1_ViralProj287958	Duplodnaviria	Heunggongvirae	Uroviricota	Caudoviricetes		Autographiviridae	Studiervirinae	Teseptimavirus	NA	Teseptimavirus CICC80001	Escherichia phage CICC 80001			CG	dsDNA
GCA_001041395.1_ViralProj287962	Duplodnaviria	Heunggongvirae	Uroviricota	Caudoviricetes		Peduoviridae		Vulnificusvirus	NA	Vulnificusvirus PV94	Vibrio phage PV94			CG	dsDNA
GCA_001041455.1_ViralProj287978	Duplodnaviria	Heunggongvirae	Uroviricota	Caudoviricetes		Autographiviridae	Molineuxvirinae	Acadevirus	NA	Acadevirus PM93	Proteus phage PM 93			CG	dsDNA
GCA_001041495.1_ViralProj287986	Duplodnaviria	Heunggongvirae	Uroviricota	Caudoviricetes		Straboviridae	Tevenvirinae	Moonvirus	NA	Moonvirus moon	Citrobacter phage Moon			CG	dsDNA
GCA_001041515.1_ViralProj287990	Duplodnaviria	Heunggongvirae	Uroviricota	Caudoviricetes		Autographiviridae	Krylovirinae	Phikmvvirus	NA	Phikmvvirus ABTNL	Pseudomonas phage vB_PaeP_PPA-ABTNL			CG	dsDNA
GCA_001041555.1_ViralProj287998	Duplodnaviria	Heunggongvirae	Uroviricota	Caudoviricetes		Herelleviridae	Bastillevirinae	Caeruleovirus	NA	Caeruleovirus BCP82	Bacillus phage BCP8-2			CG	dsDNA
GCA_001041695.1_ViralProj288026	Duplodnaviria	Heunggongvirae	Uroviricota	Caudoviricetes				Muvirus	NA	Muvirus SfMu	Shigella phage SfMu			CG	dsDNA
GCA_001041755.1_ViralProj287963	Duplodnaviria	Heunggongvirae	Uroviricota	Caudoviricetes				Alcyoneusvirus	NA	Alcyoneusvirus K641	Klebsiella phage K64-1			CG	dsDNA
GCA_001041775.1_ViralProj287967	Duplodnaviria	Heunggongvirae	Uroviricota	Caudoviricetes		Straboviridae	Tevenvirinae	Gelderlandvirus	NA	Gelderlandvirus stml198	Salmonella phage STML-198			CG	dsDNA
GCA_001041815.1_ViralProj287979	Duplodnaviria	Heunggongvirae	Uroviricota	Caudoviricetes		Autographiviridae	Molineuxvirinae	Acadevirus	NA	Acadevirus PM85	Proteus phage PM 85			CG	dsDNA
GCA_001041855.1_ViralProj287987	Duplodnaviria	Heunggongvirae	Uroviricota	Caudoviricetes			Mccleskeyvirinae	Unaquatrovirus	NA	Unaquatrovirus Ln9	Leuconostoc phage Ln-9			CG	dsDNA
GCA_001041895.1_ViralProj287995	Duplodnaviria	Heunggongvirae	Uroviricota	Caudoviricetes		Autographiviridae	Slopekvirinae	Novosibovirus	NA	Novosibovirus PM16	Proteus phage PM16			CG	dsDNA
GCA_001042055.1_ViralProj287951	Duplodnaviria	Heunggongvirae	Uroviricota	Caudoviricetes		Straboviridae	Tevenvirinae	Tequatrovirus	NA	Tequatrovirus deeone	Yersinia phage phiD1			CG	dsDNA
GCA_001042135.1_ViralProj287971	Duplodnaviria	Heunggongvirae	Uroviricota	Caudoviricetes		Demerecviridae	Markadamsvirinae	Tequintavirus	NA	Tequintavirus DT57C	Escherichia phage DT57C			CG	dsDNA
GCA_001042175.1_ViralProj287980	Duplodnaviria	Heunggongvirae	Uroviricota	Caudoviricetes		Autographiviridae	Slopekvirinae	Novosibovirus	NA	Novosibovirus PM75	Proteus phage PM 75			CG	dsDNA
GCA_001042195.1_ViralProj287984	Duplodnaviria	Heunggongvirae	Uroviricota	Caudoviricetes		Schitoviridae	Humphriesvirinae	Pollockvirus	NA	Escherichia virus Pollock	Escherichia phage Pollock			CG	dsDNA
GCA_001042275.1_ViralProj288000	Duplodnaviria	Heunggongvirae	Uroviricota	Caudoviricetes				Seoulvirus	NA	Seoulvirus SPN3US	Salmonella phage SPN3US			CG	dsDNA
GCA_001190715.1_ViralProj291269	Duplodnaviria	Heunggongvirae	Uroviricota	Caudoviricetes				Pahexavirus	NA	Propionibacterium virus Attacne	Propionibacterium phage Attacne			CG	dsDNA
GCA_001308395.1_ViralProj298065	Duplodnaviria	Heunggongvirae	Uroviricota	Caudoviricetes				Anamdongvirus	NA	Anamdongvirus LBR48	Lactobacillus phage LBR48			CG	dsDNA
GCA_001308515.1_ViralProj298061	Duplodnaviria	Heunggongvirae	Uroviricota	Caudoviricetes				Vhmlvirus	NA	Vhmlvirus VP585	Vibrio phage VP585			CG	dsDNA
GCA_001308535.1_ViralProj298066	Duplodnaviria	Heunggongvirae	Uroviricota	Caudoviricetes			Guernseyvirinae	Kagunavirus	NA	Kagunavirus K1H	Escherichia phage K1H			CG	dsDNA
GCA_001308555.1_ViralProj298070	Duplodnaviria	Heunggongvirae	Uroviricota	Caudoviricetes			Eucampyvirinae	Firehammervirus	NA	Firehammervirus CPt10	Campylobacter phage CPt10			CG	dsDNA
GCA_001308795.2_ViralProj298062	Duplodnaviria	Heunggongvirae	Uroviricota	Caudoviricetes		Zobellviridae		Citrovirus	NA	Citrobacter virus CVT22	Citrobacter phage CVT22			CG	dsDNA
GCA_001308815.1_ViralProj298067	Duplodnaviria	Heunggongvirae	Uroviricota	Caudoviricetes			Guernseyvirinae	Kagunavirus	NA	Kagunavirus K1G	Escherichia phage K1G			CG	dsDNA
GCA_001308835.1_ViralProj298071	Duplodnaviria	Heunggongvirae	Uroviricota	Caudoviricetes			Eucampyvirinae	Firehammervirus	NA	Firehammervirus CP220	Campylobacter phage CP220			CG	dsDNA
GCA_001310115.1_ViralProj298081	Duplodnaviria	Heunggongvirae	Uroviricota	Caudoviricetes		Straboviridae	Tevenvirinae	Tequatrovirus	NA	Tequatrovirus ar1	Escherichia phage AR1			CG	dsDNA
GCA_001447065.1_ViralProj302553	Duplodnaviria	Heunggongvirae	Uroviricota	Caudoviricetes			Sepvirinae	Oslovirus	NA	Oslovirus PA2	Escherichia phage PA2			CG	dsDNA
GCA_001470115.1_ViralProj306290	Duplodnaviria	Heunggongvirae	Uroviricota	Caudoviricetes			Bclasvirinae	Pegunavirus	NA	Pegunavirus apizium	Mycobacterium phage Apizium			CG	dsDNA
GCA_001470135.1_ViralProj306294	Duplodnaviria	Heunggongvirae	Uroviricota	Caudoviricetes				Brunovirus	NA	Brunovirus SEN34	Salmonella phage SEN34			CG	dsDNA
GCA_001470195.1_ViralProj306342	Duplodnaviria	Heunggongvirae	Uroviricota	Caudoviricetes		Autographiviridae	Slopekvirinae	Drulisvirus	NA	Drulisvirus Kp2	Klebsiella phage Kp2			CG	dsDNA
GCA_001470235.1_ViralProj306350	Duplodnaviria	Heunggongvirae	Uroviricota	Caudoviricetes		Autographiviridae	Beijerinckvirinae	Friunavirus	NA	Friunavirus AB1	Acinetobacter phage phiAB1			CG	dsDNA
GCA_001470275.1_ViralProj306365	Duplodnaviria	Heunggongvirae	Uroviricota	Caudoviricetes			Guernseyvirinae	Jerseyvirus	NA	Jerseyvirus f18SE	Salmonella phage f18SE			CG	dsDNA
GCA_001470355.1_ViralProj306288	Duplodnaviria	Heunggongvirae	Uroviricota	Caudoviricetes				Decurrovirus	NA	Decurrovirus decurro	Arthrobacter phage Decurro			CG	dsDNA
GCA_001470375.1_ViralProj306292	Duplodnaviria	Heunggongvirae	Uroviricota	Caudoviricetes				Dexdertvirus	NA	Dexdertvirus GTE6	Gordonia phage GTE6			CG	dsDNA
GCA_001470395.1_ViralProj306296	Duplodnaviria	Heunggongvirae	Uroviricota	Caudoviricetes				Getseptimavirus	NA	Getseptimavirus GMA7	Gordonia phage GMA7			CG	dsDNA
GCA_001470455.1_ViralProj306344	Duplodnaviria	Heunggongvirae	Uroviricota	Caudoviricetes				Phleivirus	NA	Phleivirus Phlei	Mycobacterium phage Phlei			CG	dsDNA
GCA_001470475.1_ViralProj306348	Duplodnaviria	Heunggongvirae	Uroviricota	Caudoviricetes		Straboviridae	Tevenvirinae	Kanagawavirus	NA	Kanagawavirus pei20	Edwardsiella phage PEi20			CG	dsDNA
GCA_001470555.1_ViralProj306275	Duplodnaviria	Heunggongvirae	Uroviricota	Caudoviricetes			Sepvirinae	Oslovirus	NA	Oslovirus ov191	Escherichia phage phi191			CG	dsDNA
GCA_001470655.1_ViralProj306289	Duplodnaviria	Heunggongvirae	Uroviricota	Caudoviricetes		Straboviridae	Tevenvirinae	Jiaodavirus	NA	Jiaodavirus jd18	Klebsiella phage JD18			CG	dsDNA
GCA_001470695.1_ViralProj306297	Duplodnaviria	Heunggongvirae	Uroviricota	Caudoviricetes				Gamtrevirus	NA	Gamtrevirus GMA3	Gordonia phage GMA3			CG	dsDNA
GCA_001470735.1_ViralProj306341	Duplodnaviria	Heunggongvirae	Uroviricota	Caudoviricetes		Autographiviridae	Studiervirinae	Apdecimavirus	NA	Apdecimavirus AP10	Yersinia phage vB_YenP_AP10			CG	dsDNA
GCA_001470795.1_ViralProj306353	Duplodnaviria	Heunggongvirae	Uroviricota	Caudoviricetes		Autographiviridae	Studiervirinae	Ghunavirus	NA	Ghunavirus PPPL1	Pseudomonas phage PPPL-1			CG	dsDNA
GCA_001470815.1_ViralProj306364	Duplodnaviria	Heunggongvirae	Uroviricota	Caudoviricetes			Vequintavirinae	Mydovirus	NA	Mydovirus KB57	Klebsiella phage vB_KpnM_KB57			CG	dsDNA
GCA_001470895.1_ViralProj306291	Duplodnaviria	Heunggongvirae	Uroviricota	Caudoviricetes		Zierdtviridae	Petrovskivirinae	Foxborovirus	NA	Foxborovirus GTE8	Gordonia phage GTE8			CG	dsDNA
GCA_001470935.1_ViralProj306299	Duplodnaviria	Heunggongvirae	Uroviricota	Caudoviricetes		Kyanoviridae		Libanvirus	NA	Libanvirus ptim40	Cyanophage P-TIM40			CG	dsDNA
GCA_001470995.1_ViralProj306347	Duplodnaviria	Heunggongvirae	Uroviricota	Caudoviricetes		Autographiviridae		Piedvirus	NA	Piedvirus IMEDE1	Delftia phage IME-DE1			CG	dsDNA
GCA_001482955.1_ViralProj306892	Duplodnaviria	Heunggongvirae	Uroviricota	Caudoviricetes			Bclasvirinae	Acadianvirus	NA	Acadianvirus baee	Mycobacterium phage Baee			CG	dsDNA
GCA_001500515.1_ViralProj307734	Duplodnaviria	Heunggongvirae	Uroviricota	Caudoviricetes		Drexlerviridae		Webervirus	NA	Webervirus KLPN1	Klebsiella phage KLPN1			CG	dsDNA
GCA_001500595.1_ViralProj307750	Duplodnaviria	Heunggongvirae	Uroviricota	Caudoviricetes				Tinduovirus	NA	Tsukamurella virus TIN2	Tsukamurella phage TIN2			CG	dsDNA
GCA_001500615.1_ViralProj307754	Duplodnaviria	Heunggongvirae	Uroviricota	Caudoviricetes		Straboviridae		Bragavirus	NA	Bragavirus pm5461	Proteus phage vB_PmiM_Pm5461			CG	dsDNA
GCA_001500635.1_ViralProj307758	Duplodnaviria	Heunggongvirae	Uroviricota	Caudoviricetes				Woodruffvirus	NA	Streptomyces virus YDN12	Streptomyces phage YDN12			CG	dsDNA
GCA_001500675.1_ViralProj307766	Duplodnaviria	Heunggongvirae	Uroviricota	Caudoviricetes				Cecivirus	NA	Cecivirus cv250	Bacillus phage 250			CG	dsDNA
GCA_001500715.1_ViralProj307774	Duplodnaviria	Heunggongvirae	Uroviricota	Caudoviricetes		Peduoviridae		Eganvirus	NA	Eganvirus ev186	Escherichia phage 186			CG	dsDNA
GCA_001500855.2_ViralProj307802	Duplodnaviria	Heunggongvirae	Uroviricota	Caudoviricetes			Ounavirinae	Suspvirus	NA	Suspvirus SUSP1	Escherichia phage phiSUSP1			CG	dsDNA
GCA_001500875.1_ViralProj307806	Duplodnaviria	Heunggongvirae	Uroviricota	Caudoviricetes				Chiangmaivirus	NA	Chiangmaivirus RSF1	Ralstonia phage RSF1			CG	dsDNA
GCA_001500935.1_ViralProj307818	Duplodnaviria	Heunggongvirae	Uroviricota	Caudoviricetes		Autographiviridae	Studiervirinae	Przondovirus	NA	Przondovirus K5	Klebsiella phage K5			CG	dsDNA
GCA_001500995.1_ViralProj307055	Duplodnaviria	Heunggongvirae	Uroviricota	Caudoviricetes				Pbunavirus	NA	Pbunavirus DL60	Pseudomonas phage DL60			CG	dsDNA
GCA_001501155.1_ViralProj307731	Duplodnaviria	Heunggongvirae	Uroviricota	Caudoviricetes		Peduoviridae		Peduovirus	NA	Peduovirus pro147	Escherichia phage pro147			CG	dsDNA
GCA_001501175.1_ViralProj307735	Duplodnaviria	Heunggongvirae	Uroviricota	Caudoviricetes				Emdodecavirus	NA	Emdodecavirus N3	Sinorhizobium phage phiN3			CG	dsDNA
GCA_001501215.1_ViralProj307743	Duplodnaviria	Heunggongvirae	Uroviricota	Caudoviricetes			Gclasvirinae	Avocadovirus	NA	Avocadovirus cambiare	Mycobacterium phage Cambiare			CG	dsDNA
GCA_001501235.1_ViralProj307747	Duplodnaviria	Heunggongvirae	Uroviricota	Caudoviricetes				Luchadorvirus	NA	Lucadorvirus luchador	Mycobacterium phage Luchador			CG	dsDNA
GCA_001501275.1_ViralProj307755	Duplodnaviria	Heunggongvirae	Uroviricota	Caudoviricetes		Autographiviridae	Molineuxvirinae	Acadevirus	NA	Acadevirus Pm5460	Proteus phage vB_PmiP_Pm5460			CG	dsDNA
GCA_001501535.1_ViralProj307807	Duplodnaviria	Heunggongvirae	Uroviricota	Caudoviricetes		Schitoviridae	Migulavirinae	Luzseptimavirus	NA	Luzseptimavirus KPP21	Pseudomonas phage KPP21			CG	dsDNA
GCA_001501555.1_ViralProj307811	Duplodnaviria	Heunggongvirae	Uroviricota	Caudoviricetes		Autographiviridae	Melnykvirinae	Aghbyvirus	NA	Aghbyvirus ISAO8	Yersinia phage vB_YenP_ISAO8			CG	dsDNA
GCA_001501635.1_ViralProj307827	Duplodnaviria	Heunggongvirae	Uroviricota	Caudoviricetes		Straboviridae		Schizotequatrovirus	NA	Schizotequatrovirus valkk3	Vibrio phage ValKK3			CG	dsDNA
GCA_001501655.1_ViralProj307831	Duplodnaviria	Heunggongvirae	Uroviricota	Caudoviricetes			Queuovirinae	Seuratvirus	NA	Seuratvirus cajan	Escherichia phage CAjan			CG	dsDNA
GCA_001501675.1_ViralProj307835	Duplodnaviria	Heunggongvirae	Uroviricota	Caudoviricetes		Herelleviridae	Twortvirinae	Sepunavirus	NA	Sepunavirus IPLAC1C	Staphylococcus phage vB_SepM_ phiIPLA-C1C			CG	dsDNA
GCA_001501695.1_ViralProj307843	Duplodnaviria	Heunggongvirae	Uroviricota	Caudoviricetes				Lubbockvirus	NA	Lubbockvirus CDHM19	Clostridium phage phiCDHM19			CG	dsDNA
GCA_001501775.1_ViralProj307065	Duplodnaviria	Heunggongvirae	Uroviricota	Caudoviricetes			Gochnauervirinae	Harrisonvirus	NA	Harrisonvirus harrison	Paenibacillus phage Harrison			CG	dsDNA
GCA_001501795.1_ViralProj307686	Duplodnaviria	Heunggongvirae	Uroviricota	Caudoviricetes				Waukeshavirus	NA	Bacillus virus BMBtp3	Bacillus phage vB_BtS_BMBtp3			CG	dsDNA
GCA_001501895.1_ViralProj307724	Duplodnaviria	Heunggongvirae	Uroviricota	Caudoviricetes			Arquatrovirinae	Camvirus	NA	Camvirus amela	Streptomyces phage Amela			CG	dsDNA
GCA_001501935.1_ViralProj307732	Duplodnaviria	Heunggongvirae	Uroviricota	Caudoviricetes		Peduoviridae		Senquatrovirus	NA	Senquatrovirus SEN4	Salmonella phage SEN4			CG	dsDNA
GCA_001501995.1_ViralProj307744	Duplodnaviria	Heunggongvirae	Uroviricota	Caudoviricetes			Gclasvirinae	Avocadovirus	NA	Avocadovirus flagstaff	Mycobacterium phage FlagStaff			CG	dsDNA
GCA_001502015.1_ViralProj307748	Duplodnaviria	Heunggongvirae	Uroviricota	Caudoviricetes		Herelleviridae	Brockvirinae	Kochikohdavirus	NA	Kochikohdavirus EFLK1	Enterococcus phage EFLK1			CG	dsDNA
GCA_001502035.1_ViralProj307752	Duplodnaviria	Heunggongvirae	Uroviricota	Caudoviricetes			Gochnauervirinae	Vegasvirus	NA	Vegasvirus vegas	Paenibacillus phage Vegas			CG	dsDNA
GCA_001502055.1_ViralProj307756	Duplodnaviria	Heunggongvirae	Uroviricota	Caudoviricetes			Ounavirinae	Felixounavirus	NA	Felixounavirus AYO145A	Escherichia phage vB_EcoM_AYO145A			CG	dsDNA
GCA_001502415.1_ViralProj307687	Duplodnaviria	Heunggongvirae	Uroviricota	Caudoviricetes			Pclasvirinae	Fishburnevirus	NA	Fishburnevirus brusacoram	Mycobacterium phage Brusacoram			CG	dsDNA
GCA_001502475.1_ViralProj307717	Duplodnaviria	Heunggongvirae	Uroviricota	Caudoviricetes			Arquatrovirinae	Likavirus	NA	Likavirus caliburn	Streptomyces phage Caliburn			CG	dsDNA
GCA_001502555.1_ViralProj307733	Duplodnaviria	Heunggongvirae	Uroviricota	Caudoviricetes		Peduoviridae		Eganvirus	NA	Eganvirus SEN1	Salmonella phage SEN1			CG	dsDNA
GCA_001502595.1_ViralProj307741	Duplodnaviria	Heunggongvirae	Uroviricota	Caudoviricetes			Gclasvirinae	Pinnievirus	NA	Pinnievirus moorethemaryer	Mycobacterium phage MOOREtheMARYer			CG	dsDNA
GCA_001502615.1_ViralProj307745	Duplodnaviria	Heunggongvirae	Uroviricota	Caudoviricetes			Pclasvirinae	Phayoncevirus	NA	Phayoncevirus phayonce	Mycobacterium phage Phayonce			CG	dsDNA
GCA_001502635.1_ViralProj307749	Duplodnaviria	Heunggongvirae	Uroviricota	Caudoviricetes				Tinduovirus	NA	Tsukamurella virus TIN3	Tsukamurella phage TIN3			CG	dsDNA
GCA_001502675.1_ViralProj307757	Duplodnaviria	Heunggongvirae	Uroviricota	Caudoviricetes				Woodruffvirus	NA	Streptomyces virus TP1604	Streptomyces phage TP1604			CG	dsDNA
GCA_001502895.2_ViralProj307801	Duplodnaviria	Heunggongvirae	Uroviricota	Caudoviricetes			Ounavirinae	Suspvirus	NA	Suspvirus SUSP2	Escherichia phage phiSUSP2			CG	dsDNA
GCA_001502955.1_ViralProj307813	Duplodnaviria	Heunggongvirae	Uroviricota	Caudoviricetes		Straboviridae		Pseudotevenvirus	NA	Pseudotevenvirus imecf2	Citrobacter phage IME-CF2			CG	dsDNA
GCA_001502995.1_ViralProj307821	Duplodnaviria	Heunggongvirae	Uroviricota	Caudoviricetes		Autographiviridae	Krylovirinae	Phikmvvirus	NA	Phikmvvirus DL62	Pseudomonas phage DL62			CG	dsDNA
GCA_001503035.1_ViralProj307829	Duplodnaviria	Heunggongvirae	Uroviricota	Caudoviricetes			Queuovirinae	Nonagvirus	NA	Nonagvirus JenP1	Enterobacteria phage JenP1			CG	dsDNA
GCA_001503055.1_ViralProj307833	Duplodnaviria	Heunggongvirae	Uroviricota	Caudoviricetes				Chiangmaivirus	NA	Chiangmaivirus RSL2	Ralstonia phage RSL2			CG	dsDNA
GCA_001503075.1_ViralProj307841	Duplodnaviria	Heunggongvirae	Uroviricota	Caudoviricetes		Kyanoviridae		Haifavirus	NA	Haifavirus tim68	Prochlorococcus phage P-TIM68			CG	dsDNA
GCA_001503215.1_ViralProj307871	Duplodnaviria	Heunggongvirae	Uroviricota	Caudoviricetes		Straboviridae		Tulanevirus	NA	Tuaanevirus ime13	Stenotrophomonas phage IME13			CG	dsDNA
GCA_001503235.1_ViralProj307875	Duplodnaviria	Heunggongvirae	Uroviricota	Caudoviricetes		Autographiviridae		Aegirvirus	NA	Aegirvirus SCBP42	Synechococcus phage S-CBP42			CG	dsDNA
GCA_001503255.1_ViralProj307879	Duplodnaviria	Heunggongvirae	Uroviricota	Caudoviricetes				Colunavirus	NA	Colunavirus CL2	Lactobacillus phage CL2			CG	dsDNA
GCA_001503275.1_ViralProj307883	Duplodnaviria	Heunggongvirae	Uroviricota	Caudoviricetes			Weiservirinae	Timquatrovirus	NA	Timquatrovirus mufasa	Mycobacterium phage Mufasa			CG	dsDNA
GCA_001503455.1_ViralProj307919	Duplodnaviria	Heunggongvirae	Uroviricota	Caudoviricetes				Pagevirus	NA	Pagevirus palmer	Bacillus phage Palmer			CG	dsDNA
GCA_001503475.1_ViralProj307923	Duplodnaviria	Heunggongvirae	Uroviricota	Caudoviricetes				Lilyvirus	NA	Paenibacillus virus Lily	Bacteriophage Lily			CG	dsDNA
GCA_001503495.1_ViralProj307927	Duplodnaviria	Heunggongvirae	Uroviricota	Caudoviricetes				Steinhofvirus	NA	Achromobacter virus JWX	Achromobacter phage JWX			CG	dsDNA
GCA_001503515.1_ViralProj307931	Duplodnaviria	Heunggongvirae	Uroviricota	Caudoviricetes				Bruynoghevirus	NA	Bruynoghevirus CHU	Pseudomonas phage PhiCHU			CG	dsDNA
GCA_001503535.1_ViralProj307935	Duplodnaviria	Heunggongvirae	Uroviricota	Caudoviricetes		Straboviridae	Tevenvirinae	Mosugukvirus	NA	Mosugukvirus pm2	Pectobacterium bacteriophage PM2			CG	dsDNA
GCA_001503615.1_ViralProj307951	Duplodnaviria	Heunggongvirae	Uroviricota	Caudoviricetes		Mesyanzhinovviridae	Bradleyvirinae	Abidjanvirus	NA	Pseudomonas virus PaMx11	Pseudomonas phage PaMx11			CG	dsDNA
GCA_001503695.1_ViralProj307967	Duplodnaviria	Heunggongvirae	Uroviricota	Caudoviricetes		Straboviridae	Tevenvirinae	Gaprivervirus	NA	Gaprivervirus vr20	Escherichia phage vB_EcoM_VR20			CG	dsDNA
GCA_001503755.1_ViralProj308009	Duplodnaviria	Heunggongvirae	Uroviricota	Caudoviricetes				Leicestervirus	NA	Clostridioides virus phiCD146	Clostridium phage phiCD146			CG	dsDNA
GCA_001503775.1_ViralProj308013	Duplodnaviria	Heunggongvirae	Uroviricota	Caudoviricetes				Yongloolinvirus	NA	Yongloolinvirus MMP01	Clostridium phage phiMMP01			CG	dsDNA
GCA_001503795.1_ViralProj308017	Duplodnaviria	Heunggongvirae	Uroviricota	Caudoviricetes		Autographiviridae	Studiervirinae	Eapunavirus	NA	Eapunavirus Eap1	Enterobacter phage phiEap-1			CG	dsDNA
GCA_001503835.1_ViralProj307830	Duplodnaviria	Heunggongvirae	Uroviricota	Caudoviricetes			Queuovirinae	Nonagvirus	NA	Nonagvirus JenK1	Enterobacteria phage JenK1			CG	dsDNA
GCA_001503875.1_ViralProj307842	Duplodnaviria	Heunggongvirae	Uroviricota	Caudoviricetes		Autographiviridae	Okabevirinae	Risjevirus	NA	Risjevirus RSJ5	Ralstonia phage RSJ5			CG	dsDNA
GCA_001503995.1_ViralProj307866	Duplodnaviria	Heunggongvirae	Uroviricota	Caudoviricetes		Autographiviridae	Okabevirinae	Risjevirus	NA	Risjevirus RSJ2	Ralstonia phage RSJ2			CG	dsDNA
GCA_001504055.1_ViralProj307878	Duplodnaviria	Heunggongvirae	Uroviricota	Caudoviricetes				Iaduovirus	NA	Iaduovirus iA2	Lactobacillus phage iA2			CG	dsDNA
GCA_001504155.1_ViralProj307898	Duplodnaviria	Heunggongvirae	Uroviricota	Caudoviricetes		Vilmaviridae	Lclasvirinae	Lumosvirus	NA	Lumosvirus lolly9	Mycobacterium phage Lolly9			CG	dsDNA
GCA_001504215.1_ViralProj307910	Duplodnaviria	Heunggongvirae	Uroviricota	Caudoviricetes				Jenstvirus	NA	Jenstvirus jenst	Brevibacillus phage Jenst			CG	dsDNA
GCA_001504235.1_ViralProj307914	Duplodnaviria	Heunggongvirae	Uroviricota	Caudoviricetes		Herelleviridae	Bastillevirinae	Tsarbombavirus	NA	Tsarbombavirus tsarbomba	Bacillus phage TsarBomba			CG	dsDNA
GCA_001504255.1_ViralProj307918	Duplodnaviria	Heunggongvirae	Uroviricota	Caudoviricetes		Herelleviridae	Brockvirinae	Schiekvirus	NA	Schiekvirus EFDG1	Enterococcus phage EFDG1			CG	dsDNA
GCA_001504295.1_ViralProj307926	Duplodnaviria	Heunggongvirae	Uroviricota	Caudoviricetes				Steinhofvirus	NA	Achromobacter virus 83-24	Achromobacter phage 83-24			CG	dsDNA
GCA_001504315.1_ViralProj307930	Duplodnaviria	Heunggongvirae	Uroviricota	Caudoviricetes				Sheenvirus	NA	Sheenvirus Sheen	Mycobacterium phage Sheen			CG	dsDNA
GCA_001504395.1_ViralProj307946	Duplodnaviria	Heunggongvirae	Uroviricota	Caudoviricetes		Herelleviridae	Spounavirinae	Siminovitchvirus	NA	Siminovitchvirus JL	Bacillus phage JL			CG	dsDNA
GCA_001504415.1_ViralProj307950	Duplodnaviria	Heunggongvirae	Uroviricota	Caudoviricetes				Pamexvirus	NA	Pseudomonas virus PaMx28	Pseudomonas phage PaMx28			CG	dsDNA
GCA_001504495.1_ViralProj307966	Duplodnaviria	Heunggongvirae	Uroviricota	Caudoviricetes		Straboviridae	Tevenvirinae	Gaprivervirus	NA	Gaprivervirus vr25	Escherichia phage vB_EcoM_VR25			CG	dsDNA
GCA_001504535.1_ViralProj308008	Duplodnaviria	Heunggongvirae	Uroviricota	Caudoviricetes				Leicestervirus	NA	Clostridioides virus phiCD111	Clostridium phage phiCD111			CG	dsDNA
GCA_001504555.1_ViralProj308012	Duplodnaviria	Heunggongvirae	Uroviricota	Caudoviricetes				Sherbrookevirus	NA	Sherbrookevirus CD506	Clostridium phage phiCD506			CG	dsDNA
GCA_001504635.1_ViralProj307828	Duplodnaviria	Heunggongvirae	Uroviricota	Caudoviricetes			Queuovirinae	Nonagvirus	NA	Nonagvirus JenP2	Enterobacteria phage JenP2			CG	dsDNA
GCA_001504695.1_ViralProj307844	Duplodnaviria	Heunggongvirae	Uroviricota	Caudoviricetes			Bronfenbrennervirinae	Biseptimavirus	NA	Biseptimavirus bv23MRA	Staphylococcus phage 23MRA			CG	dsDNA
GCA_001504815.1_ViralProj307868	Duplodnaviria	Heunggongvirae	Uroviricota	Caudoviricetes				Sherbrookevirus	NA	Sherbrookevirus CDHM11	Clostridium phage phiCDHM11			CG	dsDNA
GCA_001504855.1_ViralProj307876	Duplodnaviria	Heunggongvirae	Uroviricota	Caudoviricetes				Colunavirus	NA	Colunavirus iLp1308	Lactobacillus phage iLp1308			CG	dsDNA
GCA_001504875.1_ViralProj307880	Duplodnaviria	Heunggongvirae	Uroviricota	Caudoviricetes				Colunavirus	NA	Colunavirus CL1	Lactobacillus phage CL1			CG	dsDNA
GCA_001504895.1_ViralProj307884	Duplodnaviria	Heunggongvirae	Uroviricota	Caudoviricetes		Vilmaviridae	Lclasvirinae	Faithunavirus	NA	Faithunavirus archie	Mycobacterium phage Archie			CG	dsDNA
GCA_001505015.1_ViralProj307908	Duplodnaviria	Heunggongvirae	Uroviricota	Caudoviricetes			Bclasvirinae	Coopervirus	NA	Coopervirus brownCNA	Mycobacterium phage BrownCNA			CG	dsDNA
GCA_001505055.1_ViralProj307916	Duplodnaviria	Heunggongvirae	Uroviricota	Caudoviricetes			Weiservirinae	Kratiovirus	NA	Kratiovirus kratio	Mycobacterium phage Kratio			CG	dsDNA
GCA_001505095.1_ViralProj307924	Duplodnaviria	Heunggongvirae	Uroviricota	Caudoviricetes				Fernvirus	NA	Fernvirus diva	Paenibacillus phage Diva			CG	dsDNA
GCA_001505115.1_ViralProj307928	Duplodnaviria	Heunggongvirae	Uroviricota	Caudoviricetes		Demerecviridae	Ermolyevavirinae	Jesfedecavirus	NA	Jesfedecavirus phi3	Vibrio phage phi 3			CG	dsDNA
GCA_001505135.1_ViralProj307932	Duplodnaviria	Heunggongvirae	Uroviricota	Caudoviricetes		Straboviridae	Tevenvirinae	Tegunavirus	NA	Tegunavirus yenmtg1	Yersinia phage vB_YenM_TG1			CG	dsDNA
GCA_001505175.1_ViralProj307940	Duplodnaviria	Heunggongvirae	Uroviricota	Caudoviricetes				Fukuivirus	NA	Fukuivirus MVDC	Microcystis phage MaMV-DC			CG	dsDNA
GCA_001505195.1_ViralProj307944	Duplodnaviria	Heunggongvirae	Uroviricota	Caudoviricetes				Abouovirus	NA	Abouovirus abouo	Brevibacillus phage Abouo			CG	dsDNA
GCA_001505215.1_ViralProj307948	Duplodnaviria	Heunggongvirae	Uroviricota	Caudoviricetes				Pamexvirus	NA	Pseudomonas virus PaMx74	Pseudomonas phage PaMx74			CG	dsDNA
GCA_001505235.1_ViralProj307952	Duplodnaviria	Heunggongvirae	Uroviricota	Caudoviricetes				Skunavirus	NA	Lactococcus virus ASCC191	Lactococcus phage ASCC191			CG	dsDNA
GCA_001505295.1_ViralProj307964	Duplodnaviria	Heunggongvirae	Uroviricota	Caudoviricetes		Casjensviridae		Lavrentievavirus	NA	Lavrentieva pPM01	Proteus phage pPM_01			CG	dsDNA
GCA_001505375.1_ViralProj308010	Duplodnaviria	Heunggongvirae	Uroviricota	Caudoviricetes				Sherbrookevirus	NA	Sherbrookevirus CD4811	Clostridium phage phiCD481-1			CG	dsDNA
GCA_001505515.1_ViralProj307877	Duplodnaviria	Heunggongvirae	Uroviricota	Caudoviricetes				Pleetrevirus	NA	Lactobacillus virus iLp84	Lactobacillus phage iLp84			CG	dsDNA
GCA_001505535.1_ViralProj307881	Duplodnaviria	Heunggongvirae	Uroviricota	Caudoviricetes		Salasmaviridae		Mingyongvirus	NA	Mingyongvirus VMY22	Bacillus phage VMY22			CG	dsDNA
GCA_001505635.1_ViralProj307901	Duplodnaviria	Heunggongvirae	Uroviricota	Caudoviricetes		Herelleviridae	Bastillevirinae	Bequatrovirus	NA	Bequatrovirus avesobmore	Bacillus phage AvesoBmore			CG	dsDNA
GCA_001505675.1_ViralProj307909	Duplodnaviria	Heunggongvirae	Uroviricota	Caudoviricetes				Jimmervirus	NA	Jimmervirus osiris	Brevibacillus phage Osiris			CG	dsDNA
GCA_001505755.1_ViralProj307925	Duplodnaviria	Heunggongvirae	Uroviricota	Caudoviricetes				Fernvirus	NA	Fernvirus Hb10c2	Paenibacillus phage HB10c2			CG	dsDNA
GCA_001505775.1_ViralProj307929	Duplodnaviria	Heunggongvirae	Uroviricota	Caudoviricetes		Schitoviridae		Pacinivirus	NA	Pacinivirus phi1	Vibrio phage phi 1			CG	dsDNA
GCA_001505855.1_ViralProj307945	Duplodnaviria	Heunggongvirae	Uroviricota	Caudoviricetes		Herelleviridae	Spounavirinae	Siminovitchvirus	NA	Siminovitchvirus shanette	Bacillus phage Shanette			CG	dsDNA
GCA_001505915.1_ViralProj307957	Duplodnaviria	Heunggongvirae	Uroviricota	Caudoviricetes			Ceeclamvirinae	Bixzunavirus	NA	Bixzunavirus alice	Mycobacterium phage Alice			CG	dsDNA
GCA_001506015.1_ViralProj308011	Duplodnaviria	Heunggongvirae	Uroviricota	Caudoviricetes				Colneyvirus	NA	Colneyvirus CD505	Clostridium phage phiCD505			CG	dsDNA
GCA_001506035.1_ViralProj308015	Duplodnaviria	Heunggongvirae	Uroviricota	Caudoviricetes		Autographiviridae	Studiervirinae	Teetrevirus	NA	Teetrevirus CFP1	Citrobacter phage phiCFP-1			CG	dsDNA
GCA_001507515.1_ViralProj253205	Duplodnaviria	Heunggongvirae	Uroviricota	Caudoviricetes		Autographiviridae		Lauvirus	NA	Lauvirus lau218	Podovirus Lau218		strain Abe	CG	dsDNA
GCA_001550485.1_ViralProj310894	Duplodnaviria	Heunggongvirae	Uroviricota	Caudoviricetes		Autographiviridae	Melnykvirinae	Cronosvirus	NA	Cronosvirus DevCD23823	Cronobacter phage Dev-CD-23823			CG	dsDNA
GCA_001550525.1_ViralProj310902	Duplodnaviria	Heunggongvirae	Uroviricota	Caudoviricetes		Autographiviridae	Studiervirinae	Teetrevirus	NA	Teetrevirus E2	Enterobacter phage E-2			CG	dsDNA
GCA_001550685.1_ViralProj310934	Duplodnaviria	Heunggongvirae	Uroviricota	Caudoviricetes				Gordtnkvirus	NA	Gordtnkvirus gordtnk2	Gordonia phage GordTnk2			CG	dsDNA
GCA_001550825.1_ViralProj310887	Duplodnaviria	Heunggongvirae	Uroviricota	Caudoviricetes		Drexlerviridae		Webervirus	NA	Webervirus KP36	Klebsiella phage KP36			CG	dsDNA
GCA_001550865.1_ViralProj310895	Duplodnaviria	Heunggongvirae	Uroviricota	Caudoviricetes				Chertseyvirus	NA	Chertseyvirus GE1	Lactococcus phage GE1			CG	dsDNA
GCA_001551025.1_ViralProj310927	Duplodnaviria	Heunggongvirae	Uroviricota	Caudoviricetes				Titanvirus	NA	Rhodobacter virus RcTitan	Rhodobacter phage RcTitan			CG	dsDNA
GCA_001551085.1_ViralProj310939	Duplodnaviria	Heunggongvirae	Uroviricota	Caudoviricetes		Herelleviridae		Hopescreekvirus	NA	Hopescreekvirus LfeInf	Lactobacillus phage LfeInf			CG	dsDNA
GCA_001551125.1_ViralProj310951	Duplodnaviria	Heunggongvirae	Uroviricota	Caudoviricetes		Casjensviridae		Fengtaivirus	NA	Fengtaivirus Axp2	Achromobacter phage phiAxp-2			CG	dsDNA
GCA_001551225.1_ViralProj310901	Duplodnaviria	Heunggongvirae	Uroviricota	Caudoviricetes		Autographiviridae	Corkvirinae	Phimunavirus	NA	Phimunavirus peat1	Pectobacterium phage Peat1			CG	dsDNA
GCA_001551465.1_ViralProj310953	Duplodnaviria	Heunggongvirae	Uroviricota	Caudoviricetes				Otagovirus	NA	Otagovirus VCM	Pseudomonas phage VCM			CG	dsDNA
GCA_001551565.1_ViralProj310900	Duplodnaviria	Heunggongvirae	Uroviricota	Caudoviricetes				Shandongvirus	NA	Shandongvirus H101	Pseudoalteromonas phage H101			CG	dsDNA
GCA_001551625.1_ViralProj310912	Duplodnaviria	Heunggongvirae	Uroviricota	Caudoviricetes			Sepvirinae	Diegovirus	NA	Diegovirus dv7502Stx	Shigella phage 75/02 Stx			CG	dsDNA
GCA_001551725.1_ViralProj310936	Duplodnaviria	Heunggongvirae	Uroviricota	Caudoviricetes				Fernvirus	NA	Fernvirus rani	Paenibacillus phage Rani			CG	dsDNA
GCA_001551765.1_ViralProj310944	Duplodnaviria	Heunggongvirae	Uroviricota	Caudoviricetes		Herelleviridae	Bastillevirinae	Agatevirus	NA	Agatevirus Bp8pC	Bacillus phage Bp8p-C			CG	dsDNA
GCA_001698275.1_ViralProj336042	Duplodnaviria	Heunggongvirae	Uroviricota	Caudoviricetes				Soupsvirus	NA	Gordonia virus Soups	Gordonia phage Soups			CG	dsDNA
GCA_001698335.1_ViralProj336043	Duplodnaviria	Heunggongvirae	Uroviricota	Caudoviricetes				Smoothievirus	NA	Gordonia virus Smoothie	Gordonia phage Smoothie			CG	dsDNA
GCA_001736295.1_ViralProj343506	Duplodnaviria	Heunggongvirae	Uroviricota	Caudoviricetes				Oneupvirus	NA	Gordonia virus OneUp	Gordonia phage OneUp			CG	dsDNA
GCA_001736315.1_ViralProj343510	Duplodnaviria	Heunggongvirae	Uroviricota	Caudoviricetes				Demosthenesvirus	NA	Demosthenesvirus demosthenes	Gordonia phage Demosthenes			CG	dsDNA
GCA_001736335.1_ViralProj343514	Duplodnaviria	Heunggongvirae	Uroviricota	Caudoviricetes				Bowservirus	NA	Bowservirus bowser	Gordonia phage Bowser			CG	dsDNA
GCA_001736355.1_ViralProj343518	Duplodnaviria	Heunggongvirae	Uroviricota	Caudoviricetes				Flaumdravirus	NA	Flaumdravirus KIL4	Pseudomonas phage vB_PsyM_KIL1			CG	dsDNA
GCA_001736455.1_ViralProj343538	Duplodnaviria	Heunggongvirae	Uroviricota	Caudoviricetes			Ruthgordonvirinae	Vendettavirus	NA	Vendettavirus vendetta	Gordonia phage Vendetta			CG	dsDNA
GCA_001736495.1_ViralProj343490	Duplodnaviria	Heunggongvirae	Uroviricota	Caudoviricetes		Peduoviridae		Phitrevirus	NA	Phitrevirus phi3	Pseudomonas phage phi3			CG	dsDNA
GCA_001736515.1_ViralProj343505	Duplodnaviria	Heunggongvirae	Uroviricota	Caudoviricetes				Orchidvirus	NA	Gordonia virus Orchid	Gordonia phage Orchid			CG	dsDNA
GCA_001736555.1_ViralProj343513	Duplodnaviria	Heunggongvirae	Uroviricota	Caudoviricetes				Britbratvirus	NA	Britbratvirus britbrat	Gordonia phage BritBrat			CG	dsDNA
GCA_001736655.1_ViralProj343533	Duplodnaviria	Heunggongvirae	Uroviricota	Caudoviricetes			Ruthgordonvirinae	Gesputvirus	NA	Gesputvirus gsput1	Gordonia phage Gsput1			CG	dsDNA
GCA_001736675.1_ViralProj343537	Duplodnaviria	Heunggongvirae	Uroviricota	Caudoviricetes				Wizardvirus	NA	Gordonia virus Wizard	Gordonia phage Wizard			CG	dsDNA
GCA_001736775.1_ViralProj343512	Duplodnaviria	Heunggongvirae	Uroviricota	Caudoviricetes				Smoothievirus	NA	Gordonia virus ClubL	Gordonia phage ClubL			CG	dsDNA
GCA_001736795.1_ViralProj343516	Duplodnaviria	Heunggongvirae	Uroviricota	Caudoviricetes				Smoothievirus	NA	Gordonia virus Bachita	Gordonia phage Bachita			CG	dsDNA
GCA_001736815.1_ViralProj343520	Duplodnaviria	Heunggongvirae	Uroviricota	Caudoviricetes		Autographiviridae	Corkvirinae	Kantovirus	NA	Kantovirus C171	Pseudomonas phage YMC11/06/C171_PPU_BP			CG	dsDNA
GCA_001736835.1_ViralProj343524	Duplodnaviria	Heunggongvirae	Uroviricota	Caudoviricetes		Herelleviridae	Bastillevirinae	Eldridgevirus	NA	Eldridgevirus eldridge	Bacillus phage Eldridge			CG	dsDNA
GCA_001736875.1_ViralProj343532	Duplodnaviria	Heunggongvirae	Uroviricota	Caudoviricetes				Bendigovirus	NA	Bendigovirus GMA6	Gordonia phage GMA6			CG	dsDNA
GCA_001736895.1_ViralProj343536	Duplodnaviria	Heunggongvirae	Uroviricota	Caudoviricetes				Woesvirus	NA	Gordonia virus Woes	Gordonia phage Woes			CG	dsDNA
GCA_001736935.1_ViralProj343488	Duplodnaviria	Heunggongvirae	Uroviricota	Caudoviricetes		Herelleviridae	Bastillevirinae	Shalavirus	NA	Shalavirus Shbh1	Bacillus phage Shbh1			CG	dsDNA
GCA_001736955.2_ASM173695v2	Duplodnaviria	Heunggongvirae	Uroviricota	Caudoviricetes		Herelleviridae	Bastillevirinae	Nitunavirus	NA	Nitunavirus SPG24	Bacillus phage SPG24			CG	dsDNA
GCA_001736975.1_ViralProj343507	Duplodnaviria	Heunggongvirae	Uroviricota	Caudoviricetes				Montyvirus	NA	Gordonia virus Monty	Gordonia phage Monty			CG	dsDNA
GCA_001736995.1_ViralProj343511	Duplodnaviria	Heunggongvirae	Uroviricota	Caudoviricetes				Emalynvirus	NA	Emalynvirus cozz	Gordonia phage Cozz			CG	dsDNA
GCA_001737115.1_ViralProj343535	Duplodnaviria	Heunggongvirae	Uroviricota	Caudoviricetes		Herelleviridae	Twortvirinae	Silviavirus	NA	Silviavirus stau2	Staphylococcus phage Stau2			CG	dsDNA
GCA_001743595.1_ViralProj344093	Duplodnaviria	Heunggongvirae	Uroviricota	Caudoviricetes				Hedwigvirus	NA	Hedwigvirus hedwig	Gordonia phage Hedwig			CG	dsDNA
GCA_001743675.2_ViralProj344109	Duplodnaviria	Heunggongvirae	Uroviricota	Caudoviricetes		Salasmaviridae	Northropvirinae	Claudivirus	NA	Claudivirus aurora	Bacillus phage Aurora			CG	dsDNA
GCA_001743795.1_ViralProj344134	Duplodnaviria	Heunggongvirae	Uroviricota	Caudoviricetes		Straboviridae	Tevenvirinae	Jiaodavirus	NA	Jiaodavirus pko111	Klebsiella phage PKO111			CG	dsDNA
GCA_001743975.2_ViralProj344178	Duplodnaviria	Heunggongvirae	Uroviricota	Caudoviricetes		Autographiviridae	Corkvirinae	Kotilavirus	NA	Kotilavirus PP16	Pectobacterium phage PP16			CG	dsDNA
GCA_001744135.1_ViralProj344212	Duplodnaviria	Heunggongvirae	Uroviricota	Caudoviricetes				Wizardvirus	NA	Gordonia virus Twister6	Gordonia phage Twister6			CG	dsDNA
GCA_001744215.1_ViralProj344312	Duplodnaviria	Heunggongvirae	Uroviricota	Caudoviricetes				Punavirus	NA	Punavirus SJ46	Salmonella phage SJ46			CG	dsDNA
GCA_001744255.1_ViralProj344090	Duplodnaviria	Heunggongvirae	Uroviricota	Caudoviricetes				Nyceiraevirus	NA	Gordonia virus Nyceirae	Gordonia phage Nyceirae			CG	dsDNA
GCA_001744275.1_ViralProj344094	Duplodnaviria	Heunggongvirae	Uroviricota	Caudoviricetes				Ghobesvirus	NA	Ghobesvirus ghobes	Gordonia phage Ghobes			CG	dsDNA
GCA_001744335.2_ViralProj344106	Duplodnaviria	Heunggongvirae	Uroviricota	Caudoviricetes				Erskinevirus	NA	Erskinevirus asesino	Erwinia phage vB_EamM_Asesino			CG	dsDNA
GCA_001744575.1_ViralProj344161	Duplodnaviria	Heunggongvirae	Uroviricota	Caudoviricetes		Straboviridae		Gaultarvirus	NA	Gaultarvirus mp1	Morganella phage vB_MmoM_MP1			CG	dsDNA
GCA_001744595.1_ViralProj344166	Duplodnaviria	Heunggongvirae	Uroviricota	Caudoviricetes		Drexlerviridae		Vilniusvirus	NA	Vilniusvirus NBD2	Escherichia phage vB_EcoS_NBD2			CG	dsDNA
GCA_001744655.1_ViralProj344179	Duplodnaviria	Heunggongvirae	Uroviricota	Caudoviricetes		Autographiviridae		Bifseptvirus	NA	Bifseptvirus andromeda	Pseudomonas phage Andromeda			CG	dsDNA
GCA_001744715.1_ViralProj344191	Duplodnaviria	Heunggongvirae	Uroviricota	Caudoviricetes			Queuovirinae	Nipunavirus	NA	Nipunavirus NP1	Pseudomonas phage NP1			CG	dsDNA
GCA_001744735.1_ViralProj344195	Duplodnaviria	Heunggongvirae	Uroviricota	Caudoviricetes		Drexlerviridae	Tempevirinae	Tlsvirus	NA	Tlsvirus phSE2	Salmonella phage phSE-2			CG	dsDNA
GCA_001744795.1_ViralProj344209	Duplodnaviria	Heunggongvirae	Uroviricota	Caudoviricetes			Weiservirinae	Kratiovirus	NA	Kratiovirus gengar	Mycobacterium phage Gengar			CG	dsDNA
GCA_001744815.1_ViralProj344213	Duplodnaviria	Heunggongvirae	Uroviricota	Caudoviricetes				Terapinvirus	NA	Gordonia virus Terapin	Gordonia phage Terapin			CG	dsDNA
GCA_001744895.1_ViralProj344088	Duplodnaviria	Heunggongvirae	Uroviricota	Caudoviricetes				Pleetrevirus	NA	Lactobacillus virus PLE3	Lactobacillus phage PLE3			CG	dsDNA
GCA_001744995.2_ViralProj344108	Duplodnaviria	Heunggongvirae	Uroviricota	Caudoviricetes		Salasmaviridae	Northropvirinae	Claudivirus	NA	Claudivirus claudi	Bacillus phage Claudi			CG	dsDNA
GCA_001745015.1_ViralProj344112	Duplodnaviria	Heunggongvirae	Uroviricota	Caudoviricetes			Ounavirinae	Felixounavirus	NA	Felixounavirus Alf5	Escherichia phage vB_EcoM_Alf5			CG	dsDNA
GCA_001745035.1_ViralProj344116	Duplodnaviria	Heunggongvirae	Uroviricota	Caudoviricetes		Rountreeviridae	Rakietenvirinae	Rosenblumvirus	NA	Rosenblumvirus BP39	Staphylococcus phage BP39			CG	dsDNA
GCA_001745255.1_ViralProj344168	Duplodnaviria	Heunggongvirae	Uroviricota	Caudoviricetes				Pulverervirus	NA	Propionibacterium virus PFR1	Propionibacterium phage PFR1			CG	dsDNA
GCA_001745555.1_ViralProj344087	Duplodnaviria	Heunggongvirae	Uroviricota	Caudoviricetes				Pleeduovirus	NA	Lactobacillus virus PLE2	Lactobacillus phage PLE2			CG	dsDNA
GCA_001745575.1_ViralProj344091	Duplodnaviria	Heunggongvirae	Uroviricota	Caudoviricetes				Gorjumvirus	NA	Gorjumvirus jumbo	Gordonia phage Jumbo			CG	dsDNA
GCA_001745615.1_ViralProj344099	Duplodnaviria	Heunggongvirae	Uroviricota	Caudoviricetes				Bantamvirus	NA	Bantamvirus bantam	Gordonia phage Bantam			CG	dsDNA
GCA_001745895.1_ViralProj344162	Duplodnaviria	Heunggongvirae	Uroviricota	Caudoviricetes		Autographiviridae	Studiervirinae	Minipunavirus	NA	Minipunavirus MP2	Morganella phage vB_MmoP_MP2			CG	dsDNA
GCA_001754165.1_ViralProj344584	Duplodnaviria	Heunggongvirae	Uroviricota	Caudoviricetes		Kyanoviridae		Bristolvirus	NA	Bristolvirus rhodeisland	Cyanophage S-RIM32			CG	dsDNA
GCA_001754245.1_ViralProj344601	Duplodnaviria	Heunggongvirae	Uroviricota	Caudoviricetes		Kyanoviridae		Neptunevirus	NA	Neptunevirus srim50	Cyanophage S-RIM50		RW_29_0704	CG	dsDNA
GCA_001754305.1_ViralProj344613	Duplodnaviria	Heunggongvirae	Uroviricota	Caudoviricetes				Yvonnevirus	NA	Gordonia virus Yvonnetastic	Gordonia phage Yvonnetastic			CG	dsDNA
GCA_001754365.1_ViralProj344625	Duplodnaviria	Heunggongvirae	Uroviricota	Caudoviricetes				Betterkatzvirus	NA	Betterkatzvirus betterkatz	Gordonia phage BetterKatz			CG	dsDNA
GCA_001754405.1_ViralProj344633	Duplodnaviria	Heunggongvirae	Uroviricota	Caudoviricetes				Bippervirus	NA	Bippervirus bipper	Mycobacterium phage Bipper			CG	dsDNA
GCA_001754425.1_ViralProj344637	Duplodnaviria	Heunggongvirae	Uroviricota	Caudoviricetes				Marthavirus	NA	Marthavirus barretlemon	Arthrobacter phage BarretLemon			CG	dsDNA
GCA_001754685.1_ViralProj344602	Duplodnaviria	Heunggongvirae	Uroviricota	Caudoviricetes				Thornevirus	NA	Thornevirus SP15	Bacillus phage SP-15			CG	dsDNA
GCA_001754725.1_ViralProj344610	Duplodnaviria	Heunggongvirae	Uroviricota	Caudoviricetes		Autographiviridae	Molineuxvirinae	Zindervirus	NA	Zindervirus BP12B	Salmonella phage BP12B			CG	dsDNA
GCA_001754765.2_ViralProj344618	Duplodnaviria	Heunggongvirae	Uroviricota	Caudoviricetes				Schnabeltiervirus	NA	Gordonia virus Schnabeltier	Gordonia phage Schnabeltier			CG	dsDNA
GCA_001755125.1_ViralProj344604	Duplodnaviria	Heunggongvirae	Uroviricota	Caudoviricetes				Pukovnikvirus	NA	Pukovnikvirus bactobuster	Mycobacterium phage Bactobuster			CG	dsDNA
GCA_001755145.1_ViralProj344608	Duplodnaviria	Heunggongvirae	Uroviricota	Caudoviricetes				Rosemountvirus	NA	Rosemountvirus BP63	Salmonella phage BP63			CG	dsDNA
GCA_001755205.1_ViralProj344620	Duplodnaviria	Heunggongvirae	Uroviricota	Caudoviricetes				Luckytenvirus	NA	Gordonia virus Lucky10	Gordonia phage Lucky10			CG	dsDNA
GCA_001755225.1_ViralProj344624	Duplodnaviria	Heunggongvirae	Uroviricota	Caudoviricetes				Emalynvirus	NA	Emalynvirus emalyn	Gordonia phage Emalyn			CG	dsDNA
GCA_001755285.1_ViralProj344636	Duplodnaviria	Heunggongvirae	Uroviricota	Caudoviricetes				Kelleziovirus	NA	Kelleziovirus kellezzio	Arthrobacter phage KellEzio			CG	dsDNA
GCA_001755305.1_ViralProj344640	Duplodnaviria	Heunggongvirae	Uroviricota	Caudoviricetes				Rockefellervirus	NA	Staphylococcus virus CNPx	Staphylococcus phage CNPx			CG	dsDNA
GCA_001755605.1_ViralProj344615	Duplodnaviria	Heunggongvirae	Uroviricota	Caudoviricetes				Vividuovirus	NA	Gordonia virus Vivi2	Gordonia phage Vivi2			CG	dsDNA
GCA_001755705.1_ViralProj344635	Duplodnaviria	Heunggongvirae	Uroviricota	Caudoviricetes				Kelleziovirus	NA	Kelleziovirus kitkat	Arthrobacter phage Kitkat			CG	dsDNA
GCA_001881715.1_ViralProj353705	Duplodnaviria	Heunggongvirae	Uroviricota	Caudoviricetes		Duneviridae		Unahavirus	NA	Unahavirus uv2A	Flavobacterium phage 2A			CG	dsDNA
GCA_001881875.1_ViralProj353714	Duplodnaviria	Heunggongvirae	Uroviricota	Caudoviricetes				Saltrevirus	NA	Saltrevirus sv64795sal3	Salmonella phage 64795_sal3			CG	dsDNA
GCA_001881955.1_ViralProj353680	Duplodnaviria	Heunggongvirae	Uroviricota	Caudoviricetes		Kyanoviridae		Kanaloavirus	NA	Kanaloavirus scam9	Synechococcus phage S-CAM9		1109NB16	CG	dsDNA
GCA_001881995.1_ViralProj353712	Duplodnaviria	Heunggongvirae	Uroviricota	Caudoviricetes			Ounavirinae	Felixounavirus	NA	Felixounavirus BPS15Q2	Salmonella phage BPS15Q2			CG	dsDNA
GCA_001882035.1_ViralProj353681	Duplodnaviria	Heunggongvirae	Uroviricota	Caudoviricetes		Kyanoviridae		Mazuvirus	NA	Mazuvirus scam7	Synechococcus phage S-CAM7 isolate 0910CC49			CG	dsDNA
GCA_001882075.1_ViralProj353710	Duplodnaviria	Heunggongvirae	Uroviricota	Caudoviricetes		Demerecviridae	Markadamsvirinae	Epseptimavirus	NA	Epseptimavirus 118970sal2	Salmonella phage 118970_sal2			CG	dsDNA
GCA_001882115.1_ViralProj353686	Duplodnaviria	Heunggongvirae	Uroviricota	Caudoviricetes		Kyanoviridae		Cymopoleiavirus	NA	Cymopoleiavirus swam2	Synechococcus phage S-WAM2		0810PA29	CG	dsDNA
GCA_001882155.1_ViralProj353682	Duplodnaviria	Heunggongvirae	Uroviricota	Caudoviricetes		Kyanoviridae		Charybdisvirus	NA	Charybdisvirus scam3	Synechococcus phage S-CAM3			CG	dsDNA
GCA_001882275.1_ViralProj353704	Duplodnaviria	Heunggongvirae	Uroviricota	Caudoviricetes				Fipvunavirus	NA	Fipvunavirus Fpv1	Flavobacterium phage Fpv1			CG	dsDNA
GCA_001882315.1_ViralProj353670	Duplodnaviria	Heunggongvirae	Uroviricota	Caudoviricetes				Shuimuvirus	NA	Shuimuvirus IME207	Salmonella phage IME207			CG	dsDNA
GCA_001884535.1_ViralProj353700	Duplodnaviria	Heunggongvirae	Uroviricota	Caudoviricetes				Galunavirus	NA	Galunavirus GAL1	Gordonia phage GAL1			CG	dsDNA
GCA_001884555.1_ViralProj353706	Duplodnaviria	Heunggongvirae	Uroviricota	Caudoviricetes		Duneviridae		Unahavirus	NA	Unahavirus uv1H	Flavobacterium phage 1H			CG	dsDNA
GCA_001885345.1_ViralProj353687	Duplodnaviria	Heunggongvirae	Uroviricota	Caudoviricetes		Kyanoviridae		Sokavirus	NA	Sokavirus swam1	Synechococcus phage S-WAM1			CG	dsDNA
GCA_001885505.1_ViralProj344311	Duplodnaviria	Heunggongvirae	Uroviricota	Caudoviricetes		Ackermannviridae	Cvivirinae	Kuttervirus	NA	Kuttervirus GG32	Salmonella phage GG32			CG	dsDNA
GCA_002037815.1_ViralProj287956	Duplodnaviria	Heunggongvirae	Uroviricota	Caudoviricetes		Schitoviridae		Dendoorenvirus	NA	Dendoorenvirus RG2014	Delftia phage RG-2014			CG	dsDNA
GCA_002149205.1_ViralProj266637.3	Duplodnaviria	Heunggongvirae	Uroviricota	Caudoviricetes			Queuovirinae	Seuratvirus	NA	Seuratvirus seurat	Escherichia phage Seurat			CG	dsDNA
GCA_002149225.1_ViralProj266637.7	Duplodnaviria	Heunggongvirae	Uroviricota	Caudoviricetes				Pagevirus	NA	Pagevirus pascal	Bacillus phage Pascal			CG	dsDNA
GCA_002149285.1_ViralProj266637.11	Duplodnaviria	Heunggongvirae	Uroviricota	Caudoviricetes		Straboviridae	Tevenvirinae	Moonvirus	NA	Moonvirus merlin	Citrobacter phage Merlin			CG	dsDNA
GCA_002149325.1_ViralProj266637.5	Duplodnaviria	Heunggongvirae	Uroviricota	Caudoviricetes		Herelleviridae	Bastillevirinae	Matervirus	NA	Matervirus mater	Bacillus phage Mater			CG	dsDNA
GCA_002149345.1_ViralProj266637.9	Duplodnaviria	Heunggongvirae	Uroviricota	Caudoviricetes				Slashvirus	NA	Bacillus virus Stahl	Bacillus phage Stahl			CG	dsDNA
GCA_002149385.1_ViralProj266637.14	Duplodnaviria	Heunggongvirae	Uroviricota	Caudoviricetes		Autographiviridae		Percyvirus	NA	Percyvirus percy	Caulobacter phage Percy			CG	dsDNA
GCA_002149405.1_ViralProj266637.4	Duplodnaviria	Heunggongvirae	Uroviricota	Caudoviricetes		Demerecviridae	Markadamsvirinae	Epseptimavirus	NA	Epseptimavirus stitch	Salmonella phage Stitch			CG	dsDNA
GCA_002149545.1_ViralProj308018.2	Duplodnaviria	Heunggongvirae	Uroviricota	Caudoviricetes				Rockvillevirus	NA	Bacillus virus phi4J1	Bacillus phage phi4J1			CG	dsDNA
GCA_002149585.1_ViralProj266637.2	Duplodnaviria	Heunggongvirae	Uroviricota	Caudoviricetes			Ounavirinae	Mooglevirus	NA	Mooglevirus moogle	Citrobacter phage Moogle			CG	dsDNA
GCA_002149605.1_ViralProj266637.6	Duplodnaviria	Heunggongvirae	Uroviricota	Caudoviricetes		Herelleviridae	Bastillevirinae	Moonbeamvirus	NA	Moonbeamvirus moonbeam	Bacillus phage Moonbeam			CG
GCA_002149725.1_ViralProj298084.1	Duplodnaviria	Heunggongvirae	Uroviricota	Caudoviricetes				Beetrevirus	NA	Beetrevirus JD18	Pseudomonas phage JD18			Partial genome	dsDNA
GCA_002211055.1_ViralProj308019	Duplodnaviria	Heunggongvirae	Uroviricota	Caudoviricetes		Schitoviridae	Rothmandenesvirinae	Dongdastvirus	NA	Dongdastvirus Axp3	Achromobacter phage phiAxp-3			CG	dsDNA
GCA_002211075.1_ViralProj344159	Duplodnaviria	Heunggongvirae	Uroviricota	Caudoviricetes		Schitoviridae	Erskinevirinae	Johnsonvirus	NA	Johnsonvirus Ea92	Erwinia phage vB_EamP_Frozen			CG	dsDNA
GCA_002221805.1_ViralProj14310	Duplodnaviria	Heunggongvirae	Uroviricota	Caudoviricetes			Sepvirinae	Traversvirus	NA	Traversvirus II	Escherichia phage Stx2 II			CG	dsDNA
GCA_002366065.1_ViralProj353501	Duplodnaviria	Heunggongvirae	Uroviricota	Caudoviricetes		Kyanoviridae		Potamoivirus	NA	Potamoivirus cam4	Synechococcus phage S-CAM4			CG	dsDNA
GCA_002534655.1_ASM253465v1	Duplodnaviria	Heunggongvirae	Uroviricota	Caudoviricetes		Kyanoviridae		Lowelvirus	NA	Lowelvirus tuscon4d	Synechococcus phage ACG-2014d			CG	dsDNA
GCA_002578345.1_ASM257834v1	Duplodnaviria	Heunggongvirae	Uroviricota	Caudoviricetes		Autographiviridae		Oinezvirus	NA	Oinezvirus S37C6	uncultured phage_MedDCM-OCT-S37-C6			CG	dsDNA
GCA_002578465.1_ASM257846v1	Duplodnaviria	Heunggongvirae	Uroviricota	Caudoviricetes		Autographiviridae		Sieqvirus	NA	Sieqvirus S42C7	uncultured phage_MedDCM-OCT-S42-C7			CG	dsDNA
GCA_002578525.1_ASM257852v1	Duplodnaviria	Heunggongvirae	Uroviricota	Caudoviricetes		Autographiviridae		Pelagivirus	NA	Pelagivirus S35C6	uncultured phage_MedDCM-OCT-S35-C6			CG	dsDNA
GCA_002578555.1_ASM257855v1	Duplodnaviria	Heunggongvirae	Uroviricota	Caudoviricetes		Autographiviridae		Fussvirus	NA	Fussvirus S30C28	uncultured phage_MedDCM-OCT-S30-C28			CG	dsDNA
GCA_002578605.1_ASM257860v1	Duplodnaviria	Heunggongvirae	Uroviricota	Caudoviricetes		Autographiviridae		Ayaqvirus	NA	Ayaqvirus S45C18	uncultured phage_MedDCM-OCT-S45-C18			CG	dsDNA
GCA_002578645.1_ASM257864v1	Duplodnaviria	Heunggongvirae	Uroviricota	Caudoviricetes		Autographiviridae		Foussvirus	NA	Foussvirus S46C10	uncultured phage MedDCM-OCT-S46-C10			CG	dsDNA
GCA_002578675.1_ASM257867v1	Duplodnaviria	Heunggongvirae	Uroviricota	Caudoviricetes		Autographiviridae		Nohivirus	NA	Nohivirus S31C1	uncultured phage_MedDCM-OCT-S31-C1			CG	dsDNA
GCA_002578725.1_ASM257872v1	Duplodnaviria	Heunggongvirae	Uroviricota	Caudoviricetes		Autographiviridae		Stopalavirus	NA	Stopalavirus S38C3	uncultured phage_MedDCM-OCT-S38-C3			CG	dsDNA
GCA_002578785.1_ASM257878v1	Duplodnaviria	Heunggongvirae	Uroviricota	Caudoviricetes		Autographiviridae		Krakvirus	NA	Krakvirus S39C11	uncultured phage_MedDCM-OCT-S39-C11			CG	dsDNA
GCA_002582805.1_ASM258280v1	Duplodnaviria	Heunggongvirae	Uroviricota	Caudoviricetes		Autographiviridae		Ashivirus	NA	Ashivirus S45C4	uncultured phage_MedDCM-OCT-S45-C4			CG	dsDNA
GCA_002582845.1_ASM258284v1	Duplodnaviria	Heunggongvirae	Uroviricota	Caudoviricetes		Autographiviridae		Pedosvirus	NA	Pedosvirus S28C3	uncultured phage_MedDCM-OCT-S28-C3			CG	dsDNA
GCA_002582885.1_ASM258288v1	Duplodnaviria	Heunggongvirae	Uroviricota	Caudoviricetes		Autographiviridae		Votkovvirus	NA	Votkovvirus S28C10	uncultured phage_MedDCM-OCT-S28-C10			CG	dsDNA
GCA_002593825.1_ASM259382v1	Duplodnaviria	Heunggongvirae	Uroviricota	Caudoviricetes		Kyanoviridae		Atlauavirus	NA	Atlauavirus acg2014f	Synechococcus phage ACG-2014f_Syn7803C7			CG	dsDNA
GCA_002593865.1_ASM259386v1	Duplodnaviria	Heunggongvirae	Uroviricota	Caudoviricetes		Kyanoviridae		Atlauavirus	NA	Atlauavirus tusconc8	Synechococcus phage ACG-2014f_Syn7803C8			CG	dsDNA
GCA_002593965.1_ASM259396v1	Duplodnaviria	Heunggongvirae	Uroviricota	Caudoviricetes		Kyanoviridae		Atlauavirus	NA	Atlauavirus caeruleum	Synechococcus phage ACG-2014f_Syn7803US26			CG	dsDNA
GCA_002594645.1_ASM259464v1	Duplodnaviria	Heunggongvirae	Uroviricota	Caudoviricetes				Pankowvirus	NA	Enterobacteria virus 2851	Enterobacteria phage 2851			CG	dsDNA
GCA_002596125.1_ASM259612v1	Duplodnaviria	Heunggongvirae	Uroviricota	Caudoviricetes		Kyanoviridae		Brizovirus	NA	Brizovirus rhodeisland01	Cyanophage S-RIM12 isolate RW_01_0310			CG	dsDNA
GCA_002596185.1_ASM259618v1	Duplodnaviria	Heunggongvirae	Uroviricota	Caudoviricetes		Kyanoviridae		Brizovirus	NA	Brizovirus rhodeisland06	Cyanophage S-RIM12 isolate RW_06_0310			CG	dsDNA
GCA_002596865.1_ASM259686v1	Duplodnaviria	Heunggongvirae	Uroviricota	Caudoviricetes		Kyanoviridae		Nereusvirus	NA	Nereusvirus tusconc61	Synechococcus phage ACG-2014b		Syn7803C61	CG	dsDNA
GCA_002597145.1_ASM259714v1	Duplodnaviria	Heunggongvirae	Uroviricota	Caudoviricetes		Kyanoviridae		Nereusvirus	NA	Nereusvirus tusconc4	Synechococcus phage ACG-2014b		Syn9311C4	CG	dsDNA
GCA_002598325.1_ASM259832v1	Duplodnaviria	Heunggongvirae	Uroviricota	Caudoviricetes		Kyanoviridae		Neptunevirus	NA	Neptunevirus srim18	Synechococcus phage S-RIM8		RW_22_0300	CG	dsDNA
GCA_002599225.1_ASM259922v1	Duplodnaviria	Heunggongvirae	Uroviricota	Caudoviricetes		Kyanoviridae		Vellamovirus	NA	Vellamovirus rhodeisland44	Cyanophage S-RIM44		Np_42_0711	CG	dsDNA
GCA_002600145.1_ASM260014v1	Varidnaviria	Bamfordvirae	Preplasmiviricota	Tectiliviricetes	Kalamavirales	Tectiviridae		Alphatectivirus	NA	Pseudomonas virus PR4	Enterobacteria phage PR4			CG	dsDNA
GCA_002600715.1_ASM260071v1	Duplodnaviria	Heunggongvirae	Uroviricota	Caudoviricetes				Veracruzvirus	NA	Veracruzvirus heldan	Mycobacterium phage HelDan			CG	dsDNA
GCA_002600755.1_ASM260075v1	Duplodnaviria	Heunggongvirae	Uroviricota	Caudoviricetes				Ficleduovirus	NA	Ficleduovirus FCV1	Flavobacterium phage FCV-1			CG	dsDNA
GCA_002600775.1_ASM260077v1	Duplodnaviria	Heunggongvirae	Uroviricota	Caudoviricetes				Omegavirus	NA	Mycobacterium virus Baka	Mycobacterium phage Baka			CG	dsDNA
GCA_002600795.2_ASM260079v2	Duplodnaviria	Heunggongvirae	Uroviricota	Caudoviricetes				Kostyavirus	NA	Mycobacterium virus Bask21	Mycobacterium phage Bask21			CG	dsDNA
GCA_002600855.1_ASM260085v1	Duplodnaviria	Heunggongvirae	Uroviricota	Caudoviricetes				Gladiatorvirus	NA	Gladiatorvirus hammer	Mycobacterium phage Hammer			CG	dsDNA
GCA_002600985.1_ASM260098v1	Duplodnaviria	Heunggongvirae	Uroviricota	Caudoviricetes				Omegavirus	NA	Mycobacterium virus Littlee	Mycobacterium phage LittleE			CG	dsDNA
GCA_002601185.1_ASM260118v1	Duplodnaviria	Heunggongvirae	Uroviricota	Caudoviricetes				Gladiatorvirus	NA	Gladiatorvirus ericB	Mycobacterium phage EricB			CG	dsDNA
GCA_002601205.1_ASM260120v1	Duplodnaviria	Heunggongvirae	Uroviricota	Caudoviricetes				Benedictvirus	NA	Benedictvirus benedict	Mycobacterium phage Benedict			CG	dsDNA
GCA_002601325.1_ASM260132v1	Duplodnaviria	Heunggongvirae	Uroviricota	Caudoviricetes				Takahashivirus	NA	Takahashivirus PBS1	Bacillus phage PBS1			CG	dsDNA
GCA_002601405.1_ASM260140v1	Duplodnaviria	Heunggongvirae	Uroviricota	Caudoviricetes				Benedictvirus	NA	Benedictvirus cuco	Mycobacterium phage Cuco			CG	dsDNA
GCA_002601425.1_ASM260142v1	Duplodnaviria	Heunggongvirae	Uroviricota	Caudoviricetes			Arquatrovirinae	Arequatrovirus	NA	Arequatrovirus ELB20	Streptomyces phage phiELB20			CG	dsDNA
GCA_002601545.1_ASM260154v1	Duplodnaviria	Heunggongvirae	Uroviricota	Caudoviricetes		Salasmaviridae	Picovirinae	Beecentumtrevirus	NA	Beecentumtrevirus Goe1	Bacillus phage vB_BsuP-Goe1			CG	dsDNA
GCA_002601785.1_ASM260178v1	Duplodnaviria	Heunggongvirae	Uroviricota	Caudoviricetes				Backyardiganvirus	NA	Backyardiganvirus LHTSCC	Mycobacterium phage LHTSCC			CG	dsDNA
GCA_002601905.1_ASM260190v1	Duplodnaviria	Heunggongvirae	Uroviricota	Caudoviricetes				Casadabanvirus	NA	Casadabanvirus FHA0480	Pseudomonas phage F_HA0480sp/Pa1651			CG	dsDNA
GCA_002602105.1_ASM260210v1	Duplodnaviria	Heunggongvirae	Uroviricota	Caudoviricetes		Autographiviridae	Slopekvirinae	Koutsourovirus	NA	Koutsourovirus KDA1	Enterobacter phage phiKDA1			CG	dsDNA
GCA_002602145.1_ASM260214v1	Duplodnaviria	Heunggongvirae	Uroviricota	Caudoviricetes		Autographiviridae	Colwellvirinae	Kaohsiungvirus	NA	Kaohsiungvirus AS51	Vibrio phage AS51			CG	dsDNA
GCA_002602185.1_ASM260218v1	Duplodnaviria	Heunggongvirae	Uroviricota	Caudoviricetes				Skunavirus	NA	Lactococcus virus ASCC273	Lactococcus phage ASCC273			CG	dsDNA
GCA_002602405.1_ASM260240v1	Duplodnaviria	Heunggongvirae	Uroviricota	Caudoviricetes			Weiservirinae	Keshuvirus	NA	Keshuvirus macncheese	Mycobacterium virus MacnCheese			CG	dsDNA
GCA_002602465.1_ASM260246v1	Duplodnaviria	Heunggongvirae	Uroviricota	Caudoviricetes				Backyardiganvirus	NA	Backyardiganvirus arturo	Mycobacterium phage Arturo			CG	dsDNA
GCA_002602565.1_ASM260256v1	Duplodnaviria	Heunggongvirae	Uroviricota	Caudoviricetes		Autographiviridae	Corkvirinae	Phimunavirus	NA	Phimunavirus fM1	Pectobacterium phage ?M1			CG	dsDNA
GCA_002602585.1_ASM260258v1	Duplodnaviria	Heunggongvirae	Uroviricota	Caudoviricetes		Autographiviridae		Paadamvirus	NA	Paadamvirus RHEph01	Rhizobium phage RHEph01			CG	dsDNA
GCA_002602605.1_ASM260260v1	Duplodnaviria	Heunggongvirae	Uroviricota	Caudoviricetes			Tybeckvirinae	Douglaswolinvirus	NA	Douglaswolinvirus B2	Lactobacillus phage ATCC 8014-B2			CG	dsDNA
GCA_002602825.1_ASM260282v1	Duplodnaviria	Heunggongvirae	Uroviricota	Caudoviricetes				Sawaravirus	NA	Escherichia virus WGPS2	Stx2-converting phage Stx2a_WGPS2			CG	dsDNA
GCA_002602965.1_ASM260296v1	Duplodnaviria	Heunggongvirae	Uroviricota	Caudoviricetes			Arquatrovirinae	Camvirus	NA	Camvirus CAM	Streptomyces phage phiCAM			CG	dsDNA
GCA_002602985.1_ASM260298v1	Duplodnaviria	Heunggongvirae	Uroviricota	Caudoviricetes				Obolenskvirus	NA	Obolenskvirus AB2	Acinetobacter phage vB_AbaM-IME-AB2			CG	dsDNA
GCA_002603045.1_ASM260304v1	Duplodnaviria	Heunggongvirae	Uroviricota	Caudoviricetes				Hollowayvirus	NA	Hollowayvirus H66	Pseudomonas phage H66			CG	dsDNA
GCA_002603165.1_ASM260316v1	Duplodnaviria	Heunggongvirae	Uroviricota	Caudoviricetes		Schitoviridae		Pacinivirus	NA	Pacinivirus VCO139	Vibrio phage VCO139			CG	dsDNA
GCA_002603305.1_ASM260330v1	Duplodnaviria	Heunggongvirae	Uroviricota	Caudoviricetes		Autographiviridae		Tawavirus	NA	Tawavirus JSF7	Vibrio phage JSF7			CG	dsDNA
GCA_002603385.1_ASM260338v1	Duplodnaviria	Heunggongvirae	Uroviricota	Caudoviricetes		Duneviridae		Unahavirus	NA	Unahavirus uv23T	Flavobacterium phage 23T			CG	dsDNA
GCA_002603425.1_ASM260342v1	Duplodnaviria	Heunggongvirae	Uroviricota	Caudoviricetes			Arquatrovirinae	Likavirus	NA	Likavirus danzina	Streptomyces phage Danzina			CG	dsDNA
GCA_002603885.1_ASM260388v1	Duplodnaviria	Heunggongvirae	Uroviricota	Caudoviricetes		Zobellviridae		Melvirus	NA	Pseudoalteromonas virus HP1	Pseudoalteromonas phage HP1			CG	dsDNA
GCA_002604045.1_ASM260404v1	Duplodnaviria	Heunggongvirae	Uroviricota	Caudoviricetes			Bclasvirinae	Acadianvirus	NA	Acadianvirus reprobate	Mycobacterium phage Reprobate			CG	dsDNA
GCA_002604125.1_ASM260412v1	Duplodnaviria	Heunggongvirae	Uroviricota	Caudoviricetes				Murrayvirus	NA	Escherichia virus EC2	Enterobacteria phage IME_EC2			CG	dsDNA
GCA_002604145.1_ASM260414v1	Duplodnaviria	Heunggongvirae	Uroviricota	Caudoviricetes		Casjensviridae		Salvovirus	NA	Salvovirus salvo	Xylella phage Salvo			CG	dsDNA
GCA_002604165.1_ASM260416v1	Duplodnaviria	Heunggongvirae	Uroviricota	Caudoviricetes		Casjensviridae		Sanovirus	NA	Xylella virus Sano	Xylella phage Sano			CG	dsDNA
GCA_002604185.1_ASM260418v1	Duplodnaviria	Heunggongvirae	Uroviricota	Caudoviricetes		Schitoviridae	Rothmandenesvirinae	Jwalphavirus	NA	Achromobacter phage JWDelta	Achromobacter phage JWDelta			CG	dsDNA
GCA_002604225.1_ASM260422v1	Duplodnaviria	Heunggongvirae	Uroviricota	Caudoviricetes		Autographiviridae	Okabevirinae	Ampunavirus	NA	Ampunavirus BpAMP1	Burkholderia phage Bp-AMP1			CG	dsDNA
GCA_002604545.1_ASM260454v1	Duplodnaviria	Heunggongvirae	Uroviricota	Caudoviricetes		Autographiviridae	Colwellvirinae	Gutovirus	NA	Gutovirus Vc1	Vibrio phage Vc1			CG	dsDNA
GCA_002604645.1_ASM260464v1	Duplodnaviria	Heunggongvirae	Uroviricota	Caudoviricetes		Kyanoviridae		Potamoivirus	NA	Potamoivirus tusconj	Synechococcus phage ACG-2014j			CG	dsDNA
GCA_002604825.1_ASM260482v1	Duplodnaviria	Heunggongvirae	Uroviricota	Caudoviricetes		Straboviridae	Tevenvirinae	Mosigvirus	NA	Mosigvirus 0157tp3	Escherichia coli O157 typing phage 3			CG	dsDNA
GCA_002604965.1_ASM260496v1	Duplodnaviria	Heunggongvirae	Uroviricota	Caudoviricetes				Chivirus	NA	Chivirus chi	Salmonella phage Chi			CG	dsDNA
GCA_002605285.1_ASM260528v1	Duplodnaviria	Heunggongvirae	Uroviricota	Caudoviricetes		Peduoviridae		Baylorvirus	NA	Baylorvirus bv1127AP1	Mannheimia phage vB_MhM_1127AP1			CG	dsDNA
GCA_002605405.1_ASM260540v1	Duplodnaviria	Heunggongvirae	Uroviricota	Caudoviricetes		Autographiviridae		Serkorvirus	NA	Serkorvirus ITL1	Ralstonia phage phiITL-1			CG	dsDNA
GCA_002605505.1_ASM260550v1	Duplodnaviria	Heunggongvirae	Uroviricota	Caudoviricetes		Schitoviridae		Zicotriavirus	NA	Zicotriavirus ZC03	Pseudomonas phage ZC03			CG	dsDNA
GCA_002605525.1_ASM260552v1	Duplodnaviria	Heunggongvirae	Uroviricota	Caudoviricetes		Schitoviridae		Zicotriavirus	NA	Zicotriavirus ZC08	Pseudomonas phage ZC08			CG	dsDNA
GCA_002605545.1_ASM260554v1	Duplodnaviria	Heunggongvirae	Uroviricota	Caudoviricetes				Vieuvirus	NA	Acinetobacter virus R3177	Acinetobacter phage YMC11/11/R3177			CG	dsDNA
GCA_002605605.1_ASM260560v1	Duplodnaviria	Heunggongvirae	Uroviricota	Caudoviricetes		Peduoviridae		Aptresvirus	NA	Aptresvirus AP3	Burkholderia phage vB_BceM_AP3			CG	dsDNA
GCA_002605745.1_ASM260574v1	Duplodnaviria	Heunggongvirae	Uroviricota	Caudoviricetes				Vhulanivirus	NA	Paracoccus virus Shpa	Paracoccus phage Shpa			CG	dsDNA
GCA_002606605.1_ASM260660v1	Duplodnaviria	Heunggongvirae	Uroviricota	Caudoviricetes				Menderavirus	NA	Menderavirus IMESM1	Stenotrophomonas phage IME-SM1			CG	dsDNA
GCA_002606705.1_ASM260670v1	Duplodnaviria	Heunggongvirae	Uroviricota	Caudoviricetes			Vequintavirinae	Vequintavirus	NA	Vequintavirus APECc02	Escherichia phage APECc02			CG	dsDNA
GCA_002606865.1_ASM260686v1	Duplodnaviria	Heunggongvirae	Uroviricota	Caudoviricetes				Fromanvirus	NA	Fromanvirus astro	Mycobacterium phage Astro			CG	dsDNA
GCA_002607065.1_ASM260706v1	Duplodnaviria	Heunggongvirae	Uroviricota	Caudoviricetes		Casjensviridae		Sansavirus	NA	Caulobacter virus Sansa	Caulobacter phage Sansa			CG	dsDNA
GCA_002607085.1_ASM260708v1	Duplodnaviria	Heunggongvirae	Uroviricota	Caudoviricetes				Seussvirus	NA	Caulobacter virus Seuss	Caulobacter phage Seuss			CG	dsDNA
GCA_002607125.1_ASM260712v1	Duplodnaviria	Heunggongvirae	Uroviricota	Caudoviricetes		Autographiviridae	Corkvirinae	Kotilavirus	NA	Kotilavirus PPWS1	Pectobacterium phage PPWS1			CG	dsDNA
GCA_002607285.1_ASM260728v1	Duplodnaviria	Heunggongvirae	Uroviricota	Caudoviricetes		Autographiviridae	Corkvirinae	Stompvirus	NA	Stompvirus BF2512	Dickeya phage BF25/12			CG	dsDNA
GCA_002607305.1_ASM260730v1	Duplodnaviria	Heunggongvirae	Uroviricota	Caudoviricetes		Vilmaviridae	Lclasvirinae	Lumosvirus	NA	Lumosvirus lumos	Mycobacterium phage Lumos			CG	dsDNA
GCA_002607785.1_ASM260778v1	Duplodnaviria	Heunggongvirae	Uroviricota	Caudoviricetes				Fipvunavirus	NA	Fipvunavirus Fpv4	Flavobacterium phage Fpv4			CG	dsDNA
GCA_002607875.1_ASM260787v1	Duplodnaviria	Heunggongvirae	Uroviricota	Caudoviricetes		Rountreeviridae	Sarlesvirinae	Minhovirus	NA	Minhovirus IME199	Enterococcus phage vB_EfaP_IME199			CG	dsDNA
GCA_002608095.1_ASM260809v1	Duplodnaviria	Heunggongvirae	Uroviricota	Caudoviricetes			Tybeckvirinae	Lenusvirus	NA	Lenusvirus SAC12	Lactobacillus phage SA-C12			CG	dsDNA
GCA_002608295.1_ASM260829v1	Duplodnaviria	Heunggongvirae	Uroviricota	Caudoviricetes		Drexlerviridae	Tunavirinae	Tunavirus	NA	Tunavirus JMPW1	Escherichia phage JMPW1			CG	dsDNA
GCA_002608575.1_ASM260857v1	Duplodnaviria	Heunggongvirae	Uroviricota	Caudoviricetes				Jasminevirus	NA	Jasminevirus jasmine	Arthrobacter phage Jasmine			CG	dsDNA
GCA_002608665.1_ASM260866v1	Duplodnaviria	Heunggongvirae	Uroviricota	Caudoviricetes				Laroyevirus	NA	Arthrobacter virus Salgado	Arthrobacter phage Salgado			CG	dsDNA
GCA_002608765.1_ASM260876v1	Duplodnaviria	Heunggongvirae	Uroviricota	Caudoviricetes				Galaxyvirus	NA	Galaxyvirus galaxy	Arthrobacter phage Galaxy			CG	dsDNA
GCA_002608785.1_ASM260878v1	Duplodnaviria	Heunggongvirae	Uroviricota	Caudoviricetes				Samunavirus	NA	Pseudomonas virus SM1	Pseudomonas phage SM1			CG	dsDNA
GCA_002609005.1_ASM260900v1	Duplodnaviria	Heunggongvirae	Uroviricota	Caudoviricetes		Straboviridae		Carettavirus	NA	Carettavirus e142	Escherichia phage phiE142			CG	dsDNA
GCA_002609105.1_ASM260910v1	Duplodnaviria	Heunggongvirae	Uroviricota	Caudoviricetes				Ravarandavirus	NA	Nodularia virus 2AV2	Nodularia phage vB_NpeS-2AV2			CG	dsDNA
GCA_002609265.1_ASM260926v1	Duplodnaviria	Heunggongvirae	Uroviricota	Caudoviricetes				Mimasvirus	NA	Mimasvirus CBB	Pectinobbacterium phage vB_PcaM_CBB			CG	dsDNA
GCA_002609385.1_ASM260938v1	Duplodnaviria	Heunggongvirae	Uroviricota	Caudoviricetes				Magadivirus	NA	Bacillus virus Mgbh1	Bacillus phage Mgbh1			CG	dsDNA
GCA_002609505.1_ASM260950v1	Duplodnaviria	Heunggongvirae	Uroviricota	Caudoviricetes				Plaisancevirus	NA	Plaisancevirus PMW	Pseudomonas phage phiPMW			CG	dsDNA
GCA_002609525.1_ASM260952v1	Duplodnaviria	Heunggongvirae	Uroviricota	Caudoviricetes				Chakrabartyvirus	NA	Chakrabartyvirus pf16	Pseudomonas phage pf16			CG	dsDNA
GCA_002609765.1_ASM260976v1	Duplodnaviria	Heunggongvirae	Uroviricota	Caudoviricetes				Metrivirus	NA	Metrivirus ME3	Acinetobacter phage vB_AbaM_ME3			CG	dsDNA
GCA_002610005.1_ASM261000v1	Duplodnaviria	Heunggongvirae	Uroviricota	Caudoviricetes			Tybeckvirinae	Maenadvirus	NA	Maenadvirus P1	Lactobacillus phage P1			CG	dsDNA
GCA_002610045.1_ASM261004v1	Duplodnaviria	Heunggongvirae	Uroviricota	Caudoviricetes		Autographiviridae		Napahaivirus	NA	Napahaivirus VSW3	Pseudomonas phage VSW-3			CG	dsDNA
GCA_002610145.1_ASM261014v1	Duplodnaviria	Heunggongvirae	Uroviricota	Caudoviricetes		Mesyanzhinovviridae	Bradleyvirinae	Xooduovirus	NA	Xooduovirus Xoosp2	Xanthomonas phage Xoo-sp2			CG	dsDNA
GCA_002610875.1_ASM261087v1	Duplodnaviria	Heunggongvirae	Uroviricota	Caudoviricetes				Colneyvirus	NA	Colneyvirus CDKM15	Clostridium phage CDKM15			CG	dsDNA
GCA_002610955.1_ASM261095v1	Duplodnaviria	Heunggongvirae	Uroviricota	Caudoviricetes				Hubeivirus	NA	Hubeivirus PfEFR4	Bacillus phage PfEFR-4			CG	dsDNA
GCA_002611085.1_ASM261108v1	Duplodnaviria	Heunggongvirae	Uroviricota	Caudoviricetes			Skryabinvirinae	Bembunaquatrovirus	NA	Bembunaquatrovirus BMBtp14	Bacillus phage vB_BtS_BMBtp14			CG	dsDNA
GCA_002611205.1_ASM261120v1	Duplodnaviria	Heunggongvirae	Uroviricota	Caudoviricetes		Herelleviridae	Twortvirinae	Sciuriunavirus	NA	Sciuriunavirus SscM1	Staphylococcus phage vB_SscM-1			CG	dsDNA
GCA_002611285.1_ASM261128v1	Duplodnaviria	Heunggongvirae	Uroviricota	Caudoviricetes				Vedamuthuvirus	NA	Lactococcus virus 50902	Lactococcus phage 50902			CG	dsDNA
GCA_002611385.1_ASM261138v1	Duplodnaviria	Heunggongvirae	Uroviricota	Caudoviricetes				Vedamuthuvirus	NA	Lactococcus virus 62503	Lactococcus phage 62503			CG	dsDNA
GCA_002611585.1_ASM261158v1	Duplodnaviria	Heunggongvirae	Uroviricota	Caudoviricetes		Autographiviridae		Kafavirus	NA	Kafavirus SWcelC56	Phage MedPE-SWcel-C56			CG	dsDNA
GCA_002611685.1_ASM261168v1	Duplodnaviria	Heunggongvirae	Uroviricota	Caudoviricetes				Deurplevirus	NA	Deurplevirus deeppurple	Bacillus phage Deep-Purple			CG	dsDNA
GCA_002611925.1_ASM261192v1	Duplodnaviria	Heunggongvirae	Uroviricota	Caudoviricetes				Kungbxnavirus	NA	Kungbxnavirus pT24	Tenacibaculum phage pT24			CG	dsDNA
GCA_002611945.1_ASM261194v1	Duplodnaviria	Heunggongvirae	Uroviricota	Caudoviricetes		Kwiatkowskiviridae	Stephanstirmvirinae	Phapecoctavirus	NA	Escherichia phage ESCO13	Escherichia phage ESCO13			CG	dsDNA
GCA_002612105.1_ASM261210v1	Duplodnaviria	Heunggongvirae	Uroviricota	Caudoviricetes		Straboviridae		Pseudotevenvirus	NA	Pseudotevenvirus leb	Cronobacter phage vB_CsaM_leB			CG	dsDNA
GCA_002612145.1_ASM261214v1	Duplodnaviria	Heunggongvirae	Uroviricota	Caudoviricetes				Soupsvirus	NA	Gordonia virus Strosahl	Gordonia phage Strosahl			CG	dsDNA
GCA_002612385.1_ASM261238v1	Duplodnaviria	Heunggongvirae	Uroviricota	Caudoviricetes		Peduoviridae		Playavirus	NA	Playavirus SMHB1	Salinivibrio phage SMHB1			CG	dsDNA
GCA_002612405.1_ASM261240v1	Duplodnaviria	Heunggongvirae	Uroviricota	Caudoviricetes				Weaselvirus	NA	Rhodococcus virus Weasel	Rhodococcus phage Weasels2			CG	dsDNA
GCA_002612645.1_ASM261264v1	Duplodnaviria	Heunggongvirae	Uroviricota	Caudoviricetes				Veracruzvirus	NA	Veracruzvirus babyboy	Mycobacterium phage BabyRay			CG	dsDNA
GCA_002612725.1_ASM261272v1	Duplodnaviria	Heunggongvirae	Uroviricota	Caudoviricetes		Kwiatkowskiviridae	Stephanstirmvirinae	Phapecoctavirus	NA	Escherichia virus ESCO5	Escherichia phage ESCO5			CG	dsDNA
GCA_002612775.1_ASM261277v1	Duplodnaviria	Heunggongvirae	Uroviricota	Caudoviricetes			Pclasvirinae	Tortellinivirus	NA	Mycobacterium virus Tortellini	Mycobacterium phage Tortellini			CG	dsDNA
GCA_002613105.2_ASM261310v2	Duplodnaviria	Heunggongvirae	Uroviricota	Caudoviricetes				Rimavirus	NA	Strepomyces virus Rima	Streptomyces phage Rima			CG	dsDNA
GCA_002613165.1_ASM261316v1	Duplodnaviria	Heunggongvirae	Uroviricota	Caudoviricetes				Anatolevirus	NA	Anatolevirus anatole	Propionibacterium phage Anatole			CG	dsDNA
GCA_002613185.1_ASM261318v1	Duplodnaviria	Heunggongvirae	Uroviricota	Caudoviricetes				Doucettevirus	NA	Doucettevirus B22	Propionibacterium phage B22			CG	dsDNA
GCA_002613205.1_ASM261320v1	Duplodnaviria	Heunggongvirae	Uroviricota	Caudoviricetes				Anatolevirus	NA	Anatolevirus B3	Propionibacterium phage B3			CG	dsDNA
GCA_002613225.1_ASM261322v1	Duplodnaviria	Heunggongvirae	Uroviricota	Caudoviricetes				Doucettevirus	NA	Doucettevirus doucette	Propionibacterium phage Doucette			CG	dsDNA
GCA_002613265.1_ASM261326v1	Duplodnaviria	Heunggongvirae	Uroviricota	Caudoviricetes				Doucettevirus	NA	Doucettevirus E6	Propionibacterium phage E6			CG	dsDNA
GCA_002613725.1_ASM261372v1	Duplodnaviria	Heunggongvirae	Uroviricota	Caudoviricetes		Autographiviridae	Melnykvirinae	Wanjuvirus	NA	Wanjuvirus PP2	Pectobacterium phage PP2			CG	dsDNA
GCA_002614285.1_ASM261428v1	Duplodnaviria	Heunggongvirae	Uroviricota	Caudoviricetes			Vequintavirinae	Mydovirus	NA	Mydovirus BIS47	Klebsiella phage vB_KpnM_BIS47			CG	dsDNA
GCA_002614485.1_ASM261448v1	Duplodnaviria	Heunggongvirae	Uroviricota	Caudoviricetes		Demerecviridae		Sugarlandvirus	NA	Sugarlandvirus IME260	Klebsiella phage vB_Kpn_IME260			CG	dsDNA
GCA_002614545.1_ASM261454v1	Duplodnaviria	Heunggongvirae	Uroviricota	Caudoviricetes				Jedunavirus	NA	Jedunavirus KpV80	Klebsiella phage vB_KpnM_KpV52			CG	dsDNA
GCA_002615085.1_ASM261508v1	Duplodnaviria	Heunggongvirae	Uroviricota	Caudoviricetes		Schitoviridae	Pontosvirinae	Galateavirus	NA	Galateavirus PVA5	Vibrio phage vB_VspP_pVa5			CG	dsDNA
GCA_002615145.1_ASM261514v1	Duplodnaviria	Heunggongvirae	Uroviricota	Caudoviricetes				Kamchatkavirus	NA	Kamchatkavirus AP45	Aeribacillus phage AP45			CG	dsDNA
GCA_002615185.1_ASM261518v1	Duplodnaviria	Heunggongvirae	Uroviricota	Caudoviricetes				Sashavirus	NA	Salmonella virus Sasha	Salmonella phage vB_SenS_Sasha			CG	dsDNA
GCA_002615505.1_ASM261550v1	Duplodnaviria	Heunggongvirae	Uroviricota	Caudoviricetes				Borockvirus	NA	Borockvirus brock	Streptomyces phage BRock			CG	dsDNA
GCA_002615645.1_ASM261564v1	Duplodnaviria	Heunggongvirae	Uroviricota	Caudoviricetes		Peduoviridae		Catalunyavirus	NA	Catalunyavirus C5a	Pseudoalteromonas phage C5a			CG	dsDNA
GCA_002617005.2_ASM261700v2	Duplodnaviria	Heunggongvirae	Uroviricota	Caudoviricetes		Chaseviridae	Cleopatravirinae	Suwonvirus	NA	Suwonvirus PP101	Pectobacterium phage PP101			CG	dsDNA
GCA_002617105.1_ASM261710v1	Duplodnaviria	Heunggongvirae	Uroviricota	Caudoviricetes				Austintatiousvirus	NA	Austintatiousvirus ididsumtinwong	Streptomyces phage Ididsumtinwong			CG	dsDNA
GCA_002617145.1_ASM261714v1	Duplodnaviria	Heunggongvirae	Uroviricota	Caudoviricetes				Austintatiousvirus	NA	Austintatiousvirus papayasalad	Streptomyces phage PapayaSalad			CG	dsDNA
GCA_002617165.1_ASM261716v1	Duplodnaviria	Heunggongvirae	Uroviricota	Caudoviricetes				Picardvirus	NA	Streptomyces virus Picard	Streptomyces phage Picard			CG	dsDNA
GCA_002617185.1_ASM261718v1	Duplodnaviria	Heunggongvirae	Uroviricota	Caudoviricetes				Raleighvirus	NA	Streptomyces virus Raleigh	Streptomyces phage Raleigh			CG	dsDNA
GCA_002617245.1_ASM261724v1	Duplodnaviria	Heunggongvirae	Uroviricota	Caudoviricetes		Schitoviridae	Enquartavirinae	Gamaleyavirus	NA	Gamaleyavirus EC1UPM	Escherichia phage EC1-UPM			CG	dsDNA
GCA_002617265.1_ASM261726v1	Duplodnaviria	Heunggongvirae	Uroviricota	Caudoviricetes		Schitoviridae	Migulavirinae	Litunavirus	NA	Litunavirus PA26	Pseudomonas phage PA26			CG	dsDNA
GCA_002617285.1_ASM261728v1	Duplodnaviria	Heunggongvirae	Uroviricota	Caudoviricetes				Kleczkowskavirus	NA	Kleczkowskavirus RHEph4	Rhizobium phage RHEph04			CG	dsDNA
GCA_002617325.1_ASM261732v1	Duplodnaviria	Heunggongvirae	Uroviricota	Caudoviricetes				Mardecavirus	NA	Vibrio virus SSP002	Vibrio phage SSP002			CG	dsDNA
GCA_002617345.1_ASM261734v1	Duplodnaviria	Heunggongvirae	Uroviricota	Caudoviricetes				Ripduovirus	NA	Ripduovirus RP12	Ralstonia phage RP12			CG	dsDNA
GCA_002617385.1_ASM261738v1	Duplodnaviria	Heunggongvirae	Uroviricota	Caudoviricetes		Herelleviridae	Brockvirinae	Schiekvirus	NA	Schiekvirus EFP01	Enterococcus phage EFP01			CG	dsDNA
GCA_002617405.1_ASM261740v1	Duplodnaviria	Heunggongvirae	Uroviricota	Caudoviricetes		Autographiviridae		Aqualcavirus	NA	Aqualcavirus P14	Aquamicrobium phage P14			CG	dsDNA
GCA_002617425.3_ASM261742v3	Duplodnaviria	Heunggongvirae	Uroviricota	Caudoviricetes		Autographiviridae	Studiervirinae	Pektosvirus	NA	Pektosvirus PP81	Pectobacterium phage PP81			CG	dsDNA
GCA_002617785.1_ASM261778v1	Duplodnaviria	Heunggongvirae	Uroviricota	Caudoviricetes		Demerecviridae		Priunavirus	NA	Priunavirus PR1	Providencia phage vB_PreS_PR1			CG	dsDNA
GCA_002617905.1_ASM261790v1	Duplodnaviria	Heunggongvirae	Uroviricota	Caudoviricetes		Autographiviridae		Ayakvirus	NA	Ayakvirus Ap1	Ralstonia virus phiAp1			CG	dsDNA
GCA_002617925.2_ASM261792v2	Duplodnaviria	Heunggongvirae	Uroviricota	Caudoviricetes		Autographiviridae	Studiervirinae	Pektosvirus	NA	Pektosvirus PP47	Pectobacterium phage PP47			CG	dsDNA
GCA_002617945.1_ASM261794v1	Duplodnaviria	Heunggongvirae	Uroviricota	Caudoviricetes		Autographiviridae		Gajwadongvirus	NA	Gajwadongvirus PP99	Pectobacterium phage PP99			CG	dsDNA
GCA_002618025.1_ASM261802v1	Duplodnaviria	Heunggongvirae	Uroviricota	Caudoviricetes		Autographiviridae	Colwellvirinae	Kaohsiungvirus	NA	Kaohsiungvirus Vp670	Vibrio phage Vp670			CG	dsDNA
GCA_002618065.1_ASM261806v1	Duplodnaviria	Heunggongvirae	Uroviricota	Caudoviricetes		Autographiviridae	Okabevirinae	Sukuvirus	NA	Sukuvirus RSPII1	Ralstonia phage RS-PII-1			CG	dsDNA
GCA_002618085.1_ASM261808v1	Duplodnaviria	Heunggongvirae	Uroviricota	Caudoviricetes		Autographiviridae	Melnykvirinae	Pokrovskaiavirus	NA	Pokrovskaiavirus fHeYen301	Yersinia phage fHe-Yen3-01			CG	dsDNA
GCA_002618405.1_ASM261840v1	Duplodnaviria	Heunggongvirae	Uroviricota	Caudoviricetes		Herelleviridae	Bastillevirinae	Grisebachstrassevirus	NA	Grisebachstrassevirus goe3	Bacillus phage vB_BsuM-Goe3			CG	dsDNA
GCA_002618665.1_ASM261866v1	Duplodnaviria	Heunggongvirae	Uroviricota	Caudoviricetes		Drexlerviridae	Braunvirinae	Rtpvirus	NA	Rtpvirus IME253	Escherichia phage vB_EcoS-IME253			CG	dsDNA
GCA_002618785.1_ASM261878v1	Duplodnaviria	Heunggongvirae	Uroviricota	Caudoviricetes		Drexlerviridae	Braunvirinae	Guelphvirus	NA	Guelphvirus EC3a	Escherichia phage vB_Ecos_CEB_EC3a			CG	dsDNA
GCA_002618825.1_ASM261882v1	Duplodnaviria	Heunggongvirae	Uroviricota	Caudoviricetes			Gorgonvirinae	Tidunavirus	NA	Tidunavirus pTD1	Vibrio phage pTD1			CG	dsDNA
GCA_002619185.1_ASM261918v1	Duplodnaviria	Heunggongvirae	Uroviricota	Caudoviricetes		Rountreeviridae	Rakietenvirinae	Andhravirus	NA	Andhravirus andhra	Staphylococcus phage Andhra			CG	dsDNA
GCA_002619325.1_ASM261932v1	Duplodnaviria	Heunggongvirae	Uroviricota	Caudoviricetes		Rountreeviridae	Rakietenvirinae	Andhravirus	NA	Andhravirus St134	Staphylococcus phage St 134			CG	dsDNA
GCA_002619345.1_ASM261934v1	Duplodnaviria	Heunggongvirae	Uroviricota	Caudoviricetes				Yoloswagvirus	NA	Yoloswagvirus yoloswag	Erwinia phage vB_EamM_Yoloswag			CG	dsDNA
GCA_002619365.1_ASM261936v1	Duplodnaviria	Heunggongvirae	Uroviricota	Caudoviricetes		Autographiviridae	Okabevirinae	Ampunavirus	NA	Ampunavirus RSPI1	Ralstonia phage RS-PI-1			CG	dsDNA
GCA_002619625.1_ASM261962v1	Duplodnaviria	Heunggongvirae	Uroviricota	Caudoviricetes		Peduoviridae		Reginaelenavirus	NA	Reginaelenavirus rv3LV2017	Klebsiella phage 3LV2017			CG	dsDNA
GCA_002619645.1_ASM261964v1	Duplodnaviria	Heunggongvirae	Uroviricota	Caudoviricetes		Peduoviridae		Elveevirus	NA	Elveevirus 4LV2017	Klebsiella phage 4 LV-2017			CG	dsDNA
GCA_002619725.1_ASM261972v1	Duplodnaviria	Heunggongvirae	Uroviricota	Caudoviricetes		Autographiviridae	Studiervirinae	Pektosvirus	NA	Pektosvirus PPWS4	Pectobacterium phage PPWS4 DNA			CG	dsDNA
GCA_002619745.1_ASM261974v1	Duplodnaviria	Heunggongvirae	Uroviricota	Caudoviricetes				Eneladusvirus	NA	Eneladusvirus BF	Serratia phage BF			CG	dsDNA
GCA_002619785.1_ASM261978v1	Duplodnaviria	Heunggongvirae	Uroviricota	Caudoviricetes		Drexlerviridae		Nouzillyvirus	NA	Nouzillyvirus ESCO41	Escherichia phage vB_EcoS_ESCO41			CG	dsDNA
GCA_002619805.1_ASM261980v1	Duplodnaviria	Heunggongvirae	Uroviricota	Caudoviricetes		Casjensviridae		Sessunavirus	NA	Sessunavirus SESS1	Synechococcus virus S-ESS1			CG	dsDNA
GCA_002619845.3_ASM261984v2	Duplodnaviria	Heunggongvirae	Uroviricota	Caudoviricetes				Saundersvirus	NA	Geobacillus virus Tp84	Geobacillus phage TP-84			CG	dsDNA
GCA_002619865.1_ASM261986v1	Duplodnaviria	Heunggongvirae	Uroviricota	Caudoviricetes		Straboviridae	Tevenvirinae	Tegunavirus	NA	Tegunavirus fheyen901	Yersinia phage fHe-Yen9-01			CG	dsDNA
GCA_002619945.1_ASM261994v1	Duplodnaviria	Heunggongvirae	Uroviricota	Caudoviricetes				Nanhaivirus	NA	Dinoroseobacter virus D5C	Dinoroseobacter phage vB_DshS-R5C			CG	dsDNA
GCA_002619985.1_ASM261998v1	Duplodnaviria	Heunggongvirae	Uroviricota	Caudoviricetes		Autographiviridae	Colwellvirinae	Murciavirus	NA	Murciavirus CPP1m	Marinomonas phage CPP1m			CG	dsDNA
GCA_002620365.1_ASM262036v1	Duplodnaviria	Heunggongvirae	Uroviricota	Caudoviricetes				Audreyjarvisvirus	NA	Audreyjarvisvirus AM1	Lactococcus phage AM1			CG	dsDNA
GCA_002620465.1_ASM262046v1	Duplodnaviria	Heunggongvirae	Uroviricota	Caudoviricetes				Audreyjarvisvirus	NA	Audreyjarvisvirus AM4	Lactococcus phage AM4			CG	dsDNA
GCA_002620505.1_ASM262050v1	Duplodnaviria	Heunggongvirae	Uroviricota	Caudoviricetes				Teubervirus	NA	Lactococcus virus AM6	Lactococcus phage AM6			CG	dsDNA
GCA_002620585.1_ASM262058v1	Duplodnaviria	Heunggongvirae	Uroviricota	Caudoviricetes				Teubervirus	NA	Lactococcus virus LW31	Lactococcus phage LW31			CG	dsDNA
GCA_002620725.1_ASM262072v1	Duplodnaviria	Heunggongvirae	Uroviricota	Caudoviricetes		Schitoviridae		Vicoquintavirus	NA	Vicoquintavirus Pvco5	Vibrio phage pVco-5			CG	dsDNA
GCA_002620805.1_ASM262080v1	Duplodnaviria	Heunggongvirae	Uroviricota	Caudoviricetes				Rockefellervirus	NA	Staphylococcus virus IME1348-01	Staphylococcus phage IME1348_01			CG	dsDNA
GCA_002621085.1_ASM262108v1	Duplodnaviria	Heunggongvirae	Uroviricota	Caudoviricetes				Gorganvirus	NA	Gorganvirus isfahan	Proteus phage vB_PmiS-Isfahan			CG	dsDNA
GCA_002621245.1_ASM262124v1	Duplodnaviria	Heunggongvirae	Uroviricota	Caudoviricetes		Chaseviridae	Nefertitivirinae	Yushanvirus	NA	Yushanvirus SppYZU05	Shewanella phage SppYZU05			CG	dsDNA
GCA_002622285.1_ASM262228v1	Duplodnaviria	Heunggongvirae	Uroviricota	Caudoviricetes				Skatevirus	NA	Skatevirus LPST10	Salmonella phage LPST10			CG	dsDNA
GCA_002622305.1_ASM262230v1	Varidnaviria	Bamfordvirae	Preplasmiviricota	Tectiliviricetes	Kalamavirales	Tectiviridae		Epsilontectivirus	NA	Rhodococcus virus Toil	Rhodococcus phage Toil			CG	dsDNA
GCA_002622325.1_ASM262232v1	Duplodnaviria	Heunggongvirae	Uroviricota	Caudoviricetes		Ackermannviridae		Tedavirus	NA	Tedavirus A829	Aeromonas phage phiA8-29			CG	dsDNA
GCA_002622365.1_ASM262236v1	Duplodnaviria	Heunggongvirae	Uroviricota	Caudoviricetes				Lacusarxvirus	NA	Sphingobium virus Lacusarx	Sphingobium phage Lacusarx			CG	dsDNA
GCA_002622385.1_ASM262238v1	Duplodnaviria	Heunggongvirae	Uroviricota	Caudoviricetes		Herelleviridae	Twortvirinae	Sepunavirus	NA	Sepunavirus SEP1	Staphylococcus phage phiIBB-SEP1			CG	dsDNA
GCA_002622405.1_ASM262240v1	Duplodnaviria	Heunggongvirae	Uroviricota	Caudoviricetes				Emdodecavirus	NA	Emdodecavirus M7	Sinorhizobium phage phiM7			CG	dsDNA
GCA_002622425.1_ASM262242v1	Duplodnaviria	Heunggongvirae	Uroviricota	Caudoviricetes				Marthavirus	NA	Marthavirus brent	Arthrobacter phage Brent			CG	dsDNA
GCA_002622505.1_ASM262250v1	Duplodnaviria	Heunggongvirae	Uroviricota	Caudoviricetes		Mesyanzhinovviridae	Rabinowitzvirinae	Yuavirus	NA	Pseudomonas virus LKO4	Pseudomonas phage LKO4			CG	dsDNA
GCA_002622525.1_ASM262252v1	Duplodnaviria	Heunggongvirae	Uroviricota	Caudoviricetes			Sepvirinae	Traversvirus	NA	Traversvirus PA28	Escherichia phage PA28			CG	dsDNA
GCA_002622545.1_ASM262254v1	Duplodnaviria	Heunggongvirae	Uroviricota	Caudoviricetes		Straboviridae		Krischvirus	NA	Krischvirus ecd7	Escherichia phage ECD7			CG	dsDNA
GCA_002622645.1_ASM262264v1	Duplodnaviria	Heunggongvirae	Uroviricota	Caudoviricetes		Salasmaviridae		Harambevirus	NA	Harambevirus harambe	Bacillus phage Harambe			CG	dsDNA
GCA_002622705.1_ASM262270v1	Duplodnaviria	Heunggongvirae	Uroviricota	Caudoviricetes				Korravirus	NA	Korravirus bennie	Arthrobacter phage Bennie			CG	dsDNA
GCA_002622725.1_ASM262272v1	Duplodnaviria	Heunggongvirae	Uroviricota	Caudoviricetes				Korravirus	NA	Korravirus drrobert	Arthrobacter phage DrRobert			CG	dsDNA
GCA_002622745.1_ASM262274v1	Duplodnaviria	Heunggongvirae	Uroviricota	Caudoviricetes				Korravirus	NA	Korravirus glenn	Arthrobacter phage Glenn			CG	dsDNA
GCA_002622885.1_ASM262288v1	Duplodnaviria	Heunggongvirae	Uroviricota	Caudoviricetes				Laroyevirus	NA	Arthrobacter virus Laroye	Arthrobacter phage Laroye			CG	dsDNA
GCA_002622925.1_ASM262292v1	Duplodnaviria	Heunggongvirae	Uroviricota	Caudoviricetes				Amigovirus	NA	Amigovirus amigo	Arthrobacter phage Amigo			CG	dsDNA
GCA_002622945.1_ASM262294v1	Duplodnaviria	Heunggongvirae	Uroviricota	Caudoviricetes				Demosthenesvirus	NA	Demosthenesvirus katyusha	Gordonia phage Katyusha			CG	dsDNA
GCA_002622965.1_ASM262296v1	Duplodnaviria	Heunggongvirae	Uroviricota	Caudoviricetes				Gordonvirus	NA	Gordonvirus captnmurica	Arthrobacter phage CaptnMurica			CG	dsDNA
GCA_002622985.1_ASM262298v1	Duplodnaviria	Heunggongvirae	Uroviricota	Caudoviricetes				Gordonvirus	NA	Gordonvirus gordon	Arthrobacter phage Gordon			CG	dsDNA
GCA_002623005.1_ASM262300v1	Duplodnaviria	Heunggongvirae	Uroviricota	Caudoviricetes			Queuovirinae	Nipunavirus	NA	Nipunavirus PaMx25	Pseudomonas phage PaMx25			CG	dsDNA
GCA_002623245.1_ASM262324v1	Duplodnaviria	Heunggongvirae	Uroviricota	Caudoviricetes				Xiamenvirus	NA	Roseobacter virus RDJL2	Roseobacter phage RDJL Phi 2			CG	dsDNA
GCA_002623265.1_IME-EF1	Duplodnaviria	Heunggongvirae	Uroviricota	Caudoviricetes				Saphexavirus	NA	Enterococcus virus IMEEF1	Enterococcus phage IME-EF1			CG	dsDNA
GCA_002623285.1_ASM262328v1	Duplodnaviria	Heunggongvirae	Uroviricota	Caudoviricetes				Saphexavirus	NA	Enterococcus virus SAP6	Enterococcus phage SAP6			CG	dsDNA
GCA_002623305.1_ASM262330v1	Duplodnaviria	Heunggongvirae	Uroviricota	Caudoviricetes				Tankvirus	NA	Arthrobacter virus Tank	Arthrobacter phage Tank			CG	dsDNA
GCA_002623345.1_ASM262334v1	Duplodnaviria	Heunggongvirae	Uroviricota	Caudoviricetes				Titanvirus	NA	Rhodobacter virus RcSpartan	Rhodobacter phage RcSpartan			CG	dsDNA
GCA_002623365.1_ASM262336v1	Duplodnaviria	Heunggongvirae	Uroviricota	Caudoviricetes				Kochitakasuvirus	NA	Kochitakasuvirus R18	Pseudomonas phage PhiR18			CG	dsDNA
GCA_002623425.1_ASM262342v1	Duplodnaviria	Heunggongvirae	Uroviricota	Caudoviricetes			Bclasvirinae	Pipefishvirus	NA	Pipefishvirus athena	Mycobacterium phage Athena			CG	dsDNA
GCA_002623505.1_ASM262350v1	Duplodnaviria	Heunggongvirae	Uroviricota	Caudoviricetes			Weiservirinae	Unicornvirus	NA	Unicornvirus shandong1	Mycobacterium phage Shandong1			CG	dsDNA
GCA_002623545.1_ASM262354v1	Duplodnaviria	Heunggongvirae	Uroviricota	Caudoviricetes		Salasmaviridae		Harambevirus	NA	Harambevirus beachbum	Bacillus phage BeachBum			CG	dsDNA
GCA_002623605.1_ASM262360v1	Duplodnaviria	Heunggongvirae	Uroviricota	Caudoviricetes				Nankokuvirus	NA	Nankokuvirus G1	Pseudomonas phage vB_PaeM_G1			CG	dsDNA
GCA_002623685.1_ASM262368v1	Duplodnaviria	Heunggongvirae	Uroviricota	Caudoviricetes		Kyanoviridae		Shandvirus	NA	Shandvirus sh35	Synechococcus phage S-H35			CG	dsDNA
GCA_002624025.3_ASM262402v3	Duplodnaviria	Heunggongvirae	Uroviricota	Caudoviricetes			Mclasvirinae	Bongovirus	NA	Bongovirus bongo	Mycobacterium phage Bongo			CG	dsDNA
GCA_002624045.1_ASM262404v1	Duplodnaviria	Heunggongvirae	Uroviricota	Caudoviricetes			Mclasvirinae	Reyvirus	NA	Reyvirus rey	Mycobacterium phage Rey			CG	dsDNA
GCA_002624325.1_ASM262432v1	Duplodnaviria	Heunggongvirae	Uroviricota	Caudoviricetes				Agricanvirus	NA	Agricanvirus deimos	Erwinia phage vB_EamM_Deimos-Minion			CG	dsDNA
GCA_002624405.1_ASM262440v1	Duplodnaviria	Heunggongvirae	Uroviricota	Caudoviricetes				Jimmervirus	NA	Jimmervirus jimmer	Brevibacillus phage Jimmer2			CG	dsDNA
GCA_002624425.1_ASM262442v1	Duplodnaviria	Heunggongvirae	Uroviricota	Caudoviricetes			Ounavirinae	Mooglevirus	NA	Mooglevirus mordin	Citrobacter phage Mordin			CG	dsDNA
GCA_002624445.1_ASM262444v1	Duplodnaviria	Heunggongvirae	Uroviricota	Caudoviricetes			Ounavirinae	Kolesnikvirus	NA	Kolesnikvirus M7	Erwinia phage vB_EamM-M7			CG	dsDNA
GCA_002624485.1_ASM262448v1	Duplodnaviria	Heunggongvirae	Uroviricota	Caudoviricetes		Straboviridae		Slopekvirus	NA	Slopekvirus eap3	Enterobacter phage phiEap-3			CG	dsDNA
GCA_002624525.1_ASM262452v1	Duplodnaviria	Heunggongvirae	Uroviricota	Caudoviricetes		Autographiviridae		Pradovirus	NA	Pradovirus f20	Xanthomonas phage f20-Xaj			CG	dsDNA
GCA_002624545.1_ASM262454v1	Duplodnaviria	Heunggongvirae	Uroviricota	Caudoviricetes		Autographiviridae		Pradovirus	NA	Pradovirus f30	Xanthomonas phage f30-Xaj			CG	dsDNA
GCA_002624645.1_ASM262464v1	Duplodnaviria	Heunggongvirae	Uroviricota	Caudoviricetes				Timshelvirus	NA	Timshelvirus timshel	Mycobacterium phage Timshel			CG	dsDNA
GCA_002624665.1_ASM262466v1	Duplodnaviria	Heunggongvirae	Uroviricota	Caudoviricetes				Benedictvirus	NA	Benedictvirus tiger	Mycobacterium phage Tiger			CG	dsDNA
GCA_002624685.1_ASM262468v1	Duplodnaviria	Heunggongvirae	Uroviricota	Caudoviricetes			Bclasvirinae	Rosebushvirus	NA	Rosebushvirus TA17a	Mycobacterium phage TA17A			CG	dsDNA
GCA_002624845.1_ASM262484v1	Duplodnaviria	Heunggongvirae	Uroviricota	Caudoviricetes		Autographiviridae		Wuhanvirus	NA	Wuhanvirus PHB02	Pasteurella phage vB_PmuP_PHB02			CG	dsDNA
GCA_002624865.1_ASM262486v1	Duplodnaviria	Heunggongvirae	Uroviricota	Caudoviricetes			Guernseyvirinae	Jerseyvirus	NA	Jerseyvirus AG11	Salmonella phage vB_SenS_AG11			CG	dsDNA
GCA_002625005.1_ASM262500v1	Duplodnaviria	Heunggongvirae	Uroviricota	Caudoviricetes				Noxifervirus	NA	Noxifervirus noxifer	Pseudomonas phage Noxifer			CG	dsDNA
GCA_002625025.1_ASM262502v1	Duplodnaviria	Heunggongvirae	Uroviricota	Caudoviricetes		Drexlerviridae	Tunavirinae	Tunavirus	NA	Tunavirus ISF002	Shigella�phage�vB_SsoS-ISF002			CG	dsDNA
GCA_002625125.1_ASM262512v1	Duplodnaviria	Heunggongvirae	Uroviricota	Caudoviricetes		Autographiviridae		Wuhanvirus	NA	Wuhanvirus PHB01	Pasteurella phage PHB01			CG	dsDNA
GCA_002625165.1_ASM262516v1	Duplodnaviria	Heunggongvirae	Uroviricota	Caudoviricetes		Straboviridae	Tevenvirinae	Winklervirus	NA	Winklervirus chi14	Serratia phage CHI14			CG	dsDNA
GCA_002625185.1_ASM262518v1	Duplodnaviria	Heunggongvirae	Uroviricota	Caudoviricetes		Straboviridae	Tevenvirinae	Winklervirus	NA	Winklervirus xtwenty	Serratia phage X20			CG	dsDNA
GCA_002625205.1_ASM262520v1	Duplodnaviria	Heunggongvirae	Uroviricota	Caudoviricetes				Busanvirus	NA	Busanvirus ACP17	Acidovorax phage ACP17			CG	dsDNA
GCA_002625425.1_ASM262542v1	Duplodnaviria	Heunggongvirae	Uroviricota	Caudoviricetes			Hendrixvirinae	Wongtaivirus	NA	Wongtaivirus ECP1	Escherichia phage ECP1			CG	dsDNA
GCA_002625485.1_ASM262548v1	Duplodnaviria	Heunggongvirae	Uroviricota	Caudoviricetes			Weiservirinae	Keshuvirus	NA	Keshuvirus hurricane	Mycobacterium phage Hurricane			CG	dsDNA
GCA_002625565.1_ASM262556v1	Duplodnaviria	Heunggongvirae	Uroviricota	Caudoviricetes				Marthavirus	NA	Marthavirus beans	Arthrobacter phage Beans			CG	dsDNA
GCA_002625605.1_ASM262560v1	Duplodnaviria	Heunggongvirae	Uroviricota	Caudoviricetes			Weiservirinae	Amginevirus	NA	Amginevirus amgine	Mycobacterium phage Amgine			CG	dsDNA
GCA_002625665.1_ASM262566v1	Duplodnaviria	Heunggongvirae	Uroviricota	Caudoviricetes			Weiservirinae	Unicornvirus	NA	Unicornvirus krueger	Mycobacterium phage Krueger			CG	dsDNA
GCA_002625945.1_ASM262594v1	Duplodnaviria	Heunggongvirae	Uroviricota	Caudoviricetes				Klausavirus	NA	Klausavirus colucci	Arthrobacter phage Colucci			CG	dsDNA
GCA_002626045.1_ASM262604v1	Duplodnaviria	Heunggongvirae	Uroviricota	Caudoviricetes				Amigovirus	NA	Amigovirus molivia	Arthrobacter phage Molivia			CG	dsDNA
GCA_002626265.2_ASM262626v2	Duplodnaviria	Heunggongvirae	Uroviricota	Caudoviricetes				Poushouvirus	NA	Corynebacterium virus Poushou	Corynebacterium phage Poushou			CG	dsDNA
GCA_002626285.1_ASM262628v1	Duplodnaviria	Heunggongvirae	Uroviricota	Caudoviricetes				Galaxyvirus	NA	Galaxyvirus abidatro	Arthrobacter phage Abidatro			CG	dsDNA
GCA_002626425.1_ASM262642v1	Duplodnaviria	Heunggongvirae	Uroviricota	Caudoviricetes				Laroyevirus	NA	Arthrobacter virus LiSara	Arthrobacter phage LiSara			CG	dsDNA
GCA_002626705.1_ASM262670v1	Duplodnaviria	Heunggongvirae	Uroviricota	Caudoviricetes			Weiservirinae	Amginevirus	NA	Amginevirus amohnition	Mycobacterium phage Amohnition			CG	dsDNA
GCA_002626805.1_ASM262680v1	Duplodnaviria	Heunggongvirae	Uroviricota	Caudoviricetes			Weiservirinae	Amginevirus	NA	Amginevirus darthP	Mycobacterium phage DarthP			CG	dsDNA
GCA_002626865.1_ASM262686v1	Duplodnaviria	Heunggongvirae	Uroviricota	Caudoviricetes			Weiservirinae	Timquatrovirus	NA	Timquatrovirus findley	Mycobacterium phage Findley			CG	dsDNA
GCA_002626925.1_ASM262692v1	Duplodnaviria	Heunggongvirae	Uroviricota	Caudoviricetes		Vilmaviridae	Lclasvirinae	Lumosvirus	NA	Lumosvirus krypton555	Mycobacterium phage Krypton555			CG	dsDNA
GCA_002627065.1_ASM262706v1	Duplodnaviria	Heunggongvirae	Uroviricota	Caudoviricetes		Autographiviridae		Foturvirus	NA	Foturvirus H44	Alteromonas virus vB_AspP-H4/4			CG	dsDNA
GCA_002627245.1_ASM262724v1	Duplodnaviria	Heunggongvirae	Uroviricota	Caudoviricetes		Salasmaviridae	Picovirinae	Salasvirus	NA	Salasvirus Goe6	Bacillus phage vB_BveP-Goe6			CG	dsDNA
GCA_002627265.1_ASM262726v1	Duplodnaviria	Heunggongvirae	Uroviricota	Caudoviricetes		Autographiviridae	Colwellvirinae	Murciavirus	NA	Murciavirus CB5A	Marinomonas phage CB5A			CG	dsDNA
GCA_002627285.1_ASM262728v1	Varidnaviria	Bamfordvirae	Preplasmiviricota	Ainoaviricetes	Lautamovirales	Finnlakeviridae		Finnlakevirus	NA	Flavobacterium virus FLiP	Flavobacterium phage FLiP	FLiP		CG	ssDNA
GCA_002627525.1_ASM262752v1	Duplodnaviria	Heunggongvirae	Uroviricota	Caudoviricetes		Kyanoviridae		Bellamyvirus	NA	Bellamyvirus bellamy	Synechococcus phage Bellamy			CG	dsDNA
GCA_002627545.1_ASM262754v1	Duplodnaviria	Heunggongvirae	Uroviricota	Caudoviricetes				Qingdaovirus	NA	Qingdaovirus J21	Pseudoalteromonas phage J2-1			CG	dsDNA
GCA_002627665.1_ASM262766v1	Duplodnaviria	Heunggongvirae	Uroviricota	Caudoviricetes		Straboviridae	Emmerichvirinae	Ceceduovirus	NA	Ceceduovirus aszj	Aeromonas phage AS-zj			CG	dsDNA
GCA_002627745.1_ASM262774v1	Duplodnaviria	Heunggongvirae	Uroviricota	Caudoviricetes				Coventryvirus	NA	Coventryvirus SN8	Staphylococcus phage SN8			CG	dsDNA
GCA_002627945.1_ASM262794v1	Duplodnaviria	Heunggongvirae	Uroviricota	Caudoviricetes		Casjensviridae		Yonseivirus	NA	Yonseivirus N137	Klebsiella phage KPN N137			CG	dsDNA
GCA_002628125.1_ASM262812v1	Duplodnaviria	Heunggongvirae	Uroviricota	Caudoviricetes				Moabitevirus	NA	Moabitevirus mv2050HW	Serratia phage vB_SmaM_ 2050HW			CG	dsDNA
GCA_002628185.1_ASM262818v1	Duplodnaviria	Heunggongvirae	Uroviricota	Caudoviricetes		Autographiviridae		Atuphduovirus	NA	Atuphduovirus atuph02	Agrobacterium phage Atu_ph02			CG	dsDNA
GCA_002628205.1_ASM262820v1	Duplodnaviria	Heunggongvirae	Uroviricota	Caudoviricetes		Autographiviridae		Atuphduovirus	NA	Atuphduovirus atuph03	Agrobacterium phage Atu_ph03			CG	dsDNA
GCA_002628245.1_ASM262824v1	Duplodnaviria	Heunggongvirae	Uroviricota	Caudoviricetes				Polybotosvirus	NA	Polybotosvirus Atuph07	Agrobacterium phage Atu_ph07			CG	dsDNA
GCA_002628485.1_ASM262848v1	Duplodnaviria	Heunggongvirae	Uroviricota	Caudoviricetes				Rimavirus	NA	Strepomyces virus Drgrey	Streptomyces phage DrGrey			CG	dsDNA
GCA_002628705.1_ASM262870v1	Duplodnaviria	Heunggongvirae	Uroviricota	Caudoviricetes				Kimonavirus	NA	Kimonavirus kimona	Mycobacterium phage Kimona			CG	dsDNA
GCA_002628785.1_ASM262878v1	Duplodnaviria	Heunggongvirae	Uroviricota	Caudoviricetes			Gclasvirinae	Avocadovirus	NA	Avocadovirus avocado	Mycobacterium phage Avocado			CG	dsDNA
GCA_002628805.1_ASM262880v1	Duplodnaviria	Heunggongvirae	Uroviricota	Caudoviricetes				Myradeevirus	NA	Myradeevirus MyraDee	Mycobacterium phage MyraDee			CG	dsDNA
GCA_002628865.1_ASM262886v1	Duplodnaviria	Heunggongvirae	Uroviricota	Caudoviricetes		Drexlerviridae	Rogunavirinae	Wilsonroadvirus	NA	Wilsonroadvirus Sd1	Shigella phage Sd1			CG	dsDNA
GCA_002628885.1_ASM262888v1	Duplodnaviria	Heunggongvirae	Uroviricota	Caudoviricetes				Cedarrivervirus	NA	Cedarrivervirus Sf11	Shigella phage Sf11 SMD-2017			CG	dsDNA
GCA_002628905.1_ASM262890v1	Duplodnaviria	Heunggongvirae	Uroviricota	Caudoviricetes		Drexlerviridae	Rogunavirinae	Eastlansingvirus	NA	Eastlansingvirus Sf12	Shigella phage Sf12			CG	dsDNA
GCA_002628925.1_ASM262892v1	Duplodnaviria	Heunggongvirae	Uroviricota	Caudoviricetes			Ounavirinae	Mooglevirus	NA	Mooglevirus Sf13	Shigella phage Sf13			CG	dsDNA
GCA_002629045.1_ASM262904v1	Duplodnaviria	Heunggongvirae	Uroviricota	Caudoviricetes				Risingsunvirus	NA	Risingsunvirus risingsun	Erwinia phage vB_EamM_RisingSun			CG	dsDNA
GCA_002629125.1_ASM262912v1	Duplodnaviria	Heunggongvirae	Uroviricota	Caudoviricetes		Casjensviridae		Seodaemunguvirus	NA	Seodaemunguvirus YMC16-01N133	Klebsiella phage YMC16/01/N133_KPN_BP			CG	dsDNA
GCA_002629165.1_ASM262916v1	Duplodnaviria	Heunggongvirae	Uroviricota	Caudoviricetes				Lastavirus	NA	Lastavirus sopranogao	Klebsiella phage SopranoGao			CG	dsDNA
GCA_002629205.1_ASM262920v1	Duplodnaviria	Heunggongvirae	Uroviricota	Caudoviricetes				Jasminevirus	NA	Jasminevirus adat	Arthrobacter phage Adat			CG	dsDNA
GCA_002629305.1_ASM262930v1	Duplodnaviria	Heunggongvirae	Uroviricota	Caudoviricetes				Luckybarnesvirus	NA	Brevibacterium virus LuckyBarnes	Brevibacterium phage LuckyBarnes			CG	dsDNA
GCA_002629525.1_ASM262952v1	Duplodnaviria	Heunggongvirae	Uroviricota	Caudoviricetes			Ceeclamvirinae	Myrnavirus	NA	Myranavirus phabba	Mycobacterium phage Phabba			CG	dsDNA
GCA_002629885.1_ASM262988v1	Duplodnaviria	Heunggongvirae	Uroviricota	Caudoviricetes				Sandinevirus	NA	Lactococcus virus BK5T	Lactococcus phage BK5-T			CG	dsDNA
GCA_002630805.1_ASM263080v1	Duplodnaviria	Heunggongvirae	Uroviricota	Caudoviricetes				Obolenskvirus	NA	Obolenskvirus AB1	Acinetobacter phage AB1			CG	dsDNA
GCA_002630905.1_ASM263090v1	Duplodnaviria	Heunggongvirae	Uroviricota	Caudoviricetes				Eiauvirus	NA	Eiauvirus eiAU	Edwardsiella phage eiAU			CG	dsDNA
GCA_002630925.1_ASM263092v1	Duplodnaviria	Heunggongvirae	Uroviricota	Caudoviricetes		Peduoviridae		Seongnamvirus	NA	Seongnamvirus ESSI2	Cronobacter phage ESSI-2			CG	dsDNA
GCA_002632565.1_ASM263256v1	Duplodnaviria	Heunggongvirae	Uroviricota	Caudoviricetes			Weiservirinae	Anayavirus	NA	Anayavirus adephagia	Mycobacterium phage Adephagia			CG	dsDNA
GCA_002632605.1_ASM263260v1	Duplodnaviria	Heunggongvirae	Uroviricota	Caudoviricetes				Backyardiganvirus	NA	Backyardiganvirus backyardigan	Mycobacterium phage Backyardigan			CG	dsDNA
GCA_002632735.1_ASM263273v1	Duplodnaviria	Heunggongvirae	Uroviricota	Caudoviricetes				Gladiatorvirus	NA	Gladiatorvirus gladiator	Mycobacterium phage Gladiator			CG	dsDNA
GCA_002632795.1_ASM263279v1	Duplodnaviria	Heunggongvirae	Uroviricota	Caudoviricetes		Vilmaviridae	Lclasvirinae	Bronvirus	NA	Mycobacterium virus JoeDirt	Mycobacterium phage JoeDirt			CG	dsDNA
GCA_002633045.1_ASM263304v1	Duplodnaviria	Heunggongvirae	Uroviricota	Caudoviricetes				Marienburgvirus	NA	Escherichia virus JLK2012	Escherichia phage JLK-2012			CG	dsDNA
GCA_002633435.1_ASM263343v1	Duplodnaviria	Heunggongvirae	Uroviricota	Caudoviricetes	Crassvirales	Suoliviridae		Dechshavirus	NA	Dechshavirus japanensis	Azobacteroides phage ProJPt-Bp1			CG	dsDNA
GCA_002633455.1_ASM263345v1	Duplodnaviria	Heunggongvirae	Uroviricota	Caudoviricetes				Marvinvirus	NA	Mycobacterium virus Marvin	Mycobacterium phage Marvin			CG	dsDNA
GCA_002633475.1_ASM263347v1	Duplodnaviria	Heunggongvirae	Uroviricota	Caudoviricetes				Papyrusvirus	NA	Mycobacterium virus Send513	Mycobacterium phage Send513			CG	dsDNA
GCA_002633545.1_ASM263354v1	Duplodnaviria	Heunggongvirae	Uroviricota	Caudoviricetes				Veracruzvirus	NA	Veracruzvirus rockstar	Veracruzvirus Rockstar			CG	dsDNA
GCA_002709675.1_ASM270967v1	Duplodnaviria	Heunggongvirae	Uroviricota	Caudoviricetes				Microwolfvirus	NA	Microwolfvirus JHC117	Mycobacterium phage JHC117			CG	dsDNA
GCA_002709905.1_ASM270990v1	Duplodnaviria	Heunggongvirae	Uroviricota	Caudoviricetes			Vequintavirinae	Mydovirus	NA	Mydovirus KNP2	Klebsiella phage KNP2			CG	dsDNA
GCA_002710125.1_ASM271012v1	Duplodnaviria	Heunggongvirae	Uroviricota	Caudoviricetes			Brucestockervirinae	Roufvirus	NA	Roufvirus pIS4A	Aeromonas phage pIS4-A			CG	dsDNA
GCA_002743535.1_ASM274353v1	Duplodnaviria	Heunggongvirae	Uroviricota	Caudoviricetes		Guelinviridae	Denniswatsonvirinae	Gregsiragusavirus	NA	Gregsiragusavirus CPS1	Clostridium phage CPS1			CG	dsDNA
GCA_002743595.1_ASM274359v1	Duplodnaviria	Heunggongvirae	Uroviricota	Caudoviricetes		Autographiviridae		Lullwatervirus	NA	Lullwatervirus lullwater	Caulobacter phage Lullwater			CG	dsDNA
GCA_002743655.1_ASM274365v1	Duplodnaviria	Heunggongvirae	Uroviricota	Caudoviricetes				Trinavirus	NA	Rhodococcus virus Trina	Rhodococcus phage Trina			CG	dsDNA
GCA_002743695.1_ASM274369v1	Duplodnaviria	Heunggongvirae	Uroviricota	Caudoviricetes				Phabquatrovirus	NA	Phabquatrovirus PHB04	Bordetella phage vB_BbrM_PHB04			CG	dsDNA
GCA_002743735.1_ASM274373v1	Duplodnaviria	Heunggongvirae	Uroviricota	Caudoviricetes			Arquatrovirinae	Omarvirus	NA	Omarvirus amethyst	Streptomyces phage Amethyst			CG	dsDNA
GCA_002743755.1_ASM274375v1	Duplodnaviria	Heunggongvirae	Uroviricota	Caudoviricetes			Arquatrovirinae	Caelumvirus	NA	Caelumvirus daudau	Streptomyces phage Daudau			CG	dsDNA
GCA_002743775.1_ASM274377v1	Duplodnaviria	Heunggongvirae	Uroviricota	Caudoviricetes			Arquatrovirinae	Omarvirus	NA	Omarvirus diane	Streptomyces phage Diane			CG	dsDNA
GCA_002743835.1_ASM274383v1	Duplodnaviria	Heunggongvirae	Uroviricota	Caudoviricetes		Herelleviridae		Elpedvirus	NA	Elpedvirus LpeD	Lactobacillus phage LpeD			CG	dsDNA
GCA_002743855.1_ASM274385v1	Duplodnaviria	Heunggongvirae	Uroviricota	Caudoviricetes				Sortsnevirus	NA	Sortsnevirus IME279	Klebsiella phage vB_KpnS_IME279			CG	dsDNA
GCA_002743875.1_ASM274387v1	Duplodnaviria	Heunggongvirae	Uroviricota	Caudoviricetes				Jedunavirus	NA	Jedunavirus KpV52	Klebsiella phage vB_KpnM_KpV79			CG	dsDNA
GCA_002743955.1_ASM274395v1	Duplodnaviria	Heunggongvirae	Uroviricota	Caudoviricetes		Vilmaviridae		Kumaovirus	NA	Kumaovirus kumao	Mycobacterium phage Kumao			CG	dsDNA
GCA_002744035.1_ASM274403v1	Duplodnaviria	Heunggongvirae	Uroviricota	Caudoviricetes				Scapunavirus	NA	Streptomyces virus Scap1	Streptomyces phage Scap1			CG	dsDNA
GCA_002744055.1_ASM274405v1	Duplodnaviria	Heunggongvirae	Uroviricota	Caudoviricetes		Drexlerviridae	Tunavirinae	Sertoctavirus	NA	Sertoctavirus SRT8	Escherichia phage SRT8			CG	dsDNA
GCA_002744075.1_ASM274407v1	Duplodnaviria	Heunggongvirae	Uroviricota	Caudoviricetes		Straboviridae	Tevenvirinae	Gelderlandvirus	NA	Gelderlandvirus melville	Salmonella phage Melville			CG	dsDNA
GCA_002744095.1_ASM274409v1	Duplodnaviria	Heunggongvirae	Uroviricota	Caudoviricetes				Junavirus	NA	Junavirus LJ	Lactobacillus phage LJ			CG	dsDNA
GCA_002744155.1_ASM274415v1	Duplodnaviria	Heunggongvirae	Uroviricota	Caudoviricetes		Zierdtviridae	Petrovskivirinae	Kablunavirus	NA	Kablunavirus kabluna	Gordonia phage Kabluna			CG	dsDNA
GCA_002744185.1_ASM274418v1	Duplodnaviria	Heunggongvirae	Uroviricota	Caudoviricetes				Vividuovirus	NA	Gordonia virus Lennon	Gordonia phage Lennon			CG	dsDNA
GCA_002744295.1_ASM274429v1	Duplodnaviria	Heunggongvirae	Uroviricota	Caudoviricetes				Turbidovirus	NA	Turbidovirus anselm	Mycobacterium phage Anselm			CG	dsDNA
GCA_002744525.1_ASM274452v1	Duplodnaviria	Heunggongvirae	Uroviricota	Caudoviricetes			Gracegardnervirinae	Avanivirus	NA	Avanivirus demsculpinboyz	Mycobacterium phage Demsculpinboyz			CG	dsDNA
GCA_002745795.1_ASM274579v1	Duplodnaviria	Heunggongvirae	Uroviricota	Caudoviricetes		Autographiviridae	Melnykvirinae	Ahphunavirus	NA	Ahphunavirus CF7	Aeromonas phage CF7			CG	dsDNA
GCA_002745815.1_ASM274581v1	Duplodnaviria	Heunggongvirae	Uroviricota	Caudoviricetes		Autographiviridae	Melnykvirinae	Ahphunavirus	NA	Ahphunavirus Ahp1	Aeromonas phage Ahp1			CG	dsDNA
GCA_002745835.1_ASM274583v1	Duplodnaviria	Heunggongvirae	Uroviricota	Caudoviricetes		Ackermannviridae		Taipeivirus	NA	Taipeivirus IME250	Serratia phage vB_Sru_IME250			CG	dsDNA
GCA_002755055.1_ASM275505v1	Duplodnaviria	Heunggongvirae	Uroviricota	Caudoviricetes		Salasmaviridae	Picovirinae	Beecentumtrevirus	NA	Beecentumtrevirus Nf	Bacillus phage Nf			CG	dsDNA
GCA_002755275.1_ASM275527v1	Duplodnaviria	Heunggongvirae	Uroviricota	Caudoviricetes		Autographiviridae		Cuernavacavirus	NA	Cuernavacavirus RHEph02	Rhizobium phage RHEph02			CG	dsDNA
GCA_002755335.1_ASM275533v1	Duplodnaviria	Heunggongvirae	Uroviricota	Caudoviricetes		Autographiviridae		Cuernavacavirus	NA	Cuernavacavirus RHEph08	Rhizobium phage RHEph08			CG	dsDNA
GCA_002755355.1_ASM275535v1	Duplodnaviria	Heunggongvirae	Uroviricota	Caudoviricetes		Autographiviridae		Cuernavacavirus	NA	Cuernavacavirus RHEph09	Rhizobium phage RHEph09			CG	dsDNA
GCA_002756615.1_ASM275661v1	Duplodnaviria	Heunggongvirae	Uroviricota	Caudoviricetes				Cronusvirus	NA	Cronusvirus cronus	Rhodobacter phage RcCronus			CG	dsDNA
GCA_002756695.1_ASM275669v1	Duplodnaviria	Heunggongvirae	Uroviricota	Caudoviricetes			Bclasvirinae	Rosebushvirus	NA	Rosebushvirus godines	Mycobacterium phage Godines			CG	dsDNA
GCA_002756735.1_ASM275673v1	Duplodnaviria	Heunggongvirae	Uroviricota	Caudoviricetes			Arquatrovirinae	Likavirus	NA	Likavirus aaronocolus	Streptomyces phage Aaronocolus			CG	dsDNA
GCA_002757255.1_ASM275725v1	Duplodnaviria	Heunggongvirae	Uroviricota	Caudoviricetes				Flaumdravirus	NA	Flaumdravirus KIL2	Pseudomonas phage vB_PsyM_KIL4			CG	dsDNA
GCA_002758035.1_ASM275803v1	Duplodnaviria	Heunggongvirae	Uroviricota	Caudoviricetes				Machinavirus	NA	Machinavirus machina	Erwinia phage Machina			CG	dsDNA
GCA_002758635.1_ASM275863v1	Duplodnaviria	Heunggongvirae	Uroviricota	Caudoviricetes				Lambdavirus	NA	Escherichia virus DE3	Escherichia phage DE3			CG	dsDNA
GCA_002827845.1_ASM282784v1	Duplodnaviria	Heunggongvirae	Uroviricota	Caudoviricetes				Phikzvirus	NA	Phikzvirus PA7	Pseudomonas phage PA7			Partial genome	dsDNA
GCA_002829825.1_ASM282982v1	Varidnaviria	Helvetiavirae	Dividoviricota	Laserviricetes	Halopanivirales	Simuloviridae		Yingchengvirus	NA	Yingchengvirus SNJ1	Saline Natrinema sp. J7 virus 1	SNJ1		CG	dsDNA
GCA_002831125.1_ASM283112v1	Duplodnaviria	Heunggongvirae	Uroviricota	Caudoviricetes		Drexlerviridae	Tempevirinae	Tlsvirus	NA	Tlsvirus SP126	Salmonella phage FSL SP-126			PG	dsDNA
GCA_002866965.1_ASM286696v1	Duplodnaviria	Heunggongvirae	Uroviricota	Caudoviricetes				Microwolfvirus	NA	Microwolfvirus microwolf	Mycobacterium phage Microwolf			CG	dsDNA
GCA_002921615.1_ASM292161v1	Duplodnaviria	Heunggongvirae	Uroviricota	Caudoviricetes				Spizizenvirus	NA	Bacillus virus phi105	Bacillus phage phi105			CG	dsDNA
GCA_002921755.1_ASM292175v1	Duplodnaviria	Heunggongvirae	Uroviricota	Caudoviricetes		Kyanoviridae		Chalconvirus	NA	Chalconvirus acg2014e	Synechococcus phage ACG-2014e			CG	dsDNA
GCA_002922185.1_ASM292218v1	Duplodnaviria	Heunggongvirae	Uroviricota	Caudoviricetes		Kyanoviridae		Alisovirus	NA	Alisovirus socal22	Synechococcus phage S-CAM22			CG	dsDNA
GCA_002922425.1_ASM292242v1	Duplodnaviria	Heunggongvirae	Uroviricota	Caudoviricetes		Straboviridae	Tevenvirinae	Moonvirus	NA	Moonvirus cf1	Citrobacter phage CF1 ERZ-2017			CG	dsDNA
GCA_002954945.1_ASM295494v1	Duplodnaviria	Heunggongvirae	Uroviricota	Caudoviricetes		Mesyanzhinovviridae	Rabinowitzvirinae	Vojvodinavirus	NA	Bordetella virus CN2	Bordetella phage CN2			CG	dsDNA
GCA_002954955.1_ASM295495v1	Duplodnaviria	Heunggongvirae	Uroviricota	Caudoviricetes		Mesyanzhinovviridae	Rabinowitzvirinae	Vojvodinavirus	NA	Bordetella virus FP1	Bordetella phage FP1			CG	dsDNA
GCA_002954965.1_ASM295496v1	Duplodnaviria	Heunggongvirae	Uroviricota	Caudoviricetes		Mesyanzhinovviridae	Rabinowitzvirinae	Vojvodinavirus	NA	Bordetella virus CN1	Bordetella phage CN1			CG	dsDNA
GCA_002955045.1_ASM295504v1	Duplodnaviria	Heunggongvirae	Uroviricota	Caudoviricetes				Sasquatchvirus	NA	Sasquatchvirus Y3	Erwinia phage vB_EamM_Y3			CG	dsDNA
GCA_002955075.1_ASM295507v1	Duplodnaviria	Heunggongvirae	Uroviricota	Caudoviricetes		Demerecviridae	Ermolyevavirinae	Jesfedecavirus	NA	Jesfedecavirus JSF10	Vibrio phage JSF10			CG	dsDNA
GCA_002955095.1_ASM295509v1	Duplodnaviria	Heunggongvirae	Uroviricota	Caudoviricetes		Demerecviridae	Ermolyevavirinae	Jesfedecavirus	NA	Jesfedecavirus JSF12	Vibrio phage JSF12			CG	dsDNA
GCA_002955985.1_ASM295598v1	Duplodnaviria	Heunggongvirae	Uroviricota	Caudoviricetes				Pbunavirus	NA	Pbunavirus E215	Pseudomonas phage vB_PaeM_E215			CG	dsDNA
GCA_002956015.1_ASM295601v1	Duplodnaviria	Heunggongvirae	Uroviricota	Caudoviricetes				Phikzvirus	NA	Phikzvirus SL2	Pseudomonas phage SL2			CG	dsDNA
GCA_002956045.1_ASM295604v1	Duplodnaviria	Heunggongvirae	Uroviricota	Caudoviricetes		Autographiviridae	Studiervirinae	Unyawovirus	NA	Unyawovirus DUPPII	Pectobacterium phage DU_PP_II			CG	dsDNA
GCA_002956075.1_ASM295607v1	Duplodnaviria	Heunggongvirae	Uroviricota	Caudoviricetes		Demerecviridae	Mccorquodalevirinae	Hongcheonvirus	NA	Hongcheonvirus DUPPV	Pectobacterium phage DU_PP_V			CG	dsDNA
GCA_002956085.1_ASM295608v1	Duplodnaviria	Heunggongvirae	Uroviricota	Caudoviricetes		Autographiviridae		Gyeongsanvirus	NA	Gyeongsanvirus DURPI	Ralstonia phage DU_RP_I			CG	dsDNA
GCA_002956095.1_ASM295609v1	Duplodnaviria	Heunggongvirae	Uroviricota	Caudoviricetes		Zierdtviridae	Petrovskivirinae	Skysandvirus	NA	Skysandvirus patio	Gordonia phage Patio			CG	dsDNA
GCA_002956145.1_ASM295614v1	Duplodnaviria	Heunggongvirae	Uroviricota	Caudoviricetes				Delepquintavirus	NA	Delepquintavirus DLP5	Stenotrophomonas phage vB_SmaS_DLP_5			CG	dsDNA
GCA_002956205.1_ASM295620v1	Duplodnaviria	Heunggongvirae	Uroviricota	Caudoviricetes		Autographiviridae		Ermolevavirus	NA	Ermolevavirus PGT2	Escherichia phage PGT2			CG	dsDNA
GCA_002956215.1_ASM295621v1	Varidnaviria	Bamfordvirae	Preplasmiviricota	Tectiliviricetes	Kalamavirales	Tectiviridae		Gammatectivirus	NA	Gluconobacter virus GC1	Gluconobacter phage GC1			CG	dsDNA
GCA_002956225.1_ASM295622v1	Duplodnaviria	Heunggongvirae	Uroviricota	Caudoviricetes			Guernseyvirinae	Kagunavirus	NA	Kagunavirus golestan	Escherichia phage vB_EcoS-Golestan			CG	dsDNA
GCA_002956255.1_ASM295625v1	Duplodnaviria	Heunggongvirae	Uroviricota	Caudoviricetes			Langleyhallvirinae	Getalongvirus	NA	Getalongvirus bentherdunthat	Gordonia phage BENtherdunthat			CG	dsDNA
GCA_002956295.1_ASM295629v1	Duplodnaviria	Heunggongvirae	Uroviricota	Caudoviricetes			Nclasvirinae	Charlievirus	NA	Charlievirus Andies	Mycobacterium phage Andies			CG	dsDNA
GCA_002956465.1_ASM295646v1	Duplodnaviria	Heunggongvirae	Uroviricota	Caudoviricetes		Zierdtviridae	Toshachvirinae	Ceetrepovirus	NA	Corynebacterium virus C3PO	Corynebacterium phage C3PO			CG	dsDNA
GCA_002956475.1_ASM295647v1	Duplodnaviria	Heunggongvirae	Uroviricota	Caudoviricetes		Zierdtviridae	Toshachvirinae	Ceetrepovirus	NA	Corynebacterium virus Darwin	Corynebacterium phage Darwin			CG	dsDNA
GCA_002956495.1_ASM295649v1	Duplodnaviria	Heunggongvirae	Uroviricota	Caudoviricetes		Zierdtviridae	Toshachvirinae	Ceetrepovirus	NA	Corynebacterium virus Zion	Corynebacterium phage Zion			CG	dsDNA
GCA_002956505.1_ASM295650v1	Duplodnaviria	Heunggongvirae	Uroviricota	Caudoviricetes				Gustavvirus	NA	Gustavvirus gustav	Gordonia phage Gustav			CG	dsDNA
GCA_002956515.1_ASM295651v1	Duplodnaviria	Heunggongvirae	Uroviricota	Caudoviricetes				Gustavvirus	NA	Gustavvirus mahdia	Gordonia phage Mahdia			CG	dsDNA
GCA_002957125.1_ASM295712v1	Duplodnaviria	Heunggongvirae	Uroviricota	Caudoviricetes		Casjensviridae		Lavrentievavirus	NA	Lavrentieva PM87	Proteus phage PM87			CG	dsDNA
GCA_002957135.1_ASM295713v1	Duplodnaviria	Heunggongvirae	Uroviricota	Caudoviricetes		Demerecviridae		Novosibvirus	NA	Novosibvirus PM135	Proteus phage PM135			CG	dsDNA
GCA_002957145.1_ASM295714v1	Duplodnaviria	Heunggongvirae	Uroviricota	Caudoviricetes		Drexlerviridae	Braunvirinae	Loudonvirus	NA	Loudonvirus DTL	Escherichia phage DTL			CG	dsDNA
GCA_002957155.1_ASM295715v1	Duplodnaviria	Heunggongvirae	Uroviricota	Caudoviricetes		Schitoviridae	Rothmandenesvirinae	Inbricusvirus	NA	Inbricusvirus inbricus	Pseudomonas phage inbricus			CG	dsDNA
GCA_002957165.1_ASM295716v1	Duplodnaviria	Heunggongvirae	Uroviricota	Caudoviricetes				Nickievirus	NA	Pseudomonas virus nickie	Pseudomonas phage nickie			CG	dsDNA
GCA_002957175.1_ASM295717v1	Duplodnaviria	Heunggongvirae	Uroviricota	Caudoviricetes				Tabernariusvirus	NA	Tabernariusvirus tabernarius	Pseudomonas phage tabernarius			CG	dsDNA
GCA_002957245.1_ASM295724v1	Duplodnaviria	Heunggongvirae	Uroviricota	Caudoviricetes				Peatvirus	NA	Peatvirus peat2	Pectinobacterium phage PEAT2			CG	dsDNA
GCA_002957275.2_ASM295727v2	Duplodnaviria	Heunggongvirae	Uroviricota	Caudoviricetes		Demerecviridae		Sugarlandvirus	NA	Sugarlandvirus sugarland	Klebsiella phage Sugarland			CG	dsDNA
GCA_002957305.1_ASM295730v1	Duplodnaviria	Heunggongvirae	Uroviricota	Caudoviricetes			Arquatrovirinae	Camvirus	NA	Camvirus alsaber	Streptomyces phage Alsaber			CG	dsDNA
GCA_002957325.1_Lenus	Duplodnaviria	Heunggongvirae	Uroviricota	Caudoviricetes			Tybeckvirinae	Lenusvirus	NA	Lenusvirus lenus	Lactobacillus phage Lenus			CG	dsDNA
GCA_002957415.1_ASM295741v1	Duplodnaviria	Heunggongvirae	Uroviricota	Caudoviricetes		Straboviridae		Cinqassovirus	NA	Cinqassovirus ah1	Aeromonas phage ah1			CG	dsDNA
GCA_002957435.1_ASM295743v1	Duplodnaviria	Heunggongvirae	Uroviricota	Caudoviricetes			Beephvirinae	Manuelvirus	NA	Manuelvirus wrighton	Streptomyces phage WRightOn			CG	dsDNA
GCA_002957445.1_ASM295744v1	Duplodnaviria	Heunggongvirae	Uroviricota	Caudoviricetes			Beephvirinae	Manuelvirus	NA	Manuelvirus manuel	Streptomyces phage Manuel			CG	dsDNA
GCA_002957455.1_ASM295745v1	Duplodnaviria	Heunggongvirae	Uroviricota	Caudoviricetes			Beephvirinae	Immanueltrevirus	NA	Immanueltrevirus immanuel3	Streptomyces phage Immanuel3			CG	dsDNA
GCA_002957515.2_ASM295751v2	Duplodnaviria	Heunggongvirae	Uroviricota	Caudoviricetes				Knuthellervirus	NA	Knuthellervirus PMBT14	Pseudomonas phage PMBT14			CG	dsDNA
GCA_002957525.1_ASM295752v1	Duplodnaviria	Heunggongvirae	Uroviricota	Caudoviricetes				Maxrubnervirus	NA	Pseudomonas virus PMBT3	Pseudomonas phage PMBT3			CG	dsDNA
GCA_002957545.1_ASM295754v1	Duplodnaviria	Heunggongvirae	Uroviricota	Caudoviricetes		Autographiviridae	Colwellvirinae	Trungvirus	NA	Trungvirus VEN	Vibrio phage VEN			CG	dsDNA
GCA_002957555.1_ASM295755v1	Duplodnaviria	Heunggongvirae	Uroviricota	Caudoviricetes				Abbeymikolonvirus	NA	Abbeymikolonvirus abbeymikolon	Streptomyces phage AbbeyMikolon			CG	dsDNA
GCA_002957565.1_ASM295756v1	Duplodnaviria	Heunggongvirae	Uroviricota	Caudoviricetes				Attoomivirus	NA	Attoomivirus attoomi	Streptomyces phage Attoomi			CG	dsDNA
GCA_002957575.1_ASM295757v1	Duplodnaviria	Heunggongvirae	Uroviricota	Caudoviricetes			Arquatrovirinae	Omarvirus	NA	Omarvirus omar	Streptomyces phage Omar			CG	dsDNA
GCA_002957585.1_ASM295758v1	Duplodnaviria	Heunggongvirae	Uroviricota	Caudoviricetes				Rowavirus	NA	Streptomyces virus Rowa	Streptomyces phage Rowa			CG	dsDNA
GCA_002957645.1_ASM295764v1	Duplodnaviria	Heunggongvirae	Uroviricota	Caudoviricetes		Demerecviridae	Ermolyevavirinae	Cetovirus	NA	Cetovirus ceto	Vibrio phage Ceto			CG	dsDNA
GCA_002957655.1_Vibriophage_Thalassa	Duplodnaviria	Heunggongvirae	Uroviricota	Caudoviricetes		Demerecviridae	Ermolyevavirinae	Thalassavirus	NA	Thalassavirus thalassa	Vibrio phage Thalassa			CG	dsDNA
GCA_002957745.1_ASM295774v1	Duplodnaviria	Heunggongvirae	Uroviricota	Caudoviricetes				Agricanvirus	NA	Agricanvirus desertfox	Erwinia phage vB_EamM_Desertfox			CG	dsDNA
GCA_002957915.1_ASM295791v1	Duplodnaviria	Heunggongvirae	Uroviricota	Caudoviricetes				Dismasvirus	NA	Dismasvirus dismas	Microbacterium phage Dismas			CG	dsDNA
GCA_002957925.1_ASM295792v1	Duplodnaviria	Heunggongvirae	Uroviricota	Caudoviricetes		Straboviridae		Bragavirus	NA	Bragavirus p43	Proteus phage phiP4-3			CG	dsDNA
GCA_002958005.1_ASM295800v1	Duplodnaviria	Heunggongvirae	Uroviricota	Caudoviricetes				Marfavirus	NA	Marfavirus F48	Klebsiella phage vB_Kpn_F48			CG	dsDNA
GCA_002958015.1_ASM295801v1	Duplodnaviria	Heunggongvirae	Uroviricota	Caudoviricetes			Gorgonvirinae	Aphroditevirus	NA	Aphroditevirus aphrodite1	Vibrio phage Aphrodite1			CG	dsDNA
GCA_002958055.1_ASM295805v1	Duplodnaviria	Heunggongvirae	Uroviricota	Caudoviricetes				Brigitvirus	NA	Brigitvirus brigit	Faecalibacterium phage FP_Brigit			CG	dsDNA
GCA_002958065.1_ASM295806v1	Duplodnaviria	Heunggongvirae	Uroviricota	Caudoviricetes				Eponavirus	NA	Eponavirus epona	Faecalibacterium phage FP_Epona			CG	dsDNA
GCA_002958075.1_ASM295807v1	Duplodnaviria	Heunggongvirae	Uroviricota	Caudoviricetes				Lagaffevirus	NA	Lagaffevirus lagaffe	Faecalibacterium phage FP_Lagaffe			CG	dsDNA
GCA_002958085.1_ASM295808v1	Duplodnaviria	Heunggongvirae	Uroviricota	Caudoviricetes				Lughvirus	NA	Faecalibacterium virus Lugh	Faecalibacterium phage FP_Lugh			CG	dsDNA
GCA_002958095.1_ASM295809v1	Duplodnaviria	Heunggongvirae	Uroviricota	Caudoviricetes				Mushuvirus	NA	Mushuvirus mushu	Faecalibacterium phage FP_Mushu			CG	dsDNA
GCA_002958105.1_ASM295810v1	Duplodnaviria	Heunggongvirae	Uroviricota	Caudoviricetes				Taranisvirus	NA	Taranisvirus taranis	Faecalibacterium phage FP_Taranis			CG	dsDNA
GCA_002958115.1_ASM295811v1	Duplodnaviria	Heunggongvirae	Uroviricota	Caudoviricetes				Toutatisvirus	NA	Toutatisvirus toutatis	Faecalibacterium phage FP_Toutatis			CG	dsDNA
GCA_002958125.1_ASM295812v1	Duplodnaviria	Heunggongvirae	Uroviricota	Caudoviricetes				Oengusvirus	NA	Faecalibacterium virus Oengus	Faecalibacterium phage FP_Oengus			CG	dsDNA
GCA_002958145.1_ASM295814v1	Duplodnaviria	Heunggongvirae	Uroviricota	Caudoviricetes			Gochnauervirinae	Dragolirvirus	NA	Dragolirvirus dragolir	Paenibacillus phage Dragolir			CG	dsDNA
GCA_002958225.1_ASM295822v1	Duplodnaviria	Heunggongvirae	Uroviricota	Caudoviricetes		Autographiviridae	Molineuxvirinae	Eracentumvirus	NA	Eracentumvirus S2	Erwinia phage vB_EamP-S2			CG	dsDNA
GCA_002958235.1_ASM295823v1	Duplodnaviria	Heunggongvirae	Uroviricota	Caudoviricetes			Tybeckvirinae	Maenadvirus	NA	Maenadvirus satyr	Lactobacillus phage Satyr			CG	dsDNA
GCA_002958285.1_ASM295828v1	Duplodnaviria	Heunggongvirae	Uroviricota	Caudoviricetes			Gutmannvirinae	Carmenvirus	NA	Carmenvirus carmen17	Bacillus phage Carmen17			CG	dsDNA
GCA_002958325.1_ASM295832v1	Duplodnaviria	Heunggongvirae	Uroviricota	Caudoviricetes				Sagamiharavirus	NA	Sagamiharavirus PP	Mycobacterium phage PP			CG	dsDNA
GCA_002958335.1_ASM295833v1	Duplodnaviria	Heunggongvirae	Uroviricota	Caudoviricetes			Chebruvirinae	Brujitavirus	NA	Brujitavirus HC	Mycobacterium phage HC			CG	dsDNA
GCA_002958395.1_ASM295839v1	Duplodnaviria	Heunggongvirae	Uroviricota	Caudoviricetes				Montyvirus	NA	Gordonia virus Flakey	Gordonia phage Flakey			CG	dsDNA
GCA_002958445.1_ASM295844v1	Duplodnaviria	Heunggongvirae	Uroviricota	Caudoviricetes				Trigintaduovirus	NA	Trigintaduovirus rem711	Mycobacterium phage Rem711			CG	dsDNA
GCA_002958465.1_ASM295846v1	Duplodnaviria	Heunggongvirae	Uroviricota	Caudoviricetes				Bjornvirus	NA	Bjornvirus bjorn	Pseudomonas phage Bjorn			CG	dsDNA
GCA_002958475.1_ASM295847v1	Duplodnaviria	Heunggongvirae	Uroviricota	Caudoviricetes		Schitoviridae		Littlefixvirus	NA	Littlefixvirus littlefix	Pseudomonas phage Littlefix			CG	dsDNA
GCA_002958485.1_ASM295848v1	Duplodnaviria	Heunggongvirae	Uroviricota	Caudoviricetes		Autographiviridae		Pollyceevirus	NA	Pollyceevirus pollyC	Pseudomonas phage PollyC			CG	dsDNA
GCA_002958695.1_ASM295869v1	Duplodnaviria	Heunggongvirae	Uroviricota	Caudoviricetes				Montyvirus	NA	Gordonia virus Adgers	Gordonia phage Adgers			CG	dsDNA
GCA_002958715.1_ASM295871v1	Duplodnaviria	Heunggongvirae	Uroviricota	Caudoviricetes		Zierdtviridae	Petrovskivirinae	Gruunavirus	NA	Gruunavirus flapper	Gordonia phage Flapper			CG	dsDNA
GCA_002958745.1_ASM295874v1	Duplodnaviria	Heunggongvirae	Uroviricota	Caudoviricetes				Cukevirus	NA	Cukevirus cuke	Mycobacterium phage Cuke			CG	dsDNA
GCA_002958855.1_ASM295885v1	Duplodnaviria	Heunggongvirae	Uroviricota	Caudoviricetes				Bingvirus	NA	Bingvirus bing	Streptomyces phage Bing			CG	dsDNA
GCA_002958875.2_ASM295887v2	Duplodnaviria	Heunggongvirae	Uroviricota	Caudoviricetes		Herelleviridae		Harbinvirus	NA	Harbinvirus bacchae	Lactobacillus phage Bacchae			CG	dsDNA
GCA_002958895.1_Nyseid	Duplodnaviria	Heunggongvirae	Uroviricota	Caudoviricetes			Tybeckvirinae	Lenusvirus	NA	Lenusvirus nyseid	Lactobacillus phage Nyseid			CG	dsDNA
GCA_002958925.1_ASM295892v1	Duplodnaviria	Heunggongvirae	Uroviricota	Caudoviricetes				Vicosavirus	NA	Vicosavirus NV1	Pseudomonas phage NV1			CG	dsDNA
GCA_002958945.1_ASM295894v1	Duplodnaviria	Heunggongvirae	Uroviricota	Caudoviricetes				Vividuovirus	NA	Gordonia virus Brandonk123	Gordonia phage Brandonk123			CG	dsDNA
GCA_002959055.1_ASM295905v1	Duplodnaviria	Heunggongvirae	Uroviricota	Caudoviricetes				Elerivirus	NA	Elerivirus eleri	Microbacterium phage Eleri			CG	dsDNA
GCA_002959075.1_ASM295907v1	Duplodnaviria	Heunggongvirae	Uroviricota	Caudoviricetes				Ilzatvirus	NA	Ilzatvirus hamlet	Microbacterium phage Hamlet			CG	dsDNA
GCA_002959085.1_ASM295908v1	Duplodnaviria	Heunggongvirae	Uroviricota	Caudoviricetes				Ilzatvirus	NA	Ilzatvirus ilzat	Microbacterium phage Ilzat			CG	dsDNA
GCA_002986005.1_ASM298600v1	Duplodnaviria	Heunggongvirae	Uroviricota	Caudoviricetes			Eucampyvirinae	Fletchervirus	NA	Fletchervirus CP81	Campylobacter phage CP81			CG	dsDNA
GCA_002987395.1_ASM298739v1	Duplodnaviria	Heunggongvirae	Uroviricota	Caudoviricetes				Pakpunavirus	NA	Pakpunavirus CAb02	Pseudomonas phage vB_PaeM_C2-10_Ab02			CG	dsDNA
GCA_002988105.1_ASM298810v1	Duplodnaviria	Heunggongvirae	Uroviricota	Caudoviricetes		Salasmaviridae		Cepunavirus	NA	Cepunavirus Cp7	Streptococcus phage Cp-7			CG	dsDNA
GCA_002988115.1_ASM298811v1	Duplodnaviria	Heunggongvirae	Uroviricota	Caudoviricetes		Mesyanzhinovviridae	Bradleyvirinae	Abidjanvirus	NA	Pseudomonas virus Ab19	Pseudomonas phage vB_PaeS_PAO1_Ab19			CG	dsDNA
GCA_002989895.1_ASM298989v1	Duplodnaviria	Heunggongvirae	Uroviricota	Caudoviricetes		Schitoviridae		Cbunavirus	NA	Cbunavirus CB1	Pectobacterium phage vB_PatP_CB1			CG	dsDNA
GCA_002989955.1_ASM298995v1	Duplodnaviria	Heunggongvirae	Uroviricota	Caudoviricetes		Schitoviridae		Cbunavirus	NA	Cbunavirus CB4	Pectobacterium phage vB_PatP_CB4			CG	dsDNA
GCA_002990115.1_ASM299011v1	Duplodnaviria	Heunggongvirae	Uroviricota	Caudoviricetes				Kryptosalinivirus	NA	Salinibacter virus M8CC19	Salinibacter phage M8CC-19			CG	dsDNA
GCA_002990125.1_ASM299012v1	Duplodnaviria	Heunggongvirae	Uroviricota	Caudoviricetes				Holosalinivirus	NA	Holosalinivirus M8CR302	Salinibacter phage M8CR30-2			CG	dsDNA
GCA_002990175.1_ASM299017v1	Duplodnaviria	Heunggongvirae	Uroviricota	Caudoviricetes		Autographiviridae	Okabevirinae	Higashivirus	NA	Higashivirus RsoP1IDN	Ralstonia phage RsoP1IDN			CG	dsDNA
GCA_002990195.1_Maenad	Duplodnaviria	Heunggongvirae	Uroviricota	Caudoviricetes			Tybeckvirinae	Maenadvirus	NA	Maenadvirus maenad	Lactobacillus phage Maenad			CG	dsDNA
GCA_002990235.1_ASM299023v1	Duplodnaviria	Heunggongvirae	Uroviricota	Caudoviricetes		Ackermannviridae		Taipeivirus	NA	Taipeivirus KpS110	Klebsiella virus vB_KpnM_KpS110			CG	dsDNA
GCA_002990265.1_ASM299026v1	Duplodnaviria	Heunggongvirae	Uroviricota	Caudoviricetes		Autographiviridae	Krylovirinae	Kirikabuvirus	NA	Kirikabuvirus NV3	Pseudomonas phage phiNV3			CG	dsDNA
GCA_002990485.1_ASM299048v1	Duplodnaviria	Heunggongvirae	Uroviricota	Caudoviricetes				Eneladusvirus	NA	Eneladusvirus Yen904	Yersinia phage fHe-Yen9-04			CG	dsDNA
GCA_002990725.1_ASM299072v1	Duplodnaviria	Heunggongvirae	Uroviricota	Caudoviricetes		Autographiviridae	Studiervirinae	Helsettvirus	NA	Helsettvirus fPS59	Yersinia phage fPS-59			CG	dsDNA
GCA_002990765.1_ASM299076v1	Duplodnaviria	Heunggongvirae	Uroviricota	Caudoviricetes		Autographiviridae	Studiervirinae	Helsettvirus	NA	Helsettvirus fPS53	Yersinia phage fPS-53			CG	dsDNA
GCA_002990805.1_ASM299080v1	Duplodnaviria	Heunggongvirae	Uroviricota	Caudoviricetes		Autographiviridae	Studiervirinae	Helsettvirus	NA	Helsettvirus fPS54ocr	Yersinia phage fPS-54-ocr			CG	dsDNA
GCA_002997375.2_ASM299737v2	Duplodnaviria	Heunggongvirae	Uroviricota	Caudoviricetes		Autographiviridae	Melnykvirinae	Panjvirus	NA	Panjvirus Spp16	Salmonella phage vB_SpuP_Spp16			CG	dsDNA
GCA_002997455.1_ASM299745v1	Duplodnaviria	Heunggongvirae	Uroviricota	Caudoviricetes		Schitoviridae	Enquatrovirinae	Kaypoctavirus	NA	Gamaleyavirus Sb1	Klebsiella phage KP8			CG	dsDNA
GCA_002997555.1_ASM299755v1	Duplodnaviria	Heunggongvirae	Uroviricota	Caudoviricetes				Kojivirus	NA	Kojivirus golden	Microbacterium phage Golden			CG	dsDNA
GCA_002997575.1_ASM299757v1	Duplodnaviria	Heunggongvirae	Uroviricota	Caudoviricetes				Kojivirus	NA	Kojivirus koji	Microbacterium phage Koji			CG	dsDNA
GCA_002997615.1_ASM299761v1	Duplodnaviria	Heunggongvirae	Uroviricota	Caudoviricetes				Bernalvirus	NA	Bernalvirus mendokysei	Mycobacterium phage Mendokysei			CG	dsDNA
GCA_002997715.1_ASM299771v1	Duplodnaviria	Heunggongvirae	Uroviricota	Caudoviricetes				Pikminvirus	NA	Microbacterium virus Pikmin	Microbacterium phage Pikmin			CG	dsDNA
GCA_002997835.1_ASM299783v1	Duplodnaviria	Heunggongvirae	Uroviricota	Caudoviricetes				Vidquintavirus	NA	Pantoea virus Vid5	Pantoea phage vB_PagS_Vid5			CG	dsDNA
GCA_002997855.1_ASM299785v1	Varidnaviria	Bamfordvirae	Preplasmiviricota	Tectiliviricetes	Vinavirales	Corticoviridae		Corticovirus	NA	Pseudoalteromonas virus Cr39582	Pseudoalteromonas phage Cr39582	Cr39582		CG	dsDNA
GCA_003004815.1_ASM300481v1	Duplodnaviria	Heunggongvirae	Uroviricota	Caudoviricetes				Ikedavirus	NA	Ikedavirus phi673	Corynebacterium phage phi673			CG	dsDNA
GCA_003004825.1_ASM300482v1	Duplodnaviria	Heunggongvirae	Uroviricota	Caudoviricetes				Ikedavirus	NA	Ikedavirus phi674	Corynebacterium phage phi674			CG	dsDNA
GCA_003004875.1_ASM300487v1	Duplodnaviria	Heunggongvirae	Uroviricota	Caudoviricetes		Straboviridae	Tevenvirinae	Kagamiyamavirus	NA	Kagamiyamavirus ecs1	Escherichia phage EcS1			CG	dsDNA
GCA_003013875.1_ASM301387v1	Duplodnaviria	Heunggongvirae	Uroviricota	Caudoviricetes		Drexlerviridae		Eclunavirus	NA	Eclunavirus EcL1	Enterobacter phage Ec_L1			CG	dsDNA
GCA_003013925.1_ASM301392v1	Duplodnaviria	Heunggongvirae	Uroviricota	Caudoviricetes			Gracegardnervirinae	Moomoovirus	NA	Moomoovirus moomoo	Mycobacterium phage MooMoo			CG	dsDNA
GCA_003013965.1_ASM301396v1	Duplodnaviria	Heunggongvirae	Uroviricota	Caudoviricetes			Weiservirinae	Anayavirus	NA	Anayavirus adonis	Mycobacterium phage Adonis			CG	dsDNA
GCA_003013975.1_ASM301397v1	Duplodnaviria	Heunggongvirae	Uroviricota	Caudoviricetes				Soupsvirus	NA	Gordonia virus Wait	Gordonia phage Wait			CG	dsDNA
GCA_003014035.1_ASM301403v1	Duplodnaviria	Heunggongvirae	Uroviricota	Caudoviricetes			Arquatrovirinae	Arequatrovirus	NA	Arequatrovirus paedore	Streptomyces phage Paedore			CG	dsDNA
GCA_003014165.1_ASM301416v1	Duplodnaviria	Heunggongvirae	Uroviricota	Caudoviricetes				Tandoganvirus	NA	Anoxybacillus virus A403	Anoxybacillus phage A403			CG	dsDNA
GCA_003014175.1_ASM301417v1	Duplodnaviria	Heunggongvirae	Uroviricota	Caudoviricetes		Ackermannviridae		Nezavisimistyvirus	NA	Nezavisimistyvirus bue1	Erwinia phage vB_EamM-Bue1			CG	dsDNA
GCA_003014195.2_ASM301419v2	Duplodnaviria	Heunggongvirae	Uroviricota	Caudoviricetes		Schitoviridae		Riverridervirus	NA	Riverridervirus riverrider	Xanthomonas phage RiverRider			CG	dsDNA
GCA_003014285.1_ASM301428v1	Duplodnaviria	Heunggongvirae	Uroviricota	Caudoviricetes				Finchvirus	NA	Finchvirus finch	Rhodococcus phage Finch			CG	dsDNA
GCA_003014395.1_ASM301439v1	Duplodnaviria	Heunggongvirae	Uroviricota	Caudoviricetes				Sukhumvitvirus	NA	Lactobacillus virus T25	Lactobacillus phage T25			CG	dsDNA
GCA_003014935.1_ASM301493v1	Duplodnaviria	Heunggongvirae	Uroviricota	Caudoviricetes				Buchananvirus	NA	Buchananvirus Sa179lw	Escherichia phage vB_EcoS Sa179lw			CG	dsDNA
GCA_003023905.1_ASM302390v1	Duplodnaviria	Heunggongvirae	Uroviricota	Caudoviricetes		Peduoviridae		Aresaunavirus	NA	Aresaunavirus RsoM1USA	Ralstonia phage RsoM1USA			CG	dsDNA
GCA_003023925.1_ASM302392v1	Duplodnaviria	Heunggongvirae	Uroviricota	Caudoviricetes		Herelleviridae	Twortvirinae	Baoshanvirus	NA	Baoshanvirus BS1	Staphylococcus virus phiSA_BS1	phiSA_BS1		CG	dsDNA
GCA_003031025.1_ASM303102v1	Duplodnaviria	Heunggongvirae	Uroviricota	Caudoviricetes		Autographiviridae		Gyeongsanvirus	NA	Gyeongsanvirus RsoP1EGY	Ralstonia phage RsoP1EGY			CG	dsDNA
GCA_003034585.1_ASM303458v1	Duplodnaviria	Heunggongvirae	Uroviricota	Caudoviricetes		Straboviridae	Tevenvirinae	Karamvirus	NA	Karamvirus mypsh1140	Enterobacter phage myPSH1140			CG	dsDNA
GCA_003034595.1_ASM303459v1	Duplodnaviria	Heunggongvirae	Uroviricota	Caudoviricetes		Herelleviridae	Twortvirinae	Baoshanvirus	NA	Baoshanvirus BS2	Staphylococcus virus phiSA_BS2	phiSA_BS2		CG	dsDNA
GCA_003034835.2_ASM303483v2	Duplodnaviria	Heunggongvirae	Uroviricota	Caudoviricetes		Ackermannviridae	Aglimvirinae	Agtrevirus	NA	Agtrevirus EM4	Enterobacter phage phiEM4			CG	dsDNA
GCA_003044095.1_ASM304409v1	Duplodnaviria	Heunggongvirae	Uroviricota	Caudoviricetes		Demerecviridae		Shenzhenvirus	NA	Shenzhenvirus AhSzq1	Aeromonas phage AhSzq-1			Partial genome	dsDNA
GCA_003044105.1_ASM304410v1	Duplodnaviria	Heunggongvirae	Uroviricota	Caudoviricetes		Demerecviridae		Shenzhenvirus	NA	Shenzhenvirus AhSzw1	Aeromonas phage AhSzw-1			CG	dsDNA
GCA_003047795.1_ASM304779v1	Duplodnaviria	Heunggongvirae	Uroviricota	Caudoviricetes				Beceayunavirus	NA	Beceayunavirus BceA1	Bacillus phage BceA1			CG	dsDNA
GCA_003047835.1_ASM304783v1	Duplodnaviria	Heunggongvirae	Uroviricota	Caudoviricetes		Autographiviridae	Melnykvirinae	Pienvirus	NA	Pienvirus R801	Yersinia phage phiR8-01			CG	dsDNA
GCA_003093875.1_ASM309387v1	Duplodnaviria	Heunggongvirae	Uroviricota	Caudoviricetes		Kyanoviridae		Shandvirus	NA	Shandvirus sb64	Synechococcus phage S-B64			CG	dsDNA
GCA_003093935.2_ASM309393v2	Duplodnaviria	Heunggongvirae	Uroviricota	Caudoviricetes		Straboviridae	Tevenvirinae	Roskildevirus	NA	Roskildevirus cronus	Erwinia phage Cronus			CG	dsDNA
GCA_003093975.1_ASM309397v1	Duplodnaviria	Heunggongvirae	Uroviricota	Caudoviricetes		Autographiviridae	Colwellvirinae	Uliginvirus	NA	Uliginvirus nerthus	Pseudomonas phage Nerthus			CG	dsDNA
GCA_003093995.1_ASM309399v1	Duplodnaviria	Heunggongvirae	Uroviricota	Caudoviricetes		Autographiviridae	Colwellvirinae	Uliginvirus	NA	Uliginvirus achelous	Pseudomonas phage Achelous			CG	dsDNA
GCA_003094015.1_ASM309401v1	Duplodnaviria	Heunggongvirae	Uroviricota	Caudoviricetes		Autographiviridae	Colwellvirinae	Uliginvirus	NA	Uliginvirus alpheus	Pseudomonas phage Alpheus			CG	dsDNA
GCA_003094055.1_ASM309405v1	Duplodnaviria	Heunggongvirae	Uroviricota	Caudoviricetes				Kelquatrovirus	NA	Kelquatrovirus KL4	Burkholderia phage vB_BmuP_KL4			CG	dsDNA
GCA_003094215.1_ASM309421v1	Duplodnaviria	Heunggongvirae	Uroviricota	Caudoviricetes		Drexlerviridae	Tunavirinae	Badaguanvirus	NA	Badaguanvirus IME347	Escherichia phage vB_EcoS_IME347			CG	dsDNA
GCA_003094255.2_ASM309425v2	Duplodnaviria	Heunggongvirae	Uroviricota	Caudoviricetes		Autographiviridae	Studiervirinae	Aarhusvirus	NA	Aarhusvirus dagda	Dickeya phage Dagda			CG	dsDNA
GCA_003094275.1_ASM309427v1	Duplodnaviria	Heunggongvirae	Uroviricota	Caudoviricetes				Carpasinavirus	NA	Carpasinavirus carpasina	Xanthomonas phage Carpasina			CG	dsDNA
GCA_003094295.1_ASM309429v1	Duplodnaviria	Heunggongvirae	Uroviricota	Caudoviricetes		Autographiviridae	Studiervirinae	Jarilovirus	NA	Jarilovirus jarilo	Pectobacterium phage Jarilo			CG	dsDNA
GCA_003094335.1_ASM309433v1	Duplodnaviria	Heunggongvirae	Uroviricota	Caudoviricetes		Autographiviridae	Studiervirinae	Ningirsuvirus	NA	Ningirsuvirus ninurta	Dickeya phage Ninurta			CG	dsDNA
GCA_003143035.1_ASM314303v1	Duplodnaviria	Heunggongvirae	Uroviricota	Caudoviricetes			Weiservirinae	Anayavirus	NA	Anayavirus alishaPH	Mycobacterium phage AlishaPH			CG	dsDNA
GCA_003143175.1_ASM314317v1	Duplodnaviria	Heunggongvirae	Uroviricota	Caudoviricetes			Gracegardnervirinae	Thetabobvirus	NA	Mycobacterium virus Tchen	Mycobacterium phage Tchen			CG	dsDNA
GCA_003143315.1_ASM314331v1	Duplodnaviria	Heunggongvirae	Uroviricota	Caudoviricetes				Efquatrovirus	NA	Efquatrovirus AL3	Enterococcus phage vB_EfaS_AL3			CG	dsDNA
GCA_003143335.1_ASM314333v1	Duplodnaviria	Heunggongvirae	Uroviricota	Caudoviricetes				Efquatrovirus	NA	Efquatrovirus AL2	Enterococcus phage vB_EfaS_AL2			CG	dsDNA
GCA_003143375.2_ASM314337v2	Duplodnaviria	Heunggongvirae	Uroviricota	Caudoviricetes		Autographiviridae	Melnykvirinae	Aerosvirus	NA	Aerosvirus av25AhydR2PP	Aeromonas phage 25AhydR2PP			CG	dsDNA
GCA_003146805.1_ASM314680v1	Duplodnaviria	Heunggongvirae	Uroviricota	Caudoviricetes				Punavirus	NA	Punavirus RCS47	Escherichia phage RCS47			CG	dsDNA
GCA_003181195.1_ASM318119v1	Duplodnaviria	Heunggongvirae	Uroviricota	Caudoviricetes		Autographiviridae	Corkvirinae	Phimunavirus	NA	Phimunavirus CB5	Pectobacterium phage vB_PatP_CB5			CG	dsDNA
GCA_003182865.1_ASM318286v1	Duplodnaviria	Heunggongvirae	Uroviricota	Caudoviricetes			Pclasvirinae	Xaviavirus	NA	Xaviavirus xavia	Mycobacterium phage Xavia			CG	dsDNA
GCA_003182885.1_ASM318288v1	Duplodnaviria	Heunggongvirae	Uroviricota	Caudoviricetes				Appavirus	NA	Appavirus appa	Microbacterium phage Appa			CG	dsDNA
GCA_003182965.1_ASM318296v1	Duplodnaviria	Heunggongvirae	Uroviricota	Caudoviricetes				Squashvirus	NA	Microbacterium virus Hyperion	Microbacterium phage Hyperion			CG	dsDNA
GCA_003182985.1_ASM318298v1	Duplodnaviria	Heunggongvirae	Uroviricota	Caudoviricetes				Jacevirus	NA	Jacevirus jace	Gordonia phage Jace			CG	dsDNA
GCA_003183085.1_ASM318308v1	Duplodnaviria	Heunggongvirae	Uroviricota	Caudoviricetes				Sourvirus	NA	Gordonia virus Sour	Gordonia phage Sour			CG	dsDNA
GCA_003183145.1_ASM318314v1	Duplodnaviria	Heunggongvirae	Uroviricota	Caudoviricetes				Squashvirus	NA	Microbacterium virus Squash	Microbacterium phage Squash			CG	dsDNA
GCA_003183245.1_ASM318324v1	Duplodnaviria	Heunggongvirae	Uroviricota	Caudoviricetes			Beephvirinae	Flowerpowervirus	NA	Flowerpowervirus flowerpower	Streptomyces phage FlowerPower			CG	dsDNA
GCA_003183345.1_ASM318334v1	Duplodnaviria	Heunggongvirae	Uroviricota	Caudoviricetes				Quhwahvirus	NA	Microbacterium phage Paschalis	Microbacterium phage Paschalis			CG	dsDNA
GCA_003183625.1_ASM318362v1	Duplodnaviria	Heunggongvirae	Uroviricota	Caudoviricetes				Rogerhendrixvirus	NA	Microbacterium virus Hendrix	Microbacterium phage Hendrix			CG	dsDNA
GCA_003183745.1_ASM318374v1	Duplodnaviria	Heunggongvirae	Uroviricota	Caudoviricetes		Chaseviridae	Cleopatravirinae	Faunusvirus	NA	Faunusvirus faunus	Erwinia phage Faunus			CG	dsDNA
GCA_003226615.1_ASM322661v1	Duplodnaviria	Heunggongvirae	Uroviricota	Caudoviricetes		Casjensviridae		Phobosvirus	NA	Phobosvirus PspYZU01	Pseudomonas phage PspYZU01			CG	dsDNA
GCA_003226635.1_ASM322663v1	Duplodnaviria	Heunggongvirae	Uroviricota	Caudoviricetes		Straboviridae		Jiangsuvirus	NA	Jiangsuvirus pspyzu05	Pseudomonas phage PspYZU05			CG	dsDNA
GCA_003226655.1_ASM322665v1	Duplodnaviria	Heunggongvirae	Uroviricota	Caudoviricetes		Autographiviridae	Studiervirinae	Pijolavirus	NA	Pijolavirus PspYZU08	Pseudomonas phage PspYZU08			CG	dsDNA
GCA_003288515.1_ASM328851v1	Duplodnaviria	Heunggongvirae	Uroviricota	Caudoviricetes		Autographiviridae		Stompelvirus	NA	Stompelvirus RPSC1	Ralstonia phage RPSC1			CG	dsDNA
GCA_003288535.1_ASM328853v1	Duplodnaviria	Heunggongvirae	Uroviricota	Caudoviricetes				Heilongjiangvirus	NA	Heilongjiangvirus Lb	Lactobacillus phage Lb			CG	dsDNA
GCA_003307335.2_ASM330733v2	Duplodnaviria	Heunggongvirae	Uroviricota	Caudoviricetes				Uwajimavirus	NA	Lactococcus virus PLgW1	Lactococcus phage PLgW-1			CG	dsDNA
GCA_003307815.1_ASM330781v1	Duplodnaviria	Heunggongvirae	Uroviricota	Caudoviricetes				Krampusvirus	NA	Microbacterium virus Krampus	Microbacterium phage Krampus			CG	dsDNA
GCA_003307855.1_ASM330785v1	Duplodnaviria	Heunggongvirae	Uroviricota	Caudoviricetes				Mementomorivirus	NA	Microbacterium virus MementoMori	Microbacterium phage MementoMori			CG	dsDNA
GCA_003307875.1_ASM330787v1	Duplodnaviria	Heunggongvirae	Uroviricota	Caudoviricetes				Metamorphoovirus	NA	Microbacterium virus Metamorphoo	Microbacterium phage Metamorphoo			CG	dsDNA
GCA_003308035.1_ASM330803v1	Duplodnaviria	Heunggongvirae	Uroviricota	Caudoviricetes				Metamorphoovirus	NA	Microbacterium virus RobsFeet	Microbacterium phage RobsFeet			CG	dsDNA
GCA_003308055.1_ASM330805v1	Duplodnaviria	Heunggongvirae	Uroviricota	Caudoviricetes				Terapinvirus	NA	Gordonia virus Suzy	Gordonia phage Suzy			CG	dsDNA
GCA_003308155.1_ASM330815v1	Duplodnaviria	Heunggongvirae	Uroviricota	Caudoviricetes				Trinevirus	NA	Gordonia virus Trine	Gordonia phage Trine			CG	dsDNA
GCA_003308195.1_ASM330819v1	Duplodnaviria	Heunggongvirae	Uroviricota	Caudoviricetes				Zetavirus	NA	Microbacterium virus Zeta1847	Microbacterium phage Zeta1847			CG	dsDNA
GCA_003308215.1_ASM330821v1	Duplodnaviria	Heunggongvirae	Uroviricota	Caudoviricetes				Quhwahvirus	NA	Microbacterium phage Quhwah	Microbacterium phage Quhwah			CG	dsDNA
GCA_003308495.1_ASM330849v1	Duplodnaviria	Heunggongvirae	Uroviricota	Caudoviricetes			Arquatrovirinae	Salutenavirus	NA	Yosifvirus yosif	Streptomyces phage Yosif			CG	dsDNA
GCA_003308555.1_ASM330855v1	Duplodnaviria	Heunggongvirae	Uroviricota	Caudoviricetes				Alexandravirus	NA	Alexandravirus alexandra	Erwinia phage vB_EamM_Alexandra			CG	dsDNA
GCA_003308615.1_ASM330861v1	Duplodnaviria	Heunggongvirae	Uroviricota	Caudoviricetes		Schitoviridae	Rhodovirinae	Aorunvirus	NA	Aorunvirus V12	Ruegeria phage vB_RpoP-V12			CG	dsDNA
GCA_003308735.1_ASM330873v1	Duplodnaviria	Heunggongvirae	Uroviricota	Caudoviricetes		Schitoviridae	Rhodovirinae	Pomeroyivirus	NA	Pomeroyivirus V13	Ruegeria phage vB_RpoP-V13			CG	dsDNA
GCA_003328645.1_ASM332864v1	Duplodnaviria	Heunggongvirae	Uroviricota	Caudoviricetes		Straboviridae	Emmerichvirinae	Ceceduovirus	NA	Ceceduovirus assw	Aeromonas phage AS-sw			PG	dsDNA
GCA_003328765.1_ASM332876v1	Duplodnaviria	Heunggongvirae	Uroviricota	Caudoviricetes		Straboviridae		Bragavirus	NA	Bragavirus pm2	Proteus phage PM2			CG	dsDNA
GCA_003328825.1_ASM332882v1	Duplodnaviria	Heunggongvirae	Uroviricota	Caudoviricetes		Herelleviridae	Bastillevirinae	Siophivirus	NA	Siophivirus SIOphi	Bacillus phage SIOphi			CCG	dsDNA
GCA_003329145.1_ASM332914v1	Duplodnaviria	Heunggongvirae	Uroviricota	Caudoviricetes		Schitoviridae	Rhodovirinae	Sanyabayvirus	NA	Sanyabayvirus DS1410Ws06	Dinoroseobacter phage DS-1410Ws-06			PG	dsDNA
GCA_003329205.1_ASM332920v1	Duplodnaviria	Heunggongvirae	Uroviricota	Caudoviricetes		Schitoviridae	Rhodovirinae	Aoqinvirus	NA	Aoqinvirus RD1410W101	Roseobacter phage RD-1410W1-01			PG	dsDNA
GCA_003329305.1_ASM332930v1	Duplodnaviria	Heunggongvirae	Uroviricota	Caudoviricetes				Kryptosalinivirus	NA	Salinibacter virus M8CRM1	Salinibacter phage M8CRM-1			Partial genome	dsDNA
GCA_003329345.1_ASM332934v1	Duplodnaviria	Heunggongvirae	Uroviricota	Caudoviricetes				Kairosalinivirus	NA	Kairosalinivirus M31CR412	Salinibacter phage M31CR41-2			Partial genome	dsDNA
GCA_003329365.1_ASM332936v1	Duplodnaviria	Heunggongvirae	Uroviricota	Caudoviricetes		Drexlerviridae		Webervirus	NA	Webervirus F20	Enterobacter phage F20			PG	dsDNA
GCA_003329385.1_ASM332938v1	Duplodnaviria	Heunggongvirae	Uroviricota	Caudoviricetes				Kairosalinivirus	NA	Kairosalinivirus SRUTV1	Salinibacter phage SRUTV-1			Partial genome	dsDNA
GCA_003329545.1_ASM332954v1	Duplodnaviria	Heunggongvirae	Uroviricota	Caudoviricetes				Hubeivirus	NA	Hubeivirus MY192	Bacillus phage vB_BceS-MY192			CG	dsDNA
GCA_003329705.1_ASM332970v1	Duplodnaviria	Heunggongvirae	Uroviricota	Caudoviricetes				Efquatrovirus	NA	Efquatrovirus AUEF3	Enterococcus phage AUEF3			Partial genome	dsDNA
GCA_003329945.1_ASM332994v1	Duplodnaviria	Heunggongvirae	Uroviricota	Caudoviricetes				Seongbukvirus	NA	Leuconostoc virus MH1	Leuconostoc phage phiMH1			CG	dsDNA
GCA_003329965.1_ASM332996v1	Duplodnaviria	Heunggongvirae	Uroviricota	Caudoviricetes				Beetrevirus	NA	Beetrevirus JBD67	Pseudomonas phage JBD67			CG	dsDNA
GCA_003330045.1_ASM333004v1	Duplodnaviria	Heunggongvirae	Uroviricota	Caudoviricetes				Holosalinivirus	NA	Holosalinivirus M1EM1	Salinibacter phage M1EM-1			partial genome	dsDNA
GCA_003341035.2_ASM334103v2	Duplodnaviria	Heunggongvirae	Uroviricota	Caudoviricetes		Autographiviridae	Studiervirinae	Foetvirus	NA	Foetvirus SRT7	Escherichia phage SRT7			CG	dsDNA
GCA_003341435.1_ASM334143v1	Duplodnaviria	Heunggongvirae	Uroviricota	Caudoviricetes		Schitoviridae		Shizishanvirus	NA	Shizishanvirus phCDa	Pseudomonas phage phCDa			CG	dsDNA
GCA_003344285.1_ASM334428v1	Duplodnaviria	Heunggongvirae	Uroviricota	Caudoviricetes		Schitoviridae	Pontosvirinae	Dorisvirus	NA	Dorisvirus 49B3	Vibrio phage 1.097.O._10N.286.49.B3			PG	dsDNA
GCA_003344325.1_ASM334432v1	Duplodnaviria	Heunggongvirae	Uroviricota	Caudoviricetes		Kyanoviridae		Thaumasvirus	NA	Thaumasvirus stim4	Cyanophage S-TIM4			CG	dsDNA
GCA_003344985.1_ASM334498v1	Duplodnaviria	Heunggongvirae	Uroviricota	Caudoviricetes				Wellingtonvirus	NA	Wellingtonvirus wellington	Erwinia phage Wellington			CG	dsDNA
GCA_003354205.1_ASM335420v1	Duplodnaviria	Heunggongvirae	Uroviricota	Caudoviricetes				Gervaisevirus	NA	Gervaisevirus GP4	Ralstonia phage GP4			CG	dsDNA
GCA_003364375.1_ASM336437v1	Duplodnaviria	Heunggongvirae	Uroviricota	Caudoviricetes		Guelinviridae		Brucesealvirus	NA	Brucesealvirus CPS2	Clostridium phage CPS2			CG	dsDNA
GCA_003365175.1_ASM336517v1	Duplodnaviria	Heunggongvirae	Uroviricota	Caudoviricetes			Weiservirinae	Aminayvirus	NA	Aminayvirus aminay	Mycobacterium phage Aminay			CG	dsDNA
GCA_003365275.1_ASM336527v1	Duplodnaviria	Heunggongvirae	Uroviricota	Caudoviricetes				Edenvirus	NA	Edenvirus eden	Microbacterium phage Eden			CG	dsDNA
GCA_003365615.1_ASM336561v1	Duplodnaviria	Heunggongvirae	Uroviricota	Caudoviricetes				Apricotvirus	NA	Apricotvirus apricot	Gordonia phage Apricot			CG	dsDNA
GCA_003365735.1_ASM336573v1	Duplodnaviria	Heunggongvirae	Uroviricota	Caudoviricetes				Jujuvirus	NA	Jujuvirus frokostdame	Gordonia phage Frokostdame			CG	dsDNA
GCA_003365895.1_ASM336589v1	Duplodnaviria	Heunggongvirae	Uroviricota	Caudoviricetes				Ruthyvirus	NA	Ruthyvirus ruthy	Gordonia phage Ruthy			CG	dsDNA
GCA_003366275.1_ASM336627v1	Duplodnaviria	Heunggongvirae	Uroviricota	Caudoviricetes		Zierdtviridae	Petrovskivirinae	Pleakleyvirus	NA	Pleakleyvirus pleakley	Gordonia phage Pleakley			CG	dsDNA
GCA_003366535.1_ASM336653v1	Duplodnaviria	Heunggongvirae	Uroviricota	Caudoviricetes		Vilmaviridae	Lclasvirinae	Bromdenvirus	NA	Bromdenvirus bromden	Mycobacterium phage Bromden			CG	dsDNA
GCA_003366875.1_ASM336687v1	Duplodnaviria	Heunggongvirae	Uroviricota	Caudoviricetes				Quhwahvirus	NA	Microbacterium phage KaiHaiDragon	Microbacterium phage KaiHaiDragon			CG	dsDNA
GCA_003366935.1_ASM336693v1	Duplodnaviria	Heunggongvirae	Uroviricota	Caudoviricetes				Daredevilvirus	NA	Daredevilvirus daredevil	Gordonia phage DareDevil			CG	dsDNA
GCA_003367035.1_ASM336703v1	Duplodnaviria	Heunggongvirae	Uroviricota	Caudoviricetes		Herelleviridae	Bastillevirinae	Jeonjuvirus	NA	Jeonjuvirus BSP38	Bacillus phage BSP38			CG	dsDNA
GCA_003367055.1_ASM336705v1	Duplodnaviria	Heunggongvirae	Uroviricota	Caudoviricetes				Lentavirus	NA	Eggerthella virus PMBT5	Eggerthella phage PMBT5			CG	dsDNA
GCA_003368625.1_ASM336862v1	Duplodnaviria	Heunggongvirae	Uroviricota	Caudoviricetes				Coatlandelriovirus	NA	Coatlandelriovirus RSP	Ralstonia phage phiRSP			CG	dsDNA
GCA_003368845.1_ASM336884v1	Duplodnaviria	Heunggongvirae	Uroviricota	Caudoviricetes			Gochnauervirinae	Wanderervirus	NA	Wanderervirus wanderer	Paenibacillus phage Wanderer			CG	dsDNA
GCA_003368945.1_ASM336894v1	Duplodnaviria	Heunggongvirae	Uroviricota	Caudoviricetes				Halcyonevirus	NA	Halcyonevirus C7Cdelta	Paenibacillus virus C7Cdelta			CG	dsDNA
GCA_003369185.1_ASM336918v1	Duplodnaviria	Heunggongvirae	Uroviricota	Caudoviricetes				Halcyonevirus	NA	Halcyonevirus scottie	Paenibacillus virus Scottie			CG	dsDNA
GCA_003369225.1_ASM336922v1	Duplodnaviria	Heunggongvirae	Uroviricota	Caudoviricetes				Halcyonevirus	NA	Halcyonevirus halcyone	Paenibacillus virus Halcyone			CG	dsDNA
GCA_003369305.1_ASM336930v1	Duplodnaviria	Heunggongvirae	Uroviricota	Caudoviricetes		Autographiviridae		Igirivirus	NA	Igirivirus STIP37	Synechococcus T7-like virus S-TIP37			CG	dsDNA
GCA_003423065.1_ASM342306v1	Duplodnaviria	Heunggongvirae	Uroviricota	Caudoviricetes				Nylescharonvirus	NA	Nylescharonvirus LE3	Leptospira phage LE3			CG	dsDNA
GCA_003423085.1_ASM342308v1	Duplodnaviria	Heunggongvirae	Uroviricota	Caudoviricetes				Nylescharonvirus	NA	Nylescharonvirus LE4	Leptospira phage LE4			CG	dsDNA
GCA_003423225.1_ASM342322v1	Duplodnaviria	Heunggongvirae	Uroviricota	Caudoviricetes			Bclasvirinae	Thonkovirus	NA	Thonkovirus thonko	Mycobacterium phage Thonko			CG	dsDNA
GCA_003423245.1_ASM342324v1	Duplodnaviria	Heunggongvirae	Uroviricota	Caudoviricetes				Ronaldovirus	NA	Gordonia virus Fryberger	Gordonia phage Fryberger			CG	dsDNA
GCA_003423265.1_ASM342326v1	Duplodnaviria	Heunggongvirae	Uroviricota	Caudoviricetes				Ronaldovirus	NA	Gordonia virus Ronaldo	Gordonia phage Ronaldo			CG	dsDNA
GCA_003423285.1_ASM342328v1	Duplodnaviria	Heunggongvirae	Uroviricota	Caudoviricetes		Autographiviridae		Scottvirus	NA	Scottvirus scott	Sphingomonas_phage_Scott			CG	dsDNA
GCA_003423425.1_ASM342342v1	Duplodnaviria	Heunggongvirae	Uroviricota	Caudoviricetes			Gutmannvirinae	Carmenvirus	NA	Carmenvirus Wes44	Bacillus phage Wes44			CG	dsDNA
GCA_003428315.1_ASM342831v1	Duplodnaviria	Heunggongvirae	Uroviricota	Caudoviricetes		Kyanoviridae		Makelovirus	NA	Makelovirus prm1	Synechococcus virus S-PRM1			CG	dsDNA
GCA_003440355.1_ASM344035v1	Duplodnaviria	Heunggongvirae	Uroviricota	Caudoviricetes		Autographiviridae		Jalkavirus	NA	Jalkavirus S08C159	uncultured phage_MedDCM-OCT-S08-C159			CG	dsDNA
GCA_003440755.1_ASM344075v1	Duplodnaviria	Heunggongvirae	Uroviricota	Caudoviricetes		Autographiviridae		Pekhitvirus	NA	Pekhitvirus S04C24	uncultured phage_MedDCM-OCT-S04-C24			CG	dsDNA
GCA_003440975.1_ASM344097v1	Duplodnaviria	Heunggongvirae	Uroviricota	Caudoviricetes		Autographiviridae		Podivirus	NA	Podivirus S05C243	uncultured phage_MedDCM-OCT-S05-C243			Partial genome	dsDNA
GCA_003441035.1_ASM344103v1	Duplodnaviria	Heunggongvirae	Uroviricota	Caudoviricetes		Autographiviridae		Pagavirus	NA	Pagavirus S05C849	uncultured phage_MedDCM-OCT-S05-C849			CG	dsDNA
GCA_003441135.1_ASM344113v1	Duplodnaviria	Heunggongvirae	Uroviricota	Caudoviricetes		Autographiviridae		Powvirus	NA	Powvirus S08C41	uncultured phage MedDCM-OCT-S08-C41			Partial genome	dsDNA
GCA_003441355.1_ASM344135v1	Duplodnaviria	Heunggongvirae	Uroviricota	Caudoviricetes		Autographiviridae		Maculvirus	NA	Maculvirus KF1	Vibrio phage vB_VpaP_KF1			CG	dsDNA
GCA_003441375.1_ASM344137v1	Duplodnaviria	Heunggongvirae	Uroviricota	Caudoviricetes		Autographiviridae		Maculvirus	NA	Maculvirus KF2	Vibrio phage vB_VpaP_KF2			CG	dsDNA
GCA_003441855.1_ASM344185v1	Duplodnaviria	Heunggongvirae	Uroviricota	Caudoviricetes		Ackermannviridae		Campanilevirus	NA	Campanilevirus YC	Vibrio phage YC			CG	dsDNA
GCA_003441895.1_ASM344189v1	Duplodnaviria	Heunggongvirae	Uroviricota	Caudoviricetes			Nclasvirinae	Charlievirus	NA	Charlievirus Aggie	Mycobacterium phage Aggie			CG	dsDNA
GCA_003441955.1_ASM344195v1	Duplodnaviria	Heunggongvirae	Uroviricota	Caudoviricetes			Ruthgordonvirinae	Catfishvirus	NA	Catfishvirus catfish	Gordonia phage Catfish			CG	dsDNA
GCA_003442115.1_ASM344211v1	Duplodnaviria	Heunggongvirae	Uroviricota	Caudoviricetes				Neferthenavirus	NA	Microbacterium virus Neferthena	Microbacterium phage Neferthena			CG	dsDNA
GCA_003442195.1_ASM344219v1	Duplodnaviria	Heunggongvirae	Uroviricota	Caudoviricetes				Leonardvirus	NA	Leonardvirus ali17	Gordonia phage Ali17			CG	dsDNA
GCA_003442275.1_ASM344227v1	Duplodnaviria	Heunggongvirae	Uroviricota	Caudoviricetes			Arquatrovirinae	Janusvirus	NA	Janusvirus hank144	Streptomyces phage Hank144			CG	dsDNA
GCA_003442335.1_ASM344233v1	Duplodnaviria	Heunggongvirae	Uroviricota	Caudoviricetes		Zierdtviridae	Petrovskivirinae	Sukkupivirus	NA	Sukkupivirus marietta	Gordonia phage Marietta			CG	dsDNA
GCA_003442455.1_1232x	Duplodnaviria	Heunggongvirae	Uroviricota	Caudoviricetes		Zierdtviridae	Petrovskivirinae	Skysandvirus	NA	Skysandvirus skysand	Gordonia phage Skysand			CG	dsDNA
GCA_003442555.1_ASM344255v1	Duplodnaviria	Heunggongvirae	Uroviricota	Caudoviricetes	Crassvirales	Steigviridae	Asinivirinae	Kehishuvirus	NA	Kehishuvirus primarius	Bacteroides phage crAss001			CG	dsDNA
GCA_003442615.1_ASM344261v1	Duplodnaviria	Heunggongvirae	Uroviricota	Caudoviricetes				Kroosvirus	NA	Kroosvirus ashertheman	Gordonia phage Ashertheman			CG	dsDNA
GCA_003442675.1_ASM344267v1	Duplodnaviria	Heunggongvirae	Uroviricota	Caudoviricetes			Weiservirinae	Kratiovirus	NA	Kratiovirus collard	Mycobacterium phage Collard			CG	dsDNA
GCA_003442775.1_ASM344277v1	Duplodnaviria	Heunggongvirae	Uroviricota	Caudoviricetes			Langleyhallvirinae	Horusvirus	NA	Horusvirus horus	Gordonia phage Horus			CG	dsDNA
GCA_003442955.1_ASM344295v1	Duplodnaviria	Heunggongvirae	Uroviricota	Caudoviricetes			Langleyhallvirinae	Phistoryvirus	NA	Phistoryvirus phistory	Gordonia phage Phistory			CG	dsDNA
GCA_003442995.1_ASM344299v1	Duplodnaviria	Heunggongvirae	Uroviricota	Caudoviricetes			Gracegardnervirinae	Thetabobvirus	NA	Mycobacterium virus Renaud18	Mycobacterium phage Renaud18			CG	dsDNA
GCA_003443035.1_ASM344303v1	Duplodnaviria	Heunggongvirae	Uroviricota	Caudoviricetes			Ruthgordonvirinae	Schmidtvirus	NA	Schmidtvirus schmidt	Gordonia phage Schmidt			CG	dsDNA
GCA_003443075.1_ASM344307v1	Duplodnaviria	Heunggongvirae	Uroviricota	Caudoviricetes		Demerecviridae		Pogseptimavirus	NA	Pogseptimavirus PG07	Vibrio phage vB_VpS_PG07			CG	dsDNA
GCA_003443255.1_ASM344325v1	Duplodnaviria	Heunggongvirae	Uroviricota	Caudoviricetes			Dolichocephalovirinae	Poindextervirus	NA	Poindextervirus BL10	Caulobacter phage CcrBL10			CG	dsDNA
GCA_003443275.1_ASM344327v1	Duplodnaviria	Heunggongvirae	Uroviricota	Caudoviricetes			Dolichocephalovirinae	Colossusvirus	NA	Colossusvirus PW	Caulobacter phage CcrPW			CG	dsDNA
GCA_003443295.1_ASM344329v1	Duplodnaviria	Heunggongvirae	Uroviricota	Caudoviricetes			Dolichocephalovirinae	Bertelyvirus	NA	Bertelyvirus BL9	Caulobacter phage CcrBL9			CG	dsDNA
GCA_003443315.2_ASM344331v2	Duplodnaviria	Heunggongvirae	Uroviricota	Caudoviricetes			Dolichocephalovirinae	Bertelyvirus	NA	Bertelyvirus SC	Caulobacter phage CcrSC			CG	dsDNA
GCA_003443495.1_ASM344349v1	Duplodnaviria	Heunggongvirae	Uroviricota	Caudoviricetes	Crassvirales	Steigviridae	Asinivirinae	Paundivirus	NA	Paundivirus hollandii	IAS virus			CG	dsDNA
GCA_003456955.1_ASM345695v1	Duplodnaviria	Heunggongvirae	Uroviricota	Caudoviricetes	Crassvirales	Intestiviridae	Crudevirinae	Whopevirus	NA	Whopevirus animalis	crAssphage sp. isolate ctbg_1			CG	dsDNA
GCA_003456995.1_ASM345699v1	Duplodnaviria	Heunggongvirae	Uroviricota	Caudoviricetes	Crassvirales	Intestiviridae	Obtuvirinae	Wotdevirus	NA	Wotdevirus murinus	crAssphage sp. isolate ctcc615			CG	dsDNA
GCA_003505395.1_ASM350539v1	Duplodnaviria	Heunggongvirae	Uroviricota	Caudoviricetes		Autographiviridae		Chosvirus	NA	Chosvirus KM23C739	uncultured phage_Deep1-GF2-KM23-C739			CG	dsDNA
GCA_003505615.1_ASM350561v1	Duplodnaviria	Heunggongvirae	Uroviricota	Caudoviricetes		Autographiviridae		Stupnyavirus	NA	Stupnyavirus KM16C193	uncultured phage_Deep-GF0-KM16-C193			Partial genome	dsDNA
GCA_003568435.1_ASM356843v1	Duplodnaviria	Heunggongvirae	Uroviricota	Caudoviricetes		Autographiviridae	Studiervirinae	Ningirsuvirus	NA	Ningirsuvirus JA10	Dickeya_phage_vB_DsoP_JA10			CG	dsDNA
GCA_003568475.1_ASM356847v1	Duplodnaviria	Heunggongvirae	Uroviricota	Caudoviricetes				Salmondvirus	NA	Salmondvirus JA29	Dickeya phage vB_DsoM_JA29			CG	dsDNA
GCA_003568515.1_ASM356851v1	Duplodnaviria	Heunggongvirae	Uroviricota	Caudoviricetes				Alexandravirus	NA	Alexandravirus AD1	Dickeya phage vB_DsoM_AD1			CG	dsDNA
GCA_003571865.1_ASM357186v1	Duplodnaviria	Heunggongvirae	Uroviricota	Caudoviricetes		Autographiviridae		Kalppathivirus	NA	Kalppathivirus P26059B	Curvibacter phage P26059B			CG	dsDNA
GCA_003575385.1_ASM357538v1	Duplodnaviria	Heunggongvirae	Uroviricota	Caudoviricetes		Autographiviridae	Studiervirinae	Aarhusvirus	NA	Aarhusvirus katbat	Dickeya_phage_Katbat			CG	dsDNA
GCA_003575425.1_ASM357542v1	Duplodnaviria	Heunggongvirae	Uroviricota	Caudoviricetes		Autographiviridae	Studiervirinae	Aarhusvirus	NA	Aarhusvirus luksen	Dickeya_phage_Luksen			CG	dsDNA
GCA_003575845.1_ASM357584v1	Duplodnaviria	Heunggongvirae	Uroviricota	Caudoviricetes		Guelinviridae		Susfortunavirus	NA	Susfortunavirus susfortuna	Clostridium phage susfortuna			CG	dsDNA
GCA_003597575.1_ASM359757v1	Duplodnaviria	Heunggongvirae	Uroviricota	Caudoviricetes		Peduoviridae		Canoevirus	NA	Canoevirus canoe	Vibrio phage 1.202.O._10N.222.45.E8			Partial genome	dsDNA
GCA_003600665.1_ASM360066v1	Duplodnaviria	Heunggongvirae	Uroviricota	Caudoviricetes				Hungariovirus	NA	Hungariovirus C1302	Escherichia phage C130_2			CG	dsDNA
GCA_003601095.1_ASM360109v1	Duplodnaviria	Heunggongvirae	Uroviricota	Caudoviricetes		Zierdtviridae	Petrovskivirinae	Foxborovirus	NA	Foxborovirus foxboro	Gordonia phage Foxboro			CG	dsDNA
GCA_003601255.1_ASM360125v1	Duplodnaviria	Heunggongvirae	Uroviricota	Caudoviricetes				Gillianvirus	NA	Gillianvirus oneinagillian	Microbacterium phage OneinaGillian			CG	dsDNA
GCA_003601335.1_ASM360133v1	Duplodnaviria	Heunggongvirae	Uroviricota	Caudoviricetes				Samwavirus	NA	Corynebacterium virus SamW	Corynebacterium phage SamW			CG	dsDNA
GCA_003601415.1_ASM360141v1	Duplodnaviria	Heunggongvirae	Uroviricota	Caudoviricetes				Juiceboxvirus	NA	Juiceboxvirus juicebox	Corynebacterium phage Juicebox			CG	dsDNA
GCA_003613135.1_ASM361313v1	Duplodnaviria	Heunggongvirae	Uroviricota	Caudoviricetes		Straboviridae	Tevenvirinae	Jiaodavirus	NA	Jiaodavirus kp179	Klebsiella phage KP179			CG	dsDNA
GCA_003613215.1_ASM361321v1	Duplodnaviria	Heunggongvirae	Uroviricota	Caudoviricetes				Raleighvirus	NA	Streptomyces virus Darolandstone	Streptomyces phage Darolandstone			CG	dsDNA
GCA_003613295.1_ASM361329v1	Duplodnaviria	Heunggongvirae	Uroviricota	Caudoviricetes		Kwiatkowskiviridae	Stephanstirmvirinae	Justusliebigvirus	NA	Justusliebigvirus PD06	Escherichia phage vB_vPM_PD06			CG	dsDNA
GCA_003613335.1_ASM361333v1	Duplodnaviria	Heunggongvirae	Uroviricota	Caudoviricetes				Wifcevirus	NA	Wifcevirus FEC19	Escherichia phage FEC19			CG	dsDNA
GCA_003613355.1_ASM361335v1	Duplodnaviria	Heunggongvirae	Uroviricota	Caudoviricetes				Saclayvirus	NA	Saclayvirus Aci011	Acinetobacter phage vB_AbaM_B09_Aci01-1			CG	dsDNA
GCA_003613375.1_ASM361337v1	Duplodnaviria	Heunggongvirae	Uroviricota	Caudoviricetes				Saclayvirus	NA	Saclayvirus Aci022	Acinetobacter phage vB_AbaM_B09_Aci02-2			CG	dsDNA
GCA_003613435.1_ASM361343v1	Duplodnaviria	Heunggongvirae	Uroviricota	Caudoviricetes				Burrovirus	NA	Burrovirus burro	Microbacterium phage Burro			CG	dsDNA
GCA_003613605.1_ASM361360v1	Duplodnaviria	Heunggongvirae	Uroviricota	Caudoviricetes		Peduoviridae		Novemvirus	NA	Novemvirus T5282H	Enterobacter phage phiT5282H			CG	dsDNA
GCA_003613635.1_ASM361363v1	Duplodnaviria	Heunggongvirae	Uroviricota	Caudoviricetes				Salmondvirus	NA	Salmondvirus JA11	Dickeya phage vB_DsoM_JA11			CG	dsDNA
GCA_003613875.1_ASM361387v1	Duplodnaviria	Heunggongvirae	Uroviricota	Caudoviricetes			Bclasvirinae	Saguarovirus	NA	Saguarovirus saguaro	Mycobacterium phage Saguaro			CG	dsDNA
GCA_003613915.1_ASM361391v1	Duplodnaviria	Heunggongvirae	Uroviricota	Caudoviricetes				Saclayvirus	NA	Saclayvirus Aci05	Acinetobacter phage vB_AbaM_B09_Aci05			CG	dsDNA
GCA_003614015.1_ASM361401v1	Duplodnaviria	Heunggongvirae	Uroviricota	Caudoviricetes		Zierdtviridae	Petrovskivirinae	Kablunavirus	NA	Kablunavirus buggaboo	Gordonia phage Buggaboo			CG	dsDNA
GCA_003614055.1_ASM361405v1	Duplodnaviria	Heunggongvirae	Uroviricota	Caudoviricetes		Zierdtviridae	Petrovskivirinae	Foxborovirus	NA	Foxborovirus emianna	Gordonia phage Emianna			CG	dsDNA
GCA_003614115.1_ASM361411v1	Duplodnaviria	Heunggongvirae	Uroviricota	Caudoviricetes			Langleyhallvirinae	Getalongvirus	NA	Getalongvirus getalong	Gordonia phage Getalong			CG	dsDNA
GCA_003614215.1_ASM361421v1	Duplodnaviria	Heunggongvirae	Uroviricota	Caudoviricetes			Gclasvirinae	Liefievirus	NA	Liefievirus grizzly	Mycobacterium phage Grizzly			CG	dsDNA
GCA_003614635.1_ASM361463v1	Duplodnaviria	Heunggongvirae	Uroviricota	Caudoviricetes		Salasmaviridae	Northropvirinae	Claudivirus	NA	Claudivirus Goe4	Bacillus phage vB_BthP-Goe4			CG	dsDNA
GCA_003665765.1_ASM366576v1	Duplodnaviria	Heunggongvirae	Uroviricota	Caudoviricetes		Herelleviridae		Harbinvirus	NA	Harbinvirus iacchus	Lactobacillus phage Iacchus			CG	dsDNA
GCA_003665805.1_ASM366580v1	Duplodnaviria	Heunggongvirae	Uroviricota	Caudoviricetes		Herelleviridae		Harbinvirus	NA	Harbinvirus bromius	Lactobacillus phage Bromius			CG	dsDNA
GCA_003668255.1_ASM366825v1	Duplodnaviria	Heunggongvirae	Uroviricota	Caudoviricetes		Casjensviridae		Yonseivirus	NA	Yonseivirus seifer	Klebsiella phage Seifer			CG	dsDNA
GCA_003668295.1_ASM366829v1	Duplodnaviria	Heunggongvirae	Uroviricota	Caudoviricetes		Demerecviridae		Novosibvirus	NA	Novosibvirus stubb	Proteus phage Stubb			CG	dsDNA
GCA_003668315.1_ASM366831v1	Duplodnaviria	Heunggongvirae	Uroviricota	Caudoviricetes		Herelleviridae	Brockvirinae	Schiekvirus	NA	Schiekvirus EfV12	Enterococcus phage EfV12-phi1			CG	dsDNA
GCA_003668515.1_ASM366851v1	Duplodnaviria	Heunggongvirae	Uroviricota	Caudoviricetes		Drexlerviridae		Kyungwonvirus	NA	Kyungwonvirus CS01	Cronobacter phage CS01			CG	dsDNA
GCA_003691935.1_ASM369193v1	Duplodnaviria	Heunggongvirae	Uroviricota	Caudoviricetes				Armstrongvirus	NA	Armstrongvirus armstrong	Microbacterium phage Armstrong			CG	dsDNA
GCA_003692035.1_ASM369203v1	Duplodnaviria	Heunggongvirae	Uroviricota	Caudoviricetes				Bridgettevirus	NA	Bridgettevirus bridgette	Arthrobacter phage Bridgette			CG	dsDNA
GCA_003692075.1_ASM369207v1	Duplodnaviria	Heunggongvirae	Uroviricota	Caudoviricetes				Bridgettevirus	NA	Bridgettevirus constance	Arthrobacter phage Constance			CG	dsDNA
GCA_003692175.1_ASM369217v1	Duplodnaviria	Heunggongvirae	Uroviricota	Caudoviricetes				Bridgettevirus	NA	Bridgettevirus eileen	Arthrobacter phage Eileen			CG	dsDNA
GCA_003692215.1_ASM369221v1	Duplodnaviria	Heunggongvirae	Uroviricota	Caudoviricetes				Fowlmouthvirus	NA	Fowlmouthvirus fowlmouth	Mycobacterium phage Fowlmouth			CG	dsDNA
GCA_003692515.1_ASM369251v1	Duplodnaviria	Heunggongvirae	Uroviricota	Caudoviricetes				Andrewvirus	NA	Andrewvirus andrew	Arthrobacter phage Andrew			CG	dsDNA
GCA_003692535.1_ASM369253v1	Duplodnaviria	Heunggongvirae	Uroviricota	Caudoviricetes				Coralvirus	NA	Coralvirus coral	Arthrobacter phage Coral			CG	dsDNA
GCA_003692555.1_ASM369255v1	Duplodnaviria	Heunggongvirae	Uroviricota	Caudoviricetes				Coralvirus	NA	Coralvirus kepler	Arthrobacter phage Kepler			CG	dsDNA
GCA_003715125.1_ASM371512v1	Duplodnaviria	Heunggongvirae	Uroviricota	Caudoviricetes		Peduoviridae		Bracchivirus	NA	Bracchivirus U2F1	Uncultured Caudovirales phage clone 2F_1, partial genome			CG	dsDNA
GCA_003718775.1_ASM371877v1	Duplodnaviria	Heunggongvirae	Uroviricota	Caudoviricetes		Ackermannviridae		Miltonvirus	NA	Miltonvirus 3M	Serratia phage vB_SmaA_3M			CG	dsDNA
GCA_003718835.1_ASM371883v1	Duplodnaviria	Heunggongvirae	Uroviricota	Caudoviricetes				Elmenteitavirus	NA	Elmenteitavirus ev125	Bacillus phage vB_BboS-125			CG	dsDNA
GCA_003718995.1_ASM371899v1	Duplodnaviria	Heunggongvirae	Uroviricota	Caudoviricetes				Gofduovirus	NA	Gofduovirus edno5	Edwardsiella phage Edno5			CG	dsDNA
GCA_003719015.1_ASM371901v1	Duplodnaviria	Heunggongvirae	Uroviricota	Caudoviricetes		Schitoviridae	Humphriesvirinae	Pylasvirus	NA	Pylasvirus KpCHEMY26	Klebsiella phage Pylas			CG	dsDNA
GCA_003719115.1_ASM371911v1	Duplodnaviria	Heunggongvirae	Uroviricota	Caudoviricetes		Schitoviridae	Erskinevirinae	Yonginvirus	NA	Kaypoctavirus KP8	Erwinia phage phiEaP-8			CG	dsDNA
GCA_003722535.1_ASM372253v1	Duplodnaviria	Heunggongvirae	Uroviricota	Caudoviricetes				Anjalivirus	NA	Anjalivirus anjali	Arthobacter phage Anjali			CG	dsDNA
GCA_003722615.1_ASM372261v1	Duplodnaviria	Heunggongvirae	Uroviricota	Caudoviricetes				Goodmanvirus	NA	Goodmanvirus goodman	Microbacterium phage Goodman			CG	dsDNA
GCA_003722715.1_ASM372271v1	Duplodnaviria	Heunggongvirae	Uroviricota	Caudoviricetes				Anjalivirus	NA	Anjalivirus mendel	Arthobacter phage Mendel			CG	dsDNA
GCA_003722815.1_ASM372281v1	Duplodnaviria	Heunggongvirae	Uroviricota	Caudoviricetes				Kroosvirus	NA	Kroosvirus bizzy	Gordonia phage Bizzy			CG	dsDNA
GCA_003722855.1_ASM372285v1	Duplodnaviria	Heunggongvirae	Uroviricota	Caudoviricetes				Kroosvirus	NA	Kroosvirus gaea	Gordonia phage Gaea			CG	dsDNA
GCA_003723295.1_ASM372329v1	Duplodnaviria	Heunggongvirae	Uroviricota	Caudoviricetes				Deseoctovirus	NA	Deseoctovirus C1	Escherichia phage C1			CG	dsDNA
GCA_003723375.1_ASM372337v1	Duplodnaviria	Heunggongvirae	Uroviricota	Caudoviricetes				Behunavirus	NA	Behunavirus BH1	Lactobacillus phage BH1			CG	dsDNA
GCA_003723455.1_ASM372345v1	Duplodnaviria	Heunggongvirae	Uroviricota	Caudoviricetes		Kyanoviridae		Leucotheavirus	NA	Leucotheavirus sp4	Synechoccus phage S-P4			CG	dsDNA
GCA_003764565.1_ASM376456v1	Duplodnaviria	Heunggongvirae	Uroviricota	Caudoviricetes		Autographiviridae	Corkvirinae	Kotilavirus	NA	Kotilavirus PPWS2	Pectobacterium phage PPWS2			CG	dsDNA
GCA_003843585.1_ASM384358v1	Duplodnaviria	Heunggongvirae	Uroviricota	Caudoviricetes		Zobellviridae	Cobavirinae	Veravirus	NA	Lentibacter virus ICBM2	Lentibacter phage vB_LenP_ICBM2	ICBM2		CG	dsDNA
GCA_003843605.1_ASM384360v1	Duplodnaviria	Heunggongvirae	Uroviricota	Caudoviricetes		Zobellviridae	Cobavirinae	Siovirus	NA	Lentibacter virus ICBM1	Lentibacter phage vB_LenP_ICBM1	ICBM1		CG	dsDNA
GCA_003846115.1_ASM384611v1	Duplodnaviria	Heunggongvirae	Uroviricota	Caudoviricetes			Tybeckvirinae	Lidleunavirus	NA	Lidleunavirus ViSo2018a	Lactobacillus phage ViSo-2018a			Partial genome	dsDNA
GCA_003861635.1_ASM386163v1	Duplodnaviria	Heunggongvirae	Uroviricota	Caudoviricetes			Kantovirinae	Beograduvirus	NA	Beograduvirus KPhi1	Xanthomonas phage KPhi1			CG	dsDNA
GCA_003861695.1_ASM386169v1	Duplodnaviria	Heunggongvirae	Uroviricota	Caudoviricetes				Aokuangvirus	NA	Aokuangvirus SCBWM1	Synechococcus phage S-CBWM1			CG	dsDNA
GCA_003865495.1_ASM386549v1	Duplodnaviria	Heunggongvirae	Uroviricota	Caudoviricetes		Peduoviridae		Citexvirus	NA	Citexvirus dobby	Pseudomonas phage Dobby			CG	dsDNA
GCA_003865535.3_ASM386553v3	Duplodnaviria	Heunggongvirae	Uroviricota	Caudoviricetes		Autographiviridae	Melnykvirinae	Wanjuvirus	NA	Wanjuvirus arno160	Pectobacterium phage Arno160			CG	dsDNA
GCA_003865675.1_ASM386567v1	Duplodnaviria	Heunggongvirae	Uroviricota	Caudoviricetes				Skarprettervirus	NA	Skarprettervirus skarpretter	Escherichia phage Skarpretter			CG	dsDNA
GCA_003865695.1_ASM386569v1	Duplodnaviria	Heunggongvirae	Uroviricota	Caudoviricetes				Murrayvirus	NA	Salmonella virus Lumpael	Salmonella phage Lumpael			CG	dsDNA
GCA_003926195.1_ASM392619v1	Varidnaviria	Bamfordvirae	Preplasmiviricota	Tectiliviricetes		Autolykiviridae		Paulavirus	NA	Paulavirus viph1008o	Vibrio phage 1.008.O._10N.286.54.E5	1.008.O.		CG	dsDNA
GCA_003926355.1_ASM392635v1	Varidnaviria	Bamfordvirae	Preplasmiviricota	Tectiliviricetes		Autolykiviridae		Paulavirus	NA	Paulavirus viph1020o	Vibrio phage 1.020.O._10N.222.48.A2	1.020.O.		CG	dsDNA
GCA_003926515.1_ASM392651v1	Duplodnaviria	Heunggongvirae	Uroviricota	Caudoviricetes		Schitoviridae	Pontosvirinae	Nahantvirus	NA	Nahantvirus 49C7	Vibrio phage 1.026.O._10N.222.49.C7			PG	dsDNA
GCA_003926855.1_ASM392685v1	Varidnaviria	Bamfordvirae	Preplasmiviricota	Tectiliviricetes		Autolykiviridae		Livvievirus	NA	Paulavirus viph1044o	Vibrio phage 1.044.O._10N.261.51.B8	1.044.O.		CG	dsDNA
GCA_003927295.1_ASM392729v1	Varidnaviria	Bamfordvirae	Preplasmiviricota	Tectiliviricetes		Autolykiviridae		Paulavirus	NA	Paulavirus viph1080o	Vibrio phage 1.080.O._10N.286.48.A4	1.080.O.		CG	dsDNA
GCA_003929175.1_ASM392917v1	Duplodnaviria	Heunggongvirae	Uroviricota	Caudoviricetes		Schitoviridae		Mukerjeevirus	NA	Mukerjeevirus mv51A6	Vibrio phage 1.188.A._10N.286.51.A6			CG	dsDNA
GCA_003929535.1_ASM392953v1	Duplodnaviria	Heunggongvirae	Uroviricota	Caudoviricetes		Autographiviridae		Cyclitvirus	NA	Cyclitvirus cyclit	Vibrio phage 1.204.O._10N.222.46.F12			CG	dsDNA
GCA_003929875.1_ASM392987v1	Duplodnaviria	Heunggongvirae	Uroviricota	Caudoviricetes		Schitoviridae		Mukerjeevirus	NA	Mukerjeevirus mv48B1	Vibrio phage 1.224.A._10N.261.48.B1			CG	dsDNA
GCA_003930115.1_ASM393011v1	Duplodnaviria	Heunggongvirae	Uroviricota	Caudoviricetes		Schitoviridae		Pariacacavirus	NA	Glaucusvirus 1238A	Vibrio phage 1.238.A._10N.261.52.F10			CG	dsDNA
GCA_003930255.1_ASM393025v1	Duplodnaviria	Heunggongvirae	Uroviricota	Caudoviricetes		Schitoviridae		Pariacacavirus	NA	Glaucusvirus 1245O	Vibrio phage 1.245.O._10N.261.54.C7			CG	dsDNA
GCA_003930355.1_ASM393035v1	Varidnaviria	Bamfordvirae	Preplasmiviricota	Tectiliviricetes		Autolykiviridae		Livvievirus	NA	Livvievirus viph1249a	Vibrio phage 1.249.A._10N.261.55.B9	1.249.A.		CG	dsDNA
GCA_003930555.1_ASM393055v1	Duplodnaviria	Heunggongvirae	Uroviricota	Caudoviricetes		Schitoviridae		Mukerjeevirus	NA	Mukerjeevirus mv51A7	Vibrio phage 1.261.O._10N.286.51.A7			CG	dsDNA
GCA_003931475.1_ASM393147v1	Duplodnaviria	Heunggongvirae	Uroviricota	Caudoviricetes			Gorgonvirinae	Tidunavirus	NA	Tidunavirus VP4B	Vibrio phage VP4B			Partial genome	dsDNA
GCA_003958705.1_ASM395870v1	Duplodnaviria	Heunggongvirae	Uroviricota	Caudoviricetes		Peduoviridae		Gemsvirus	NA	Gemsvirus gv5004652	Escherichia phage 500465-2			CG	dsDNA
GCA_003958765.1_ASM395876v1	Duplodnaviria	Heunggongvirae	Uroviricota	Caudoviricetes		Peduoviridae		Xuanwuvirus	NA	Xuanwuvirus xv503458	Escherichia phage 503458			CG	dsDNA
GCA_003958845.1_ASM395884v1	Duplodnaviria	Heunggongvirae	Uroviricota	Caudoviricetes		Peduoviridae		Wadgaonvirus	NA	Wadgaonvirus wv5004651	Escherichia phage 500465-1			CG	dsDNA
GCA_003991665.1_ASM399166v1	Duplodnaviria	Heunggongvirae	Uroviricota	Caudoviricetes		Autographiviridae	Melnykvirinae	Aerosvirus	NA	Aerosvirus ZPAH7	Aeromonas phage ZPAH7			CG	dsDNA
GCA_004006745.1_ASM400674v1	Duplodnaviria	Heunggongvirae	Uroviricota	Caudoviricetes		Drexlerviridae		Sauletekiovirus	NA	Sauletekiovirus AAS23	Pantoea phage vB_PagS_AAS23			CG	dsDNA
GCA_004006885.1_ASM400688v1	Duplodnaviria	Heunggongvirae	Uroviricota	Caudoviricetes				Hiyaavirus	NA	Hiyaavirus hiyaa	Streptomyces phage Hiyaa			CG	dsDNA
GCA_004007315.1_ASM400731v1	Duplodnaviria	Heunggongvirae	Uroviricota	Caudoviricetes				Pukovnikvirus	NA	Pukovnikvirus ironman	Mycobacterium phage IronMan			CG	dsDNA
GCA_004008425.1_ASM400842v1	Duplodnaviria	Heunggongvirae	Uroviricota	Caudoviricetes				Majavirus	NA	Arthrobacter virus Maja	Arthrobacter phage Maja			CG	dsDNA
GCA_004008635.1_ASM400863v1	Duplodnaviria	Heunggongvirae	Uroviricota	Caudoviricetes				Barnyardvirus	NA	Barnyardvirus drlupo	Mycobacterium phage DrLupo			CG	dsDNA
GCA_004015585.1_ASM401558v1	Duplodnaviria	Heunggongvirae	Uroviricota	Caudoviricetes		Straboviridae	Twarogvirinae	Hadassahvirus	NA	Hadassahvirus azbtza1	Acinetobacter phage AbTZA1			CG	dsDNA
GCA_004015965.1_ASM401596v1	Duplodnaviria	Heunggongvirae	Uroviricota	Caudoviricetes				Schubertvirus	NA	Microbacterium virus Schubert	Microbacterium phage Schubert			CG	dsDNA
GCA_004135185.1_ASM413518v1	Duplodnaviria	Heunggongvirae	Uroviricota	Caudoviricetes		Salasmaviridae	Northropvirinae	Hemphillvirus	NA	Hemphillvirus DK1	Bacillus phage DK1			CG	dsDNA
GCA_004135225.1_ASM413522v1	Duplodnaviria	Heunggongvirae	Uroviricota	Caudoviricetes		Salasmaviridae	Northropvirinae	Hemphillvirus	NA	Hemphillvirus DK2	Bacillus phage DK2			CG	dsDNA
GCA_004135245.1_ASM413524v1	Duplodnaviria	Heunggongvirae	Uroviricota	Caudoviricetes		Salasmaviridae	Northropvirinae	Hemphillvirus	NA	Hemphillvirus DK3	Bacillus phage DK3			CG	dsDNA
GCA_004138795.1_ASM413879v1	Duplodnaviria	Heunggongvirae	Uroviricota	Caudoviricetes		Drexlerviridae	Braunvirinae	Christensenvirus	NA	Christensenvirus IME542	Escherichia phage vB_EcoS_IME542			CG	dsDNA
GCA_004138855.1_ASM413885v1	Duplodnaviria	Heunggongvirae	Uroviricota	Caudoviricetes			Weiservirinae	Fionnbharthvirus	NA	Fionnbharthvirus henu3	Mycobacterium phage Henu3			CG	dsDNA
GCA_004139035.1_ASM413903v1	Duplodnaviria	Heunggongvirae	Uroviricota	Caudoviricetes			Deejayvirinae	Kenoshavirus	NA	Kenoshavirus duffington	Gordonia phage Duffington			CG	dsDNA
GCA_004139115.1_ASM413911v1	Duplodnaviria	Heunggongvirae	Uroviricota	Caudoviricetes			Langleyhallvirinae	Getalongvirus	NA	Getalongvirus asapag	Gordonia phage Asapag			CG	dsDNA
GCA_004139135.1_ASM413913v1	Duplodnaviria	Heunggongvirae	Uroviricota	Caudoviricetes		Zierdtviridae	Petrovskivirinae	Kablunavirus	NA	Kablunavirus nosilaM	Gordonia phage NosilaM			CG	dsDNA
GCA_004139235.1_ASM413923v1	Duplodnaviria	Heunggongvirae	Uroviricota	Caudoviricetes				Carpasinavirus	NA	Carpasinavirus XcP1	Xanthomonas virus XcP1			CG	dsDNA
GCA_004146645.1_ASM414664v1	Duplodnaviria	Heunggongvirae	Uroviricota	Caudoviricetes			Brucestockervirinae	Collbasmedvirus	NA	Collbasmedvirus YX3973	Klebsiella phage YX3973			CG	dsDNA
GCA_004146665.1_ASM414666v1	Duplodnaviria	Heunggongvirae	Uroviricota	Caudoviricetes		Autographiviridae		Kakivirus	NA	Kakivirus PS3	Providencia phage vB_PstP_PS3			CG	dsDNA
GCA_004146745.1_ASM414674v1	Duplodnaviria	Heunggongvirae	Uroviricota	Caudoviricetes				Segzyvirus	NA	Segzyvirus segz1	Salmonella phage Segz_1			CG	dsDNA
GCA_004147045.1_ASM414704v1	Duplodnaviria	Heunggongvirae	Uroviricota	Caudoviricetes		Demerecviridae		Pogseptimavirus	NA	Pogseptimavirus VspSw1	Vibrio phage VspSw_1			CG	dsDNA
GCA_004147145.1_ASM414714v1	Duplodnaviria	Heunggongvirae	Uroviricota	Caudoviricetes		Rountreeviridae	Sarlesvirinae	Minhovirus	NA	Minhovirus zip	Enterococcus phage vB_EfaP_Zip			CG	dsDNA
GCA_004147225.1_ASM414722v1	Duplodnaviria	Heunggongvirae	Uroviricota	Caudoviricetes				Sonalivirus	NA	Arthrobacter virus Sonali	Arthrobacter phage Sonali			CG	dsDNA
GCA_004147405.1_ASM414740v1	Duplodnaviria	Heunggongvirae	Uroviricota	Caudoviricetes		Vilmaviridae	Lclasvirinae	Bronvirus	NA	Bronvirus cicholasnage	Mycobacterium phage CicholasNage			CG	dsDNA
GCA_004149105.1_ASM414910v1	Duplodnaviria	Heunggongvirae	Uroviricota	Caudoviricetes				Austintatiousvirus	NA	Austintatiousvirus austintatious	Streptomyces phage Austintatious			CG	dsDNA
GCA_004149125.1_ASM414912v1	Varidnaviria	Bamfordvirae	Preplasmiviricota	Tectiliviricetes	Kalamavirales	Tectiviridae		Deltatectivirus	NA	Streptomyces virus WheeHeim	Streptomyces phage WheeHeim			CG	dsDNA
GCA_004149165.1_ASM414916v1	Duplodnaviria	Heunggongvirae	Uroviricota	Caudoviricetes				Vashvirus	NA	Streptomyces virus Vash	Streptomyces phage Vash			CG	dsDNA
GCA_004149205.1_ASM414920v1	Duplodnaviria	Heunggongvirae	Uroviricota	Caudoviricetes				Vashvirus	NA	Streptomyces virus Lilbooboo	Streptomyces phage Lilbooboo			CG	dsDNA
GCA_004149385.1_ASM414938v1	Duplodnaviria	Heunggongvirae	Uroviricota	Caudoviricetes			Arquatrovirinae	Janusvirus	NA	Janusvirus janus	Streptomyces phage Janus			CG	dsDNA
GCA_004149845.1_ASM414984v1	Duplodnaviria	Heunggongvirae	Uroviricota	Caudoviricetes				Dexdertvirus	NA	Dexdertvirus tiamoceli	Gordonia phage Tiamoceli			CG	dsDNA
GCA_004149905.1_ASM414990v1	Duplodnaviria	Heunggongvirae	Uroviricota	Caudoviricetes		Zierdtviridae	Petrovskivirinae	Sukkupivirus	NA	Sukkupivirus idyn	Gordonia phage IDyn			CG	dsDNA
GCA_004149985.1_ASM414998v1	Duplodnaviria	Heunggongvirae	Uroviricota	Caudoviricetes				Lietduovirus	NA	Lietduovirus LIET2	Pantoea phage vB_PagM_LIET2			CG	dsDNA
GCA_004193995.1_ASM419399v1	Duplodnaviria	Heunggongvirae	Uroviricota	Caudoviricetes			Kantovirinae	Tsukubavirus	NA	Tsukubavirus XPP1	Xanthomonas phage XPP1			CG	dsDNA
GCA_004194135.1_ASM419413v1	Duplodnaviria	Heunggongvirae	Uroviricota	Caudoviricetes			Kantovirinae	Tsukubavirus	NA	Tsukubavirus XPV1	Xanthomonas phage XPV1			CG	dsDNA
GCA_004194215.1_ASM419421v1	Duplodnaviria	Heunggongvirae	Uroviricota	Caudoviricetes		Schitoviridae		Electravirus	NA	Electravirus Sbp1	Vibrio virus vB_VspP_SBP1			CG	dsDNA
GCA_004338005.1_ASM433800v1	Duplodnaviria	Heunggongvirae	Uroviricota	Caudoviricetes			Bclasvirinae	Quesadillavirus	NA	Quesadillavirus CRB2	Mycobacterium phage CRB2			CG	dsDNA
GCA_004338415.1_ASM433841v1	Duplodnaviria	Heunggongvirae	Uroviricota	Caudoviricetes				Myohalovirus	NA	Myohalovirus chaoS9	Halobacterium virus ChaoS9	ChaoS9		CG	dsDNA
GCA_004338495.1_ASM433849v1	Duplodnaviria	Heunggongvirae	Uroviricota	Caudoviricetes			Weiservirinae	Fionnbharthvirus	NA	Fionnbharthvirus patt	Mycobacterium phage Patt			CG	dsDNA
GCA_004339065.1_ASM433906v1	Duplodnaviria	Heunggongvirae	Uroviricota	Caudoviricetes				Metamorphoovirus	NA	Microbacterium virus Fireman	Microbacterium phage Fireman			CG	dsDNA
GCA_004339925.1_ASM433992v1	Duplodnaviria	Heunggongvirae	Uroviricota	Caudoviricetes			Arquatrovirinae	Caelumvirus	NA	Caelumvirus caelum	Streptomyces phage Caelum			CG	dsDNA
GCA_004340325.1_ASM434032v1	Duplodnaviria	Heunggongvirae	Uroviricota	Caudoviricetes				Myohalovirus	NA	Myohalovirus PhiCh1	Natrialba virus PhiCh1	PhiCh1		CG	dsDNA
GCA_004340505.2_ASM434050v2	Duplodnaviria	Heunggongvirae	Uroviricota	Caudoviricetes				Lanavirus	NA	Pseudomonas virus Lana	Pseudomonas phage Lana			CG	dsDNA
GCA_004400365.1_ASM440036v1	Duplodnaviria	Heunggongvirae	Uroviricota	Caudoviricetes		Peduoviridae		Citexvirus	NA	Citexvirus BR319A	Pseudomonas phage vB_Pae_BR319a			CG	dsDNA
GCA_004519775.1_ASM451977v1	Duplodnaviria	Heunggongvirae	Uroviricota	Caudoviricetes		Peduoviridae		Kapieceevirus	NA	Kapieceevirus ST512KPC3phi132	Klebsiella phage ST512-KPC3phi13.2			CG	dsDNA
GCA_004519835.1_ASM451983v1	Duplodnaviria	Heunggongvirae	Uroviricota	Caudoviricetes		Peduoviridae		Dagavirus	NA	Dagavirus ST13OXA48phi121	Klebsiella phage ST13-OXA48phi12.1			CG	dsDNA
GCA_004520375.1_ASM452037v1	Duplodnaviria	Heunggongvirae	Uroviricota	Caudoviricetes				Typhavirus	NA	Typhavirus typha	Mycobacterium phage Typha			CG	dsDNA
GCA_004520475.1_ASM452047v1	Duplodnaviria	Heunggongvirae	Uroviricota	Caudoviricetes			Gclasvirinae	Pinnievirus	NA	Pinnievirus pinnie	Mycobacterium phage Pinnie			CG	dsDNA
GCA_004521015.1_ASM452101v1	Duplodnaviria	Heunggongvirae	Uroviricota	Caudoviricetes				Oneupvirus	NA	Gordonia virus BrutonGaster	Gordonia phage BrutonGaster			CG	dsDNA
GCA_004521275.1_ASM452127v1	Duplodnaviria	Heunggongvirae	Uroviricota	Caudoviricetes				Goslarvirus	NA	Goslarvirus goslar	Escherichia phage vB_EcoM_Goslar			CG	dsDNA
GCA_004521515.1_ASM452151v1	Duplodnaviria	Heunggongvirae	Uroviricota	Caudoviricetes		Autographiviridae		Qadamvirus	NA	Qadamvirus SB28	Synechococcus phage S-B28			CG	dsDNA
GCA_004521655.1_ASM452165v1	Duplodnaviria	Heunggongvirae	Uroviricota	Caudoviricetes				Derbicusvirus	NA	Derbicusvirus derbicus	Erwinia phage Derbicus			CG	dsDNA
GCA_004521775.1_ASM452177v1	Duplodnaviria	Heunggongvirae	Uroviricota	Caudoviricetes		Peduoviridae		Reipivirus	NA	Reipivirus ST16OXA48phi54	Klebsiella phage ST16-OXA48phi5.4			CG	dsDNA
GCA_004521815.1_ASM452181v1	Duplodnaviria	Heunggongvirae	Uroviricota	Caudoviricetes		Peduoviridae		Gegevirus	NA	Gegevirus ST437OXA245phi41	Klebsiella phage ST437-OXA245phi4.1			CG	dsDNA
GCA_004610715.1_ASM461071v1	Duplodnaviria	Heunggongvirae	Uroviricota	Caudoviricetes		Autographiviridae	Slopekvirinae	Bucovirus	NA	Bucovirus buco	Shigella_phage_Buco			CG	dsDNA
GCA_004768965.1_ASM476896v1	Duplodnaviria	Heunggongvirae	Uroviricota	Caudoviricetes				Coventryvirus	NA	Coventryvirus SP120	Staphylococcus phage SP120			CG	dsDNA
GCA_004768985.1_ASM476898v1	Duplodnaviria	Heunggongvirae	Uroviricota	Caudoviricetes				Coventryvirus	NA	Coventryvirus SP197	Staphylococcus phage SP197			CG	dsDNA
GCA_004771375.1_ASM477137v1	Duplodnaviria	Heunggongvirae	Uroviricota	Caudoviricetes				Sarumanvirus	NA	Sarumanvirus bcepsaruman	Burkholderia phage BcepSaruman			CG	dsDNA
GCA_004799845.1_ASM479984v1	Duplodnaviria	Heunggongvirae	Uroviricota	Caudoviricetes				Akiravirus	NA	Akiravirus akira	Salmonella phage Akira			CG	dsDNA
GCA_004800025.1_ASM480002v1	Duplodnaviria	Heunggongvirae	Uroviricota	Caudoviricetes				Godonkavirus	NA	Godonkavirus godonK	Gordonia phage GodonK			CG	dsDNA
GCA_004800045.1_ASM480004v1	Varidnaviria	Bamfordvirae	Preplasmiviricota	Tectiliviricetes	Kalamavirales	Tectiviridae		Deltatectivirus	NA	Streptomyces virus Forthebois	Streptomyces phage Forthebois			CG	dsDNA
GCA_004800205.1_ASM480020v1	Duplodnaviria	Heunggongvirae	Uroviricota	Caudoviricetes		Autographiviridae		Bonnellvirus	NA	Bonnellvirus lidtsur	Escherichia phage_Lidtsur			CG	dsDNA
GCA_004800265.1_ASM480026v1	Duplodnaviria	Heunggongvirae	Uroviricota	Caudoviricetes				Sortsnevirus	NA	Sortsnevirus sortsne	Escherichia phage Sortsne			CG	dsDNA
GCA_004800625.1_ASM480062v1	Duplodnaviria	Heunggongvirae	Uroviricota	Caudoviricetes		Rountreeviridae	Sarlesvirinae	Copernicusvirus	NA	Copernicusvirus Ef62	Enterococcus phage vB_EfaP_Ef6.2			CG	dsDNA
GCA_004800785.1_ASM480078v1	Duplodnaviria	Heunggongvirae	Uroviricota	Caudoviricetes		Rountreeviridae	Sarlesvirinae	Copernicusvirus	NA	Copernicusvirus Ef63	Enterococcus phage vB_EfaP_Ef6.3			CG	dsDNA
GCA_004800915.1_ASM480091v1	Duplodnaviria	Heunggongvirae	Uroviricota	Caudoviricetes				Petsuvirus	NA	Petsuvirus pEtSU	Edwardsiella phage pEt-SU			CG	dsDNA
GCA_004800935.1_ASM480093v1	Duplodnaviria	Heunggongvirae	Uroviricota	Caudoviricetes		Autographiviridae		Poseidonvirus	NA	Poseidonvirus SCBP4	Synechococcus phage S-CBP4			CG	dsDNA
GCA_004875685.1_ASM487568v1	Duplodnaviria	Heunggongvirae	Uroviricota	Caudoviricetes		Autographiviridae		Lirvirus	NA	Lirvirus SCBP3	Synechococcus phage S-CBP3			CG	dsDNA
GCA_005145325.1_ASM514532v1	Duplodnaviria	Heunggongvirae	Uroviricota	Caudoviricetes			Eekayvirinae	Akonivirus	NA	Akonivirus akoni	Microbacterium phage Akoni			CG	dsDNA
GCA_005145505.1_ASM514550v1	Duplodnaviria	Heunggongvirae	Uroviricota	Caudoviricetes				Fairfaxidumvirus	NA	Fairfaxidumvirus fairfaxidum	Gordonia phage Fairfaxidum			CG	dsDNA
GCA_005394125.1_ASM539412v1	Duplodnaviria	Heunggongvirae	Uroviricota	Caudoviricetes		Peduoviridae		Vimunumvirus	NA	Vimunumvirus ST147VIM1phi71	Klebsiella phage ST147-VIM1phi7.1			CG	dsDNA
GCA_005394165.1_ASM539416v1	Duplodnaviria	Heunggongvirae	Uroviricota	Caudoviricetes		Peduoviridae		Gegavirus	NA	Gegavirus ST15OXA48phi141	Klebsiella phage ST15-OXA48phi14.1			CG	dsDNA
GCA_005394215.1_ASM539421v1	Duplodnaviria	Heunggongvirae	Uroviricota	Caudoviricetes				Sarumanvirus	NA	Sarumanvirus bcepsauron	Burkholderia phage BcepSauron			CG	dsDNA
GCA_005566445.1_ASM556644v1	Duplodnaviria	Heunggongvirae	Uroviricota	Caudoviricetes				Deseoctovirus	NA	Deseoctovirus DS8	Shigella phage DS8			CG	dsDNA
GCA_005566875.1_ASM556687v1	Duplodnaviria	Heunggongvirae	Uroviricota	Caudoviricetes			Skryabinvirinae	Pushchinovirus	NA	Pushchinovirus B83	Bacillus phage vB_BtS_B83			CG	dsDNA
GCA_005568315.1_ASM556831v1	Duplodnaviria	Heunggongvirae	Uroviricota	Caudoviricetes				Barbavirus	NA	Barbavirus barba18A	Barba18A			CG	dsDNA
GCA_005568375.1_ASM556837v1	Duplodnaviria	Heunggongvirae	Uroviricota	Caudoviricetes				Barbavirus	NA	Barbavirus barba19A	Barba19A			CG	dsDNA
GCA_005568555.1_ASM556855v1	Duplodnaviria	Heunggongvirae	Uroviricota	Caudoviricetes				Barbavirus	NA	Barbavirus barba21A	Barba21A			CG	dsDNA
GCA_005890215.1_ASM589021v1	Duplodnaviria	Heunggongvirae	Uroviricota	Caudoviricetes				Fibralongavirus	NA	Fibralongavirus QT1	Staphylococcus phage vB_SpsS_QT1			CG	dsDNA
GCA_005891865.1_ASM589186v1	Duplodnaviria	Heunggongvirae	Uroviricota	Caudoviricetes				Parlovirus	NA	Parlovirus parlo	Serratia phage Parlo			CG	dsDNA
GCA_005891905.1_ASM589190v1	Duplodnaviria	Heunggongvirae	Uroviricota	Caudoviricetes				Myosmarvirus	NA	Myosmarvirus MTx	Serratia phage MTx			CG	dsDNA
GCA_005892005.1_ASM589200v1	Duplodnaviria	Heunggongvirae	Uroviricota	Caudoviricetes				Ravarandavirus	NA	Nodularia virus kac68v161	Nodularia phage vB_NspS-kac68v161			CG	dsDNA
GCA_005892145.1_ASM589214v1	Duplodnaviria	Heunggongvirae	Uroviricota	Caudoviricetes				Xuquatrovirus	NA	Xuquatrovirus PTXU04	Escherichia phage PTXU04			CG	dsDNA
GCA_005892205.1_ASM589220v1	Duplodnaviria	Heunggongvirae	Uroviricota	Caudoviricetes				Wifcevirus	NA	Wifcevirus WFC	Escherichia phage vB_EcoM_WFC			CG	dsDNA
GCA_005892845.1_ASM589284v1	Duplodnaviria	Heunggongvirae	Uroviricota	Caudoviricetes				Ravarandavirus	NA	Nodularia virus kac65v151	Nodularia phage vB_NspS-kac65v151			CG	dsDNA
GCA_006032195.1_ASM603219v1	Duplodnaviria	Heunggongvirae	Uroviricota	Caudoviricetes				Fremauxvirus	NA	Fremauxvirus CHPC971	Lactococcus phage CHPC971			CG	dsDNA
GCA_006083115.1_ASM608311v1	Duplodnaviria	Heunggongvirae	Uroviricota	Caudoviricetes		Drexlerviridae	Tempevirinae	Changchunvirus	NA	Changchunvirus W011D	Escherichia phage vB_EcoS_W011D			CG	dsDNA
GCA_006083715.1_ASM608371v1	Duplodnaviria	Heunggongvirae	Uroviricota	Caudoviricetes		Peduoviridae		Aresaunavirus	NA	Aresaunavirus RsoM1USA	Ralstonia phage RsoM1USA			CG	dsDNA
GCA_006177605.1_ASM617760v1	Duplodnaviria	Heunggongvirae	Uroviricota	Caudoviricetes		Herelleviridae		Tybeckvirus	NA	Tybeckvirus tv521B	Lactobacillus phage 521B			CG	dsDNA
GCA_006177625.1_ASM617762v1	Duplodnaviria	Heunggongvirae	Uroviricota	Caudoviricetes		Herelleviridae		Watanabevirus	NA	Watanabevirus wv3521	Lactobacillus phage 3-521			CG	dsDNA
GCA_006177745.1_ASM617774v1	Duplodnaviria	Heunggongvirae	Uroviricota	Caudoviricetes		Herelleviridae		Tybeckvirus	NA	Tybeckvirus SAC12B	Lactobacillus phage SAC12B			CG	dsDNA
GCA_006304545.1_ASM630454v1	Duplodnaviria	Heunggongvirae	Uroviricota	Caudoviricetes				Feofaniavirus	NA	Feofaniavirus Eho49	Erwinia phage vB_EhrS_49			CG	dsDNA
GCA_006304615.1_ASM630461v1	Duplodnaviria	Heunggongvirae	Uroviricota	Caudoviricetes				Feofaniavirus	NA	Feofaniavirus Eho59	Erwinia phage vB_EhrS_59			CG	dsDNA
GCA_006384275.1_ASM638427v1	Duplodnaviria	Heunggongvirae	Uroviricota	Caudoviricetes		Ackermannviridae		Vapseptimavirus	NA	Vapseptimavirus VAP7	Vibrio phage VAP7			CG	dsDNA
GCA_006384355.1_ASM638435v1	Duplodnaviria	Heunggongvirae	Uroviricota	Caudoviricetes				Kunmingvirus	NA	Kunmingvirus kv2D05	Aeromonas phage 2_D05			CG	dsDNA
GCA_006384375.1_ASM638437v1	Duplodnaviria	Heunggongvirae	Uroviricota	Caudoviricetes				Plateaulakevirus	NA	Plateaulakevirus pv2L372D	Aeromonas phage 2L372D			CG	dsDNA
GCA_006384555.1_ASM638455v1	Duplodnaviria	Heunggongvirae	Uroviricota	Caudoviricetes				Wizardvirus	NA	Wizardvirus Arri	Gordonia phage Arri			CG	dsDNA
GCA_006384735.1_ASM638473v1	Duplodnaviria	Heunggongvirae	Uroviricota	Caudoviricetes				Moabitevirus	NA	Moabitevirus moabite	Serratia phage Moabite			CG	dsDNA
GCA_006384795.1_ASM638479v1	Duplodnaviria	Heunggongvirae	Uroviricota	Caudoviricetes				Marfavirus	NA	Marfavirus marfa	Klebsiella phage Marfa			CG	dsDNA
GCA_006384835.1_ASM638483v1	Duplodnaviria	Heunggongvirae	Uroviricota	Caudoviricetes				Skatevirus	NA	Skatevirus KFSSE2	Salmonella virus KFS-SE2			CG	dsDNA
GCA_006529855.1_ASM652985v1	Duplodnaviria	Heunggongvirae	Uroviricota	Caudoviricetes			Eekayvirinae	Tinytimothyvirus	NA	Tinytimothyvirus alex44	Microbacterium phage Alex44			CG	dsDNA
GCA_006530075.1_ASM653007v1	Duplodnaviria	Heunggongvirae	Uroviricota	Caudoviricetes			Eekayvirinae	Tinytimothyvirus	NA	Tinytimothyvirus tinytimothy	Microbacterium phage TinyTimothy			CG	dsDNA
GCA_006530115.1_ASM653011v1	Duplodnaviria	Heunggongvirae	Uroviricota	Caudoviricetes				Fairfaxidumvirus	NA	Fairfaxidumvirus william	Gordonia phage William			CG	dsDNA
GCA_006530355.1_ASM653035v1	Duplodnaviria	Heunggongvirae	Uroviricota	Caudoviricetes				Puppervirus	NA	Puppervirus Pupper	Gordonia phage Pupper			CG	dsDNA
GCA_006530535.1_ASM653053v1	Duplodnaviria	Heunggongvirae	Uroviricota	Caudoviricetes				Samwavirus	NA	Corynebacterium virus Dina	Corynebacterium phage Dina			CG	dsDNA
GCA_006535815.1_ASM653581v1	Duplodnaviria	Heunggongvirae	Uroviricota	Caudoviricetes			Gracegardnervirinae	Thetabobvirus	NA	Mycobacterium virus ThetaBob	Mycobacterium phage ThetaBob			CG	dsDNA
GCA_006535875.1_ASM653587v1	Duplodnaviria	Heunggongvirae	Uroviricota	Caudoviricetes		Zierdtviridae	Petrovskivirinae	Skysandvirus	NA	Skysandvirus lollipop1437	Gordonia Phage Lollipop1437			CG	dsDNA
GCA_006863005.1_ASM686300v1	Duplodnaviria	Heunggongvirae	Uroviricota	Caudoviricetes				Rosemountvirus	NA	Rosemountvirus SE13	Salmonella phage SE13			CG	dsDNA
GCA_006863425.1_ASM686342v1	Duplodnaviria	Heunggongvirae	Uroviricota	Caudoviricetes				Dibbivirus	NA	Dibbivirus AAM37	Pantoea phage vB_PagM_AAM37			CG	dsDNA
GCA_006863475.1_ASM686347v1	Duplodnaviria	Heunggongvirae	Uroviricota	Caudoviricetes				Dibbivirus	NA	Dibbivirus PSKM	Pantoea phage vB_PagM_PSKM			CG	dsDNA
GCA_006863775.1_ASM686377v1	Duplodnaviria	Heunggongvirae	Uroviricota	Caudoviricetes				Lahexavirus	NA	Lahexavirus LAh6	Aeromonas phage LAh_6			CG	dsDNA
GCA_006863845.1_ASM686384v1	Duplodnaviria	Heunggongvirae	Uroviricota	Caudoviricetes		Casjensviridae		Sharonstreetvirus	NA	Sharonstreetvirus LAh7	Aeromonas phage LAh_7			CG	dsDNA
GCA_006863865.1_ASM686386v1	Duplodnaviria	Heunggongvirae	Uroviricota	Caudoviricetes				Lahexavirus	NA	Lahexavirus LAh8	Aeromonas phage LAh_8			CG	dsDNA
GCA_006863925.1_ASM686392v1	Duplodnaviria	Heunggongvirae	Uroviricota	Caudoviricetes				Lahexavirus	NA	Lahexavirus LAh9	Aeromonas phage LAh_9			CG	dsDNA
GCA_006864235.1_ASM686423v1	Duplodnaviria	Heunggongvirae	Uroviricota	Caudoviricetes				Turbidovirus	NA	Turbidovirus benvolio	Mycobacterium phage Benvolio			CG	dsDNA
GCA_006864805.1_ASM686480v1	Duplodnaviria	Heunggongvirae	Uroviricota	Caudoviricetes				Kylevirus	NA	Kylevirus kyle	Panteoa phage Kyle			CG	dsDNA
GCA_006869665.1_ASM686966v1	Duplodnaviria	Heunggongvirae	Uroviricota	Caudoviricetes		Salasmaviridae	Tatarstanvirinae	Karezivirus	NA	Karezivirus karezi	Bacillus phage Karezi			CG	dsDNA
GCA_006869785.2_ASM686978v2	Duplodnaviria	Heunggongvirae	Uroviricota	Caudoviricetes		Straboviridae	Twarogvirinae	Lazarusvirus	NA	Lazarusvirus am101	Acinetobacter phage AM101			CG	dsDNA
GCA_006964105.1_ASM696410v1	Duplodnaviria	Heunggongvirae	Uroviricota	Caudoviricetes			Gorgonvirinae	Aphroditevirus	NA	Aphroditevirus av2TSL2019	Vibrio phage 2 TSL-2019			CG	dsDNA
GCA_006964305.1_ASM696430v1	Duplodnaviria	Heunggongvirae	Uroviricota	Caudoviricetes				Moturavirus	NA	Moturavirus motura	Achromobacter phage Motura			CG	dsDNA
GCA_006964325.1_ASM696432v1	Duplodnaviria	Heunggongvirae	Uroviricota	Caudoviricetes		Schitoviridae	Rothmandenesvirinae	Dongdastvirus	NA	Dongdastvirus Axy04	Achromobacter phage vB_AxyP_19-32_Axy04			CG	dsDNA
GCA_006964385.1_ASM696438v1	Duplodnaviria	Heunggongvirae	Uroviricota	Caudoviricetes		Schitoviridae	Rothmandenesvirinae	Pourcelvirus	NA	Pourcelvirus Axy10	Achromobacter phage vB_AxyP_19-32_Axy10			CG	dsDNA
GCA_006964405.1_ASM696440v1	Duplodnaviria	Heunggongvirae	Uroviricota	Caudoviricetes		Schitoviridae	Rothmandenesvirinae	Pourcelvirus	NA	Pourcelvirus Axy11	Achromobacter phage vB_AxyP_19-32_Axy11			CG	dsDNA
GCA_006964425.1_ASM696442v1	Duplodnaviria	Heunggongvirae	Uroviricota	Caudoviricetes		Schitoviridae	Rothmandenesvirinae	Dongdastvirus	NA	Dongdastvirus Axy12	Achromobacter phage vB_AxyP_19-32_Axy12			CG	dsDNA
GCA_006964705.1_ASM696470v1	Duplodnaviria	Heunggongvirae	Uroviricota	Caudoviricetes			Ruthgordonvirinae	Dardanusvirus	NA	Dardanusvirus dardanus	Gordonia phage Dardanus			CG	dsDNA
GCA_006964885.1_ASM696488v1	Duplodnaviria	Heunggongvirae	Uroviricota	Caudoviricetes				Phrappuccinovirus	NA	Phrappuccinovirus Phrappuccino	Mycobacterium phage Phrappuccino			CG	dsDNA
GCA_006965185.1_ASM696518v1	Duplodnaviria	Heunggongvirae	Uroviricota	Caudoviricetes				Zitchvirus	NA	Zitchvirus zipp	Gordonia phage Zipp			CG	dsDNA
GCA_006965265.1_ASM696526v1	Duplodnaviria	Heunggongvirae	Uroviricota	Caudoviricetes				Zitchvirus	NA	Zitchvirus verity	Gordonia phage Verity			CG	dsDNA
GCA_006965345.1_ASM696534v1	Duplodnaviria	Heunggongvirae	Uroviricota	Caudoviricetes		Drexlerviridae	Tempevirinae	Changchunvirus	NA	Changchunvirus PHB17	Escherichia phage vB_EcoS_PHB17			CG	dsDNA
GCA_006965385.1_ASM696538v1	Duplodnaviria	Heunggongvirae	Uroviricota	Caudoviricetes				Samwavirus	NA	Corynebacterium virus Adelaide	Corynebacterium phage Adelaide			CG	dsDNA
GCA_007051145.1_ASM705114v1	Duplodnaviria	Heunggongvirae	Uroviricota	Caudoviricetes				Kunmingvirus	NA	Kunmingvirus kv4D05	Aeromonas phage 4_D05			CG	dsDNA
GCA_007051325.1_ASM705132v1	Duplodnaviria	Heunggongvirae	Uroviricota	Caudoviricetes			Pclasvirinae	Purkyvirus	NA	Purkyvirus purky	Mycobacterium phage Purky			CG	dsDNA
GCA_007051465.1_ASM705146v1	Duplodnaviria	Heunggongvirae	Uroviricota	Caudoviricetes				Vibakivirus	NA	Vibakivirus vibaki	Arthrobacter phage Vibaki			CG	dsDNA
GCA_007310875.1_ASM731087v1	Duplodnaviria	Heunggongvirae	Uroviricota	Caudoviricetes				Sleepyheadvirus	NA	Rhodococcus virus Sleepyhead	Rhodococcus phage Sleepyhead			CG	dsDNA
GCA_007311425.1_ASM731142v1	Duplodnaviria	Heunggongvirae	Uroviricota	Caudoviricetes				Whackvirus	NA	Rhodococcus virus Whack	Rhodococcus phage Whack			CG	dsDNA
GCA_007647105.1_ASM764710v1	Duplodnaviria	Heunggongvirae	Uroviricota	Caudoviricetes		Herelleviridae	Bastillevirinae	Goettingenvirus	NA	Goettingenvirus goe8	Bacillus phage vB_BmeM-Goe8			CG	dsDNA
GCA_007647415.1_ASM764741v1	Duplodnaviria	Heunggongvirae	Uroviricota	Caudoviricetes				Ilzatvirus	NA	Ilzatvirus mcgalleon	Microbacterium phage McGalleon			CG	dsDNA
GCA_007647435.1_ASM764743v1	Duplodnaviria	Heunggongvirae	Uroviricota	Caudoviricetes			Arquatrovirinae	Celiavirus	NA	Celiavirus celia	Streptomyces phage Celia			CG	dsDNA
GCA_007647645.1_ASM764764v1	Duplodnaviria	Heunggongvirae	Uroviricota	Caudoviricetes				Burrovirus	NA	Burrovirus araxxi	Microbacterium phage Araxxi			CG	dsDNA
GCA_007998335.1_ASM799833v1	Duplodnaviria	Heunggongvirae	Uroviricota	Caudoviricetes		Drexlerviridae	Tempevirinae	Henuseptimavirus	NA	Henuseptimavirus henu7	Escherichia phage Henu7			CG	dsDNA
GCA_007998555.1_ASM799855v1	Duplodnaviria	Heunggongvirae	Uroviricota	Caudoviricetes		Schitoviridae	Humphriesvirinae	Pylasvirus	NA	Pollockvirus pollock	Klebsiella phage KpCHEMY26			CG	dsDNA
GCA_008214025.1_ASM821402v1	Duplodnaviria	Heunggongvirae	Uroviricota	Caudoviricetes		Drexlerviridae	Tempevirinae	Warwickvirus	NA	Warwickvirus JK16	Shigella phage JK16			CG	dsDNA
GCA_008214915.1_ASM821491v1	Duplodnaviria	Heunggongvirae	Uroviricota	Caudoviricetes		Chaseviridae	Cleopatravirinae	Carltongylesvirus	NA	Carltongylesvirus mangalitsa	Escherichia phage Mangalitsa			CG	dsDNA
GCA_008215005.1_ASM821500v1	Duplodnaviria	Heunggongvirae	Uroviricota	Caudoviricetes				Plateaulakevirus	NA	Plateaulakevirus pv2L372X	Aeromonas phage 2L372X			CG	dsDNA
GCA_008215065.1_ASM821506v1	Duplodnaviria	Heunggongvirae	Uroviricota	Caudoviricetes				Plateaulakevirus	NA	Plateaulakevirus pv4L372D	Aeromonas phage 4L372D			CG	dsDNA
GCA_008215305.1_ASM821530v1	Duplodnaviria	Heunggongvirae	Uroviricota	Caudoviricetes		Schitoviridae		Pokkenvirus	NA	Pokkenvirus pokken	Stenotrophomonas phage Pokken			CG	dsDNA
GCA_008215405.1_ASM821540v1	Duplodnaviria	Heunggongvirae	Uroviricota	Caudoviricetes		Casjensviridae		Cenphatecvirus	NA	Cenphatecvirus saba	Proteus phage Saba			CG	dsDNA
GCA_008215425.1_ASM821542v1	Duplodnaviria	Heunggongvirae	Uroviricota	Caudoviricetes				Myosmarvirus	NA	Myosmarvirus myosmar	Serratia phage MyoSmar			CG	dsDNA
GCA_008227445.1_ASM822744v1	Duplodnaviria	Heunggongvirae	Uroviricota	Caudoviricetes		Peduoviridae		Irrigatiovirus	NA	Irrigatiovirus SI7	Salmonella phage SI7			CG	dsDNA
GCA_008375435.2_ASM837543v2	Duplodnaviria	Heunggongvirae	Uroviricota	Caudoviricetes		Schitoviridae		Zurivirus	NA	Zurivirus zuri	Pseudomonas phage Zuri			CG	dsDNA
GCA_008375495.1_ASM837549v1	Duplodnaviria	Heunggongvirae	Uroviricota	Caudoviricetes		Casjensviridae		Yonseivirus	NA	Yonseivirus soft	Klebsiella phage Soft			CG	dsDNA
GCA_008605685.1_ASM860568v1	Duplodnaviria	Heunggongvirae	Uroviricota	Caudoviricetes		Schitoviridae		Huelvavirus	NA	Huelvavirus ort11	Sinorhizobium phage ort11			CG	dsDNA
GCA_008704725.1_ASM870472v1	Duplodnaviria	Heunggongvirae	Uroviricota	Caudoviricetes		Casjensviridae		Gwanakrovirus	NA	Gwanakrovirus SNUABM08	Erwinia phage pEp_SNUABM_08			CG	dsDNA
GCA_008704755.1_ASM870475v1	Duplodnaviria	Heunggongvirae	Uroviricota	Caudoviricetes			Vequintavirinae	Henunavirus	NA	Henunavirus SNUABM01	Erwinia phage pEp_SNUABM_01			CG	dsDNA
GCA_008705035.1_ASM870503v1	Duplodnaviria	Heunggongvirae	Uroviricota	Caudoviricetes			Deejayvirinae	Kenoshavirus	NA	Kenoshavirus chikenjars	Gordonia phage Chikenjars			CG	dsDNA
GCA_008725535.1_ASM872553v1	Duplodnaviria	Heunggongvirae	Uroviricota	Caudoviricetes		Schitoviridae	Rhodovirinae	Plymouthvirus	NA	Plymouthvirus RPP1	Roseovarius phage vB_RsvN_RPP1; Roseovarius Plymouth Podovirus 1			PG	dsDNA
GCA_008801235.1_ASM880123v1	Duplodnaviria	Heunggongvirae	Uroviricota	Caudoviricetes		Guelinviridae	Denniswatsonvirinae	Gregsiragusavirus	NA	Gregsiragusavirus CPD2	Clostridium phage CPD2			CG	dsDNA
GCA_008938705.1_ASM893870v1	Duplodnaviria	Heunggongvirae	Uroviricota	Caudoviricetes				Fairfaxidumvirus	NA	Fairfaxidumvirus toast	Gordonia phage Toast			CG	dsDNA
GCA_008939205.1_ASM893920v1	Duplodnaviria	Heunggongvirae	Uroviricota	Caudoviricetes			Pclasvirinae	Phayoncevirus	NA	Phayoncevirus thulathula	Mycobacterium phage ThulaThula			CG	dsDNA
GCA_008939465.1_ASM893946v1	Duplodnaviria	Heunggongvirae	Uroviricota	Caudoviricetes				Triplejayvirus	NA	Arthrobacter virus TripleJ	Arthrobacter phage TripleJ			CG	dsDNA
GCA_008939545.1_ASM893954v1	Duplodnaviria	Heunggongvirae	Uroviricota	Caudoviricetes			Gclasvirinae	Antsirabevirus	NA	Antsirabevirus antsirabe	Mycobacterium phage Antsirabe			CG	dsDNA
GCA_008939585.1_ASM893958v1	Duplodnaviria	Heunggongvirae	Uroviricota	Caudoviricetes			Gclasvirinae	Jolieduovirus	NA	Jolieduovirus lemuria	Mycobacterium phage Lemuria			CG	dsDNA
GCA_008939625.1_ASM893962v1	Duplodnaviria	Heunggongvirae	Uroviricota	Caudoviricetes		Vilmaviridae	Lclasvirinae	Bromdenvirus	NA	Bromdenvirus dyoedafos	Mycobacterium phage DyoEdafos			CG	dsDNA
GCA_008939645.1_ASM893964v1	Duplodnaviria	Heunggongvirae	Uroviricota	Caudoviricetes				Anthonyvirus	NA	Anthonyvirus anthony	Mycobacterium phage Anthony			CG	dsDNA
GCA_008939685.1_ASM893968v1	Duplodnaviria	Heunggongvirae	Uroviricota	Caudoviricetes				Lambovirus	NA	Gordonia virus Gibbin	Gordonia phage Gibbin			CG	dsDNA
GCA_008940205.1_ASM894020v1	Duplodnaviria	Heunggongvirae	Uroviricota	Caudoviricetes			Arquatrovirinae	Caelumvirus	NA	Caelumvirus alvy	Streptomyces phage Alvy			CG	dsDNA
GCA_008945125.1_ASM894512v1	Duplodnaviria	Heunggongvirae	Uroviricota	Caudoviricetes				Lambovirus	NA	Gordonia virus Lambo	Gordonia phage Lambo			CG	dsDNA
GCA_008946225.1_ASM894622v1	Duplodnaviria	Heunggongvirae	Uroviricota	Caudoviricetes				Lambovirus	NA	Gordonia virus Ranch	Gordonia phage Ranch			CG	dsDNA
GCA_008946305.1_ASM894630v1	Duplodnaviria	Heunggongvirae	Uroviricota	Caudoviricetes		Casjensviridae		Sharonstreetvirus	NA	Sharonstreetvirus A18P4	Aeromonas phage vB_AhyS-A18P4			CG	dsDNA
GCA_008946405.1_ASM894640v1	Duplodnaviria	Heunggongvirae	Uroviricota	Caudoviricetes				Luchadorvirus	NA	Lucadorvirus jeeves	Mycobacterium phage Jeeves			CG	dsDNA
GCA_008947205.1_ASM894720v1	Duplodnaviria	Heunggongvirae	Uroviricota	Caudoviricetes			Gclasvirinae	Jolieduovirus	NA	Jolieduovirus mercurio	Mycobacterium phage Mercurio			CG	dsDNA
GCA_008951945.1_ASM895194v1	Duplodnaviria	Heunggongvirae	Uroviricota	Caudoviricetes		Chaseviridae	Cleopatravirinae	Myducvirus	NA	Myducvirus myduc	Proteus phage Myduc			CG	dsDNA
GCA_008952025.1_ASM895202v1	Duplodnaviria	Heunggongvirae	Uroviricota	Caudoviricetes				Macdonaldcampvirus	NA	Macdonaldcampvirus SB28	Salmonella phage vB_SenS_SB28			CG	dsDNA
GCA_009186365.1_ASM918636v1	Duplodnaviria	Heunggongvirae	Uroviricota	Caudoviricetes			Bclasvirinae	Lilmcdreamyvirus	NA	Lilmcdreamyvirus lilmcdreamy	Mycobacterium phage LilMcDreamy			CG	dsDNA
GCA_009186825.1_ASM918682v1	Duplodnaviria	Heunggongvirae	Uroviricota	Caudoviricetes			Deejayvirinae	Tanisvirus	NA	Tanisvirus tanis	Gordonia phage Tanis			CG	dsDNA
GCA_009187715.1_ASM918771v1	Duplodnaviria	Heunggongvirae	Uroviricota	Caudoviricetes		Zierdtviridae	Petrovskivirinae	Sukkupivirus	NA	Sukkupivirus nadinerae	Gordonia phage NadineRae			CG	dsDNA
GCA_009387965.1_ASM938796v1	Duplodnaviria	Heunggongvirae	Uroviricota	Caudoviricetes				Muldoonvirus	NA	Muldoonvirus muldoon	Serratia phage Muldoon			CG	dsDNA
GCA_009388065.1_ASM938806v1	Duplodnaviria	Heunggongvirae	Uroviricota	Caudoviricetes				Menderavirus	NA	Menderavirus mendera	Stenotrophomonas phage Mendera			CG	dsDNA
GCA_009388225.1_ASM938822v1	Duplodnaviria	Heunggongvirae	Uroviricota	Caudoviricetes				Menderavirus	NA	Menderavirus moby	Stenotrophomonas phage Moby			CG	dsDNA
GCA_009388345.1_ASM938834v1	Duplodnaviria	Heunggongvirae	Uroviricota	Caudoviricetes		Schitoviridae		Exceevirus	NA	Exceevirus Xc38	Acinetobacter phage VB_ApiP_XC38			CG	dsDNA
GCA_009388365.1_ASM938836v1	Duplodnaviria	Heunggongvirae	Uroviricota	Caudoviricetes		Schitoviridae		Penintadodekavirus	NA	Penintadodekavirus 5012	Vibrio phage phi50-12			CG	dsDNA
GCA_009388425.1_ASM938842v1	Duplodnaviria	Heunggongvirae	Uroviricota	Caudoviricetes			Kantovirinae	Beograduvirus	NA	Beograduvirus Xaf18	Xanthomonas virus phiXaf18			CG	dsDNA
GCA_009662515.1_ASM966251v1	Duplodnaviria	Heunggongvirae	Uroviricota	Caudoviricetes		Casjensviridae		Dunedinvirus	NA	Dunedinvirus JS26	Serratia phage JS26			CG	dsDNA
GCA_009662895.1_ASM966289v1	Duplodnaviria	Heunggongvirae	Uroviricota	Caudoviricetes		Casjensviridae		Lavrentievavirus	NA	Lavrentieva E21	Escherichia phage E21			CG	dsDNA
GCA_009662935.1_ASM966293v1	Duplodnaviria	Heunggongvirae	Uroviricota	Caudoviricetes		Drexlerviridae		Hicfunavirus	NA	Hicfunavirus HCF1	Citrobacter virus HCF1			CG	dsDNA
GCA_009667665.1_ASM966766v1	Duplodnaviria	Heunggongvirae	Uroviricota	Caudoviricetes		Casjensviridae		Phobosvirus	NA	Phobosvirus phobos	Bacteriophage Phobos			CG	dsDNA
GCA_009671745.1_ASM967174v1	Duplodnaviria	Heunggongvirae	Uroviricota	Caudoviricetes		Drexlerviridae	Braunvirinae	Veterinaerplatzvirus	NA	Veterinaerplatzvirus vv12210I	Escherichia phage vB_EcoS-12210I			CG	dsDNA
GCA_009672365.1_ASM967236v1	Duplodnaviria	Heunggongvirae	Uroviricota	Caudoviricetes				Kuleanavirus	NA	Arthrobacter virus Kuleana	Arthrobacter phage Kuleana			CG	dsDNA
GCA_009672745.1_ASM967274v1	Duplodnaviria	Heunggongvirae	Uroviricota	Caudoviricetes		Orlajensenviridae	Pelczarvirinae	Paopuvirus	NA	Paopuvirus kaijohn	Microbacterium phage Kaijohn			CG	dsDNA
GCA_009672845.1_ASM967284v1	Duplodnaviria	Heunggongvirae	Uroviricota	Caudoviricetes			Weiservirinae	Unicornvirus	NA	Unicornvirus bryler	Mycobacterium phage Bryler			CG	dsDNA
GCA_009673325.1_ASM967332v1	Duplodnaviria	Heunggongvirae	Uroviricota	Caudoviricetes		Salasmaviridae		Bundooravirus	NA	Bundooravirus PumA1	Bacillus phage vB_Bpu_PumA1			CG	dsDNA
GCA_009673345.1_ASM967334v1	Duplodnaviria	Heunggongvirae	Uroviricota	Caudoviricetes		Salasmaviridae		Bundooravirus	NA	Bundooravirus PumA2	Bacillus phage vB_Bpu_PumA2			CG	dsDNA
GCA_009673525.1_ASM967352v1	Duplodnaviria	Heunggongvirae	Uroviricota	Caudoviricetes			Bclasvirinae	Quesadillavirus	NA	Quesadillavirus quesadilla	Mycobacterium phage Quesadilla			CG	dsDNA
GCA_009686105.1_ASM968610v1	Duplodnaviria	Heunggongvirae	Uroviricota	Caudoviricetes			Deejayvirinae	Tanisvirus	NA	Tanisvirus avazak	Gordonia phage Avazak			CG	dsDNA
GCA_009686265.1_ASM968626v1	Duplodnaviria	Heunggongvirae	Uroviricota	Caudoviricetes				Yeceytrevirus	NA	Yeceytrevirus yecey3	Mycobacterium phage Yecey3			CG	dsDNA
GCA_009688005.1_ASM968800v1	Duplodnaviria	Heunggongvirae	Uroviricota	Caudoviricetes				Indlulamithivirus	NA	Indlulamithivirus indlulamithi	Mycobacterium phage Indlulamithi			CG	dsDNA
GCA_009688065.1_ASM968806v1	Duplodnaviria	Heunggongvirae	Uroviricota	Caudoviricetes			Deejayvirinae	Kenoshavirus	NA	Kenoshavirus crocheter	Gordonia phage Crocheter			CG	dsDNA
GCA_009688665.1_ASM968866v1	Duplodnaviria	Heunggongvirae	Uroviricota	Caudoviricetes				Leonardvirus	NA	Leonardvirus leonard	Gordonia phage Leonard			CG	dsDNA
GCA_009688685.1_ASM968868v1	Duplodnaviria	Heunggongvirae	Uroviricota	Caudoviricetes				Mufasoctovirus	NA	Arthrobacter virus Mufasa8	Arthrobacter phage Mufasa8			CG	dsDNA
GCA_009689145.1_ASM968914v1	Duplodnaviria	Heunggongvirae	Uroviricota	Caudoviricetes				Leonardvirus	NA	Leonardvirus emoore	Gordonia phage EMoore			CG	dsDNA
GCA_009689505.1_ASM968950v1	Duplodnaviria	Heunggongvirae	Uroviricota	Caudoviricetes		Orlajensenviridae	Pelczarvirinae	Paopuvirus	NA	Paopuvirus azizam	Microbacterium phage Azizam			CG	dsDNA
GCA_009730695.1_ASM973069v1	Duplodnaviria	Heunggongvirae	Uroviricota	Caudoviricetes				Shirahamavirus	NA	Shirahamavirus PTm1	Tenacibaculum phage PTm1			CG	dsDNA
GCA_009800445.1_ASM980044v1	Duplodnaviria	Heunggongvirae	Uroviricota	Caudoviricetes			Gorgonvirinae	Aphroditevirus	NA	Aphroditevirus PDCC1	Photobacterium phage PDCC-1			CG	dsDNA
GCA_009800465.1_ASM980046v1	Duplodnaviria	Heunggongvirae	Uroviricota	Caudoviricetes			Vequintavirinae	Henunavirus	NA	Henunavirus hena1	Erwinia phage Hena1			CG	dsDNA
GCA_009800485.1_ASM980048v1	Duplodnaviria	Heunggongvirae	Uroviricota	Caudoviricetes				Klausavirus	NA	Klausavirus dryang	Arthrobacter phage DrYang			CG	dsDNA
GCA_009800865.1_ASM980086v1	Duplodnaviria	Heunggongvirae	Uroviricota	Caudoviricetes		Straboviridae	Twarogvirinae	Lazarusvirus	NA	Lazarusvirus berthold	Acinetobacter phage vB_AbaM_Berthold			CG	dsDNA
GCA_009800885.1_ASM980088v1	Duplodnaviria	Heunggongvirae	Uroviricota	Caudoviricetes		Straboviridae	Twarogvirinae	Lazarusvirus	NA	Lazarusvirus apostate	Acinetobacter phage vB_AbaM_Apostate			CG	dsDNA
GCA_009800905.1_ASM980090v1	Duplodnaviria	Heunggongvirae	Uroviricota	Caudoviricetes		Ackermannviridae		Kujavirus	NA	Kujavirus kuja	Vibrio phage vB_VchM_Kuja			CG	dsDNA
GCA_009828375.1_ASM982837v1	Duplodnaviria	Heunggongvirae	Uroviricota	Caudoviricetes		Schitoviridae		Cbunavirus	NA	Cbunavirus A41	Pectobacterium phage phiA41			CG	dsDNA
GCA_009859635.1_ASM985963v1	Duplodnaviria	Heunggongvirae	Uroviricota	Caudoviricetes				Skatevirus	NA	Skatevirus BS5	Salmonella phage VB_StyS_BS5			CG	dsDNA
GCA_009860175.1_ASM986017v1	Duplodnaviria	Heunggongvirae	Uroviricota	Caudoviricetes			Bclasvirinae	Birdsnestvirus	NA	Birdsnestvirus birdsNest	Mycobacterium phage BirdsNest			CG	dsDNA
GCA_009860215.1_ASM986021v1	Duplodnaviria	Heunggongvirae	Uroviricota	Caudoviricetes			Bclasvirinae	Imvubuvirus	NA	Imvubuvirus imvubu	Mycobacterium phage Imvubu			CG	dsDNA
GCA_009860315.1_ASM986031v1	Duplodnaviria	Heunggongvirae	Uroviricota	Caudoviricetes		Winoviridae		Pippivirus	NA	Pippivirus lotta	Flavobacterium_phage_vB_FspM_lotta8-1			CG	dsDNA
GCA_009860355.1_ASM986035v1	Duplodnaviria	Heunggongvirae	Uroviricota	Caudoviricetes		Winoviridae		Pippivirus	NA	Pippivirus pippi	Flavobacterium_phage_vB_FspM_pippi8-1			CG	dsDNA
GCA_009860375.1_ASM986037v1	Duplodnaviria	Heunggongvirae	Uroviricota	Caudoviricetes				Muminvirus	NA	Flavobacterium virus Filifjonk	vB_FspS_filifjonk9-1			CG	dsDNA
GCA_009860395.1_ASM986039v1	Duplodnaviria	Heunggongvirae	Uroviricota	Caudoviricetes				Hattifnattvirus	NA	Hattifnattvirus hattifnatt	vB_FspS_hattifnatt9-1			CG	dsDNA
GCA_009860415.1_ASM986041v1	Duplodnaviria	Heunggongvirae	Uroviricota	Caudoviricetes				Lillamyvirus	NA	Flavobacterium virus Hemulen	vB_FspS_hemulen6-1			CG	dsDNA
GCA_009860475.1_ASM986047v1	Duplodnaviria	Heunggongvirae	Uroviricota	Caudoviricetes		Duneviridae		Labanvirus	NA	Labanvirus laban	Flavobacterium_phage_vB_FspS_laban6-1			CG	dsDNA
GCA_009860495.1_ASM986049v1	Duplodnaviria	Heunggongvirae	Uroviricota	Caudoviricetes				Lillamyvirus	NA	Flavobacterium virus Lillamy	vB_FspS_lillamy9-1			CG	dsDNA
GCA_009860635.1_ASM986063v1	Duplodnaviria	Heunggongvirae	Uroviricota	Caudoviricetes				Lillamyvirus	NA	Flavobacterium virus Morran	vB_FspS_morran9-1			CG	dsDNA
GCA_009860735.1_ASM986073v1	Duplodnaviria	Heunggongvirae	Uroviricota	Caudoviricetes				Muminvirus	NA	Flavobacterium virus Mumin	vB_FspS_mumin9-1			CG	dsDNA
GCA_009860795.1_ASM986079v1	Duplodnaviria	Heunggongvirae	Uroviricota	Caudoviricetes				Muminvirus	NA	Flavobacterium virus Mymlan	vB_FspS_mymlan6-1			CG	dsDNA
GCA_009861045.1_ASM986104v1	Duplodnaviria	Heunggongvirae	Uroviricota	Caudoviricetes				Tantvirus	NA	Flavobacterium virus Tant	vB_FspS_tant8-1			CG	dsDNA
GCA_009909565.1_ASM990956v1	Duplodnaviria	Heunggongvirae	Uroviricota	Caudoviricetes		Casjensviridae		Newforgelanevirus	NA	Newforgelanevirus MA12	Pectobacterium phage MA12			CG	dsDNA
GCA_009931845.1_ASM993184v1	Duplodnaviria	Heunggongvirae	Uroviricota	Caudoviricetes		Straboviridae	Twarogvirinae	Hadassahvirus	NA	Hadassahvirus pht2	Acinetobacter phage vB_AbaM_PhT2			CG	dsDNA
GCA_009932005.1_ASM993200v1	Duplodnaviria	Heunggongvirae	Uroviricota	Caudoviricetes		Salasmaviridae	Tatarstanvirinae	Gaunavirus	NA	Gaunavirus SRT01hs	Bacillus virus SRT01hs			CG	dsDNA
GCA_009932015.2_ASM993201v2	Duplodnaviria	Heunggongvirae	Uroviricota	Caudoviricetes				Arawnvirus	NA	Arawnvirus arawn	Butyrivibrio phage Arawn			CG	dsDNA
GCA_010120085.1_ASM1012008v1	Duplodnaviria	Heunggongvirae	Uroviricota	Caudoviricetes		Drexlerviridae	Tempevirinae	Hanrivervirus	NA	Hanrivervirus aalborv	Escherichia phage aalborv			CG	dsDNA
GCA_010120095.1_ASM1012009v1	Duplodnaviria	Heunggongvirae	Uroviricota	Caudoviricetes		Drexlerviridae	Tempevirinae	Hanrivervirus	NA	Hanrivervirus aaroes	Escherichia phage aaroes			CG	dsDNA
GCA_010120125.1_ASM1012012v1	Duplodnaviria	Heunggongvirae	Uroviricota	Caudoviricetes		Kwiatkowskiviridae	Stephanstirmvirinae	Justusliebigvirus	NA	Justusliebigvirus alia	Escherichia phage alia			CG	dsDNA
GCA_010120185.1_ASM1012018v1	Duplodnaviria	Heunggongvirae	Uroviricota	Caudoviricetes		Drexlerviridae	Tempevirinae	Warwickvirus	NA	Warwickvirus atuna	Escherichia phage atuna			CG	dsDNA
GCA_010120295.1_ASM1012029v1	Duplodnaviria	Heunggongvirae	Uroviricota	Caudoviricetes		Chaseviridae	Cleopatravirinae	Carltongylesvirus	NA	Carltongylesvirus flopper	Escherichia phage flopper			CG	dsDNA
GCA_010120775.1_ASM1012077v1	Duplodnaviria	Heunggongvirae	Uroviricota	Caudoviricetes		Kwiatkowskiviridae	Stephanstirmvirinae	Justusliebigvirus	NA	Justusliebigvirus muut	Escherichia phage muut			CG	dsDNA
GCA_010238265.1_ASM1023826v1	Duplodnaviria	Heunggongvirae	Uroviricota	Caudoviricetes		Straboviridae	Tevenvirinae	Kanagawavirus	NA	Kanagawavirus cipnine	Enterobacter phage vB_EclM_CIP9			CG	dsDNA
GCA_010594855.1_ASM1059485v1	Duplodnaviria	Heunggongvirae	Uroviricota	Caudoviricetes			Azeredovirinae	Dubowvirus	NA	Dubowvirus baqsau1	Staphylococcus phage Baq_Sau1			CG	dsDNA
GCA_010706295.1_ASM1070629v1	Duplodnaviria	Heunggongvirae	Uroviricota	Caudoviricetes				Myoalterovirus	NA	Myoalterovirus PT11V22	vB_AmeM_PT11-V22	V22		CG	dsDNA
GCA_010706305.1_ASM1070630v1	Duplodnaviria	Heunggongvirae	Uroviricota	Caudoviricetes			Beephvirinae	Manuelvirus	NA	Manuelvirus JXY1	Streptomyces phage JXY1			CG	dsDNA
GCA_011022365.1_ASM1102236v1	Duplodnaviria	Heunggongvirae	Uroviricota	Caudoviricetes				Ceduovirus	NA	Ceduovirus bIBB14	Lactococcus phage vB_LLc_bIBB14			CG	dsDNA
GCA_011064345.1_ASM1106434v1	Duplodnaviria	Heunggongvirae	Uroviricota	Caudoviricetes				Badaztecvirus	NA	Badaztecvirus badaargau2	Bifidobacterium phage BadAargau2			CG	dsDNA
GCA_011064355.1_ASM1106435v1	Duplodnaviria	Heunggongvirae	Uroviricota	Caudoviricetes				Badaztecvirus	NA	Badaztecvirus badaztec1	Bifidobacterium phage BadAztec1			CG	dsDNA
GCA_011067295.1_ASM1106729v1	Duplodnaviria	Heunggongvirae	Uroviricota	Caudoviricetes		Casjensviridae		Maxdohrnvirus	NA	Maxdohrnvirus SS2019XI	Pseudomonas phage vB_Pae-SS2019XI			CG	dsDNA
GCA_011067365.1_ASM1106736v1	Duplodnaviria	Heunggongvirae	Uroviricota	Caudoviricetes				Skogvirus	NA	Skogvirus Skog	Gordonia phage Skog			CG	dsDNA
GCA_011067465.1_ASM1106746v1	Duplodnaviria	Heunggongvirae	Uroviricota	Caudoviricetes			Gracegardnervirinae	Cornievirus	NA	Mycobacterium virus Cornie	Mycobacterium phage Cornie			CG	dsDNA
GCA_011067505.1_ASM1106750v1	Duplodnaviria	Heunggongvirae	Uroviricota	Caudoviricetes			Weiservirinae	Fionnbharthvirus	NA	Fionnbharthvirus eponine	Mycobacterium phage Eponine			CG	dsDNA
GCA_011106535.1_ASM1110653v1	Duplodnaviria	Heunggongvirae	Uroviricota	Caudoviricetes		Peduoviridae		Yongunavirus	NA	Yongunavirus yong1	Vibrio phage vB_ValM-yong1			CG	dsDNA
GCA_011756555.1_ASM1175655v1	Duplodnaviria	Heunggongvirae	Uroviricota	Caudoviricetes				Ayohtrevirus	NA	Ayohtrevirus abba	Arthrobacter phage Abba			CG	dsDNA
GCA_011756565.1_ASM1175656v1	Duplodnaviria	Heunggongvirae	Uroviricota	Caudoviricetes				Burrovirus	NA	Burrovirus arete	Microbacterium phage Arete			CG	dsDNA
GCA_011756615.1_ASM1175661v1	Duplodnaviria	Heunggongvirae	Uroviricota	Caudoviricetes				Ruthyvirus	NA	Gordonia virus DumpsterDude	Gordonia phage DumpsterDude			CG	dsDNA
GCA_011756725.1_ASM1175672v1	Duplodnaviria	Heunggongvirae	Uroviricota	Caudoviricetes				Astrithrvirus	NA	Astrithrvirus astrithr	Salmonella phage astrithr			CG	dsDNA
GCA_011756775.1_ASM1175677v1	Duplodnaviria	Heunggongvirae	Uroviricota	Caudoviricetes				Rosemountvirus	NA	Rosemountvirus birk	Salmonella phage birk			CG	dsDNA
GCA_011897435.1_ASM1189743v1	Duplodnaviria	Heunggongvirae	Uroviricota	Caudoviricetes		Mesyanzhinovviridae	Bradleyvirinae	Epaquintavirus	NA	Epaquintavirus Epa5	Pseudomonas phage Epa5			CG	dsDNA
GCA_011899895.1_ASM1189989v1	Duplodnaviria	Heunggongvirae	Uroviricota	Caudoviricetes			Andrewesvirinae	Vipetofemvirus	NA	Vipetofemvirus nattely	Enterococcus phage nattely			CG	dsDNA
GCA_011899945.1_ASM1189994v1	Duplodnaviria	Heunggongvirae	Uroviricota	Caudoviricetes			Andrewesvirinae	Vipetofemvirus	NA	Vipetofemvirus vipetofem	Enterococus phage vipetofem			CG	dsDNA
GCA_012163105.1_ASM1216310v1	Duplodnaviria	Heunggongvirae	Uroviricota	Caudoviricetes		Chaseviridae	Cleopatravirinae	Loessnervirus	NA	Loessnervirus SSEM1	Pantoea phage vB_PagM_SSEM1			CG	dsDNA
GCA_012360595.1_ASM1236059v1	Duplodnaviria	Heunggongvirae	Uroviricota	Caudoviricetes				Lastavirus	NA	Lastavirus lasta	Klebsiella phage LASTA			CG	dsDNA
GCA_012593925.1_ASM1259392v1	Duplodnaviria	Heunggongvirae	Uroviricota	Caudoviricetes		Chaseviridae	Cleopatravirinae	Vlaamsbrabantvirus	NA	Phage 278	Myoviridae sp. isolate 278			PG	dsDNA
GCA_012933845.1_ASM1293384v1	Duplodnaviria	Heunggongvirae	Uroviricota	Caudoviricetes			Eekayvirinae	Akonivirus	NA	Akonivirus phedro	Microbacterium phage Phedro			CG	dsDNA
GCA_012933935.1_ASM1293393v1	Duplodnaviria	Heunggongvirae	Uroviricota	Caudoviricetes			Deejayvirinae	Secretariatvirus	NA	Secretariatvirus secretariat	Gordonia phage Secretariat			CG	dsDNA
GCA_012979645.1_ASM1297964v1	Duplodnaviria	Heunggongvirae	Uroviricota	Caudoviricetes		Casjensviridae		Jacunavirus	NA	Jacunavirus JC01	Cronobacter phage JC01			CG	dsDNA
GCA_013084985.1_ASM1308498v1	Duplodnaviria	Heunggongvirae	Uroviricota	Caudoviricetes				Rosariovirus	NA	Rosariovirus Weirdo19ES	Mycobacterium phage Weirdo19			CG	dsDNA
GCA_013215495.1_ASM1321549v1	Duplodnaviria	Heunggongvirae	Uroviricota	Caudoviricetes			Queuovirinae	Amoyvirus	NA	Amoyvirus R7M	vB_AcoS-R7M	R7M		CG	dsDNA
GCA_013284075.1_ASM1328407v1	Duplodnaviria	Heunggongvirae	Uroviricota	Caudoviricetes				Agmunavirus	NA	Agmunavirus AGM1	Brevibacterium phage AGM1			CG	dsDNA
GCA_013306735.1_ASM1330673v1	Duplodnaviria	Heunggongvirae	Uroviricota	Caudoviricetes		Casjensviridae		Zhonglingvirus	NA	Zhonglingvirus SAP012	Salmonella phage SAP012			CG	dsDNA
GCA_013348135.1_ASM1334813v1	Duplodnaviria	Heunggongvirae	Uroviricota	Caudoviricetes		Salasmaviridae	Picovirinae	Salasvirus	NA	Salasvirus Gxv1	Bacillus phage Gxv1			CG	dsDNA
GCA_013354345.1_ASM1335434v1	Duplodnaviria	Heunggongvirae	Uroviricota	Caudoviricetes			Ruthgordonvirinae	Vendettavirus	NA	Vendettavirus tzgordon	Gordonia phage TZGordon			CG	dsDNA
GCA_013354555.1_ASM1335455v1	Duplodnaviria	Heunggongvirae	Uroviricota	Caudoviricetes				Timshelvirus	NA	Timshelvirus droogsarmy	Mycobacterium phage DroogsArmy			CG	dsDNA
GCA_013363035.1_ASM1336303v1	Duplodnaviria	Heunggongvirae	Uroviricota	Caudoviricetes				Saintgironsvirus	NA	Saintgironsvirus LE1	Leptospira phage LE1			CG	dsDNA
GCA_013375085.2_ASM1337508v1	Duplodnaviria	Heunggongvirae	Uroviricota	Caudoviricetes		Chaseviridae	Cleopatravirinae	Sabourvirus	NA	Sabourvirus sv4HA13	Escherichia phage vB_EcoM_4HA13			CG	dsDNA
GCA_013375135.1_ASM1337513v1	Duplodnaviria	Heunggongvirae	Uroviricota	Caudoviricetes			Trabyvirinae	Slepowronvirus	NA	Slepowronvirus LPHM00113468	Listeria phage LP-HM00113468			CG	dsDNA
GCA_013387685.1_ASM1338768v1	Duplodnaviria	Heunggongvirae	Uroviricota	Caudoviricetes	Crassvirales	Steigviridae	Asinivirinae	Wulfhauvirus	NA	Wulfhauvirus bangladeshii	Bacteroides phage DAC15			CG	dsDNA
GCA_013388005.1_ASM1338800v1	Duplodnaviria	Heunggongvirae	Uroviricota	Caudoviricetes				Zitchvirus	NA	Zitchvirus zitch	Gordonia phage Zitch			CG	dsDNA
GCA_013415945.1_ASM1341594v1	Duplodnaviria	Heunggongvirae	Uroviricota	Caudoviricetes		Drexlerviridae		Jhansiroadvirus	NA	Jhansiroadvirus gwaliVC1	Vibrio phage VC1			CG	dsDNA
GCA_013426305.1_ASM1342630v1	Duplodnaviria	Heunggongvirae	Uroviricota	Caudoviricetes				Elemovirus	NA	Elemovirus elemoA	Flavobacterium phage vB_FspP_elemoA_7-9A			CG	dsDNA
GCA_013426425.1_ASM1342642v1	Duplodnaviria	Heunggongvirae	Uroviricota	Caudoviricetes		Orlajensenviridae	Pelczarvirinae	Paopuvirus	NA	Paopuvirus bri160	Microbacterium phage Bri160			CG	dsDNA
GCA_013426465.1_ASM1342646v1	Duplodnaviria	Heunggongvirae	Uroviricota	Caudoviricetes				Luchadorvirus	NA	Lucadorvirus gail	Mycobacterium phage Gail			CG	dsDNA
GCA_013490925.1_ASM1349092v1	Duplodnaviria	Heunggongvirae	Uroviricota	Caudoviricetes		Autographiviridae	Studiervirinae	Warsawvirus	NA	Warsawvirus 3MF5	Pseudomonas phage vB_PsyP_3MF5			CG	dsDNA
GCA_014071165.1_ASM1407116v1	Duplodnaviria	Heunggongvirae	Uroviricota	Caudoviricetes				Harrisonburgvirus	NA	Harrisonburgvirus persinger	Pseudomonas phage Persinger			CG	dsDNA
GCA_014071225.1_ASM1407122v1	Duplodnaviria	Heunggongvirae	Uroviricota	Caudoviricetes		Peduoviridae		Valbvirus	NA	Valbvirus ValB1MD2	Vibrio phage ValB1MD-2			CG	dsDNA
GCA_014071275.1_ASM1407127v1	Duplodnaviria	Heunggongvirae	Uroviricota	Caudoviricetes			Brucestockervirinae	Serpukhovskyvirus	NA	Serpukhovskyvirus KpV2811	Klebsiella virus KpV2811			CG	dsDNA
GCA_014183385.1_ASM1418338v1	Duplodnaviria	Heunggongvirae	Uroviricota	Caudoviricetes		Casjensviridae		Redjacvirus	NA	Redjacvirus piberecoleta	Providencia phage vB_PreS-PibeRecoleta			CG	dsDNA
GCA_014183395.1_ASM1418339v1	Duplodnaviria	Heunggongvirae	Uroviricota	Caudoviricetes		Casjensviridae		Redjacvirus	NA	Redjacvirus stilesk	Providencia phage vB_PreS-Stilesk			CG	dsDNA
GCA_014262575.1_ASM1426257v1	Duplodnaviria	Heunggongvirae	Uroviricota	Caudoviricetes				Bakolyvirus	NA	Bakolyvirus bakoly	Ralstonia phage Bakoly	Bakoly		CG	dsDNA
GCA_014262615.1_ASM1426261v1	Duplodnaviria	Heunggongvirae	Uroviricota	Caudoviricetes				Bakolyvirus	NA	Bakolyvirus simangalove	Ralstonia phage Simangalove	Simangalove		CG	dsDNA
GCA_014262805.1_ASM1426280v1	Duplodnaviria	Heunggongvirae	Uroviricota	Caudoviricetes				Rahariannevirus	NA	Rahariannevirus raharianne	Ralstonia phage Raharianne	Raharianne		CG	dsDNA
GCA_014262885.1_ASM1426288v1	Duplodnaviria	Heunggongvirae	Uroviricota	Caudoviricetes		Autographiviridae		Anchaingvirus	NA	Anchaingvirus anchaing	Ralstonia phage Anchaing	Anchaing		CG	dsDNA
GCA_014262965.2_ASM1426296v2	Duplodnaviria	Heunggongvirae	Uroviricota	Caudoviricetes				Cimandefvirus	NA	Cimandefvirus cimandef	Ralstonia phage Cimandef	Cimandef		CG	dsDNA
GCA_014263015.2_ASM1426301v2	Duplodnaviria	Heunggongvirae	Uroviricota	Caudoviricetes				Gervaisevirus	NA	Gervaisevirus claudettte	Ralstonia phage Claudette	Claudette		CG	dsDNA
GCA_014263095.1_ASM1426309v1	Duplodnaviria	Heunggongvirae	Uroviricota	Caudoviricetes				Cimandefvirus	NA	Cimandefvirus eline	Ralstonia phage Eline	Eline		CG	dsDNA
GCA_014263175.1_ASM1426317v1	Duplodnaviria	Heunggongvirae	Uroviricota	Caudoviricetes				Firingavirus	NA	Firingavirus firinga	Ralstonia phage Firinga	Firinga		CG	dsDNA
GCA_014263205.2_ASM1426320v2	Duplodnaviria	Heunggongvirae	Uroviricota	Caudoviricetes				Cimandefvirus	NA	Cimandefvirus gamede	Ralstonia phage Gamede	Gamede		CG	dsDNA
GCA_014263265.1_ASM1426326v1	Duplodnaviria	Heunggongvirae	Uroviricota	Caudoviricetes				Gervaisevirus	NA	Gervaisevirus gervaise	Ralstonia phage Gervaise	Gervaise		CG	dsDNA
GCA_014263305.1_ASM1426330v1	Duplodnaviria	Heunggongvirae	Uroviricota	Caudoviricetes				Dinavirus	NA	Dinavirus dina	Ralstonia phage Dina	Dina		CG	dsDNA
GCA_014337575.1_ASM1433757v1	Duplodnaviria	Heunggongvirae	Uroviricota	Caudoviricetes		Vilmaviridae	Mclasvirinae	Reyvirus	NA	Reyvirus aziz	Mycobacterium phage Aziz			CG	dsDNA
GCA_014337595.1_ASM1433759v1	Duplodnaviria	Heunggongvirae	Uroviricota	Caudoviricetes		Vilmaviridae	Mclasvirinae	Bongovirus	NA	Bongovirus reindeer	Mycobacterium phage Reindeer			CG	dsDNA
GCA_014337735.1_ASM1433773v1	Duplodnaviria	Heunggongvirae	Uroviricota	Caudoviricetes				Jujuvirus	NA	Jujuvirus azula	Gordonia phage Azula			CG	dsDNA
GCA_014488745.1_ASM1448874v1	Duplodnaviria	Heunggongvirae	Uroviricota	Caudoviricetes		Peduoviridae		Kisquattuordecimvirus	NA	Kisquattuordecimvirus FLC5	Burkholderia phage FLC5 DNA			CG	dsDNA
GCA_014488905.1_ASM1448890v1	Duplodnaviria	Heunggongvirae	Uroviricota	Caudoviricetes		Vilmaviridae	Mclasvirinae	Reyvirus	NA	Reyvirus estes	Mycobacterium phage Estes			CG	dsDNA
GCA_014518225.1_ASM1451822v1	Duplodnaviria	Heunggongvirae	Uroviricota	Caudoviricetes		Vilmaviridae	Lclasvirinae	Faithunavirus	NA	Faithunavirus CELFI	Mycobacterium phage CELFI			CG	dsDNA
GCA_014518245.1_ASM1451824v1	Varidnaviria	Helvetiavirae	Dividoviricota	Laserviricetes	Halopanivirales	Simuloviridae		Yingchengvirus	NA	Yingchengvirus HJIV1	Haloterrigena jeotgali icosahedral virus 1	HJIV1		CG	dsDNA
GCA_014518255.1_ASM1451825v1	Varidnaviria	Helvetiavirae	Dividoviricota	Laserviricetes	Halopanivirales	Simuloviridae		Yingchengvirus	NA	Yingchengvirus NVIV1	Natrinema versiforme icosahedral virus 1	NVIV1		CG	dsDNA
GCA_014824285.1_ASM1482428v1	Duplodnaviria	Heunggongvirae	Uroviricota	Caudoviricetes		Rountreeviridae	Sarlesvirinae	Copernicusvirus	NA	Copernicusvirus AE417	Enterococcus phage AE4_17			CG	dsDNA
GCA_014824375.1_ASM1482437v1	Duplodnaviria	Heunggongvirae	Uroviricota	Caudoviricetes				Archimedesvirus	NA	Archimedesvirus archimedes	Gordonia phage Archimedes			CG	dsDNA
GCA_014824445.1_ASM1482444v1	Duplodnaviria	Heunggongvirae	Uroviricota	Caudoviricetes				Clownvirus	NA	Clownvirus clown	Gordonia phage Clown			CG	dsDNA
GCA_014824535.1_ASM1482453v1	Duplodnaviria	Heunggongvirae	Uroviricota	Caudoviricetes			Andrewesvirinae	Denvervirus	NA	Denvervirus dv9183	Enterococcus phage 9183			CG	dsDNA
GCA_014857005.1_ASM1485700v1	Duplodnaviria	Heunggongvirae	Uroviricota	Caudoviricetes				Manovirus	NA	Manovirus Mano	Achromobacter phage Mano			CG	dsDNA
GCA_014892765.1_ASM1489276v1	Duplodnaviria	Heunggongvirae	Uroviricota	Caudoviricetes		Casjensviridae		Sharonstreetvirus	NA	Sharonstreetvirus BUCT551	Aeromonas phage BUCT551			CG	dsDNA
GCA_015160935.1_ASM1516093v1	Duplodnaviria	Heunggongvirae	Uroviricota	Caudoviricetes	Crassvirales	Suoliviridae	Boorivirinae	Cohcovirus	NA	Cohcovirus hiberniae	uncultured phage cr50_1			CG	dsDNA
GCA_015160945.1_ASM1516094v1	Duplodnaviria	Heunggongvirae	Uroviricota	Caudoviricetes	Crassvirales	Suoliviridae	Boorivirinae	Culoivirus	NA	Culoivirus intestinalis	uncultured phage cr55_1			CG	dsDNA
GCA_015160955.1_ASM1516095v1	Duplodnaviria	Heunggongvirae	Uroviricota	Caudoviricetes	Crassvirales	Intestiviridae	Churivirinae	Jahgtovirus	NA	Jahgtovirus intestinihominis	uncultured phage cr107_1			CG	dsDNA
GCA_015160965.1_ASM1516096v1	Duplodnaviria	Heunggongvirae	Uroviricota	Caudoviricetes	Crassvirales	Steigviridae	Asinivirinae	Mahstovirus	NA	Mahstovirus faecalis	uncultured phage cr106_1			CG	dsDNA
GCA_015160975.1_ASM1516097v1	Duplodnaviria	Heunggongvirae	Uroviricota	Caudoviricetes	Crassvirales	Suoliviridae	Uncouvirinae	Besingivirus	NA	Besingivirus coli	uncultured phage cr118_1			CG	dsDNA
GCA_015160985.1_ASM1516098v1	Duplodnaviria	Heunggongvirae	Uroviricota	Caudoviricetes	Crassvirales	Suoliviridae	Boorivirinae	Culoivirus	NA	Culoivirus americanus	uncultured phage cr1_1			CG	dsDNA
GCA_015160995.1_ASM1516099v1	Duplodnaviria	Heunggongvirae	Uroviricota	Caudoviricetes	Crassvirales	Intestiviridae	Crudevirinae	Diorhovirus	NA	Diorhovirus intestinalis	uncultured phage cr3_1			CG	dsDNA
GCA_015161005.1_ASM1516100v1	Duplodnaviria	Heunggongvirae	Uroviricota	Caudoviricetes	Crassvirales	Suoliviridae	Boorivirinae	Canhaevirus	NA	Canhaevirus hiberniae	uncultured phage cr10_1			CG	dsDNA
GCA_015161015.1_ASM1516101v1	Duplodnaviria	Heunggongvirae	Uroviricota	Caudoviricetes	Crassvirales	Intestiviridae	Crudevirinae	Delmidovirus	NA	Delmidovirus splanchnicus	uncultured phage cr11_1			CG	dsDNA
GCA_015161025.1_ASM1516102v1	Duplodnaviria	Heunggongvirae	Uroviricota	Caudoviricetes	Crassvirales	Intestiviridae	Obtuvirinae	Fohxhuevirus	NA	Fohxhuevirus gastrointestinalis	uncultured phage cr8_1			CG	dsDNA
GCA_015161035.1_ASM1516103v1	Duplodnaviria	Heunggongvirae	Uroviricota	Caudoviricetes	Crassvirales	Steigviridae	Asinivirinae	Pipoluvirus	NA	Pipoluvirus rarus	uncultured phage cr108_1			CG	dsDNA
GCA_015161045.1_ASM1516104v1	Duplodnaviria	Heunggongvirae	Uroviricota	Caudoviricetes	Crassvirales	Intestiviridae	Crudevirinae	Delmidovirus	NA	Delmidovirus intestinihominis	uncultured phage cr110_1			CG	dsDNA
GCA_015161055.1_ASM1516105v1	Duplodnaviria	Heunggongvirae	Uroviricota	Caudoviricetes	Crassvirales	Steigviridae	Asinivirinae	Lahndsivirus	NA	Lahndsivirus rarus	uncultured phage cr111_1			CG	dsDNA
GCA_015161065.1_ASM1516106v1	Duplodnaviria	Heunggongvirae	Uroviricota	Caudoviricetes	Crassvirales	Steigviridae	Asinivirinae	Kehishuvirus	NA	Kehishuvirus splanchnicus	uncultured phage cr112_1			CG	dsDNA
GCA_015161075.1_ASM1516107v1	Duplodnaviria	Heunggongvirae	Uroviricota	Caudoviricetes	Crassvirales	Steigviridae	Asinivirinae	Pamirivirus	NA	Pamirivirus faecium	uncultured phage cr116_1			CG	dsDNA
GCA_015161085.1_ASM1516108v1	Duplodnaviria	Heunggongvirae	Uroviricota	Caudoviricetes	Crassvirales	Steigviridae	Asinivirinae	Kahnovirus	NA	Kahnovirus oralis	uncultured phage cr85_1			CG	dsDNA
GCA_015161095.1_ASM1516109v1	Duplodnaviria	Heunggongvirae	Uroviricota	Caudoviricetes	Crassvirales	Steigviridae	Asinivirinae	Kolpuevirus	NA	Kolpuevirus hominis	uncultured phage cr126_1			CG	dsDNA
GCA_015161105.1_ASM1516110v1	Duplodnaviria	Heunggongvirae	Uroviricota	Caudoviricetes	Crassvirales	Steigviridae	Asinivirinae	Mahlunavirus	NA	Mahlunavirus rarus	uncultured phage cr128_1			CG	dsDNA
GCA_015161115.1_ASM1516111v1	Duplodnaviria	Heunggongvirae	Uroviricota	Caudoviricetes	Crassvirales	Crevaviridae	Doltivirinae	Kahucivirus	NA	Kahucivirus intestinalis	uncultured phage cr127_1			CG	dsDNA
GCA_015161125.1_ASM1516112v1	Duplodnaviria	Heunggongvirae	Uroviricota	Caudoviricetes	Crassvirales	Intestiviridae	Obtuvirinae	Hacihdavirus	NA	Hacihdavirus animalis	uncultured phage cr271_1			CG	dsDNA
GCA_015161135.1_ASM1516113v1	Duplodnaviria	Heunggongvirae	Uroviricota	Caudoviricetes	Crassvirales	Suoliviridae	Loutivirinae	Buchavirus	NA	Buchavirus copri	uncultured phage cr52_1			CG	dsDNA
GCA_015161145.1_ASM1516114v1	Duplodnaviria	Heunggongvirae	Uroviricota	Caudoviricetes	Crassvirales	Suoliviridae	Loutivirinae	Blohavirus	NA	Blohavirus americanus	uncultured phage cr53_1			CG	dsDNA
GCA_015161155.1_ASM1516115v1	Duplodnaviria	Heunggongvirae	Uroviricota	Caudoviricetes	Crassvirales	Suoliviridae	Loutivirinae	Buchavirus	NA	Buchavirus faecalis	uncultured phage cr56_1			CG	dsDNA
GCA_015161185.1_ASM1516118v1	Duplodnaviria	Heunggongvirae	Uroviricota	Caudoviricetes	Crassvirales	Suoliviridae	Loutivirinae	Buorbuivirus	NA	Buorbuivirus hominis	uncultured phage cr4_1			CG	dsDNA
GCA_015161195.1_ASM1516119v1	Duplodnaviria	Heunggongvirae	Uroviricota	Caudoviricetes	Crassvirales	Suoliviridae	Bearivirinae	Afonbuvirus	NA	Afonbuvirus faecalis	uncultured phage cr6_1			CG	dsDNA
GCA_015161205.1_ASM1516120v1	Duplodnaviria	Heunggongvirae	Uroviricota	Caudoviricetes	Crassvirales	Suoliviridae	Oafivirinae	Burzaovirus	NA	Burzaovirus coli	uncultured phage cr7_1			CG	dsDNA
GCA_015161215.1_ASM1516121v1	Duplodnaviria	Heunggongvirae	Uroviricota	Caudoviricetes	Crassvirales	Suoliviridae	Loutivirinae	Buchavirus	NA	Buchavirus coli	uncultured phage cr113_1			CG	dsDNA
GCA_015161225.1_ASM1516122v1	Duplodnaviria	Heunggongvirae	Uroviricota	Caudoviricetes	Crassvirales	Suoliviridae	Uncouvirinae	Aurodevirus	NA	Aurodevirus intestinalis	uncultured phage cr114_1			CG	dsDNA
GCA_015161235.1_ASM1516123v1	Duplodnaviria	Heunggongvirae	Uroviricota	Caudoviricetes	Crassvirales	Suoliviridae	Uncouvirinae	Birpovirus	NA	Birpovirus hiberniae	uncultured phage cr115_1			CG	dsDNA
GCA_015161245.1_ASM1516124v1	Duplodnaviria	Heunggongvirae	Uroviricota	Caudoviricetes	Crassvirales	Suoliviridae	Oafivirinae	Burzaovirus	NA	Burzaovirus faecalis	uncultured phage cr124_1			CG	dsDNA
GCA_015161255.1_ASM1516125v1	Duplodnaviria	Heunggongvirae	Uroviricota	Caudoviricetes	Crassvirales	Suoliviridae	Uncouvirinae	Aurodevirus	NA	Aurodevirus hominis	uncultured phage cr125_1			CG	dsDNA
GCA_015161265.1_ASM1516126v1	Duplodnaviria	Heunggongvirae	Uroviricota	Caudoviricetes	Crassvirales	Suoliviridae	Oafivirinae	Chuhaivirus	NA	Chuhaivirus simiae	uncultured phage cr130_1			CG	dsDNA
GCA_015161275.1_ASM1516127v1	Duplodnaviria	Heunggongvirae	Uroviricota	Caudoviricetes	Crassvirales	Suoliviridae	Oafivirinae	Cacepaovirus	NA	Cacepaovirus simiae	uncultured phage cr131_1			CG	dsDNA
GCA_015161285.1_ASM1516128v1	Duplodnaviria	Heunggongvirae	Uroviricota	Caudoviricetes	Crassvirales	Suoliviridae	Oafivirinae	Buhlduvirus	NA	Buhlduvirus porcinus	uncultured phage cr272_1			CG	dsDNA
GCA_015161295.1_ASM1516129v1	Duplodnaviria	Heunggongvirae	Uroviricota	Caudoviricetes	Crassvirales	Suoliviridae	Oafivirinae	Buhlduvirus	NA	Buhlduvirus animalis	uncultured phage cr273_1			CG	dsDNA
GCA_015161355.1_ASM1516135v1	Duplodnaviria	Heunggongvirae	Uroviricota	Caudoviricetes		Salasmaviridae		Huangshavirus	NA	Huangshavirus dlcuna	Bacillus phage Dlc1			CG	dsDNA
GCA_015244885.1_ASM1524488v1	Duplodnaviria	Heunggongvirae	Uroviricota	Caudoviricetes			Arquatrovirinae	Salutenavirus	NA	Salutenavirus salutena	Streptomyces phage Salutena			CG	dsDNA
GCA_015502025.1_ASM1550202v1	Duplodnaviria	Heunggongvirae	Uroviricota	Caudoviricetes		Peduoviridae		Aptresvirus	NA	Aptresvirus mana	Burkholderia phage Mana			CG	dsDNA
GCA_015502035.1_ASM1550203v1	Duplodnaviria	Heunggongvirae	Uroviricota	Caudoviricetes				Micavirus	NA	Micavirus Mica	Burkholderia phage Mica			CG	dsDNA
GCA_015502085.1_ASM1550208v1	Duplodnaviria	Heunggongvirae	Uroviricota	Caudoviricetes			Arquatrovirinae	Sentinelvirus	NA	Sentinelvirus sentinel	Streptomyces phage Sentinel			CG	dsDNA
GCA_015502125.1_ASM1550212v1	Duplodnaviria	Heunggongvirae	Uroviricota	Caudoviricetes			Arquatrovirinae	Sentinelvirus	NA	Sentinelvirus spernnie	Streptomyces phage Spernnie			CG	dsDNA
GCA_015502185.1_ASM1550218v1	Duplodnaviria	Heunggongvirae	Uroviricota	Caudoviricetes		Casjensviridae		Kokobelvirus	NA	Kokobelvirus kokobel1	Providencia phage Kokobel1			CG	dsDNA
GCA_015502255.1_ASM1550225v1	Duplodnaviria	Heunggongvirae	Uroviricota	Caudoviricetes		Demerecviridae		Priunavirus	NA	Priunavirus PSTCR5	Providencia phage PSTCR5			CG	dsDNA
GCA_015620935.1_ASM1562093v1	Duplodnaviria	Heunggongvirae	Uroviricota	Caudoviricetes		Naomviridae		Noahvirus	NA	Noahvirus arc	Bacteriophage DSS3_VP1			CG	dsDNA
GCA_015918135.1_ASM1591813v1	Duplodnaviria	Heunggongvirae	Uroviricota	Caudoviricetes				Jujuvirus	NA	Jujuvirus blino	Gordonia phage Blino			CG	dsDNA
GCA_015918465.1_ASM1591846v1	Duplodnaviria	Heunggongvirae	Uroviricota	Caudoviricetes				Rerduovirus	NA	Rerduovirus phailmary	Rhodococcus phage PhailMary			CG	dsDNA
GCA_015992465.1_ASM1599246v1	Duplodnaviria	Heunggongvirae	Uroviricota	Caudoviricetes				Mycoabscvirus	NA	Mycoabscvirus phiT46-1	Mycobacterium phage phiT46-1			CG	dsDNA
GCA_016103585.1_ASM1610358v1	Duplodnaviria	Heunggongvirae	Uroviricota	Caudoviricetes				Dexdertvirus	NA	Dexdertvirus dexdert	Gordonia phage Dexdert			CG	dsDNA
GCA_016103595.1_ASM1610359v1	Duplodnaviria	Heunggongvirae	Uroviricota	Caudoviricetes				Lilbeanievirus	NA	Lilbeanievirus lilbeanie	Gordonia phage Lilbeanie			CG	dsDNA
GCA_016456145.1_ASM1645614v1	Duplodnaviria	Heunggongvirae	Uroviricota	Caudoviricetes		Casjensviridae		Gediminasvirus	NA	Gediminasvirus AchV4	Achromobacter phage vB_AchrS_AchV4			CG	dsDNA
GCA_016653835.1_ASM1665383v1	Duplodnaviria	Heunggongvirae	Uroviricota	Caudoviricetes			Ruthgordonvirinae	Vendettavirus	NA	Tinalinvirus tinalin	Gordonia phage TinaLin			CG	dsDNA
GCA_016673615.1_ASM1667361v1	Duplodnaviria	Heunggongvirae	Uroviricota	Caudoviricetes		Salasmaviridae		Bundooravirus	NA	Bundooravirus whyphy	Bacillus phage WhyPhy			CG	dsDNA
GCA_016759225.1_ASM1675922v1	Duplodnaviria	Heunggongvirae	Uroviricota	Caudoviricetes				Immutovirus	NA	Immutovirus immuto	Flavobacterium phage vB_FspM_immuto_2-6A			CG	dsDNA
GCA_016865745.1_ASM1686574v1	Duplodnaviria	Heunggongvirae	Uroviricota	Caudoviricetes				Caminolopintovirus	NA	Caminolopintovirus STGO351	Salmonella phage vB_Se_STGO-35-1			CG	dsDNA
GCA_017347815.2_ASM1734781v1	Duplodnaviria	Heunggongvirae	Uroviricota	Caudoviricetes		Schitoviridae		Efbeekayvirus	NA	Efbeekayvirus P184	Klebsiella phage vB_KpnP_P184			CG	dsDNA
GCA_017347905.1_ASM1734790v1	Duplodnaviria	Heunggongvirae	Uroviricota	Caudoviricetes		Schitoviridae		Triduovirus	NA	Triduovirus Tr2	Salmonella phage vB_SalP_TR2			CG	dsDNA
GCA_017654305.1_ASM1765430v1	Duplodnaviria	Heunggongvirae	Uroviricota	Caudoviricetes		Peduoviridae		Tigrvirus	NA	Tigrvirus phiE094	Burkholderia phage phiE094			CG	dsDNA
GCA_017903485.1_ASM1790348v1	Duplodnaviria	Heunggongvirae	Uroviricota	Caudoviricetes		Schitoviridae		Oliverunavirus	NA	Oliverunavirus OLIVR1	Agrobacterium phage OLIVR1			CG	dsDNA
GCA_017903555.1_ASM1790355v1	Duplodnaviria	Heunggongvirae	Uroviricota	Caudoviricetes				Foxunavirus	NA	Foxunavirus fox1	Xanthomonas phage FoX1			CG	dsDNA
GCA_017903585.1_ASM1790358v1	Duplodnaviria	Heunggongvirae	Uroviricota	Caudoviricetes				Foxunavirus	NA	Foxunavirus fox2	Xanthomonas phage FoX2			CG	dsDNA
GCA_017903595.1_ASM1790359v1	Duplodnaviria	Heunggongvirae	Uroviricota	Caudoviricetes				Foxunavirus	NA	Foxunavirus fox3	Xanthomonas phage FoX3			CG	dsDNA
GCA_017903645.1_ASM1790364v1	Duplodnaviria	Heunggongvirae	Uroviricota	Caudoviricetes				Foxquatrovirus	NA	Foxquatrovirus fox4	Xanthomonas phage FoX4			CG	dsDNA
GCA_017903925.1_ASM1790392v1	Duplodnaviria	Heunggongvirae	Uroviricota	Caudoviricetes			Brucestockervirinae	Serpukhovskyvirus	NA	Serpukhovskyvirus ZX4	Klebsiella phage ZX4			CG	dsDNA
GCA_018127655.1_ASM1812765v1	Duplodnaviria	Heunggongvirae	Uroviricota	Caudoviricetes				Swiduovirus	NA	Swiduovirus swi2	Escherichia phage vB_EcoS_swi2			CG	dsDNA
GCA_018642055.1_ASM1864205v1	Duplodnaviria	Heunggongvirae	Uroviricota	Caudoviricetes				Elemovirus	NA	Elemovirus elemoB	Flavobacterium phage vB_FspP_elemoB_14-3B			CG	dsDNA
GCA_018642095.1_ASM1864209v1	Duplodnaviria	Heunggongvirae	Uroviricota	Caudoviricetes				Elemovirus	NA	Elemovirus elemoC	Flavobacterium phage vB_FspP_elemoC_14-1A			CG	dsDNA
GCA_019089635.1_ASM1908963v1	Duplodnaviria	Heunggongvirae	Uroviricota	Caudoviricetes		Pervagoviridae		Callevirus	NA	Callevirus Calle	Cellulophaga phage Calle_1			CG	dsDNA
GCA_019089665.1_ASM1908966v1	Duplodnaviria	Heunggongvirae	Uroviricota	Caudoviricetes		Forsetiviridae		Freyavirus	NA	Freyavirus danklef	Polaribacter phage Danklef_1			CG	dsDNA
GCA_019089715.1_ASM1908971v1	Duplodnaviria	Heunggongvirae	Uroviricota	Caudoviricetes		Forsetiviridae		Freyavirus	NA	Freyavirus freya	Polaribacter phage Freya_1			CG	dsDNA
GCA_019089785.1_ASM1908978v1	Duplodnaviria	Heunggongvirae	Uroviricota	Caudoviricetes		Pachyviridae		Gundelvirus	NA	Gundelvirus Gundel	Tenacibaculum phage Gundel_1			CG	dsDNA
GCA_019089795.1_ASM1908979v1	Duplodnaviria	Heunggongvirae	Uroviricota	Caudoviricetes		Aggregaviridae		Harrekavirus	NA	Harrekavirus harreka	Olleya phage Harreka_1			CG	dsDNA
GCA_019089805.1_ASM1908980v1	Duplodnaviria	Heunggongvirae	Uroviricota	Caudoviricetes		Duneviridae		Ingelinevirus	NA	Ingelinevirus ingeline	Cellulophaga phage Ingeline_1			CG	dsDNA
GCA_019089885.1_ASM1908988v1	Duplodnaviria	Heunggongvirae	Uroviricota	Caudoviricetes		Helgolandviridae		Leefvirus	NA	Leefvirus Leef	Polaribacter phage Leef_1			CG	dsDNA
GCA_019089895.1_ASM1908989v1	Duplodnaviria	Heunggongvirae	Uroviricota	Caudoviricetes		Molycolviridae		Mollyvirus	NA	Mollyvirus molly	Maribacter phage Molly_1			CG	dsDNA
GCA_019089945.1_ASM1908994v1	Duplodnaviria	Heunggongvirae	Uroviricota	Caudoviricetes		Molycolviridae		Mollyvirus	NA	Mollyvirus colly	Maribacter phage Colly_1			CG	dsDNA
GCA_019089955.1_ASM1908995v1	Duplodnaviria	Heunggongvirae	Uroviricota	Caudoviricetes		Assiduviridae		Nekkelsvirus	NA	Nekkelsvirus Nekkels	Cellulophaga phage Nekkels_1			CG	dsDNA
GCA_019090025.1_ASM1909002v1	Duplodnaviria	Heunggongvirae	Uroviricota	Caudoviricetes		Winoviridae		Peternellavirus	NA	Peternellavirus peternella	Winogradskyella phage Peternella_1			CG	dsDNA
GCA_021090175.1_ASM2109017v1	Duplodnaviria	Heunggongvirae	Uroviricota	Caudoviricetes	Crassvirales	Intestiviridae	Crudevirinae	Diorhovirus	NA	Diorhovirus copri	uncultured phage cr49_1			CG	dsDNA
GCA_021090185.1_ASM2109018v1	Duplodnaviria	Heunggongvirae	Uroviricota	Caudoviricetes	Crassvirales	Suoliviridae	Boorivirinae	Cohcovirus	NA	Cohcovirus splanchnicus	uncultured phage cr30_1			CG	dsDNA
GCA_021090195.1_ASM2109019v1	Duplodnaviria	Heunggongvirae	Uroviricota	Caudoviricetes	Crassvirales	Intestiviridae	Crudevirinae	Delmidovirus	NA	Delmidovirus copri	uncultured phage cr123_1			CG	dsDNA
GCA_021090205.1_ASM2109020v1	Duplodnaviria	Heunggongvirae	Uroviricota	Caudoviricetes	Crassvirales	Suoliviridae	Boorivirinae	Culoivirus	NA	Culoivirus faecalis	uncultured phage cr149_1			CG	dsDNA
GCA_021090215.1_ASM2109021v1	Duplodnaviria	Heunggongvirae	Uroviricota	Caudoviricetes	Crassvirales	Steigviridae	Asinivirinae	Kolpuevirus	NA	Kolpuevirus coli	uncultured phage cr151_1			CG	dsDNA
GCA_021090225.1_ASM2109022v1	Duplodnaviria	Heunggongvirae	Uroviricota	Caudoviricetes	Crassvirales	Intestiviridae	Churivirinae	Jahgtovirus	NA	Jahgtovirus gastrointestinalis	uncultured phage cr36_1			CG	dsDNA
GCA_021090235.1_ASM2109023v1	Duplodnaviria	Heunggongvirae	Uroviricota	Caudoviricetes	Crassvirales	Intestiviridae	Crudevirinae	Drivevirus	NA	Drivevirus gastrointestinalis	uncultured phage cr91_1			CG	dsDNA
GCA_021090245.1_ASM2109024v1	Duplodnaviria	Heunggongvirae	Uroviricota	Caudoviricetes	Crassvirales	Intestiviridae	Crudevirinae	Carjivirus	NA	Carjivirus hominis	uncultured phage cr99_1			CG	dsDNA
GCA_021090255.1_ASM2109025v1	Duplodnaviria	Heunggongvirae	Uroviricota	Caudoviricetes	Crassvirales	Suoliviridae	Boorivirinae	Canhaevirus	NA	Canhaevirus faecalis	uncultured phage cr77_1			CG	dsDNA
GCA_021090265.1_ASM2109026v1	Duplodnaviria	Heunggongvirae	Uroviricota	Caudoviricetes	Crassvirales	Steigviridae	Asinivirinae	Kahnovirus	NA	Kahnovirus copri	uncultured phage cr44_1			CG	dsDNA
GCA_021090275.1_ASM2109027v1	Duplodnaviria	Heunggongvirae	Uroviricota	Caudoviricetes	Crassvirales	Intestiviridae	Churivirinae	Jahgtovirus	NA	Jahgtovirus intestinalis	uncultured phage cr54_1			CG	dsDNA
GCA_021090285.1_ASM2109028v1	Duplodnaviria	Heunggongvirae	Uroviricota	Caudoviricetes	Crassvirales	Steigviridae	Asinivirinae	Lebriduvirus	NA	Lebriduvirus gastrointestinalis	uncultured phage cr18_1			CG	dsDNA
GCA_021090295.1_ASM2109029v1	Duplodnaviria	Heunggongvirae	Uroviricota	Caudoviricetes	Crassvirales	Intestiviridae	Crudevirinae	Dabirmavirus	NA	Dabirmavirus hominis	uncultured phage cr9_1			CG	dsDNA
GCA_021090305.1_ASM2109030v1	Duplodnaviria	Heunggongvirae	Uroviricota	Caudoviricetes	Crassvirales	Crevaviridae	Coarsevirinae	Junduvirus	NA	Junduvirus copri	uncultured phage cr25_1			CG	dsDNA
GCA_021090315.1_ASM2109031v1	Duplodnaviria	Heunggongvirae	Uroviricota	Caudoviricetes	Crassvirales	Intestiviridae	Crudevirinae	Endlipuvirus	NA	Endlipuvirus intestinihominis	uncultured phage cr17_1			CG	dsDNA
GCA_021090325.1_ASM2109032v1	Duplodnaviria	Heunggongvirae	Uroviricota	Caudoviricetes	Crassvirales	Crevaviridae	Coarsevirinae	Junduvirus	NA	Junduvirus communis	uncultured phage cr2_1			CG	dsDNA
GCA_021090335.1_ASM2109033v1	Duplodnaviria	Heunggongvirae	Uroviricota	Caudoviricetes	Crassvirales	Crevaviridae	Doltivirinae	Kingevirus	NA	Kingevirus communis	uncultured phage cr13_1			CG	dsDNA
GCA_021090345.1_ASM2109034v1	Duplodnaviria	Heunggongvirae	Uroviricota	Caudoviricetes	Crassvirales	Suoliviridae	Oafivirinae	Bohxovirus	NA	Bohxovirus oralis	uncultured phage cr61_1			CG	dsDNA
GCA_021090355.1_ASM2109035v1	Duplodnaviria	Heunggongvirae	Uroviricota	Caudoviricetes	Crassvirales	Suoliviridae	Bearivirinae	Afonbuvirus	NA	Afonbuvirus intestinihominis	uncultured phage cr12_1			CG	dsDNA
GCA_021090375.1_ASM2109037v1	Duplodnaviria	Heunggongvirae	Uroviricota	Caudoviricetes	Crassvirales	Suoliviridae	Uncouvirinae	Birpovirus	NA	Birpovirus hominis	uncultured phage cr19_1			CG	dsDNA
GCA_021090605.1_ASM2109060v1	Duplodnaviria	Heunggongvirae	Uroviricota	Caudoviricetes	Crassvirales	Suoliviridae	Loutivirinae	Blohavirus	NA	Blohavirus faecalis	uncultured phage cr150_1			CG	dsDNA
GCA_021090625.1_ASM2109062v1	Duplodnaviria	Heunggongvirae	Uroviricota	Caudoviricetes	Crassvirales	Suoliviridae	Oafivirinae	Burzaovirus	NA	Burzaovirus intestinihominis	uncultured phage cr29_1			CG	dsDNA
GCA_021090645.1_ASM2109064v1	Duplodnaviria	Heunggongvirae	Uroviricota	Caudoviricetes	Crassvirales	Suoliviridae	Bearivirinae	Afonbuvirus	NA	Afonbuvirus coli	uncultured phage cr35_1			CG	dsDNA
GCA_021090655.1_ASM2109065v1	Duplodnaviria	Heunggongvirae	Uroviricota	Caudoviricetes	Crassvirales	Suoliviridae	Uncouvirinae	Aurodevirus	NA	Aurodevirus hiberniae	uncultured phage cr23_1			CG	dsDNA
GCA_900010585.1_vB_AbaS_Loki.asm1	Duplodnaviria	Heunggongvirae	Uroviricota	Caudoviricetes				Lokivirus	NA	Acinetobacter virus Loki	Acinetobacter phage Loki			CG	dsDNA
GCA_900096485.1_Pet-CM3-4	Duplodnaviria	Heunggongvirae	Uroviricota	Caudoviricetes		Straboviridae	Tevenvirinae	Karamvirus	NA	Karamvirus petcm34	Cronobacter phage Pet-CM3-4			CG	dsDNA
GCA_900156925.2_BTP1_v2	Duplodnaviria	Heunggongvirae	Uroviricota	Caudoviricetes				Lederbergvirus	NA	Lederbergvirus BTP1	Salmonella phage BTP1			CG	dsDNA
GCA_902994725.1_UFOv-RH-23may17-C8087	Duplodnaviria	Heunggongvirae	Uroviricota	Caudoviricetes		Peduoviridae		Maltschvirus	NA	Maltschvirus maltsch	uncultured Caudovirales phage			CG	dsDNA
