# Supplementary material for: VirClust—A Tool for Hierarchical Clustering, Core Protein Detection and Annotation of (Prokaryotic) Viruses
Source: Viruses. 2023 Apr 19;15(4):1007. doi: 10.3390/v15041007 (PMC10143988; doi:10.3390/v15041007)
Supplement: Supplementary file 1 [file viruses-15-01007-s001.zip › SI_File5_protein_clustering_threholds_annots.xlsx]

## Sheet: P222_vs_P228_PSC_annots
genome_name	gene_ID	gene_start	gene_end	gene_length	strand	frame	protein_name	protein_ID	protein_length	protein_seq	genome_cluster_ID	core_protein	clusterID_prot_name	hhsearch_pVOGs_ID	hhsearch_pVOGs_score	hhsearch_pVOGs_log_eval	pVOGs_host_domain	pVOGs_annots	VOGDB_ID	hhsearch_VOGDB_score	hhsearch_VOGDB_eval	VOGDB_functional_category	VOGDB_annot	PHROGS_ID	hhsearch_PHROGS_score	hhsearch_PHROGS_eval	PHROGS_annot	PHROGS_functional_category	Efam_ID	Efam_eval	Efam_score	Efam_bias	Efam_exp	Efam_annotations	Efam_XC_ID	Efam_XC_eval	Efam_XC_score	Efam_XC_bias	Efam_XC_exp	Efam_XC_annotations	IP_analysis	IP_Accession	IP_Description	IP_start	IP_end	IP_eval	PC_ID_defaul_settings	PSC_ID_default_settings	PC_ID_coverage-70
AF189021.1___Roseophage__SIO1	gene_27	15502	17244	1743	1	0	AF189021.1___Roseophage__SIO1_gene_27	prot_027	581	MEVVFDIETDALDATVIHVLVAKRVGQKGFYVVRDAETFKRLAKQVTLWIGHNVIGFDIPQIKKLWGYGIPLKDVADTLVMSRLLDPTRKGGHSLDALSGNEKIDFHDFSTYTPEMLAYCKQDVAINEKVYLQLKEELSNFGKASIQLEHQMQAIVCEQEKNGFMLDTDIAEEIYTTCLRETNRIEAEIKEFMVPIAVPVKEVIIKRKKDGSIYSNQLLEGCNVQGDYTKIAWEEFNLGSPAQVNKRLDRLGWKPTVKTKSGNSYKICPENLATIPDTAPEAVKGLKAWKVLETRWKLAQEWLQKSQETGRVHGRVILTGAVTHRAAHQGPNMANIPSVPHGKDGILWKMEGMYGAECRQAFKVPEGKLLVGTDAAGIQLRVLAHYMNDPIYTEQVIDG…	1	yes	PSC-1__AF189021.1___Roseophage__SIO1_gene_27	VOG0026	174.4	3.01e-30	Bacteria	DNA polymerase [n=254]; DNA polymerase I [n=240]; putative DNA polymerase [n=99]; No annotation provided [n=38]; hypothetical protein [n=33]; gp45 [n=22]; putative DNA polymerase I [n=21]; DNA polymerase II [n=14]; gp44 [n=13]; gp60 [n=11]; DNA polymerase A [n=10]; gp62 [n=10]; DNA polymerase 1 [n=7]; gp59 [n=7]; gp43 [n=7]; gp5 [n=7]; putative DNA polymerase A [n=6]; PolA [n=6]; putative T7-like…	VOG00029	249.9	1.49e-44	XhXr	sp|P00581|DPOL_BPT7 DNA-directed DNA polymerase	phrog_15971	223.8	2.69e-39	DNA polymerase I	DNA, RNA and nucleotide metabolism	cluster013012	0	1145.6	2.9	1	NA	cluster05983	3.5e-242	806.5	1.8	1.9	NA	PRINTS	PR00868	DNA-polymerase family A (pol I) signature	312	334	8.4E-5	10	1	9
AF189021.1___Roseophage__SIO1	gene_27	15502	17244	1743	1	0	AF189021.1___Roseophage__SIO1_gene_27	prot_027	581	MEVVFDIETDALDATVIHVLVAKRVGQKGFYVVRDAETFKRLAKQVTLWIGHNVIGFDIPQIKKLWGYGIPLKDVADTLVMSRLLDPTRKGGHSLDALSGNEKIDFHDFSTYTPEMLAYCKQDVAINEKVYLQLKEELSNFGKASIQLEHQMQAIVCEQEKNGFMLDTDIAEEIYTTCLRETNRIEAEIKEFMVPIAVPVKEVIIKRKKDGSIYSNQLLEGCNVQGDYTKIAWEEFNLGSPAQVNKRLDRLGWKPTVKTKSGNSYKICPENLATIPDTAPEAVKGLKAWKVLETRWKLAQEWLQKSQETGRVHGRVILTGAVTHRAAHQGPNMANIPSVPHGKDGILWKMEGMYGAECRQAFKVPEGKLLVGTDAAGIQLRVLAHYMNDPIYTEQVIDG…	1	yes	PSC-1__AF189021.1___Roseophage__SIO1_gene_27	VOG0026	174.4	3.01e-30	Bacteria	DNA polymerase [n=254]; DNA polymerase I [n=240]; putative DNA polymerase [n=99]; No annotation provided [n=38]; hypothetical protein [n=33]; gp45 [n=22]; putative DNA polymerase I [n=21]; DNA polymerase II [n=14]; gp44 [n=13]; gp60 [n=11]; DNA polymerase A [n=10]; gp62 [n=10]; DNA polymerase 1 [n=7]; gp59 [n=7]; gp43 [n=7]; gp5 [n=7]; putative DNA polymerase A [n=6]; PolA [n=6]; putative T7-like…	VOG00029	249.9	1.49e-44	XhXr	sp|P00581|DPOL_BPT7 DNA-directed DNA polymerase	phrog_15971	223.8	2.69e-39	DNA polymerase I	DNA, RNA and nucleotide metabolism	cluster013012	0	1145.6	2.9	1	NA	cluster05983	3.5e-242	806.5	1.8	1.9	NA	PRINTS	PR00868	DNA-polymerase family A (pol I) signature	369	392	8.4E-5	10	1	9
AF189021.1___Roseophage__SIO1	gene_27	15502	17244	1743	1	0	AF189021.1___Roseophage__SIO1_gene_27	prot_027	581	MEVVFDIETDALDATVIHVLVAKRVGQKGFYVVRDAETFKRLAKQVTLWIGHNVIGFDIPQIKKLWGYGIPLKDVADTLVMSRLLDPTRKGGHSLDALSGNEKIDFHDFSTYTPEMLAYCKQDVAINEKVYLQLKEELSNFGKASIQLEHQMQAIVCEQEKNGFMLDTDIAEEIYTTCLRETNRIEAEIKEFMVPIAVPVKEVIIKRKKDGSIYSNQLLEGCNVQGDYTKIAWEEFNLGSPAQVNKRLDRLGWKPTVKTKSGNSYKICPENLATIPDTAPEAVKGLKAWKVLETRWKLAQEWLQKSQETGRVHGRVILTGAVTHRAAHQGPNMANIPSVPHGKDGILWKMEGMYGAECRQAFKVPEGKLLVGTDAAGIQLRVLAHYMNDPIYTEQVIDG…	1	yes	PSC-1__AF189021.1___Roseophage__SIO1_gene_27	VOG0026	174.4	3.01e-30	Bacteria	DNA polymerase [n=254]; DNA polymerase I [n=240]; putative DNA polymerase [n=99]; No annotation provided [n=38]; hypothetical protein [n=33]; gp45 [n=22]; putative DNA polymerase I [n=21]; DNA polymerase II [n=14]; gp44 [n=13]; gp60 [n=11]; DNA polymerase A [n=10]; gp62 [n=10]; DNA polymerase 1 [n=7]; gp59 [n=7]; gp43 [n=7]; gp5 [n=7]; putative DNA polymerase A [n=6]; PolA [n=6]; putative T7-like…	VOG00029	249.9	1.49e-44	XhXr	sp|P00581|DPOL_BPT7 DNA-directed DNA polymerase	phrog_15971	223.8	2.69e-39	DNA polymerase I	DNA, RNA and nucleotide metabolism	cluster013012	0	1145.6	2.9	1	NA	cluster05983	3.5e-242	806.5	1.8	1.9	NA	PRINTS	PR00868	DNA-polymerase family A (pol I) signature	524	537	8.4E-5	10	1	9
AF189021.1___Roseophage__SIO1	gene_27	15502	17244	1743	1	0	AF189021.1___Roseophage__SIO1_gene_27	prot_027	581	MEVVFDIETDALDATVIHVLVAKRVGQKGFYVVRDAETFKRLAKQVTLWIGHNVIGFDIPQIKKLWGYGIPLKDVADTLVMSRLLDPTRKGGHSLDALSGNEKIDFHDFSTYTPEMLAYCKQDVAINEKVYLQLKEELSNFGKASIQLEHQMQAIVCEQEKNGFMLDTDIAEEIYTTCLRETNRIEAEIKEFMVPIAVPVKEVIIKRKKDGSIYSNQLLEGCNVQGDYTKIAWEEFNLGSPAQVNKRLDRLGWKPTVKTKSGNSYKICPENLATIPDTAPEAVKGLKAWKVLETRWKLAQEWLQKSQETGRVHGRVILTGAVTHRAAHQGPNMANIPSVPHGKDGILWKMEGMYGAECRQAFKVPEGKLLVGTDAAGIQLRVLAHYMNDPIYTEQVIDG…	1	yes	PSC-1__AF189021.1___Roseophage__SIO1_gene_27	VOG0026	174.4	3.01e-30	Bacteria	DNA polymerase [n=254]; DNA polymerase I [n=240]; putative DNA polymerase [n=99]; No annotation provided [n=38]; hypothetical protein [n=33]; gp45 [n=22]; putative DNA polymerase I [n=21]; DNA polymerase II [n=14]; gp44 [n=13]; gp60 [n=11]; DNA polymerase A [n=10]; gp62 [n=10]; DNA polymerase 1 [n=7]; gp59 [n=7]; gp43 [n=7]; gp5 [n=7]; putative DNA polymerase A [n=6]; PolA [n=6]; putative T7-like…	VOG00029	249.9	1.49e-44	XhXr	sp|P00581|DPOL_BPT7 DNA-directed DNA polymerase	phrog_15971	223.8	2.69e-39	DNA polymerase I	DNA, RNA and nucleotide metabolism	cluster013012	0	1145.6	2.9	1	NA	cluster05983	3.5e-242	806.5	1.8	1.9	NA	Pfam	PF00476	DNA polymerase family A	226	577	2.1E-40	10	1	9
JQ809650.1___Celeribacter__phage__P12053L	gene_23	8472	10214	1743	1	0	JQ809650.1___Celeribacter__phage__P12053L_gene_23	prot_431	581	MEVVFDIETDSLDATVIHVLVAKRVGQKGFYVIRDAETFKRLAKQVTLWIGHNVIGFDIPQIKKLWGYEIPLKDVADTLVMSRLADPTRKGGHSLDTLSGNEKIDFHDFSTYTPEMLAYCKQDVAINEKVYLQLKDELSNFGKASIQLEHQMQAIVCEQEKNGFMLDTDIAEEIYTTCLRETNRIEAEIKEFMVPIAVPDKEVIIKRKKDGSIYANQLLEGCNVQGDYTKIDWEEFNLGSPAQVNKRLDRLGWKPYIKTKSGNSYKICPENLATISDTAPEAVKGLKAWKVLETRWKLAQEWLQKSQATGRVHGRVILTGAVTHRAAHQGPNMANIPSVPHGKDGILWKMEGMYGAECRQAFKVPEGKLLVGTDAAGIQLRVLAHYMNDPIYTEQVIDG…	1	yes	PSC-1__JQ809650.1___Celeribacter__phage__P12053L_gene_23	VOG0026	169.8	2.41e-29	Bacteria	DNA polymerase [n=254]; DNA polymerase I [n=240]; putative DNA polymerase [n=99]; No annotation provided [n=38]; hypothetical protein [n=33]; gp45 [n=22]; putative DNA polymerase I [n=21]; DNA polymerase II [n=14]; gp44 [n=13]; gp60 [n=11]; DNA polymerase A [n=10]; gp62 [n=10]; DNA polymerase 1 [n=7]; gp59 [n=7]; gp43 [n=7]; gp5 [n=7]; putative DNA polymerase A [n=6]; PolA [n=6]; putative T7-like…	VOG00029	250	1.4e-44	XhXr	sp|P00581|DPOL_BPT7 DNA-directed DNA polymerase	phrog_15971	221.6	7.26e-39	DNA polymerase I	DNA, RNA and nucleotide metabolism	cluster013012	0	1126.8	3.6	1	NA	cluster05983	2.9e-240	800.2	3.4	1.9	NA	PRINTS	PR00868	DNA-polymerase family A (pol I) signature	312	334	8.4E-5	10	1	9
JQ809650.1___Celeribacter__phage__P12053L	gene_23	8472	10214	1743	1	0	JQ809650.1___Celeribacter__phage__P12053L_gene_23	prot_431	581	MEVVFDIETDSLDATVIHVLVAKRVGQKGFYVIRDAETFKRLAKQVTLWIGHNVIGFDIPQIKKLWGYEIPLKDVADTLVMSRLADPTRKGGHSLDTLSGNEKIDFHDFSTYTPEMLAYCKQDVAINEKVYLQLKDELSNFGKASIQLEHQMQAIVCEQEKNGFMLDTDIAEEIYTTCLRETNRIEAEIKEFMVPIAVPDKEVIIKRKKDGSIYANQLLEGCNVQGDYTKIDWEEFNLGSPAQVNKRLDRLGWKPYIKTKSGNSYKICPENLATISDTAPEAVKGLKAWKVLETRWKLAQEWLQKSQATGRVHGRVILTGAVTHRAAHQGPNMANIPSVPHGKDGILWKMEGMYGAECRQAFKVPEGKLLVGTDAAGIQLRVLAHYMNDPIYTEQVIDG…	1	yes	PSC-1__JQ809650.1___Celeribacter__phage__P12053L_gene_23	VOG0026	169.8	2.41e-29	Bacteria	DNA polymerase [n=254]; DNA polymerase I [n=240]; putative DNA polymerase [n=99]; No annotation provided [n=38]; hypothetical protein [n=33]; gp45 [n=22]; putative DNA polymerase I [n=21]; DNA polymerase II [n=14]; gp44 [n=13]; gp60 [n=11]; DNA polymerase A [n=10]; gp62 [n=10]; DNA polymerase 1 [n=7]; gp59 [n=7]; gp43 [n=7]; gp5 [n=7]; putative DNA polymerase A [n=6]; PolA [n=6]; putative T7-like…	VOG00029	250	1.4e-44	XhXr	sp|P00581|DPOL_BPT7 DNA-directed DNA polymerase	phrog_15971	221.6	7.26e-39	DNA polymerase I	DNA, RNA and nucleotide metabolism	cluster013012	0	1126.8	3.6	1	NA	cluster05983	2.9e-240	800.2	3.4	1.9	NA	PRINTS	PR00868	DNA-polymerase family A (pol I) signature	369	392	8.4E-5	10	1	9
JQ809650.1___Celeribacter__phage__P12053L	gene_23	8472	10214	1743	1	0	JQ809650.1___Celeribacter__phage__P12053L_gene_23	prot_431	581	MEVVFDIETDSLDATVIHVLVAKRVGQKGFYVIRDAETFKRLAKQVTLWIGHNVIGFDIPQIKKLWGYEIPLKDVADTLVMSRLADPTRKGGHSLDTLSGNEKIDFHDFSTYTPEMLAYCKQDVAINEKVYLQLKDELSNFGKASIQLEHQMQAIVCEQEKNGFMLDTDIAEEIYTTCLRETNRIEAEIKEFMVPIAVPDKEVIIKRKKDGSIYANQLLEGCNVQGDYTKIDWEEFNLGSPAQVNKRLDRLGWKPYIKTKSGNSYKICPENLATISDTAPEAVKGLKAWKVLETRWKLAQEWLQKSQATGRVHGRVILTGAVTHRAAHQGPNMANIPSVPHGKDGILWKMEGMYGAECRQAFKVPEGKLLVGTDAAGIQLRVLAHYMNDPIYTEQVIDG…	1	yes	PSC-1__JQ809650.1___Celeribacter__phage__P12053L_gene_23	VOG0026	169.8	2.41e-29	Bacteria	DNA polymerase [n=254]; DNA polymerase I [n=240]; putative DNA polymerase [n=99]; No annotation provided [n=38]; hypothetical protein [n=33]; gp45 [n=22]; putative DNA polymerase I [n=21]; DNA polymerase II [n=14]; gp44 [n=13]; gp60 [n=11]; DNA polymerase A [n=10]; gp62 [n=10]; DNA polymerase 1 [n=7]; gp59 [n=7]; gp43 [n=7]; gp5 [n=7]; putative DNA polymerase A [n=6]; PolA [n=6]; putative T7-like…	VOG00029	250	1.4e-44	XhXr	sp|P00581|DPOL_BPT7 DNA-directed DNA polymerase	phrog_15971	221.6	7.26e-39	DNA polymerase I	DNA, RNA and nucleotide metabolism	cluster013012	0	1126.8	3.6	1	NA	cluster05983	2.9e-240	800.2	3.4	1.9	NA	PRINTS	PR00868	DNA-polymerase family A (pol I) signature	524	537	8.4E-5	10	1	9
JQ809650.1___Celeribacter__phage__P12053L	gene_23	8472	10214	1743	1	0	JQ809650.1___Celeribacter__phage__P12053L_gene_23	prot_431	581	MEVVFDIETDSLDATVIHVLVAKRVGQKGFYVIRDAETFKRLAKQVTLWIGHNVIGFDIPQIKKLWGYEIPLKDVADTLVMSRLADPTRKGGHSLDTLSGNEKIDFHDFSTYTPEMLAYCKQDVAINEKVYLQLKDELSNFGKASIQLEHQMQAIVCEQEKNGFMLDTDIAEEIYTTCLRETNRIEAEIKEFMVPIAVPDKEVIIKRKKDGSIYANQLLEGCNVQGDYTKIDWEEFNLGSPAQVNKRLDRLGWKPYIKTKSGNSYKICPENLATISDTAPEAVKGLKAWKVLETRWKLAQEWLQKSQATGRVHGRVILTGAVTHRAAHQGPNMANIPSVPHGKDGILWKMEGMYGAECRQAFKVPEGKLLVGTDAAGIQLRVLAHYMNDPIYTEQVIDG…	1	yes	PSC-1__JQ809650.1___Celeribacter__phage__P12053L_gene_23	VOG0026	169.8	2.41e-29	Bacteria	DNA polymerase [n=254]; DNA polymerase I [n=240]; putative DNA polymerase [n=99]; No annotation provided [n=38]; hypothetical protein [n=33]; gp45 [n=22]; putative DNA polymerase I [n=21]; DNA polymerase II [n=14]; gp44 [n=13]; gp60 [n=11]; DNA polymerase A [n=10]; gp62 [n=10]; DNA polymerase 1 [n=7]; gp59 [n=7]; gp43 [n=7]; gp5 [n=7]; putative DNA polymerase A [n=6]; PolA [n=6]; putative T7-like…	VOG00029	250	1.4e-44	XhXr	sp|P00581|DPOL_BPT7 DNA-directed DNA polymerase	phrog_15971	221.6	7.26e-39	DNA polymerase I	DNA, RNA and nucleotide metabolism	cluster013012	0	1126.8	3.6	1	NA	cluster05983	2.9e-240	800.2	3.4	1.9	NA	Pfam	PF00476	DNA polymerase family A	234	577	1.8E-39	10	1	9
MF431615.1___Lentibacter__virus__vB_LenP_ICBM3	gene_40	31162	32904	1743	-1	0	MF431615.1___Lentibacter__virus__vB_LenP_ICBM3_gene_40	prot_702	581	MEVVFDIETDALDATVIHVLVAKRVGQKGFYVIRDAETFKRLAKQVTLWIGHNVIGFDIPQIKKLWGYEIPLKDVADTLVMSRLADPTRKGGHSLDALSGNEKIDFHDFSTYTPEMLAYCKQDVAINEKVYLQLKDELSNFGKASIQLEHQMQAIVCEQEKNGFMLDTDIAEEIYTTCLRETNRIEAEIKEFMVPIAVPVKEVIIKRKKDGSIYANQLLDGCNVQGDYTKIEWEEFNLGSPVQVNKRLDRLGWKPYIKTKSGNSYKICPENLATIPDTAPEAVKGLKAWKVLETRWKLAQEWLQKSQATGRVHGRVILTGAVTHRAAHQGPNMANIPSVPHGKDGILWKMEGMYGAECRQAFKVPEGKLLVGTDAAGIQLRVLAHYMNDPIYTEQVIDG…	1	yes	PSC-1__MF431615.1___Lentibacter__virus__vB_LenP_ICBM3_gene_40	VOG0026	168.7	3.91e-29	Bacteria	DNA polymerase [n=254]; DNA polymerase I [n=240]; putative DNA polymerase [n=99]; No annotation provided [n=38]; hypothetical protein [n=33]; gp45 [n=22]; putative DNA polymerase I [n=21]; DNA polymerase II [n=14]; gp44 [n=13]; gp60 [n=11]; DNA polymerase A [n=10]; gp62 [n=10]; DNA polymerase 1 [n=7]; gp59 [n=7]; gp43 [n=7]; gp5 [n=7]; putative DNA polymerase A [n=6]; PolA [n=6]; putative T7-like…	VOG00029	248.3	3.01e-44	XhXr	sp|P00581|DPOL_BPT7 DNA-directed DNA polymerase	phrog_15971	222.7	4.49e-39	DNA polymerase I	DNA, RNA and nucleotide metabolism	cluster013012	0	1135	3.5	1	NA	cluster05983	3.3e-241	803.3	2.7	1.9	NA	PRINTS	PR00868	DNA-polymerase family A (pol I) signature	312	334	8.4E-5	10	1	9
MF431615.1___Lentibacter__virus__vB_LenP_ICBM3	gene_40	31162	32904	1743	-1	0	MF431615.1___Lentibacter__virus__vB_LenP_ICBM3_gene_40	prot_702	581	MEVVFDIETDALDATVIHVLVAKRVGQKGFYVIRDAETFKRLAKQVTLWIGHNVIGFDIPQIKKLWGYEIPLKDVADTLVMSRLADPTRKGGHSLDALSGNEKIDFHDFSTYTPEMLAYCKQDVAINEKVYLQLKDELSNFGKASIQLEHQMQAIVCEQEKNGFMLDTDIAEEIYTTCLRETNRIEAEIKEFMVPIAVPVKEVIIKRKKDGSIYANQLLDGCNVQGDYTKIEWEEFNLGSPVQVNKRLDRLGWKPYIKTKSGNSYKICPENLATIPDTAPEAVKGLKAWKVLETRWKLAQEWLQKSQATGRVHGRVILTGAVTHRAAHQGPNMANIPSVPHGKDGILWKMEGMYGAECRQAFKVPEGKLLVGTDAAGIQLRVLAHYMNDPIYTEQVIDG…	1	yes	PSC-1__MF431615.1___Lentibacter__virus__vB_LenP_ICBM3_gene_40	VOG0026	168.7	3.91e-29	Bacteria	DNA polymerase [n=254]; DNA polymerase I [n=240]; putative DNA polymerase [n=99]; No annotation provided [n=38]; hypothetical protein [n=33]; gp45 [n=22]; putative DNA polymerase I [n=21]; DNA polymerase II [n=14]; gp44 [n=13]; gp60 [n=11]; DNA polymerase A [n=10]; gp62 [n=10]; DNA polymerase 1 [n=7]; gp59 [n=7]; gp43 [n=7]; gp5 [n=7]; putative DNA polymerase A [n=6]; PolA [n=6]; putative T7-like…	VOG00029	248.3	3.01e-44	XhXr	sp|P00581|DPOL_BPT7 DNA-directed DNA polymerase	phrog_15971	222.7	4.49e-39	DNA polymerase I	DNA, RNA and nucleotide metabolism	cluster013012	0	1135	3.5	1	NA	cluster05983	3.3e-241	803.3	2.7	1.9	NA	PRINTS	PR00868	DNA-polymerase family A (pol I) signature	369	392	8.4E-5	10	1	9
MF431615.1___Lentibacter__virus__vB_LenP_ICBM3	gene_40	31162	32904	1743	-1	0	MF431615.1___Lentibacter__virus__vB_LenP_ICBM3_gene_40	prot_702	581	MEVVFDIETDALDATVIHVLVAKRVGQKGFYVIRDAETFKRLAKQVTLWIGHNVIGFDIPQIKKLWGYEIPLKDVADTLVMSRLADPTRKGGHSLDALSGNEKIDFHDFSTYTPEMLAYCKQDVAINEKVYLQLKDELSNFGKASIQLEHQMQAIVCEQEKNGFMLDTDIAEEIYTTCLRETNRIEAEIKEFMVPIAVPVKEVIIKRKKDGSIYANQLLDGCNVQGDYTKIEWEEFNLGSPVQVNKRLDRLGWKPYIKTKSGNSYKICPENLATIPDTAPEAVKGLKAWKVLETRWKLAQEWLQKSQATGRVHGRVILTGAVTHRAAHQGPNMANIPSVPHGKDGILWKMEGMYGAECRQAFKVPEGKLLVGTDAAGIQLRVLAHYMNDPIYTEQVIDG…	1	yes	PSC-1__MF431615.1___Lentibacter__virus__vB_LenP_ICBM3_gene_40	VOG0026	168.7	3.91e-29	Bacteria	DNA polymerase [n=254]; DNA polymerase I [n=240]; putative DNA polymerase [n=99]; No annotation provided [n=38]; hypothetical protein [n=33]; gp45 [n=22]; putative DNA polymerase I [n=21]; DNA polymerase II [n=14]; gp44 [n=13]; gp60 [n=11]; DNA polymerase A [n=10]; gp62 [n=10]; DNA polymerase 1 [n=7]; gp59 [n=7]; gp43 [n=7]; gp5 [n=7]; putative DNA polymerase A [n=6]; PolA [n=6]; putative T7-like…	VOG00029	248.3	3.01e-44	XhXr	sp|P00581|DPOL_BPT7 DNA-directed DNA polymerase	phrog_15971	222.7	4.49e-39	DNA polymerase I	DNA, RNA and nucleotide metabolism	cluster013012	0	1135	3.5	1	NA	cluster05983	3.3e-241	803.3	2.7	1.9	NA	PRINTS	PR00868	DNA-polymerase family A (pol I) signature	524	537	8.4E-5	10	1	9
MF431615.1___Lentibacter__virus__vB_LenP_ICBM3	gene_40	31162	32904	1743	-1	0	MF431615.1___Lentibacter__virus__vB_LenP_ICBM3_gene_40	prot_702	581	MEVVFDIETDALDATVIHVLVAKRVGQKGFYVIRDAETFKRLAKQVTLWIGHNVIGFDIPQIKKLWGYEIPLKDVADTLVMSRLADPTRKGGHSLDALSGNEKIDFHDFSTYTPEMLAYCKQDVAINEKVYLQLKDELSNFGKASIQLEHQMQAIVCEQEKNGFMLDTDIAEEIYTTCLRETNRIEAEIKEFMVPIAVPVKEVIIKRKKDGSIYANQLLDGCNVQGDYTKIEWEEFNLGSPVQVNKRLDRLGWKPYIKTKSGNSYKICPENLATIPDTAPEAVKGLKAWKVLETRWKLAQEWLQKSQATGRVHGRVILTGAVTHRAAHQGPNMANIPSVPHGKDGILWKMEGMYGAECRQAFKVPEGKLLVGTDAAGIQLRVLAHYMNDPIYTEQVIDG…	1	yes	PSC-1__MF431615.1___Lentibacter__virus__vB_LenP_ICBM3_gene_40	VOG0026	168.7	3.91e-29	Bacteria	DNA polymerase [n=254]; DNA polymerase I [n=240]; putative DNA polymerase [n=99]; No annotation provided [n=38]; hypothetical protein [n=33]; gp45 [n=22]; putative DNA polymerase I [n=21]; DNA polymerase II [n=14]; gp44 [n=13]; gp60 [n=11]; DNA polymerase A [n=10]; gp62 [n=10]; DNA polymerase 1 [n=7]; gp59 [n=7]; gp43 [n=7]; gp5 [n=7]; putative DNA polymerase A [n=6]; PolA [n=6]; putative T7-like…	VOG00029	248.3	3.01e-44	XhXr	sp|P00581|DPOL_BPT7 DNA-directed DNA polymerase	phrog_15971	222.7	4.49e-39	DNA polymerase I	DNA, RNA and nucleotide metabolism	cluster013012	0	1135	3.5	1	NA	cluster05983	3.3e-241	803.3	2.7	1.9	NA	Pfam	PF00476	DNA polymerase family A	234	577	8.6E-39	10	1	9
MF431617.1___Lentibacter__virus__vB_LenP_ICBM1	gene_20	7597	9339	1743	1	0	MF431617.1___Lentibacter__virus__vB_LenP_ICBM1_gene_20	prot_796	581	MEVVFDIETDALDATVIHVLVAKRVGQEGFYVIRDAETFKRLAKQVTLWIGHNVIGFDIPQIKKLWGYEIPLKDVADTLVMSRLADPTRKGGHSLDALSGNEKIDFHDFSTYTPEMLAYCKQDVAINEKVYLQLKDELSNFGKASIQLEHQMQAIVCEQEKNGFMLDTDIAEEIYTTCLRETNRIEAEIKEFMVPIAVPVKEVIIKHKKDGSIYANQLLEGCNVQGDYTKIEWEEFNLGSPVQVNKRLDRLGWKPTVKTKSGNSYKICPENLATIPDTAPEAVKGLKAWKVLETRWKLAQEWLQKSQATGRVHGRVILTGAVTHRAAHQGPNMANIPSVPHGKDGILWKMEGMYGAECRQAFKVPEGKLLVGTDAAGIQLRVLAHYMNDPIYTEQVIDG…	1	yes	PSC-1__MF431617.1___Lentibacter__virus__vB_LenP_ICBM1_gene_20	VOG0026	171.2	1.3e-29	Bacteria	DNA polymerase [n=254]; DNA polymerase I [n=240]; putative DNA polymerase [n=99]; No annotation provided [n=38]; hypothetical protein [n=33]; gp45 [n=22]; putative DNA polymerase I [n=21]; DNA polymerase II [n=14]; gp44 [n=13]; gp60 [n=11]; DNA polymerase A [n=10]; gp62 [n=10]; DNA polymerase 1 [n=7]; gp59 [n=7]; gp43 [n=7]; gp5 [n=7]; putative DNA polymerase A [n=6]; PolA [n=6]; putative T7-like…	VOG00029	248.8	2.37e-44	XhXr	sp|P00581|DPOL_BPT7 DNA-directed DNA polymerase	phrog_15971	226.7	7.27e-40	DNA polymerase I	DNA, RNA and nucleotide metabolism	cluster013012	0	1142.8	3.8	1	NA	cluster05983	1.6e-242	807.6	2.9	1.9	NA	Pfam	PF00476	DNA polymerase family A	234	577	1.1E-39	10	1	9
MF431617.1___Lentibacter__virus__vB_LenP_ICBM1	gene_20	7597	9339	1743	1	0	MF431617.1___Lentibacter__virus__vB_LenP_ICBM1_gene_20	prot_796	581	MEVVFDIETDALDATVIHVLVAKRVGQEGFYVIRDAETFKRLAKQVTLWIGHNVIGFDIPQIKKLWGYEIPLKDVADTLVMSRLADPTRKGGHSLDALSGNEKIDFHDFSTYTPEMLAYCKQDVAINEKVYLQLKDELSNFGKASIQLEHQMQAIVCEQEKNGFMLDTDIAEEIYTTCLRETNRIEAEIKEFMVPIAVPVKEVIIKHKKDGSIYANQLLEGCNVQGDYTKIEWEEFNLGSPVQVNKRLDRLGWKPTVKTKSGNSYKICPENLATIPDTAPEAVKGLKAWKVLETRWKLAQEWLQKSQATGRVHGRVILTGAVTHRAAHQGPNMANIPSVPHGKDGILWKMEGMYGAECRQAFKVPEGKLLVGTDAAGIQLRVLAHYMNDPIYTEQVIDG…	1	yes	PSC-1__MF431617.1___Lentibacter__virus__vB_LenP_ICBM1_gene_20	VOG0026	171.2	1.3e-29	Bacteria	DNA polymerase [n=254]; DNA polymerase I [n=240]; putative DNA polymerase [n=99]; No annotation provided [n=38]; hypothetical protein [n=33]; gp45 [n=22]; putative DNA polymerase I [n=21]; DNA polymerase II [n=14]; gp44 [n=13]; gp60 [n=11]; DNA polymerase A [n=10]; gp62 [n=10]; DNA polymerase 1 [n=7]; gp59 [n=7]; gp43 [n=7]; gp5 [n=7]; putative DNA polymerase A [n=6]; PolA [n=6]; putative T7-like…	VOG00029	248.8	2.37e-44	XhXr	sp|P00581|DPOL_BPT7 DNA-directed DNA polymerase	phrog_15971	226.7	7.27e-40	DNA polymerase I	DNA, RNA and nucleotide metabolism	cluster013012	0	1142.8	3.8	1	NA	cluster05983	1.6e-242	807.6	2.9	1.9	NA	PRINTS	PR00868	DNA-polymerase family A (pol I) signature	312	334	8.4E-5	10	1	9
MF431617.1___Lentibacter__virus__vB_LenP_ICBM1	gene_20	7597	9339	1743	1	0	MF431617.1___Lentibacter__virus__vB_LenP_ICBM1_gene_20	prot_796	581	MEVVFDIETDALDATVIHVLVAKRVGQEGFYVIRDAETFKRLAKQVTLWIGHNVIGFDIPQIKKLWGYEIPLKDVADTLVMSRLADPTRKGGHSLDALSGNEKIDFHDFSTYTPEMLAYCKQDVAINEKVYLQLKDELSNFGKASIQLEHQMQAIVCEQEKNGFMLDTDIAEEIYTTCLRETNRIEAEIKEFMVPIAVPVKEVIIKHKKDGSIYANQLLEGCNVQGDYTKIEWEEFNLGSPVQVNKRLDRLGWKPTVKTKSGNSYKICPENLATIPDTAPEAVKGLKAWKVLETRWKLAQEWLQKSQATGRVHGRVILTGAVTHRAAHQGPNMANIPSVPHGKDGILWKMEGMYGAECRQAFKVPEGKLLVGTDAAGIQLRVLAHYMNDPIYTEQVIDG…	1	yes	PSC-1__MF431617.1___Lentibacter__virus__vB_LenP_ICBM1_gene_20	VOG0026	171.2	1.3e-29	Bacteria	DNA polymerase [n=254]; DNA polymerase I [n=240]; putative DNA polymerase [n=99]; No annotation provided [n=38]; hypothetical protein [n=33]; gp45 [n=22]; putative DNA polymerase I [n=21]; DNA polymerase II [n=14]; gp44 [n=13]; gp60 [n=11]; DNA polymerase A [n=10]; gp62 [n=10]; DNA polymerase 1 [n=7]; gp59 [n=7]; gp43 [n=7]; gp5 [n=7]; putative DNA polymerase A [n=6]; PolA [n=6]; putative T7-like…	VOG00029	248.8	2.37e-44	XhXr	sp|P00581|DPOL_BPT7 DNA-directed DNA polymerase	phrog_15971	226.7	7.27e-40	DNA polymerase I	DNA, RNA and nucleotide metabolism	cluster013012	0	1142.8	3.8	1	NA	cluster05983	1.6e-242	807.6	2.9	1.9	NA	PRINTS	PR00868	DNA-polymerase family A (pol I) signature	369	392	8.4E-5	10	1	9
MF431617.1___Lentibacter__virus__vB_LenP_ICBM1	gene_20	7597	9339	1743	1	0	MF431617.1___Lentibacter__virus__vB_LenP_ICBM1_gene_20	prot_796	581	MEVVFDIETDALDATVIHVLVAKRVGQEGFYVIRDAETFKRLAKQVTLWIGHNVIGFDIPQIKKLWGYEIPLKDVADTLVMSRLADPTRKGGHSLDALSGNEKIDFHDFSTYTPEMLAYCKQDVAINEKVYLQLKDELSNFGKASIQLEHQMQAIVCEQEKNGFMLDTDIAEEIYTTCLRETNRIEAEIKEFMVPIAVPVKEVIIKHKKDGSIYANQLLEGCNVQGDYTKIEWEEFNLGSPVQVNKRLDRLGWKPTVKTKSGNSYKICPENLATIPDTAPEAVKGLKAWKVLETRWKLAQEWLQKSQATGRVHGRVILTGAVTHRAAHQGPNMANIPSVPHGKDGILWKMEGMYGAECRQAFKVPEGKLLVGTDAAGIQLRVLAHYMNDPIYTEQVIDG…	1	yes	PSC-1__MF431617.1___Lentibacter__virus__vB_LenP_ICBM1_gene_20	VOG0026	171.2	1.3e-29	Bacteria	DNA polymerase [n=254]; DNA polymerase I [n=240]; putative DNA polymerase [n=99]; No annotation provided [n=38]; hypothetical protein [n=33]; gp45 [n=22]; putative DNA polymerase I [n=21]; DNA polymerase II [n=14]; gp44 [n=13]; gp60 [n=11]; DNA polymerase A [n=10]; gp62 [n=10]; DNA polymerase 1 [n=7]; gp59 [n=7]; gp43 [n=7]; gp5 [n=7]; putative DNA polymerase A [n=6]; PolA [n=6]; putative T7-like…	VOG00029	248.8	2.37e-44	XhXr	sp|P00581|DPOL_BPT7 DNA-directed DNA polymerase	phrog_15971	226.7	7.27e-40	DNA polymerase I	DNA, RNA and nucleotide metabolism	cluster013012	0	1142.8	3.8	1	NA	cluster05983	1.6e-242	807.6	2.9	1.9	NA	PRINTS	PR00868	DNA-polymerase family A (pol I) signature	524	537	8.4E-5	10	1	9
KC751414.1___Pseudoalteromonas__phage__RIO_1	gene_22	13459	15498	2040	1	0	KC751414.1___Pseudoalteromonas__phage__RIO_1_gene_22	prot_486	680	MHVYVFDLEANGLLDVATVVHCGSFKNTQTGEITSFRPDEIQSMLAFMQKADVLIGHNCIHYDFPLLKKLYDFEYEGQVVDTVWMSRMLYPDIQRPKQMVIDHSVKRTEVAYMVKEGLLPEGFRAHLSGPHSIEAWGYRLGHGKLEYNDWETFDEGMLDRCEGDVLIQELLFKTLKSEGEKRGFPKESFNVTFELMQILADSEQRGWPVDVPLAQKYEAQLQRWMRMIQDVTYPHLPMVLEVLEGKKDGEVNWVRKPFLTSGKYSAIVARHDPHLENKTAKEGYVAGPFTRVQFRRMNLGSDDEVKKYLLDAGWIPEEWNYKKDPKTKRNLKDNNGKLIPTSPKLSQSDPFIGVDGKVGRLLAKFIQVRHRLSLIQGILKRVRPDGTVGQVITGIAATG…	1	yes	PSC-1__KC751414.1___Pseudoalteromonas__phage__RIO_1_gene_22	VOG0026	154.9	1.99e-26	Bacteria	DNA polymerase [n=254]; DNA polymerase I [n=240]; putative DNA polymerase [n=99]; No annotation provided [n=38]; hypothetical protein [n=33]; gp45 [n=22]; putative DNA polymerase I [n=21]; DNA polymerase II [n=14]; gp44 [n=13]; gp60 [n=11]; DNA polymerase A [n=10]; gp62 [n=10]; DNA polymerase 1 [n=7]; gp59 [n=7]; gp43 [n=7]; gp5 [n=7]; putative DNA polymerase A [n=6]; PolA [n=6]; putative T7-like…	VOG00029	218.3	2.21e-38	XhXr	sp|P00581|DPOL_BPT7 DNA-directed DNA polymerase	phrog_17	135.3	5.54e-22	DNA polymerase	DNA, RNA and nucleotide metabolism	cluster023631	3.9e-289	964.2	0	1	NA	cluster11830	5.6e-302	1004	0	1	' DNA polymerase'=5; 'POLAc domain-containing protein '=1; 'DNA polymerase'=6; 'DNA polymerase family A '=5; 'Putative DNA polymerase '=2; 'T7-like DNA polymerase '=1; 'DNA-directed DNA polymerase; family A; palm domain '=1; 'No Annotation Found'=1; ' DNA-directed DNA polymerase'=1; 'Ribonuclease H-like domain protein '=1;	Pfam	PF00476	DNA polymerase family A	296	676	2.3E-22	44	1	9
KF302037.1___Pseudoalteromonas__phage__HP1	gene_1	1	1917	1917	1	0	KF302037.1___Pseudoalteromonas__phage__HP1_gene_1	prot_522	639	QSMLAFMEKADVLIGHNCIHYDFPLLKKLHDFEYNGQVVDTVWMSRMLYPDIQRPKQMVIDHSVKRTEVAYMVKEGLLPEGFRAHLSGPHSIEAWGYRLGHGKLEYNDWETFDEGMLDRCEGDVLIQEMLFKTLKAEGEKRGFPKESFNVTFELMQILADSEQRGWPVDVPLAQKYELQLQRWMRMIQDVTYPYLPMVLEVLEGKKDGEVNWVRKPFLKSGKYSAIVARHDPHLENKTAKEGYVAGPFTRVQFRRMNLGSDDEVKKYLLDAGWIPEEWNYKKDPKTKRNLKDNNGKIIPTSPKLSQSDPFIGVDGKVGRLLAKFIQVRHRLSLIQGILKRVRPDGTVGQVITGIAATGRLKHSVIVNIPGGDSFYGKQCRKIFKAPDGYRIVGTDASSC…	1	yes	PSC-1__KF302037.1___Pseudoalteromonas__phage__HP1_gene_1	VOG0026	155.2	1.72e-26	Bacteria	DNA polymerase [n=254]; DNA polymerase I [n=240]; putative DNA polymerase [n=99]; No annotation provided [n=38]; hypothetical protein [n=33]; gp45 [n=22]; putative DNA polymerase I [n=21]; DNA polymerase II [n=14]; gp44 [n=13]; gp60 [n=11]; DNA polymerase A [n=10]; gp62 [n=10]; DNA polymerase 1 [n=7]; gp59 [n=7]; gp43 [n=7]; gp5 [n=7]; putative DNA polymerase A [n=6]; PolA [n=6]; putative T7-like…	VOG00029	201.8	3.65e-35	XhXr	sp|P00581|DPOL_BPT7 DNA-directed DNA polymerase	phrog_15971	132.9	1.63e-21	DNA polymerase I	DNA, RNA and nucleotide metabolism	cluster023631	3.6e-269	898.2	0	1	NA	cluster11830	1.9e-281	936.1	0	1	' DNA polymerase'=5; 'POLAc domain-containing protein '=1; 'DNA polymerase'=6; 'DNA polymerase family A '=5; 'Putative DNA polymerase '=2; 'T7-like DNA polymerase '=1; 'DNA-directed DNA polymerase; family A; palm domain '=1; 'No Annotation Found'=1; ' DNA-directed DNA polymerase'=1; 'Ribonuclease H-like domain protein '=1;	Pfam	PF00476	DNA polymerase family A	255	635	2.4E-22	44	1	9
KP774835.2___Citrobacter__phage__CVT22	gene_41	28441	30348	1908	-1	0	KP774835.2___Citrobacter__phage__CVT22_gene_41	prot_621	636	MNVKVRVADIEANGLNPDTIHCMVFSSLDKKEIDKFEPHQMKEALEFLDTVDVLIGHNILSYDLPAIRKVLRYEYKGKRVDTLLMSRLQQPNRQPPPNARGDAKAMRSPHGLGCWGYRVGRGKPEHEDWDNYSPEMLHRCTEDVMINVDVYHALMEEGRGTPWREAHLMTFELFENLNKQQQAGWRLDIPHVQKAIHMIEHWTRRIDKMLEPTLPYITKCLEKKVKGSDDLNYVKRVFLKSGKYDASVIKHFGDDAHLVAAPFSRVELRKIKLGSDQEVKDYLLTQGWIPDAWNTDDAGNRTSPKLNKDTTFEGVSGVGGKLIVLRSQINDRASIMRGYLNNVREDGRLESIVTALADTRRMKHAQIVNVPNADALLGPMMRKCFIARDGFKLVGCDAA…	1	yes	PSC-1__KP774835.2___Citrobacter__phage__CVT22_gene_41	VOG0026	143.7	2.97e-24	Bacteria	DNA polymerase [n=254]; DNA polymerase I [n=240]; putative DNA polymerase [n=99]; No annotation provided [n=38]; hypothetical protein [n=33]; gp45 [n=22]; putative DNA polymerase I [n=21]; DNA polymerase II [n=14]; gp44 [n=13]; gp60 [n=11]; DNA polymerase A [n=10]; gp62 [n=10]; DNA polymerase 1 [n=7]; gp59 [n=7]; gp43 [n=7]; gp5 [n=7]; putative DNA polymerase A [n=6]; PolA [n=6]; putative T7-like…	VOG00029	210.1	8.98e-37	XhXr	sp|P00581|DPOL_BPT7 DNA-directed DNA polymerase	phrog_17	143	1.67e-23	DNA polymerase	DNA, RNA and nucleotide metabolism	cluster023631	6.2e-234	781.8	0.8	1	NA	cluster11830	1.6e-229	764.6	0.9	1	' DNA polymerase'=5; 'POLAc domain-containing protein '=1; 'DNA polymerase'=6; 'DNA polymerase family A '=5; 'Putative DNA polymerase '=2; 'T7-like DNA polymerase '=1; 'DNA-directed DNA polymerase; family A; palm domain '=1; 'No Annotation Found'=1; ' DNA-directed DNA polymerase'=1; 'Ribonuclease H-like domain protein '=1;	Pfam	PF00476	DNA polymerase family A	270	633	2.0E-22	44	1	9
DQ163915.1___Bacteriophage__PA11	gene_14	9531	11405	1875	1	0	DQ163915.1___Bacteriophage__PA11_gene_14	prot_145	625	LIDIFDIEADGLKPTKIHCLSVMKNGKLFSTTDYDKMRSFFRNAKIIGGHNIYRYDIPNIERLLDIKVECKLVDTLPLSWYLEPARKRHGLAEWGEEFGVPKPKVDDWENLAVEEYIHRCEEDVKINTKLWERQWKQLSKLYGEPDKVWKFIDYIMFKMDCAAEQERSRWKLDVVHCKTTLKKLEKLKEEKVEELRLAMPHVPVMASKEKPKKMYLKNKPNTLSEQGKAWVALLEEQGLPEDYEGVVEYIKDWKEPNPGSHEQIKSWLYSLGWVPETFAYKRNKETGEVKKIEQVQQDKTLGPGLCASVKKLYGKEPKLEILDGLSILTHRISVLNGFLNNVDDEGYVQAKVQGLTNTLRFKHEVVVNLPGVDKPYGADIRGCLVAPKGYELVGSDMSS…	1	yes	PSC-1__DQ163915.1___Bacteriophage__PA11_gene_14	VOG0026	141.8	7.19e-24	Bacteria	DNA polymerase [n=254]; DNA polymerase I [n=240]; putative DNA polymerase [n=99]; No annotation provided [n=38]; hypothetical protein [n=33]; gp45 [n=22]; putative DNA polymerase I [n=21]; DNA polymerase II [n=14]; gp44 [n=13]; gp60 [n=11]; DNA polymerase A [n=10]; gp62 [n=10]; DNA polymerase 1 [n=7]; gp59 [n=7]; gp43 [n=7]; gp5 [n=7]; putative DNA polymerase A [n=6]; PolA [n=6]; putative T7-like…	VOG00029	206.8	3.95e-36	XhXr	sp|P00581|DPOL_BPT7 DNA-directed DNA polymerase	phrog_17	132.2	2.15e-21	DNA polymerase	DNA, RNA and nucleotide metabolism	cluster018250	0	1016.7	3.6	1	NA	cluster09288	1.9e-260	866.6	2.4	1	NA	Pfam	PF00476	DNA polymerase family A	256	621	2.2E-16	78	1	73
JQ446452.1___Salinivibrio__phage__CW02	gene_24	10919	12808	1890	1	0	JQ446452.1___Salinivibrio__phage__CW02_gene_24	prot_357	630	MDKPIVFDIEADGLEDASKIHVLSARVGKKTFSTPDYGNIKTFLGRASVLVGHNIIRYDIPTLERILGVRVRAKLVDTLALSWYLYPFRVKHGLADWGEDLGFGKPKVEDWVGQPYEVYENRCESDVEINTRLWEKMWKDLMKLYNQDESEVWRLIDYLSFKMDCAREQERSRWRLDQDKANAVEDKLSKDYEDVRERLYKVMPKVPVQTTKTVPKKPYKQDGSLSAIGEKWFSLLEDLGKHPSTKEVTYVSGHEEPNPGSDVQIKNWLFSLGWKPCTFKYKRNKETGEVKEIPQIRTKNSNNEPILTPSVEVLCGKVPELEYLREIGVVKHRLDVVRGFLRSVDDEGFIKARISGFTNTLRFKHQEVVNLPGVDKPYGPDLRGCLIAREGYELLGSDM…	1	yes	PSC-1__JQ446452.1___Salinivibrio__phage__CW02_gene_24	VOG0026	145.7	1.25e-24	Bacteria	DNA polymerase [n=254]; DNA polymerase I [n=240]; putative DNA polymerase [n=99]; No annotation provided [n=38]; hypothetical protein [n=33]; gp45 [n=22]; putative DNA polymerase I [n=21]; DNA polymerase II [n=14]; gp44 [n=13]; gp60 [n=11]; DNA polymerase A [n=10]; gp62 [n=10]; DNA polymerase 1 [n=7]; gp59 [n=7]; gp43 [n=7]; gp5 [n=7]; putative DNA polymerase A [n=6]; PolA [n=6]; putative T7-like…	VOG00029	208.3	1.97e-36	XhXr	sp|P00581|DPOL_BPT7 DNA-directed DNA polymerase	phrog_17	132.8	1.68e-21	DNA polymerase	DNA, RNA and nucleotide metabolism	cluster018250	1.8e-287	958.5	0.2	1	NA	cluster09288	4.2e-252	839	0.1	1	NA	Pfam	PF00476	DNA polymerase family A	247	626	5.2E-16	78	1	73
AY095314.2___Vibriophage__VpV262	gene_21	8943	10928	1986	1	0	AY095314.2___Vibriophage__VpV262_gene_21	prot_079	662	MSELKDYSEYLPKFLLDLDPEIYLSMNFLVLDLETDTDGDERSPDATWEQNDIVSASWVFGTGGRGTEKFVYGGIHDMDELIQDMYEADFVVAHNAKFDIKWLIRAGLDPSRILVADTMLAEYVLTGNLKAGKKGALTLGALAKQYLGVTKDPLVDKLMRGGVSPRVIPKSLLERRNKSDIFQTRNLWLKLRDEMMERDVIHLFYNRCLLSPVLADIELNGVHLDKERVCEEHDIASRRMAEVEADLMDMIDGRNPRSVPQMQEFIYDVLKFKPLKKRGVEWRPTGEEVLQFEARTKKQQAFLDLKKEFAQLNADLSKNLDYFYGVVTEREDCLFYAQFNQAQTVTHRLSSSGIKTKFEMYPKAKSIQLQNSPRKYKRLYSARNPDWYVIEMDGAQIEF…	1	yes	PSC-1__AY095314.2___Vibriophage__VpV262_gene_21	VOG0026	172.3	7.75e-30	Bacteria	DNA polymerase [n=254]; DNA polymerase I [n=240]; putative DNA polymerase [n=99]; No annotation provided [n=38]; hypothetical protein [n=33]; gp45 [n=22]; putative DNA polymerase I [n=21]; DNA polymerase II [n=14]; gp44 [n=13]; gp60 [n=11]; DNA polymerase A [n=10]; gp62 [n=10]; DNA polymerase 1 [n=7]; gp59 [n=7]; gp43 [n=7]; gp5 [n=7]; putative DNA polymerase A [n=6]; PolA [n=6]; putative T7-like…	VOG00029	208	2.26e-36	XhXr	sp|P00581|DPOL_BPT7 DNA-directed DNA polymerase	phrog_17	157	3.05e-26	DNA polymerase	DNA, RNA and nucleotide metabolism	cluster013288	3.3e-203	680.1	0	1	NA	cluster26723	1.1e-126	424.5	0	1	' DNA polymerase I; K02335 DNA polymerase I [EC:2.7.7.7]'=2; 'POLAc domain-containing protein '=2; 'DNA polymerase'=2; 'DNA polymerase family A '=2;	Pfam	PF01612	3'-5' exonuclease	91	152	9.2E-6	59	1	171
AY095314.2___Vibriophage__VpV262	gene_21	8943	10928	1986	1	0	AY095314.2___Vibriophage__VpV262_gene_21	prot_079	662	MSELKDYSEYLPKFLLDLDPEIYLSMNFLVLDLETDTDGDERSPDATWEQNDIVSASWVFGTGGRGTEKFVYGGIHDMDELIQDMYEADFVVAHNAKFDIKWLIRAGLDPSRILVADTMLAEYVLTGNLKAGKKGALTLGALAKQYLGVTKDPLVDKLMRGGVSPRVIPKSLLERRNKSDIFQTRNLWLKLRDEMMERDVIHLFYNRCLLSPVLADIELNGVHLDKERVCEEHDIASRRMAEVEADLMDMIDGRNPRSVPQMQEFIYDVLKFKPLKKRGVEWRPTGEEVLQFEARTKKQQAFLDLKKEFAQLNADLSKNLDYFYGVVTEREDCLFYAQFNQAQTVTHRLSSSGIKTKFEMYPKAKSIQLQNSPRKYKRLYSARNPDWYVIEMDGAQIEF…	1	yes	PSC-1__AY095314.2___Vibriophage__VpV262_gene_21	VOG0026	172.3	7.75e-30	Bacteria	DNA polymerase [n=254]; DNA polymerase I [n=240]; putative DNA polymerase [n=99]; No annotation provided [n=38]; hypothetical protein [n=33]; gp45 [n=22]; putative DNA polymerase I [n=21]; DNA polymerase II [n=14]; gp44 [n=13]; gp60 [n=11]; DNA polymerase A [n=10]; gp62 [n=10]; DNA polymerase 1 [n=7]; gp59 [n=7]; gp43 [n=7]; gp5 [n=7]; putative DNA polymerase A [n=6]; PolA [n=6]; putative T7-like…	VOG00029	208	2.26e-36	XhXr	sp|P00581|DPOL_BPT7 DNA-directed DNA polymerase	phrog_17	157	3.05e-26	DNA polymerase	DNA, RNA and nucleotide metabolism	cluster013288	3.3e-203	680.1	0	1	NA	cluster26723	1.1e-126	424.5	0	1	' DNA polymerase I; K02335 DNA polymerase I [EC:2.7.7.7]'=2; 'POLAc domain-containing protein '=2; 'DNA polymerase'=2; 'DNA polymerase family A '=2;	PRINTS	PR00868	DNA-polymerase family A (pol I) signature	554	567	4.2E-8	59	1	171
AY095314.2___Vibriophage__VpV262	gene_21	8943	10928	1986	1	0	AY095314.2___Vibriophage__VpV262_gene_21	prot_079	662	MSELKDYSEYLPKFLLDLDPEIYLSMNFLVLDLETDTDGDERSPDATWEQNDIVSASWVFGTGGRGTEKFVYGGIHDMDELIQDMYEADFVVAHNAKFDIKWLIRAGLDPSRILVADTMLAEYVLTGNLKAGKKGALTLGALAKQYLGVTKDPLVDKLMRGGVSPRVIPKSLLERRNKSDIFQTRNLWLKLRDEMMERDVIHLFYNRCLLSPVLADIELNGVHLDKERVCEEHDIASRRMAEVEADLMDMIDGRNPRSVPQMQEFIYDVLKFKPLKKRGVEWRPTGEEVLQFEARTKKQQAFLDLKKEFAQLNADLSKNLDYFYGVVTEREDCLFYAQFNQAQTVTHRLSSSGIKTKFEMYPKAKSIQLQNSPRKYKRLYSARNPDWYVIEMDGAQIEF…	1	yes	PSC-1__AY095314.2___Vibriophage__VpV262_gene_21	VOG0026	172.3	7.75e-30	Bacteria	DNA polymerase [n=254]; DNA polymerase I [n=240]; putative DNA polymerase [n=99]; No annotation provided [n=38]; hypothetical protein [n=33]; gp45 [n=22]; putative DNA polymerase I [n=21]; DNA polymerase II [n=14]; gp44 [n=13]; gp60 [n=11]; DNA polymerase A [n=10]; gp62 [n=10]; DNA polymerase 1 [n=7]; gp59 [n=7]; gp43 [n=7]; gp5 [n=7]; putative DNA polymerase A [n=6]; PolA [n=6]; putative T7-like…	VOG00029	208	2.26e-36	XhXr	sp|P00581|DPOL_BPT7 DNA-directed DNA polymerase	phrog_17	157	3.05e-26	DNA polymerase	DNA, RNA and nucleotide metabolism	cluster013288	3.3e-203	680.1	0	1	NA	cluster26723	1.1e-126	424.5	0	1	' DNA polymerase I; K02335 DNA polymerase I [EC:2.7.7.7]'=2; 'POLAc domain-containing protein '=2; 'DNA polymerase'=2; 'DNA polymerase family A '=2;	PRINTS	PR00868	DNA-polymerase family A (pol I) signature	418	431	4.2E-8	59	1	171
AY095314.2___Vibriophage__VpV262	gene_21	8943	10928	1986	1	0	AY095314.2___Vibriophage__VpV262_gene_21	prot_079	662	MSELKDYSEYLPKFLLDLDPEIYLSMNFLVLDLETDTDGDERSPDATWEQNDIVSASWVFGTGGRGTEKFVYGGIHDMDELIQDMYEADFVVAHNAKFDIKWLIRAGLDPSRILVADTMLAEYVLTGNLKAGKKGALTLGALAKQYLGVTKDPLVDKLMRGGVSPRVIPKSLLERRNKSDIFQTRNLWLKLRDEMMERDVIHLFYNRCLLSPVLADIELNGVHLDKERVCEEHDIASRRMAEVEADLMDMIDGRNPRSVPQMQEFIYDVLKFKPLKKRGVEWRPTGEEVLQFEARTKKQQAFLDLKKEFAQLNADLSKNLDYFYGVVTEREDCLFYAQFNQAQTVTHRLSSSGIKTKFEMYPKAKSIQLQNSPRKYKRLYSARNPDWYVIEMDGAQIEF…	1	yes	PSC-1__AY095314.2___Vibriophage__VpV262_gene_21	VOG0026	172.3	7.75e-30	Bacteria	DNA polymerase [n=254]; DNA polymerase I [n=240]; putative DNA polymerase [n=99]; No annotation provided [n=38]; hypothetical protein [n=33]; gp45 [n=22]; putative DNA polymerase I [n=21]; DNA polymerase II [n=14]; gp44 [n=13]; gp60 [n=11]; DNA polymerase A [n=10]; gp62 [n=10]; DNA polymerase 1 [n=7]; gp59 [n=7]; gp43 [n=7]; gp5 [n=7]; putative DNA polymerase A [n=6]; PolA [n=6]; putative T7-like…	VOG00029	208	2.26e-36	XhXr	sp|P00581|DPOL_BPT7 DNA-directed DNA polymerase	phrog_17	157	3.05e-26	DNA polymerase	DNA, RNA and nucleotide metabolism	cluster013288	3.3e-203	680.1	0	1	NA	cluster26723	1.1e-126	424.5	0	1	' DNA polymerase I; K02335 DNA polymerase I [EC:2.7.7.7]'=2; 'POLAc domain-containing protein '=2; 'DNA polymerase'=2; 'DNA polymerase family A '=2;	PRINTS	PR00868	DNA-polymerase family A (pol I) signature	335	357	4.2E-8	59	1	171
AY095314.2___Vibriophage__VpV262	gene_21	8943	10928	1986	1	0	AY095314.2___Vibriophage__VpV262_gene_21	prot_079	662	MSELKDYSEYLPKFLLDLDPEIYLSMNFLVLDLETDTDGDERSPDATWEQNDIVSASWVFGTGGRGTEKFVYGGIHDMDELIQDMYEADFVVAHNAKFDIKWLIRAGLDPSRILVADTMLAEYVLTGNLKAGKKGALTLGALAKQYLGVTKDPLVDKLMRGGVSPRVIPKSLLERRNKSDIFQTRNLWLKLRDEMMERDVIHLFYNRCLLSPVLADIELNGVHLDKERVCEEHDIASRRMAEVEADLMDMIDGRNPRSVPQMQEFIYDVLKFKPLKKRGVEWRPTGEEVLQFEARTKKQQAFLDLKKEFAQLNADLSKNLDYFYGVVTEREDCLFYAQFNQAQTVTHRLSSSGIKTKFEMYPKAKSIQLQNSPRKYKRLYSARNPDWYVIEMDGAQIEF…	1	yes	PSC-1__AY095314.2___Vibriophage__VpV262_gene_21	VOG0026	172.3	7.75e-30	Bacteria	DNA polymerase [n=254]; DNA polymerase I [n=240]; putative DNA polymerase [n=99]; No annotation provided [n=38]; hypothetical protein [n=33]; gp45 [n=22]; putative DNA polymerase I [n=21]; DNA polymerase II [n=14]; gp44 [n=13]; gp60 [n=11]; DNA polymerase A [n=10]; gp62 [n=10]; DNA polymerase 1 [n=7]; gp59 [n=7]; gp43 [n=7]; gp5 [n=7]; putative DNA polymerase A [n=6]; PolA [n=6]; putative T7-like…	VOG00029	208	2.26e-36	XhXr	sp|P00581|DPOL_BPT7 DNA-directed DNA polymerase	phrog_17	157	3.05e-26	DNA polymerase	DNA, RNA and nucleotide metabolism	cluster013288	3.3e-203	680.1	0	1	NA	cluster26723	1.1e-126	424.5	0	1	' DNA polymerase I; K02335 DNA polymerase I [EC:2.7.7.7]'=2; 'POLAc domain-containing protein '=2; 'DNA polymerase'=2; 'DNA polymerase family A '=2;	PRINTS	PR00868	DNA-polymerase family A (pol I) signature	388	411	4.2E-8	59	1	171
AY095314.2___Vibriophage__VpV262	gene_21	8943	10928	1986	1	0	AY095314.2___Vibriophage__VpV262_gene_21	prot_079	662	MSELKDYSEYLPKFLLDLDPEIYLSMNFLVLDLETDTDGDERSPDATWEQNDIVSASWVFGTGGRGTEKFVYGGIHDMDELIQDMYEADFVVAHNAKFDIKWLIRAGLDPSRILVADTMLAEYVLTGNLKAGKKGALTLGALAKQYLGVTKDPLVDKLMRGGVSPRVIPKSLLERRNKSDIFQTRNLWLKLRDEMMERDVIHLFYNRCLLSPVLADIELNGVHLDKERVCEEHDIASRRMAEVEADLMDMIDGRNPRSVPQMQEFIYDVLKFKPLKKRGVEWRPTGEEVLQFEARTKKQQAFLDLKKEFAQLNADLSKNLDYFYGVVTEREDCLFYAQFNQAQTVTHRLSSSGIKTKFEMYPKAKSIQLQNSPRKYKRLYSARNPDWYVIEMDGAQIEF…	1	yes	PSC-1__AY095314.2___Vibriophage__VpV262_gene_21	VOG0026	172.3	7.75e-30	Bacteria	DNA polymerase [n=254]; DNA polymerase I [n=240]; putative DNA polymerase [n=99]; No annotation provided [n=38]; hypothetical protein [n=33]; gp45 [n=22]; putative DNA polymerase I [n=21]; DNA polymerase II [n=14]; gp44 [n=13]; gp60 [n=11]; DNA polymerase A [n=10]; gp62 [n=10]; DNA polymerase 1 [n=7]; gp59 [n=7]; gp43 [n=7]; gp5 [n=7]; putative DNA polymerase A [n=6]; PolA [n=6]; putative T7-like…	VOG00029	208	2.26e-36	XhXr	sp|P00581|DPOL_BPT7 DNA-directed DNA polymerase	phrog_17	157	3.05e-26	DNA polymerase	DNA, RNA and nucleotide metabolism	cluster013288	3.3e-203	680.1	0	1	NA	cluster26723	1.1e-126	424.5	0	1	' DNA polymerase I; K02335 DNA polymerase I [EC:2.7.7.7]'=2; 'POLAc domain-containing protein '=2; 'DNA polymerase'=2; 'DNA polymerase family A '=2;	Pfam	PF00476	DNA polymerase family A	233	614	2.3E-32	59	1	171
DQ163915.1___Bacteriophage__PA11	gene_22	14522	15289	768	1	0	DQ163915.1___Bacteriophage__PA11_gene_22	prot_153	256	MPNIYIIDIETAPKVAYVWRFFKEMIGAKQVLDHGHIMSFAAKKLGSDDIIYVENRKDDDKYITQELISVLDDADIVVAHNGDKFDLPTINGRALVHGLKPPSPYKTVDTLKVAHREFKFERNNLEYLAHVLGCAPKEGHAKFPGFELWLECLRQNEEAWAEMRKYNIQDVLTLEEVYTKMRPWIRNHPNVGVLKEEHDTVCPKCGSARLVHRGYATTSVGKYQRYRCSDCGGWSRSRFSVYPKEKRKALLVNAV	1	yes	PSC-1__DQ163915.1___Bacteriophage__PA11_gene_22	VOG1255	390.5	1.79e-72	Bacteria	hypothetical protein [n=45]; DnaQ-like exonuclease [n=28]; No annotation provided [n=19]; gp35 [n=17]; DnaQ-like protein [n=16]; DNA polymerase [n=8]; exonuclease [n=6]; gp114 [n=5]; putative DNA polymerase/exonuclease [n=5]; 3'-5' exonuclease [n=5]; putative DNA polymerase [n=4]; gp112 [n=4]; gp37 [n=4]; putative exonuclease [n=4]; DNA polymerase part I [n=3]; DNA polymerase III subunit [n=3]; g…	VOG00773	408.2	1.71e-75	XhXr	sp|P00581|DPOL_BPT7 DNA-directed DNA polymerase	phrog_403	409.7	1.28e-75	DNA polymerase exonuclease subunit	DNA, RNA and nucleotide metabolism	cluster010294	4.2e-125	419.8	0	1	NA	cluster04220	3.7e-109	365	0	1	NA	Pfam	PF13482	RNase_H superfamily	52	181	1.3E-12	35	1	29
JQ446452.1___Salinivibrio__phage__CW02	gene_32	16001	16771	771	1	0	JQ446452.1___Salinivibrio__phage__CW02_gene_32	prot_365	257	MKTKTLIIDIETAPTLAYVWRSFKENIGLKQIVENPYIMSFAAKWLDGDEVMYMENRHGDDREVVSAIFNLFDEADLVVAHNAKKFDIPTIRGRGLVLGLKPYSPIKIVDTLLIAKREFRLFQNNLAYIAQLLDCADKEEHKEFPGFELWLQCLKQNDAAWQEMKVYNIQDTLTLEQVYLKMRPYASAHPNVAVKEESAQPLCPKCGSHHIHFRGYYNTNVGKYRKFQCQDCGGWGRTRFTEYPKDIKKELMTNAI	1	yes	PSC-1__JQ446452.1___Salinivibrio__phage__CW02_gene_32	VOG1255	370.9	1.22e-68	Bacteria	hypothetical protein [n=45]; DnaQ-like exonuclease [n=28]; No annotation provided [n=19]; gp35 [n=17]; DnaQ-like protein [n=16]; DNA polymerase [n=8]; exonuclease [n=6]; gp114 [n=5]; putative DNA polymerase/exonuclease [n=5]; 3'-5' exonuclease [n=5]; putative DNA polymerase [n=4]; gp112 [n=4]; gp37 [n=4]; putative exonuclease [n=4]; DNA polymerase part I [n=3]; DNA polymerase III subunit [n=3]; g…	VOG00773	383	1.42e-70	XhXr	sp|P00581|DPOL_BPT7 DNA-directed DNA polymerase	phrog_403	391.6	4.48e-72	DNA polymerase exonuclease subunit	DNA, RNA and nucleotide metabolism	cluster010294	5.3e-119	399.8	0.2	1	NA	cluster04220	4.7e-100	335.2	0.1	1	NA	Pfam	PF13482	RNase_H superfamily	38	181	2.2E-7	35	1	29
KC751414.1___Pseudoalteromonas__phage__RIO_1	gene_32	19433	20188	756	1	0	KC751414.1___Pseudoalteromonas__phage__RIO_1_gene_32	prot_496	252	MKTLIIDIETAPSIAYVWQMWKANIGLNQVEERGYLMSYAAKWLGSDETFYNENRHGNDKGLVEEIIQLFDEADVVIAHNADKFDVPTVNARAIFHGIPPNSPFRTIDTLKVAKARFRFERNSLAFLSKYLGVQEKLSHTTFPGFELWLQCLKQNDDAWHEMKVYNIQDVDTLEQVYTRLRPWIKNPPSHGVYTDEQVCPNCGGKHLHKRGTYSTNISTFQRFKCLDCGSWSRARQNIRNKEAVKASLVGV	1	yes	PSC-1__KC751414.1___Pseudoalteromonas__phage__RIO_1_gene_32	VOG1255	378.2	4.59e-70	Bacteria	hypothetical protein [n=45]; DnaQ-like exonuclease [n=28]; No annotation provided [n=19]; gp35 [n=17]; DnaQ-like protein [n=16]; DNA polymerase [n=8]; exonuclease [n=6]; gp114 [n=5]; putative DNA polymerase/exonuclease [n=5]; 3'-5' exonuclease [n=5]; putative DNA polymerase [n=4]; gp112 [n=4]; gp37 [n=4]; putative exonuclease [n=4]; DNA polymerase part I [n=3]; DNA polymerase III subunit [n=3]; g…	VOG00773	381.9	2.33e-70	XhXr	sp|P00581|DPOL_BPT7 DNA-directed DNA polymerase	phrog_403	390	8.99e-72	DNA polymerase exonuclease subunit	DNA, RNA and nucleotide metabolism	cluster010294	4.8e-114	383.6	0.1	1	NA	cluster04220	5.3e-111	371	0.1	1	NA	Pfam	PF13482	RNase_H superfamily	49	180	2.0E-9	35	1	29
KF302037.1___Pseudoalteromonas__phage__HP1	gene_9	4863	5618	756	1	0	KF302037.1___Pseudoalteromonas__phage__HP1_gene_9	prot_530	252	MKTLIIDIETAPSIAYVWQMWKANIGLNQVEERGYLMSYAAKWLGSDETFYNENRHGNDKGLVEEIIQLFDEADVVIAHNADKFDVPTVNARAIFHGIPPNSPFRTIDTLKVAKARFRFERNSLAFLSKYLGVQEKLSHTTFPGFELWLQCLKQNDEAWHEMKVYNIQDVDTLEQVYMRLRPWIKNPPSHGVYTDEQVCPNCGGKHLHKRGTYSTNISTFQRFKCLDCGGWSRARQNIRNKEAVKASLVGV	1	yes	PSC-1__KF302037.1___Pseudoalteromonas__phage__HP1_gene_9	VOG1255	381.8	8.75e-71	Bacteria	hypothetical protein [n=45]; DnaQ-like exonuclease [n=28]; No annotation provided [n=19]; gp35 [n=17]; DnaQ-like protein [n=16]; DNA polymerase [n=8]; exonuclease [n=6]; gp114 [n=5]; putative DNA polymerase/exonuclease [n=5]; 3'-5' exonuclease [n=5]; putative DNA polymerase [n=4]; gp112 [n=4]; gp37 [n=4]; putative exonuclease [n=4]; DNA polymerase part I [n=3]; DNA polymerase III subunit [n=3]; g…	VOG00773	385.5	4.53e-71	XhXr	sp|P00581|DPOL_BPT7 DNA-directed DNA polymerase	phrog_403	395.4	7.88e-73	DNA polymerase exonuclease subunit	DNA, RNA and nucleotide metabolism	cluster010294	6.1e-116	389.8	0.1	1	NA	cluster04220	1.9e-111	372.5	0	1	NA	Pfam	PF13482	RNase_H superfamily	49	180	3.0E-9	35	1	29
KP774835.2___Citrobacter__phage__CVT22	gene_29	23671	24609	939	-1	0	KP774835.2___Citrobacter__phage__CVT22_gene_29	prot_609	313	MNYTNEQIAKVIELKKKGFSHRLISEEVFKRRTAASSVFYILAEHYYGKKEKAPENAVQALIIDIETAPELAYVWGRWRQNVAPNQVVQRSYMLSWAAKRLGSDEVFADALPFYGDYKAGDVNDYNIVKSLWELLDKADIVIAHNAIKFDLAYANTRFAFHGLGMPSPYKVIDTLQVAKKQFKFAANSLKELIAFFGFEEDKMANQMETWIGCMNGDADAWNYMVEYNKRDITTLENVYLKLRPYDKQHPNVALYADGDDVACPCCGDKRITVLEKNAYTMQSAFESYRCKGCLHVFRSTKRIKGIKIAHAI	1	yes	PSC-1__KP774835.2___Citrobacter__phage__CVT22_gene_29	VOG1255	326.9	4.71e-60	Bacteria	hypothetical protein [n=45]; DnaQ-like exonuclease [n=28]; No annotation provided [n=19]; gp35 [n=17]; DnaQ-like protein [n=16]; DNA polymerase [n=8]; exonuclease [n=6]; gp114 [n=5]; putative DNA polymerase/exonuclease [n=5]; 3'-5' exonuclease [n=5]; putative DNA polymerase [n=4]; gp112 [n=4]; gp37 [n=4]; putative exonuclease [n=4]; DNA polymerase part I [n=3]; DNA polymerase III subunit [n=3]; g…	VOG00773	352.3	1.45e-64	XhXr	sp|P00581|DPOL_BPT7 DNA-directed DNA polymerase	phrog_403	359.9	6.85e-66	DNA polymerase exonuclease subunit	DNA, RNA and nucleotide metabolism	cluster072473	1.2e-84	287.4	0.8	1	NA	cluster04220	3.9e-78	263.3	0.5	1.1	NA	Pfam	PF13482	RNase_H superfamily	123	242	8.1E-8	35	1	29
EnvX___Montereybay__phage__JGI26117J46588_1000006	gene_15	4804	5700	897	1	0	EnvX___Montereybay__phage__JGI26117J46588_1000006_gene_15	prot_216	299	MKILAMDIETDALDATKIHVICAQDVDTNEKYQFLNVCTIPEEREAFFLLCQQTDKFIFHNGIGFDVKVINRLLQPNLINPSDVIDTLIMSRLIDYSIKGGHSLKAWGQRLGEFKVGFDQFEVLTQEMVDYCHQDVEVTVRLYNKFKSSIFDPDLQDAIKCEHDIQILCEEMTDAGFYFEKDKAEHLLDEVELRMIELTESFQRDFPPQLEEVNRIKYRKKQDGTTMASVKKAQEKYFKTTVDWSVNPPDLVCYDWIEFNPASPKMRIERLWEAGWQPYEKTKGHIQYDREQKQRSWR	1	yes	PSC-1__EnvX___Montereybay__phage__JGI26117J46588_1000006_gene_15	VOG1255	97.3	3.47e-15	Bacteria	hypothetical protein [n=45]; DnaQ-like exonuclease [n=28]; No annotation provided [n=19]; gp35 [n=17]; DnaQ-like protein [n=16]; DNA polymerase [n=8]; exonuclease [n=6]; gp114 [n=5]; putative DNA polymerase/exonuclease [n=5]; 3'-5' exonuclease [n=5]; putative DNA polymerase [n=4]; gp112 [n=4]; gp37 [n=4]; putative exonuclease [n=4]; DNA polymerase part I [n=3]; DNA polymerase III subunit [n=3]; g…	VOG00029	104.1	4.48e-16	XhXr	sp|P00581|DPOL_BPT7 DNA-directed DNA polymerase	phrog_17	75.9	2.24e-10	DNA polymerase	DNA, RNA and nucleotide metabolism	cluster020578	3.5e-187	624.5	5.3	1	NA	cluster07343	2.8e-172	573	6	1	NA	Pfam	PF01612	3'-5' exonuclease	2	148	1.2E-7	10	1	87
MF431616.1___Lentibacter__virus__vB_LenP_ICBM2	gene_11	4793	5707	915	1	0	MF431616.1___Lentibacter__virus__vB_LenP_ICBM2_gene_11	prot_732	305	MRTLALDIETDALDAKRIWVICAQDIETEDRMQFLNVDTQLNERRRFIDTLRDYDRFVLHNGIGFDIPVVNKIIGENTIDPEKVLDTLIVSRLIDFTLDGKGHSLRAWGQRLGEFKIGFNDFSMLTQEMIDYCHQDVEVTVKLYKKFKSVIEDPEWHDAIRVEHDIQILCEQMKADGFLFKEDKAEEMLGEILTRMDELNQGFQVDFPPKLEVVNTINYRRKADGSLYSNVVKAHEKYERTEVDWSVTPAQLLCYDYVAFNPASPKQRIDRLWEAGWTPYEKTKGHLEYDRDKQRQNKRRYSRR	1	yes	PSC-1__MF431616.1___Lentibacter__virus__vB_LenP_ICBM2_gene_11	VOG1255	93.8	1.71e-14	Bacteria	hypothetical protein [n=45]; DnaQ-like exonuclease [n=28]; No annotation provided [n=19]; gp35 [n=17]; DnaQ-like protein [n=16]; DNA polymerase [n=8]; exonuclease [n=6]; gp114 [n=5]; putative DNA polymerase/exonuclease [n=5]; 3'-5' exonuclease [n=5]; putative DNA polymerase [n=4]; gp112 [n=4]; gp37 [n=4]; putative exonuclease [n=4]; DNA polymerase part I [n=3]; DNA polymerase III subunit [n=3]; g…	VOG00029	97.1	1.07e-14	XhXr	sp|P00581|DPOL_BPT7 DNA-directed DNA polymerase	phrog_403	75.9	2.16e-10	DNA polymerase exonuclease subunit	DNA, RNA and nucleotide metabolism	cluster037929	9.2e-148	495.1	3.8	1	NA	cluster07343	4.6e-151	503.3	3.7	1	NA	Pfam	PF01612	3'-5' exonuclease	3	151	4.8E-7	10	1	87
EnvX___Montereybay__phage__JGI26117J46588_1000006	gene_16	5666	6697	1032	1	0	EnvX___Montereybay__phage__JGI26117J46588_1000006_gene_16	prot_217	344	MIENKNKDRGDKFARYGWTLSEANLETLPDEAPAGGKRLAEWLTLEGRRSSLVEWLGHCGDDHRIHGRFTHLGAWTGRMAHSAPNQANIPSEFHGTPKSAVEEVKARYDGQFRALWGVEKGNYLVGTDAEGIQLRVLAHLMKSEEYVDAIVSGKKENETDIHNLNKKALGMSHITRDDAKTFIYAFLLGAGTAKIAQILRVNQREASQCVENFMQSIQGLANLKKKVIPHIAKRGWFKGMDGRKVLVPSEHKTLAGMLQNGESVIMKHSALQWVRQAKDKEIDFKLVTWPHDEWQTEVCGNYATAEELGAMQRQSFVDIGEKFNMVCPLAGSTDIGRNWKDTH	1	yes	PSC-1__EnvX___Montereybay__phage__JGI26117J46588_1000006_gene_16	VOG0026	112.3	4.21e-18	Bacteria	DNA polymerase [n=254]; DNA polymerase I [n=240]; putative DNA polymerase [n=99]; No annotation provided [n=38]; hypothetical protein [n=33]; gp45 [n=22]; putative DNA polymerase I [n=21]; DNA polymerase II [n=14]; gp44 [n=13]; gp60 [n=11]; DNA polymerase A [n=10]; gp62 [n=10]; DNA polymerase 1 [n=7]; gp59 [n=7]; gp43 [n=7]; gp5 [n=7]; putative DNA polymerase A [n=6]; PolA [n=6]; putative T7-like…	VOG00029	144	7.18e-24	XhXr	sp|P00581|DPOL_BPT7 DNA-directed DNA polymerase	phrog_15971	209.2	1.98e-36	DNA polymerase I	DNA, RNA and nucleotide metabolism	cluster008512	8.8e-222	738.8	2.1	1	NA	cluster07333	1e-224	745.9	3.3	1	NA	Pfam	PF00476	DNA polymerase family A	15	340	4.4E-33	10	1	88
EnvX___Montereybay__phage__JGI26117J46588_1000006	gene_16	5666	6697	1032	1	0	EnvX___Montereybay__phage__JGI26117J46588_1000006_gene_16	prot_217	344	MIENKNKDRGDKFARYGWTLSEANLETLPDEAPAGGKRLAEWLTLEGRRSSLVEWLGHCGDDHRIHGRFTHLGAWTGRMAHSAPNQANIPSEFHGTPKSAVEEVKARYDGQFRALWGVEKGNYLVGTDAEGIQLRVLAHLMKSEEYVDAIVSGKKENETDIHNLNKKALGMSHITRDDAKTFIYAFLLGAGTAKIAQILRVNQREASQCVENFMQSIQGLANLKKKVIPHIAKRGWFKGMDGRKVLVPSEHKTLAGMLQNGESVIMKHSALQWVRQAKDKEIDFKLVTWPHDEWQTEVCGNYATAEELGAMQRQSFVDIGEKFNMVCPLAGSTDIGRNWKDTH	1	yes	PSC-1__EnvX___Montereybay__phage__JGI26117J46588_1000006_gene_16	VOG0026	112.3	4.21e-18	Bacteria	DNA polymerase [n=254]; DNA polymerase I [n=240]; putative DNA polymerase [n=99]; No annotation provided [n=38]; hypothetical protein [n=33]; gp45 [n=22]; putative DNA polymerase I [n=21]; DNA polymerase II [n=14]; gp44 [n=13]; gp60 [n=11]; DNA polymerase A [n=10]; gp62 [n=10]; DNA polymerase 1 [n=7]; gp59 [n=7]; gp43 [n=7]; gp5 [n=7]; putative DNA polymerase A [n=6]; PolA [n=6]; putative T7-like…	VOG00029	144	7.18e-24	XhXr	sp|P00581|DPOL_BPT7 DNA-directed DNA polymerase	phrog_15971	209.2	1.98e-36	DNA polymerase I	DNA, RNA and nucleotide metabolism	cluster008512	8.8e-222	738.8	2.1	1	NA	cluster07333	1e-224	745.9	3.3	1	NA	PRINTS	PR00868	DNA-polymerase family A (pol I) signature	285	298	4.3E-5	10	1	88
EnvX___Montereybay__phage__JGI26117J46588_1000006	gene_16	5666	6697	1032	1	0	EnvX___Montereybay__phage__JGI26117J46588_1000006_gene_16	prot_217	344	MIENKNKDRGDKFARYGWTLSEANLETLPDEAPAGGKRLAEWLTLEGRRSSLVEWLGHCGDDHRIHGRFTHLGAWTGRMAHSAPNQANIPSEFHGTPKSAVEEVKARYDGQFRALWGVEKGNYLVGTDAEGIQLRVLAHLMKSEEYVDAIVSGKKENETDIHNLNKKALGMSHITRDDAKTFIYAFLLGAGTAKIAQILRVNQREASQCVENFMQSIQGLANLKKKVIPHIAKRGWFKGMDGRKVLVPSEHKTLAGMLQNGESVIMKHSALQWVRQAKDKEIDFKLVTWPHDEWQTEVCGNYATAEELGAMQRQSFVDIGEKFNMVCPLAGSTDIGRNWKDTH	1	yes	PSC-1__EnvX___Montereybay__phage__JGI26117J46588_1000006_gene_16	VOG0026	112.3	4.21e-18	Bacteria	DNA polymerase [n=254]; DNA polymerase I [n=240]; putative DNA polymerase [n=99]; No annotation provided [n=38]; hypothetical protein [n=33]; gp45 [n=22]; putative DNA polymerase I [n=21]; DNA polymerase II [n=14]; gp44 [n=13]; gp60 [n=11]; DNA polymerase A [n=10]; gp62 [n=10]; DNA polymerase 1 [n=7]; gp59 [n=7]; gp43 [n=7]; gp5 [n=7]; putative DNA polymerase A [n=6]; PolA [n=6]; putative T7-like…	VOG00029	144	7.18e-24	XhXr	sp|P00581|DPOL_BPT7 DNA-directed DNA polymerase	phrog_15971	209.2	1.98e-36	DNA polymerase I	DNA, RNA and nucleotide metabolism	cluster008512	8.8e-222	738.8	2.1	1	NA	cluster07333	1e-224	745.9	3.3	1	NA	PRINTS	PR00868	DNA-polymerase family A (pol I) signature	176	201	4.3E-5	10	1	88
EnvX___Montereybay__phage__JGI26117J46588_1000006	gene_16	5666	6697	1032	1	0	EnvX___Montereybay__phage__JGI26117J46588_1000006_gene_16	prot_217	344	MIENKNKDRGDKFARYGWTLSEANLETLPDEAPAGGKRLAEWLTLEGRRSSLVEWLGHCGDDHRIHGRFTHLGAWTGRMAHSAPNQANIPSEFHGTPKSAVEEVKARYDGQFRALWGVEKGNYLVGTDAEGIQLRVLAHLMKSEEYVDAIVSGKKENETDIHNLNKKALGMSHITRDDAKTFIYAFLLGAGTAKIAQILRVNQREASQCVENFMQSIQGLANLKKKVIPHIAKRGWFKGMDGRKVLVPSEHKTLAGMLQNGESVIMKHSALQWVRQAKDKEIDFKLVTWPHDEWQTEVCGNYATAEELGAMQRQSFVDIGEKFNMVCPLAGSTDIGRNWKDTH	1	yes	PSC-1__EnvX___Montereybay__phage__JGI26117J46588_1000006_gene_16	VOG0026	112.3	4.21e-18	Bacteria	DNA polymerase [n=254]; DNA polymerase I [n=240]; putative DNA polymerase [n=99]; No annotation provided [n=38]; hypothetical protein [n=33]; gp45 [n=22]; putative DNA polymerase I [n=21]; DNA polymerase II [n=14]; gp44 [n=13]; gp60 [n=11]; DNA polymerase A [n=10]; gp62 [n=10]; DNA polymerase 1 [n=7]; gp59 [n=7]; gp43 [n=7]; gp5 [n=7]; putative DNA polymerase A [n=6]; PolA [n=6]; putative T7-like…	VOG00029	144	7.18e-24	XhXr	sp|P00581|DPOL_BPT7 DNA-directed DNA polymerase	phrog_15971	209.2	1.98e-36	DNA polymerase I	DNA, RNA and nucleotide metabolism	cluster008512	8.8e-222	738.8	2.1	1	NA	cluster07333	1e-224	745.9	3.3	1	NA	PRINTS	PR00868	DNA-polymerase family A (pol I) signature	65	87	4.3E-5	10	1	88
MF431616.1___Lentibacter__virus__vB_LenP_ICBM2	gene_12	5658	6704	1047	1	0	MF431616.1___Lentibacter__virus__vB_LenP_ICBM2_gene_12	prot_733	349	MTVTNNDKTKDDIRGAKFARYGWTLSEANLNTLPEDAPEGGKRLAEWLTLEGRRSSLVEWLGHCREDSRIHGSFTHIGAWTGRMAHSNPNEANIPSAFHGTPKTPVEEVKAKYDGAFRDLWHVPEGSWLVGSDAEGIQLRLLAHFMQSAEYTHAIISGKKEDETDIHNLNKKALGISHVTRDMAKTFIYAFLLGAGNGKVAQILGVNMKEAAEAVDNFTHSIEGLAELKTKIVPYIAQRGWFRGLDGRKVKVPNQHKTLAGMLQNGESVIMKHSAIQWVRQAKQEGIDFKLVTWPHDEWQTEVRGEYTVAERLGHLQRQSIVDTGVKLDLFCPMAGSTDIGKSWLDTH	1	yes	PSC-1__MF431616.1___Lentibacter__virus__vB_LenP_ICBM2_gene_12	VOG0026	110.4	9.76e-18	Bacteria	DNA polymerase [n=254]; DNA polymerase I [n=240]; putative DNA polymerase [n=99]; No annotation provided [n=38]; hypothetical protein [n=33]; gp45 [n=22]; putative DNA polymerase I [n=21]; DNA polymerase II [n=14]; gp44 [n=13]; gp60 [n=11]; DNA polymerase A [n=10]; gp62 [n=10]; DNA polymerase 1 [n=7]; gp59 [n=7]; gp43 [n=7]; gp5 [n=7]; putative DNA polymerase A [n=6]; PolA [n=6]; putative T7-like…	VOG00029	146.6	2.31e-24	XhXr	sp|P00581|DPOL_BPT7 DNA-directed DNA polymerase	phrog_15971	188.4	2.27e-32	DNA polymerase I	DNA, RNA and nucleotide metabolism	cluster036800	5.6e-204	680.3	1.7	1	NA	cluster07333	1.1e-206	686.5	2.1	1	NA	Pfam	PF00476	DNA polymerase family A	22	345	2.0E-31	10	1	88
MF431616.1___Lentibacter__virus__vB_LenP_ICBM2	gene_12	5658	6704	1047	1	0	MF431616.1___Lentibacter__virus__vB_LenP_ICBM2_gene_12	prot_733	349	MTVTNNDKTKDDIRGAKFARYGWTLSEANLNTLPEDAPEGGKRLAEWLTLEGRRSSLVEWLGHCREDSRIHGSFTHIGAWTGRMAHSNPNEANIPSAFHGTPKTPVEEVKAKYDGAFRDLWHVPEGSWLVGSDAEGIQLRLLAHFMQSAEYTHAIISGKKEDETDIHNLNKKALGISHVTRDMAKTFIYAFLLGAGNGKVAQILGVNMKEAAEAVDNFTHSIEGLAELKTKIVPYIAQRGWFRGLDGRKVKVPNQHKTLAGMLQNGESVIMKHSAIQWVRQAKQEGIDFKLVTWPHDEWQTEVRGEYTVAERLGHLQRQSIVDTGVKLDLFCPMAGSTDIGKSWLDTH	1	yes	PSC-1__MF431616.1___Lentibacter__virus__vB_LenP_ICBM2_gene_12	VOG0026	110.4	9.76e-18	Bacteria	DNA polymerase [n=254]; DNA polymerase I [n=240]; putative DNA polymerase [n=99]; No annotation provided [n=38]; hypothetical protein [n=33]; gp45 [n=22]; putative DNA polymerase I [n=21]; DNA polymerase II [n=14]; gp44 [n=13]; gp60 [n=11]; DNA polymerase A [n=10]; gp62 [n=10]; DNA polymerase 1 [n=7]; gp59 [n=7]; gp43 [n=7]; gp5 [n=7]; putative DNA polymerase A [n=6]; PolA [n=6]; putative T7-like…	VOG00029	146.6	2.31e-24	XhXr	sp|P00581|DPOL_BPT7 DNA-directed DNA polymerase	phrog_15971	188.4	2.27e-32	DNA polymerase I	DNA, RNA and nucleotide metabolism	cluster036800	5.6e-204	680.3	1.7	1	NA	cluster07333	1.1e-206	686.5	2.1	1	NA	PRINTS	PR00868	DNA-polymerase family A (pol I) signature	181	206	1.5E-5	10	1	88
MF431616.1___Lentibacter__virus__vB_LenP_ICBM2	gene_12	5658	6704	1047	1	0	MF431616.1___Lentibacter__virus__vB_LenP_ICBM2_gene_12	prot_733	349	MTVTNNDKTKDDIRGAKFARYGWTLSEANLNTLPEDAPEGGKRLAEWLTLEGRRSSLVEWLGHCREDSRIHGSFTHIGAWTGRMAHSNPNEANIPSAFHGTPKTPVEEVKAKYDGAFRDLWHVPEGSWLVGSDAEGIQLRLLAHFMQSAEYTHAIISGKKEDETDIHNLNKKALGISHVTRDMAKTFIYAFLLGAGNGKVAQILGVNMKEAAEAVDNFTHSIEGLAELKTKIVPYIAQRGWFRGLDGRKVKVPNQHKTLAGMLQNGESVIMKHSAIQWVRQAKQEGIDFKLVTWPHDEWQTEVRGEYTVAERLGHLQRQSIVDTGVKLDLFCPMAGSTDIGKSWLDTH	1	yes	PSC-1__MF431616.1___Lentibacter__virus__vB_LenP_ICBM2_gene_12	VOG0026	110.4	9.76e-18	Bacteria	DNA polymerase [n=254]; DNA polymerase I [n=240]; putative DNA polymerase [n=99]; No annotation provided [n=38]; hypothetical protein [n=33]; gp45 [n=22]; putative DNA polymerase I [n=21]; DNA polymerase II [n=14]; gp44 [n=13]; gp60 [n=11]; DNA polymerase A [n=10]; gp62 [n=10]; DNA polymerase 1 [n=7]; gp59 [n=7]; gp43 [n=7]; gp5 [n=7]; putative DNA polymerase A [n=6]; PolA [n=6]; putative T7-like…	VOG00029	146.6	2.31e-24	XhXr	sp|P00581|DPOL_BPT7 DNA-directed DNA polymerase	phrog_15971	188.4	2.27e-32	DNA polymerase I	DNA, RNA and nucleotide metabolism	cluster036800	5.6e-204	680.3	1.7	1	NA	cluster07333	1.1e-206	686.5	2.1	1	NA	PRINTS	PR00868	DNA-polymerase family A (pol I) signature	70	92	1.5E-5	10	1	88
MF431616.1___Lentibacter__virus__vB_LenP_ICBM2	gene_12	5658	6704	1047	1	0	MF431616.1___Lentibacter__virus__vB_LenP_ICBM2_gene_12	prot_733	349	MTVTNNDKTKDDIRGAKFARYGWTLSEANLNTLPEDAPEGGKRLAEWLTLEGRRSSLVEWLGHCREDSRIHGSFTHIGAWTGRMAHSNPNEANIPSAFHGTPKTPVEEVKAKYDGAFRDLWHVPEGSWLVGSDAEGIQLRLLAHFMQSAEYTHAIISGKKEDETDIHNLNKKALGISHVTRDMAKTFIYAFLLGAGNGKVAQILGVNMKEAAEAVDNFTHSIEGLAELKTKIVPYIAQRGWFRGLDGRKVKVPNQHKTLAGMLQNGESVIMKHSAIQWVRQAKQEGIDFKLVTWPHDEWQTEVRGEYTVAERLGHLQRQSIVDTGVKLDLFCPMAGSTDIGKSWLDTH	1	yes	PSC-1__MF431616.1___Lentibacter__virus__vB_LenP_ICBM2_gene_12	VOG0026	110.4	9.76e-18	Bacteria	DNA polymerase [n=254]; DNA polymerase I [n=240]; putative DNA polymerase [n=99]; No annotation provided [n=38]; hypothetical protein [n=33]; gp45 [n=22]; putative DNA polymerase I [n=21]; DNA polymerase II [n=14]; gp44 [n=13]; gp60 [n=11]; DNA polymerase A [n=10]; gp62 [n=10]; DNA polymerase 1 [n=7]; gp59 [n=7]; gp43 [n=7]; gp5 [n=7]; putative DNA polymerase A [n=6]; PolA [n=6]; putative T7-like…	VOG00029	146.6	2.31e-24	XhXr	sp|P00581|DPOL_BPT7 DNA-directed DNA polymerase	phrog_15971	188.4	2.27e-32	DNA polymerase I	DNA, RNA and nucleotide metabolism	cluster036800	5.6e-204	680.3	1.7	1	NA	cluster07333	1.1e-206	686.5	2.1	1	NA	PRINTS	PR00868	DNA-polymerase family A (pol I) signature	290	303	1.5E-5	10	1	88
HQ641345.1___Vibrio__phage__ICP2	gene_49	40112	41311	1200	1	0	HQ641345.1___Vibrio__phage__ICP2_gene_49	prot_311	400	MWLDHFDDPTEVFATALSFDCETTIRNHDIGKLQASPFHPANKMVCFGCKTLDAEPVVLRPEHADFPTIIRENGVLLLVGQNIKFDLLWMMRTYPDFRDMLPNLCIWDTQLAEYLLTGQDHKMASLNELAMKYGGTLKDDRIAEFWKAGVDTSDIPFPMLEEYQKYDVINTEIVFLEQVDQIIKEGLLNLTMTQMDALMATTEMEWHGMKFDKDLALELAKPLQAEIEDIKGAVSSVMEAVGFPKDSINVGSNSQISALIFGGEVKYKEKDYIYNDDGTIATFKGGARAGQPKTKIFERSKRIEGLCKPISPKGKNGSYPVGDDSLSKVKAKYKGDAVVEQLVGDILKFRQLEKDVNTYYIGYASQVFPDGCLHGNYNHTKTGTGRLSSSSPNLQNISN	1	yes	PSC-1__HQ641345.1___Vibrio__phage__ICP2_gene_49	VOG0026	104.1	1.64e-16	Bacteria	DNA polymerase [n=254]; DNA polymerase I [n=240]; putative DNA polymerase [n=99]; No annotation provided [n=38]; hypothetical protein [n=33]; gp45 [n=22]; putative DNA polymerase I [n=21]; DNA polymerase II [n=14]; gp44 [n=13]; gp60 [n=11]; DNA polymerase A [n=10]; gp62 [n=10]; DNA polymerase 1 [n=7]; gp59 [n=7]; gp43 [n=7]; gp5 [n=7]; putative DNA polymerase A [n=6]; PolA [n=6]; putative T7-like…	VOG00029	163.6	1.06e-27	XhXr	sp|P00581|DPOL_BPT7 DNA-directed DNA polymerase	phrog_9556	682.1	7.42e-129	DNA polymerase	DNA, RNA and nucleotide metabolism	cluster101497	1.2e-103	351	0	1.1	' DNA polymerase A family protein'=1; 'DNA polymerase I '=2; 'DNA polymerase'=4; 'DNA polymerase family A '=4; ' DNA polymerase I; K02335 DNA polymerase I [EC:2.7.7.7]'=1; 'Putative DNA polymerase '=3; ' hypothetical protein'=1; ' mitochondrial DNA polymerase I protein D'=1; 'No Annotation Found'=2; ' polA; DNA polymerase I (EC:2.7.7.7); K02335 DNA polymerase I [EC:2.7.7.7]'=1;	cluster08342	4.4e-90	303.2	0	1	NA	Pfam	PF00476	DNA polymerase family A	313	398	4.8E-11	59	1	322
HQ641345.1___Vibrio__phage__ICP2	gene_49	40112	41311	1200	1	0	HQ641345.1___Vibrio__phage__ICP2_gene_49	prot_311	400	MWLDHFDDPTEVFATALSFDCETTIRNHDIGKLQASPFHPANKMVCFGCKTLDAEPVVLRPEHADFPTIIRENGVLLLVGQNIKFDLLWMMRTYPDFRDMLPNLCIWDTQLAEYLLTGQDHKMASLNELAMKYGGTLKDDRIAEFWKAGVDTSDIPFPMLEEYQKYDVINTEIVFLEQVDQIIKEGLLNLTMTQMDALMATTEMEWHGMKFDKDLALELAKPLQAEIEDIKGAVSSVMEAVGFPKDSINVGSNSQISALIFGGEVKYKEKDYIYNDDGTIATFKGGARAGQPKTKIFERSKRIEGLCKPISPKGKNGSYPVGDDSLSKVKAKYKGDAVVEQLVGDILKFRQLEKDVNTYYIGYASQVFPDGCLHGNYNHTKTGTGRLSSSSPNLQNISN	1	yes	PSC-1__HQ641345.1___Vibrio__phage__ICP2_gene_49	VOG0026	104.1	1.64e-16	Bacteria	DNA polymerase [n=254]; DNA polymerase I [n=240]; putative DNA polymerase [n=99]; No annotation provided [n=38]; hypothetical protein [n=33]; gp45 [n=22]; putative DNA polymerase I [n=21]; DNA polymerase II [n=14]; gp44 [n=13]; gp60 [n=11]; DNA polymerase A [n=10]; gp62 [n=10]; DNA polymerase 1 [n=7]; gp59 [n=7]; gp43 [n=7]; gp5 [n=7]; putative DNA polymerase A [n=6]; PolA [n=6]; putative T7-like…	VOG00029	163.6	1.06e-27	XhXr	sp|P00581|DPOL_BPT7 DNA-directed DNA polymerase	phrog_9556	682.1	7.42e-129	DNA polymerase	DNA, RNA and nucleotide metabolism	cluster101497	1.2e-103	351	0	1.1	' DNA polymerase A family protein'=1; 'DNA polymerase I '=2; 'DNA polymerase'=4; 'DNA polymerase family A '=4; ' DNA polymerase I; K02335 DNA polymerase I [EC:2.7.7.7]'=1; 'Putative DNA polymerase '=3; ' hypothetical protein'=1; ' mitochondrial DNA polymerase I protein D'=1; 'No Annotation Found'=2; ' polA; DNA polymerase I (EC:2.7.7.7); K02335 DNA polymerase I [EC:2.7.7.7]'=1;	cluster08342	4.4e-90	303.2	0	1	NA	Pfam	PF01612	3'-5' exonuclease	16	147	2.9E-7	59	1	322
HQ641345.1___Vibrio__phage__ICP2	gene_51	41847	42680	834	1	0	HQ641345.1___Vibrio__phage__ICP2_gene_51	prot_313	278	MECDFSQLEVVGGAVLTGDPMMKKDIIEGVDTHCMSASWANPKYSYEEILAGYKAEDPFFTKLRKNAKPVNFALQYGAGAETAAENAGIEVEQAQAIIDNYYKRYCVLKQFQDDVIEQVNKSRQPSSRRTEMGMPAGRGEYRNPTGRIFTFYEYDAPEFLRRRGQMTSFSPTQCKNYPTQSFATGDIVPMMLGHIYKLLMTDKTLRDKCLLIGTVHDSVVFDVHPDILDYAAKAVRGLMLRTPEYVERYLKVPFDMPLACDVDIGEGAWFNMHGYKC	1	yes	PSC-1__HQ641345.1___Vibrio__phage__ICP2_gene_51	VOG0026	145.2	1.53e-24	Bacteria	DNA polymerase [n=254]; DNA polymerase I [n=240]; putative DNA polymerase [n=99]; No annotation provided [n=38]; hypothetical protein [n=33]; gp45 [n=22]; putative DNA polymerase I [n=21]; DNA polymerase II [n=14]; gp44 [n=13]; gp60 [n=11]; DNA polymerase A [n=10]; gp62 [n=10]; DNA polymerase 1 [n=7]; gp59 [n=7]; gp43 [n=7]; gp5 [n=7]; putative DNA polymerase A [n=6]; PolA [n=6]; putative T7-like…	VOG00029	155.2	4.82e-26	XhXr	sp|P00581|DPOL_BPT7 DNA-directed DNA polymerase	phrog_2573	244	3.03e-43	DNA polymerase	DNA, RNA and nucleotide metabolism	cluster033193	6.7e-73	249	0	1	NA	cluster00954	6.9e-49	167.8	0	1	NA	Pfam	PF00476	DNA polymerase family A	2	266	6.4E-27	59	1	324
HQ641345.1___Vibrio__phage__ICP2	gene_51	41847	42680	834	1	0	HQ641345.1___Vibrio__phage__ICP2_gene_51	prot_313	278	MECDFSQLEVVGGAVLTGDPMMKKDIIEGVDTHCMSASWANPKYSYEEILAGYKAEDPFFTKLRKNAKPVNFALQYGAGAETAAENAGIEVEQAQAIIDNYYKRYCVLKQFQDDVIEQVNKSRQPSSRRTEMGMPAGRGEYRNPTGRIFTFYEYDAPEFLRRRGQMTSFSPTQCKNYPTQSFATGDIVPMMLGHIYKLLMTDKTLRDKCLLIGTVHDSVVFDVHPDILDYAAKAVRGLMLRTPEYVERYLKVPFDMPLACDVDIGEGAWFNMHGYKC	1	yes	PSC-1__HQ641345.1___Vibrio__phage__ICP2_gene_51	VOG0026	145.2	1.53e-24	Bacteria	DNA polymerase [n=254]; DNA polymerase I [n=240]; putative DNA polymerase [n=99]; No annotation provided [n=38]; hypothetical protein [n=33]; gp45 [n=22]; putative DNA polymerase I [n=21]; DNA polymerase II [n=14]; gp44 [n=13]; gp60 [n=11]; DNA polymerase A [n=10]; gp62 [n=10]; DNA polymerase 1 [n=7]; gp59 [n=7]; gp43 [n=7]; gp5 [n=7]; putative DNA polymerase A [n=6]; PolA [n=6]; putative T7-like…	VOG00029	155.2	4.82e-26	XhXr	sp|P00581|DPOL_BPT7 DNA-directed DNA polymerase	phrog_2573	244	3.03e-43	DNA polymerase	DNA, RNA and nucleotide metabolism	cluster033193	6.7e-73	249	0	1	NA	cluster00954	6.9e-49	167.8	0	1	NA	ProSitePatterns	PS00447	DNA polymerase family A signature.	64	83	-	59	1	324
KF302037.1___Pseudoalteromonas__phage__HP1	gene_59	44429	45035	607	1	0	KF302037.1___Pseudoalteromonas__phage__HP1_gene_59	prot_580	202	MHVYVFDLEANGLLDVATVVHCGSFKNTQTGEVTSFRPDEIQSMLAFMEKADVLIGHNCIHYDFPLLKKLHDFEYNGQVVDTVWMSRMLYPDIQRPKQMVIDHSVKRTEVAYMVKEGLLPEGFRAHLSGPHSIEAWGYRLGHGKLEYNDWETFDEGMLDRCEGDVLIQEMLFKTLKAEGEKRGFPKESFNVTFELMQILADS	1	yes	PSC-1__KF302037.1___Pseudoalteromonas__phage__HP1_gene_59	VOG1255	69.8	8.32e-10	Bacteria	hypothetical protein [n=45]; DnaQ-like exonuclease [n=28]; No annotation provided [n=19]; gp35 [n=17]; DnaQ-like protein [n=16]; DNA polymerase [n=8]; exonuclease [n=6]; gp114 [n=5]; putative DNA polymerase/exonuclease [n=5]; 3'-5' exonuclease [n=5]; putative DNA polymerase [n=4]; gp112 [n=4]; gp37 [n=4]; putative exonuclease [n=4]; DNA polymerase part I [n=3]; DNA polymerase III subunit [n=3]; g…	VOG00029	66.6	9.66e-09	XhXr	sp|P00581|DPOL_BPT7 DNA-directed DNA polymerase	phrog_403	54.5	3.38e-06	DNA polymerase exonuclease subunit	DNA, RNA and nucleotide metabolism	cluster023631	1.4e-76	261.9	0.1	1	NA	cluster11830	1.8e-83	282.1	0.1	1	' DNA polymerase'=5; 'POLAc domain-containing protein '=1; 'DNA polymerase'=6; 'DNA polymerase family A '=5; 'Putative DNA polymerase '=2; 'T7-like DNA polymerase '=1; 'DNA-directed DNA polymerase; family A; palm domain '=1; 'No Annotation Found'=1; ' DNA-directed DNA polymerase'=1; 'Ribonuclease H-like domain protein '=1;	NA	NA	NA	NA	NA	NA	44	1	415
AY095314.2___Vibriophage__VpV262	gene_53	24828	29438	4611	-1	0	AY095314.2___Vibriophage__VpV262_gene_53	prot_111	1537	MAGELNLDTYQKLLAEDNAPEPSLESYMQMLNAAPPRGPVTDARYTGQAAMIAGNPYEIESLAMAAASGDTKLYRSQQAMSWYDDRVHDAHTQLQQTQFGSAEAMLGAAQLQSERIRMLQDAKSHPLADEVAFATNAAYKGDPEEITRAAVDVALANEIGELAESTGIGEKIAEFGSFLIPFKYAADIADINEQISANPQLAELAGEDLETVVGAWKALPPERQLALVKPLKEAIMKATASFGWTDGNATKTAGLLAQFFEVDPAAQINSEFAEDIVFGAIDVTPIGAIRGLKPVEKLRHAKIIRKVAEDAVADTSAAKVAARAGDKESAAKHTVASLVDDNTAAALGTTRDDAAASALPLETSEWFTRVLDDDELPAAVADEMNNMFAIANGFARTLK…	1	yes	PSC-3__AY095314.2___Vibriophage__VpV262_gene_53	VOG4982	1588.2	1.49e-306	Bacteria	hypothetical protein [n=5]; hypothetical protein ORF035 [n=1]; putative tail sheath [n=1];	VOG04284	1276.1	4.16e-245	Xu	REFSEQ hypothetical protein	phrog_12003	1889.6	0	tail sheath	tail	cluster189012	4.7e-86	293.2	1.1	1.2	'No Annotation Found'=2; 'Uncharacterized protein '=1; 'hypothetical protein'=1;	cluster19028	1.3e-93	315.4	5.6	1.2	'No Annotation Found'=6; 'Putative tail sheath '=2; 'hypothetical protein'=3; 'Uncharacterized protein '=1;	NA	NA	NA	NA	NA	NA	58	3	202
HQ641345.1___Vibrio__phage__ICP2	gene_6	3411	7661	4251	-1	0	HQ641345.1___Vibrio__phage__ICP2_gene_6	prot_268	1417	MAIGEEFVYSNPLEMGQEQQFEPISSKKEVAIRESTSKFRTGDNDLMKTYMEAYNADPIVRLANSQQEAKEAALTGTAMAIDELAGDNPQVLANSAAQLTKIANDASVDYDRELGAELAYVDSLNTNLTPEEREDAATQLWVRRQIGEVWDEGLWGTMTSMDALTAMFLPGYHSAQSADFLQAVSPEAGNWFTEFMTSGGGLADLGKRFMGLPPKERIRAFKELRKAAQEATDNEFQQMVLLMSATGVETESNTQLASILDKVDTATLGLTGIKAVSALKRLSSTARNVAHVPDVAATVVDVASRSEDAASAVSMSRLDAATTAAPIQDMGVILEGAAPEIAHEVQKRWSTVDAIFAETKNVAREGVPLTPQEQQAFAEKIAARIAERHEVSNLTFETT…	1	yes	PSC-3__HQ641345.1___Vibrio__phage__ICP2_gene_6	VOG4982	1785.2	0	Bacteria	hypothetical protein [n=5]; hypothetical protein ORF035 [n=1]; putative tail sheath [n=1];	VOG04284	1416	1.87e-272	Xu	REFSEQ hypothetical protein	phrog_12003	1927.8	0	tail sheath	tail	cluster179869	3.9e-223	747.5	26.2	2	'No Annotation Found'=2; 'Uncharacterized protein '=1; 'hypothetical protein'=1;	cluster19028	6.3e-187	624.5	23.3	1	'No Annotation Found'=6; 'Putative tail sheath '=2; 'hypothetical protein'=3; 'Uncharacterized protein '=1;	NA	NA	NA	NA	NA	NA	58	3	93
JQ446452.1___Salinivibrio__phage__CW02	gene_43	23129	27370	4242	-1	0	JQ446452.1___Salinivibrio__phage__CW02_gene_43	prot_376	1414	MQDGFTYADDNPYLDKPTNEDNQKALRRIDEGARRVATGEPLDSLEEDSLNNSVEQQDVAITETAEANRAEAFNGLIEELALQDRRDVLPKAISARAEDYSDSVERAKSALGPFYARVYETPGAENLTEQQLIDIAVDDYVLDSMAKAVDDQGGWEMAGDILNMALIPDESYNATQISEANLLTSLDGIRSVAERRSALSPDERIKFDQALYNSIGEFESSEIQRYTTMLDVMGNSPETAVAHYVDKFAVGEIALVGLKLMKGLRGLNKMRKLSKVGDNETAAVMSQMAARDKQMAEGLGVPQADAAMAGNPLKAGMEEDVLNGTTTTASTETRLYTQEEIEKNLEKVDSVFGANTDLSQEERLQIAKAYAEEMETKDNVVSATVEYAGPDFVEIRALD…	1	yes	PSC-3__JQ446452.1___Salinivibrio__phage__CW02_gene_43	VOG4982	1513.9	5.02e-292	Bacteria	hypothetical protein [n=5]; hypothetical protein ORF035 [n=1]; putative tail sheath [n=1];	VOG04284	1209	5.24e-232	Xu	REFSEQ hypothetical protein	phrog_12003	1612.7	1e-296	tail sheath	tail	cluster039187	2.1e-300	1003.4	26.9	1	NA	cluster19028	1.8e-250	835.1	30.3	1	'No Annotation Found'=6; 'Putative tail sheath '=2; 'hypothetical protein'=3; 'Uncharacterized protein '=1;	NA	NA	NA	NA	NA	NA	58	3	93
AF189021.1___Roseophage__SIO1	gene_48	28362	32816	4455	-1	0	AF189021.1___Roseophage__SIO1_gene_48	prot_048	1485	MDSIASFEELEGGLEEETTQSKSKPIDPNSPLEIETVEAQAYLLDEDPQVISETRANQDFTHEGLAKQYPDLTRYLDTLYEAGVSVEEAGRLAREHVERKAIAVAPQEFIFSSMLMVDDETVNPESLRVLTNYEKISSRISKRLEENDPSTFKWLTAGALNTARDFTVGVLEMAIRRDSSLSQKYADSLFMEEDEFNDFWDKEIADAEAKGLFNIREYESLKELQALVDNFGTDTDAGFNQLLALADIATLGGTKTVGRLASAGVKKAATGTRSVVSDLLASKTVSEAVTATKGIAEGGKATVKQLNSARPSPAVAYKAGPSTMDPKPSVNTPSAAVVTEGTKRSMLFEKMAEMLSSPFAGKTFTTKSLAEATTEVADRLVAQSTNAFVKVSRRRAEGS…	1	yes	PSC-3__AF189021.1___Roseophage__SIO1_gene_48	VOG4982	98.3	2.3e-15	Bacteria	hypothetical protein [n=5]; hypothetical protein ORF035 [n=1]; putative tail sheath [n=1];	VOG10470	2895.1	0	Xu	REFSEQ internal virion protein D	phrog_38076	3481.2	0	no_hit	unknown function	cluster010114	0	2461.8	24.8	1	NA	cluster08098	0	2521.7	26.6	1	NA	NA	NA	NA	NA	NA	NA	21	3	17
EnvX___Montereybay__phage__JGI26117J46588_1000006	gene_35	18205	22653	4449	-1	0	EnvX___Montereybay__phage__JGI26117J46588_1000006_gene_35	prot_236	1483	MANILTLEDSIFNSQTLSQQLEEENETEVFNPLSEVETIKAQELAIAIDGDENEIREARANGDTNHTSVVKTEGGEFDYNLSIDQAYNDGLKPEDIAEVIQNRKDKGEDMGLPEYMLMQNLMLSDNDINPYGARTLTNMETWNRLIQREIEDNDQSGLSKALTFLDVNILREITIGAFENVTFRSNREGVDIREAFTSLKPSEFEEWAKEYVKERKSEGIFSTDSIWNLHKSANDALYVGNDPMAGANAVFGVADIATLGYLKGATTLATALKAGKNSTTANKLLSLTKVRRPVDAVAVIKGEVPAANVLSKSVDDMGIQVDEIAAGRNLPEELDPVQGPSARPSGVTLRQNNRKTVLMEKIEEMNRRGSFGEYVSASTIAKAADDIAVNIANRTNDVV…	1	yes	PSC-3__EnvX___Montereybay__phage__JGI26117J46588_1000006_gene_35	VOG4982	84.3	1.25e-12	Bacteria	hypothetical protein [n=5]; hypothetical protein ORF035 [n=1]; putative tail sheath [n=1];	VOG10470	1518.5	1.77e-292	Xu	REFSEQ internal virion protein D	phrog_38076	485.3	2.14e-90	no_hit	unknown function	cluster000806	0	2642.7	13.6	1	NA	cluster05266	0	2721	14.3	1	NA	NA	NA	NA	NA	NA	NA	21	3	17
JQ809650.1___Celeribacter__phage__P12053L	gene_42	21003	25466	4464	-1	0	JQ809650.1___Celeribacter__phage__P12053L_gene_42	prot_450	1488	MNSIASFEELEGGLEEETPQSKTKPIDPYSPLEIEKVEEQAFLLDEDPQVISETRAKQDFTHEGLAKQYPQLERYLDTLYEAGVSVEEAGRLAGEYVTRKEISVSPQEFIFSSMLLVDDETVNPESLRVLTNYEKIGKRISERLEANDPSTFKWLAAGTLNTARDFTIGVLEMLVRKDESLSKKYADSLFMEDEEFNAFWDKEIADAEAKGLFNIREYESLKELQGLVDNFGTDTDAGFNQLLSLVDIATLGGTKAVGRLASSGVKKAAQGTRSVVADLLKSKTVSEAVTATRGVVEGGKATVKQLNGSNPSPAVSYKAGPTSLDPTPSVNTPSAAVVVEGTKRSTLFEKMAEMMSSPFAGKTFSNKSLAEATTEVADRLIAQSTNAFVKVSRRRAEGS…	1	yes	PSC-3__JQ809650.1___Celeribacter__phage__P12053L_gene_42	VOG4982	89.4	1.26e-13	Bacteria	hypothetical protein [n=5]; hypothetical protein ORF035 [n=1]; putative tail sheath [n=1];	VOG10470	2888.1	0	Xu	REFSEQ internal virion protein D	phrog_38076	3492.1	0	no_hit	unknown function	cluster010114	0	2424.6	20.4	1	NA	cluster08098	0	2489.8	22.3	1	NA	NA	NA	NA	NA	NA	NA	21	3	17
MF431615.1___Lentibacter__virus__vB_LenP_ICBM3	gene_21	15867	20330	4464	1	0	MF431615.1___Lentibacter__virus__vB_LenP_ICBM3_gene_21	prot_683	1488	MNSIASFEELEGGLEEETPQSKTKPIDPYSPLEIEKVEEQAFLLDEDPQVISETRAKQDFTHEGLAKQYPQLERYLDTLYEAGVSVEEAGRLAGEYVARKEISVSPQEFIFSSMLLVDDETVNPESLRVLTNYEKIGKRISERLEANDPSTFKWLAAGTLNTARDFTIGVLEMLVRKDESLSKKYADSLFMEDEEFNTFWDKEIADAEAKGLFNIREYESLKELQGLVDNFGTDTDAGFNQLLALVDIATLGGTKAAGRLASSGVKKAAEGTRSVVADLLKSKTVSEAVTATRGVVEGGKATVKQLNGSNPSPAVSYKAGPTSLDPTPSVNTPSAAVVVEGTKRSTLFEKMAEMMSSPFAGKTFSNKSLAEATTEVADRLIAQSTNAFVKVSRRRAEGS…	1	yes	PSC-3__MF431615.1___Lentibacter__virus__vB_LenP_ICBM3_gene_21	VOG4982	87.3	3.22e-13	Bacteria	hypothetical protein [n=5]; hypothetical protein ORF035 [n=1]; putative tail sheath [n=1];	VOG10470	2876.4	0	Xu	REFSEQ internal virion protein D	phrog_38076	3467.7	0	no_hit	unknown function	cluster010114	0	2423.1	19.7	1	NA	cluster08098	0	2493.1	21.8	1	NA	NA	NA	NA	NA	NA	NA	21	3	17
MF431616.1___Lentibacter__virus__vB_LenP_ICBM2	gene_36	19396	23850	4455	-1	0	MF431616.1___Lentibacter__virus__vB_LenP_ICBM2_gene_36	prot_757	1485	LVTPITLDDAIANEEQLQLDSEGMDETLVFNPNSEVEKNKAQELAIATGEPVDQIEAEREVGDNRSEVLAKTQALNFDYALAIDKAYEDGLQPEEIAEVIKQRKAKGDDMTLGEYMLIQNLMLSDNDVDSYAARTMTNMEIWDNLVQSEFESNDQTGFSKFLTFLDVNLLRYFTLGAFEDTSFRSNREGEDIRSAFNRLKPEDFKVWAKDYVEERKSEGIFSEDSIWNLYKIANDSTYLGDDPMAAINAIFGFTDIATLGGTSLVKGGARGAVGVVKGTARAPKKLYGLYKARKPVDVVAVIGDEVAAAEVATKMVDDAGVQTDIVVAGRTLPEELDAVKGPVSRPSGVTTRNGTRKNVLAEKLEDLNRKGSFGEYVPPAVILEVATQTATKIAQNVGD…	1	yes	PSC-3__MF431616.1___Lentibacter__virus__vB_LenP_ICBM2_gene_36	VOG4982	84.3	1.25e-12	Bacteria	hypothetical protein [n=5]; hypothetical protein ORF035 [n=1]; putative tail sheath [n=1];	VOG10470	2394.3	0	Xu	REFSEQ internal virion protein D	phrog_38076	504.8	3.37e-94	no_hit	unknown function	cluster000806	0	2545.3	12.6	1	NA	cluster05266	0	2506.1	13.5	1	NA	NA	NA	NA	NA	NA	NA	21	3	17
MF431617.1___Lentibacter__virus__vB_LenP_ICBM1	gene_38	20180	24643	4464	-1	0	MF431617.1___Lentibacter__virus__vB_LenP_ICBM1_gene_38	prot_814	1488	MNSIASFEELEGGLEEETPQSKTKPIDPYSPLEIEKVEEQAFLLDEDPQVISETRAKQDFTHEGLAKQYPQLERYLDTLYEAGVSVEEAGRLAGEYVARKEISVSPQEFIFSSMLLVDDETVNPESLRVLTNYEKIGKRISERLEANDPSTFKWLAAGTLNTARDFTIGVLEMLVRKDESLSKKYADSLFMEDEEFNTFWDKEIADAEAKGLFNIREYESLKELQGLVDNFGTDTDAGFNQLLALVDIATLGGTKAAGRLASSGVKKAAEGTRSVVADLLKSKTVSEAVTATRGVVEGGKATVKQLNGSNPSPAVSYKAGPTSLDPTPSVNTPSAAVVVEGTKRSTLFEKMAEMMSSPFAGKTFSNKSLAEATTEVADRLIAQSTNAFVKVSRRRAEGS…	1	yes	PSC-3__MF431617.1___Lentibacter__virus__vB_LenP_ICBM1_gene_38	VOG4982	87.3	3.22e-13	Bacteria	hypothetical protein [n=5]; hypothetical protein ORF035 [n=1]; putative tail sheath [n=1];	VOG10470	2876.4	0	Xu	REFSEQ internal virion protein D	phrog_38076	3467.7	0	no_hit	unknown function	cluster010114	0	2423.1	19.7	1	NA	cluster08098	0	2493.1	21.8	1	NA	NA	NA	NA	NA	NA	NA	21	3	17
DQ163915.1___Bacteriophage__PA11	gene_36	23969	28633	4665	-1	0	DQ163915.1___Bacteriophage__PA11_gene_36	prot_167	1555	MASLQEFNSTATPELGEFQVGVNQTAPVSNQASNLNLAAHSAALVQDPQQVMDAYNTSLSEMSLEGKSQAAQAIFDTAKQQSFNQQKQALVNLLVDPNVSDEEKKKAALGVLDWQDSRYNIRNTLSTNAIIAPSGKENSEMEFTRVNLADSVQAVNEYKREAQAILNGQVAAVDAETMTAFADVFQYFIPFVESKFAGTILDDLKNGGGHAYIQATAMLGSAKMDIKDMVNSIPPEQRIGFAQAVVNAVNANKNIVMVDENDFAKVDYLRSFLEEGYYDDTFKWVDNVVSILNIVGLGAYAGRVARGVTRAARISEDTARNIRRESVVNRVQPTTISQNYKDTNPAKAQAVHEAAASDLTGEASQALYGASREEAIVHDLAPQIGSVDNSVKAKVGNAG…	1	yes	PSC-3__DQ163915.1___Bacteriophage__PA11_gene_36	VOG4982	1658.6	2.66993e-307	Bacteria	hypothetical protein [n=5]; hypothetical protein ORF035 [n=1]; putative tail sheath [n=1];	VOG04284	1558.5	2.67e-300	Xu	REFSEQ hypothetical protein	phrog_18427	2961.7	0	no_hit	unknown function	cluster013237	0	1806.1	27.9	1	NA	cluster15974	0	1775.6	26.9	1	'No Annotation Found'=4; 'Uncharacterized protein '=2; 'hypothetical protein'=2;	NA	NA	NA	NA	NA	NA	92	3	82
KP774835.2___Citrobacter__phage__CVT22	gene_14	12719	17440	4722	1	0	KP774835.2___Citrobacter__phage__CVT22_gene_14	prot_594	1574	MAELNDFVETQEYSIEDFTDPSAVQPPVTSLGSDRSAAAHAAMLSPEPANAIQAYDQIVGERASTGTSDTEEALVTNARGENMLAYQRSTAELLMDPSASQEWKAAAIGVVNDPNSTLYDPRTMVATKAATQKVDSETQEAALQRGIAAAGINEVLEFQREKQKHYNSMQLVSDKDKTADWVSTAEGFIPLASGYKEARITRDLAGNDWSTFRTAMATIFNGKTVKERNEMFNSLPINQRMQMMDKIADIISTDGQTIFLPSSRDTVNLKAFMQTVESDGYSTTEETVDNILGVLDFAGVGSMVRTGANYVTKLGKLAGEADTVSDSFRNVVRTNVTTDVQPTSLHNTVKDVNPQMGRNLYNATLTDESGELATAVYGTSREDAIASVVAPKPATVDGT…	1	yes	PSC-3__KP774835.2___Citrobacter__phage__CVT22_gene_14	VOG4982	1583.1	1.53e-305	Bacteria	hypothetical protein [n=5]; hypothetical protein ORF035 [n=1]; putative tail sheath [n=1];	VOG04284	1559.2	1.94e-300	Xu	REFSEQ hypothetical protein	phrog_18427	2836.5	0	no_hit	unknown function	cluster013237	0	1403.5	23.3	1	NA	cluster15974	0	1345	23.4	1	'No Annotation Found'=4; 'Uncharacterized protein '=2; 'hypothetical protein'=2;	NA	NA	NA	NA	NA	NA	92	3	82
KC751414.1___Pseudoalteromonas__phage__RIO_1	gene_38	23547	28370	4824	-1	0	KC751414.1___Pseudoalteromonas__phage__RIO_1_gene_38	prot_502	1608	MADTDFYNDAVQDTSFFDGVSARPPVSSVQAGERATLTAVQQEGVDGLSGDLVQRVKQELEVYGLSTDEQQARSSTRTGLKGPITEAALTSMPLETTEDAENLKGVVQDELGSIEQRDEIADMIVNTMESLPEESRKHGTFFNDLVNKTLADRASGSIIDLQIQDEFDSASGIDLTLDFVEAVFGGQIIGTRKFQTEVLEKVGVHGISAGDYVFKADDVDALYNYVQDASTAEEQIERVEEIVQIISDTQSPFGENVLYRTDFLTNLRAELEREGGGTQLAAMDDVLDATEVGFIAKSLTGFLKASGAKLFGSAAAANKTLSSEDADYIRSVMQEATEALSPSNGVAHKPTVVPVENKGSLLDTLAVNKPETLRTALNAAEASGEDLTQYLGVTKSGIA…	1	yes	PSC-3__KC751414.1___Pseudoalteromonas__phage__RIO_1_gene_38	VOG4982	120.3	1.15e-19	Bacteria	hypothetical protein [n=5]; hypothetical protein ORF035 [n=1]; putative tail sheath [n=1];	VOG04284	1475.6	4.15e-284	Xu	REFSEQ hypothetical protein	phrog_12003	1620.5	3.02e-298	tail sheath	tail	cluster141041	0	3593.1	26.2	1	'No Annotation Found'=4; 'Uncharacterized protein '=2; 'hypothetical protein'=2;	cluster35698	2.7e-26	92.2	12.9	2.5	'No Annotation Found'=5; 'Uncharacterized protein '=2; 'hypothetical protein'=1;	NA	NA	NA	NA	NA	NA	84	3	115
KF302037.1___Pseudoalteromonas__phage__HP1	gene_13	8564	13387	4824	-1	0	KF302037.1___Pseudoalteromonas__phage__HP1_gene_13	prot_534	1608	MADTDFYNDAVQDTSFFDGVSARPPVSSVQAGERATLTAVQQEGVEGLSGDLVQRVKQELEVYGLSTDEQQARSTTRSELKGPITEAALTSMPLETTEDAENLKGVVQDELGSIEQRDEIADMIVNTMESLPEESRKHGAFFNDLVNKTLADRASGSIIDLQIQDEFDSASGIDLTLDFVEAVFGGQIVGTRMFQTEVLEKVGVHGISAGDYIFKADDVDALYNYVQDASTSEEQIERVEEIVQIISDTQSPFGENVLYRTDFLTNLRAELEREGGGTQLAAVDDVLDATEVGFLAKTLTGFLKASGAKLFGSAAAANKTLSSEDADYIRSVMQEAADSLSPSNGIAHKPQMVTVENKGSLLDTLAVNKPETLRTALNAADANGEDVMQYLGVTKSGVA…	1	yes	PSC-3__KF302037.1___Pseudoalteromonas__phage__HP1_gene_13	VOG4982	125.9	9.04e-21	Bacteria	hypothetical protein [n=5]; hypothetical protein ORF035 [n=1]; putative tail sheath [n=1];	VOG04284	1420.6	2.38e-273	Xu	REFSEQ hypothetical protein	phrog_12003	1556.6	9.15e-300	tail sheath	tail	cluster141041	0	3686.4	28.6	1	'No Annotation Found'=4; 'Uncharacterized protein '=2; 'hypothetical protein'=2;	cluster35698	2.6e-27	95.6	14.2	2.3	'No Annotation Found'=5; 'Uncharacterized protein '=2; 'hypothetical protein'=1;	NA	NA	NA	NA	NA	NA	84	3	115
AF189021.1___Roseophage__SIO1	gene_51	33703	35850	2148	-1	0	AF189021.1___Roseophage__SIO1_gene_51	prot_051	716	MPQSLTQRTVNTFIKGLITEASELTFPENASVDELNCSLGRDGTRRRRKAVTLEDNHVLSDVVVPEGALVQTLDWYNVAGQVNLEFLVVQVNNILYFYEKSTDPLSANKYSGSVDLNTHSASNNLSPSEERVQVTSLNGYLIVASPAINTFYLGFNTSTEAFTATSISFKERDFEWQGSDVDVTSLYFGEGTSVSNQRIYDTYNVGWVGPKGSAALNTYGSYIVYPALTHPWYSGKDANGAFNKADWLEIYTGSSLASNGHYVLDVFNKARTGLTTEVETGRFRSVAAYAGRVFYAGIDSAKNGGKVYFSRLTERMSDVGNCYQVNDPTSEVLSDLLDTDGGVVRIPDAHNIRKLHVLGASLLVFAENGVWAVAGVDNVFRATEYAITRISDVGLSNEN…	1	yes	PSC-8__AF189021.1___Roseophage__SIO1_gene_51	VOG2355	989.1	1.84e-189	Bacteria	hypothetical protein [n=6]; putative head closure protein [n=2]; gp27 [n=1]; hypothetical protein ORF038 [n=1]; T7-like tubular tail B family-like protein [n=1]; putative tail appendage [n=1];	VOG09926	928.4	3.7e-177	Xu	REFSEQ hypothetical protein	phrog_8094	936.7	1.31e-178	tail appendage	tail	cluster009358	0	1369.9	21.6	1	NA	cluster06748	0	1429.1	21.6	1	NA	NA	NA	NA	NA	NA	NA	4	8	4
AY095314.2___Vibriophage__VpV262	gene_60	32977	35712	2736	-1	0	AY095314.2___Vibriophage__VpV262_gene_60	prot_118	912	MAARKGAVNRFTPVRGWVTEGNLANYGQDVALDVENMDIEKTGLTQRRFGLFAETSSEQFLSTFTATARARGLLAVKEWREAWGDKDVNMLIFHAGYKVHVVQDTAPLRDANILLTIDLLEAGIKLDGVIDSPVHISVGVGFAIITNPRIEPVLIKLDDVDDEGVPTLSYEPLTLLIRTRELLTPYTTGTNYGDTLTPEEEWNLYNSGWATITRATKDKSGSGTVYVNPVQYYFDKRGVYPSHSVLYNSMKQESAKEIVALNVFSPWADEKINFGTTTPPLGRYIHSAYYFDSAAILSLGIGNLTPPTSDGTTEGSGPAEEEISNPIGLDNIGTVNNLKLIAEGTVRWTVKDRPRCSGYHNGHVYFGDRDKNGKTRILVSQLVNSLDNIPKCFQDADPT…	1	yes	PSC-8__AY095314.2___Vibriophage__VpV262_gene_60	VOG2355	869.4	4.59e-166	Bacteria	hypothetical protein [n=6]; putative head closure protein [n=2]; gp27 [n=1]; hypothetical protein ORF038 [n=1]; T7-like tubular tail B family-like protein [n=1]; putative tail appendage [n=1];	VOG09926	1325.5	8.92e-255	Xu	REFSEQ hypothetical protein	phrog_8094	1384.1	4.72e-266	tail appendage	tail	cluster010882	9.5e-84	285.4	1.5	1.1	NA	cluster05034	1.2e-77	262.5	4.4	2.1	NA	NA	NA	NA	NA	NA	NA	4	8	4
DQ163915.1___Bacteriophage__PA11	gene_39	29472	31787	2316	-1	0	DQ163915.1___Bacteriophage__PA11_gene_39	prot_170	772	MAKTTNAAEFNTFVGGLITEASPLTFPQNASIDEVNFILNRDGSRNRRNGMDFENGATKVVCNTLVPADGTIAVTSHNWENAGGEVGRWISLVQVGTELKFFQTTGETLSEGNFYNYQFVNMSPSHKLSYAVVDGLLVVANGSRDIYVFEYDSGSVSVTTKRLLVRDLFGVQDIVNGVDLRQGNDIATRPTVQTNAHIYNLRNQTFGVPRVTWHSNEPSDPIVTFRSAASGKFPSNSDSVNLALSKRADVEPSTTDRFRAEDIVLNPIGTYETARGFFIIDAMARGKSRLEEIVKLKQRYPSLSFGVSSLPQDETPGGASVVCEYAGRVWYAGFSGQIIDGDDQSPRLVSYILFSQLVDSPADIVNCYQDGDPTSTEEPELVDTDGGFIRIEGAHDIIN…	1	yes	PSC-8__DQ163915.1___Bacteriophage__PA11_gene_39	VOG2355	1093.5	7.16e-210	Bacteria	hypothetical protein [n=6]; putative head closure protein [n=2]; gp27 [n=1]; hypothetical protein ORF038 [n=1]; T7-like tubular tail B family-like protein [n=1]; putative tail appendage [n=1];	VOG09926	960.4	2.06e-183	Xu	REFSEQ hypothetical protein	phrog_8094	1074.9	1.27e-205	tail appendage	tail	cluster012180	0	1033.5	2.4	1	NA	cluster02865	9.3e-277	921.3	3.3	1	NA	NA	NA	NA	NA	NA	NA	4	8	4
EnvX___Montereybay__phage__JGI26117J46588_1000006	gene_38	23636	25750	2115	-1	0	EnvX___Montereybay__phage__JGI26117J46588_1000006_gene_38	prot_239	705	MAQSLTQKTVNNFVKGLITEAAELTFPEGASVNELNCDLRRXGSRRRRQGVALXSXNVLSSFTISDSERVNTGNWVNVGGNAALEFLVVQKGNTLYFYNKAELPYSAQIQGGTVNLSSYEFSGSSGANNSNCQFASINGNLVVSSAGINTIVVSYNGSSISVSSISFKVRDFDWQGDTDTYSTEDNSPSAARTYDAKNTGWGQSGGPSDFTKPLTHPWYAGKDQDGNYDEAEWDKVFAGTTLTGNGHFILDFFSKVRSGLATETESSRFKSVASFSGRVFYAGLTSAKHAGTILFSRLVEDTEDLGNCHQQNDPTAEYLSDLLDTDGGVLNIPDAVNIQLLYPFRSSLFIFAENGVWQITGVDGIFSATAYGVNRVSNIGLLNPQTFIQAEGLPFWWSR…	1	yes	PSC-8__EnvX___Montereybay__phage__JGI26117J46588_1000006_gene_38	VOG2355	592.6	5.69e-112	Bacteria	hypothetical protein [n=6]; putative head closure protein [n=2]; gp27 [n=1]; hypothetical protein ORF038 [n=1]; T7-like tubular tail B family-like protein [n=1]; putative tail appendage [n=1];	VOG09926	718.2	4.51e-136	Xu	REFSEQ hypothetical protein	phrog_8094	545.7	3.37e-102	tail appendage	tail	cluster006356	0	1340.8	17.4	1	NA	cluster01039	0	1258.3	13.6	1	NA	NA	NA	NA	NA	NA	NA	4	8	4
HQ641345.1___Vibrio__phage__ICP2	gene_9	8575	10779	2205	-1	0	HQ641345.1___Vibrio__phage__ICP2_gene_9	prot_271	735	MARQQANLEYNQFQSGLITEGNILNLPIDSFREGENFILSKANAWERRKGLGLEDSGTLYPSYVDFSDQTLVSSVHVWQTHYSAIPEILVVQFGDKLHFFDTSVDPLSNGKLFINNQEFLTTEGTTEDIISGASVEGIFVFATQDADPISLQIMDIQSDSITARTKIVVDRKVLFLETRDVWGRSAPSKERPKTLSSDYLYELINQGWDTKKINSTYATIGAYPSGYDIWWLYKTTAGTDANAIGKFTPSRMKDSTTTGIGQERQNTPAPRGSTVASLQVLASGKPSCIQTFAGRVFYAGFQATPRKIDDVRPDFRNHVFFSQLVKSNAEINKCYQFADPTSEVDSALVDTDGGFIKINAARKIVAMEEVSSGLFIIAENGVWLLSGTSDGLFSATGYH…	1	yes	PSC-8__HQ641345.1___Vibrio__phage__ICP2_gene_9	VOG2355	899.3	6.38e-172	Bacteria	hypothetical protein [n=6]; putative head closure protein [n=2]; gp27 [n=1]; hypothetical protein ORF038 [n=1]; T7-like tubular tail B family-like protein [n=1]; putative tail appendage [n=1];	VOG09926	794.9	4.58e-151	Xu	REFSEQ hypothetical protein	phrog_8094	923.6	4.67e-176	tail appendage	tail	cluster012180	1.6e-143	483.4	4.6	2	NA	cluster02865	2.1e-150	503.5	6.4	1.8	NA	NA	NA	NA	NA	NA	NA	4	8	4
JQ446452.1___Salinivibrio__phage__CW02	gene_46	28118	30343	2226	-1	0	JQ446452.1___Salinivibrio__phage__CW02_gene_46	prot_379	742	VTKQYQAVETNSFIKGFVTEANALTFPPNASIDEQNFLLNKDGSRKRRLGMVQEEGGTLIPSLNESINSYTITTYEWEAPGGFEALSFLAMQDGPDLLIFDKTQAQVSNSLLKTYSNLLPTENSVSFANVNGILVVATGTRFLTSIEYTGSEFKDDTFEIKIRDLFGVDDGAMSGSGLAERPGSLSQEHLYNLKNQTWAVPRKAGNSESLKDPVKQFRDKAGVYPSNADSVNSALYADVNDGDDRISKRFFAKDLEANPVGSMEAPRGRFIISVLERSSSRDEEMDKLYSDYTPQEYEFTGAPLDRTTGGSTVVAEFSGRCWYSGFIGESQGGDRRSPRLSSYVFYSRLIDSPAQLGECHSSQDPTTPDQFELADTDGGFLRIDGANNILHMEPLGSSL…	1	yes	PSC-8__JQ446452.1___Salinivibrio__phage__CW02_gene_46	VOG2355	1045.3	1.94e-200	Bacteria	hypothetical protein [n=6]; putative head closure protein [n=2]; gp27 [n=1]; hypothetical protein ORF038 [n=1]; T7-like tubular tail B family-like protein [n=1]; putative tail appendage [n=1];	VOG09926	925.8	1.2e-176	Xu	REFSEQ hypothetical protein	phrog_8094	1020.1	6.56e-195	tail appendage	tail	cluster012180	1.5e-255	853.8	0.5	1	NA	cluster02865	1.5e-240	801.6	0.3	1	NA	NA	NA	NA	NA	NA	NA	4	8	4
JQ809650.1___Celeribacter__phage__P12053L	gene_45	26390	28513	2124	-1	0	JQ809650.1___Celeribacter__phage__P12053L_gene_45	prot_453	708	MPQSLIQRTVNTFIKGLITEASELTFPENASVDELNCSLERDGTRRRRKAVTLEENNVLSDVVVPEGALVQTLDWPNVAGQLNLEFLVVQVNNNIYFYEKSTDPLSANKYAGSVDLNTYSASNNLSPSNERIQVTALNGYLIVASPAINTFYLEFDVNTEAFTAEVISFKERDFEWQGTDLEVTSEYFSDDSSPSAQRTYDAKNVGWGQGGGPATYTYPLTHAWYTGKDANGSFNITDWREIYTGSSLAANGHFVLNVFNKVRSGLTTEVETGRFRSVAAYAGRVFYAGIDSAKNGGKVYFSRLTERMADVGNCYQVNDPTSEVLSDLLDTDGGVVRIPDAHNIRKLHVLGASLLVFAENGVWAVAGVDNVFRATEYAITRISDVGLSNENSFIVADGI…	1	yes	PSC-8__JQ809650.1___Celeribacter__phage__P12053L_gene_45	VOG2355	984.7	1.32e-188	Bacteria	hypothetical protein [n=6]; putative head closure protein [n=2]; gp27 [n=1]; hypothetical protein ORF038 [n=1]; T7-like tubular tail B family-like protein [n=1]; putative tail appendage [n=1];	VOG09926	916.8	6.92e-175	Xu	REFSEQ hypothetical protein	phrog_8094	926.6	1.2e-176	tail appendage	tail	cluster009358	0	1361.5	17.2	1	NA	cluster06748	0	1457.1	17.7	1	NA	NA	NA	NA	NA	NA	NA	4	8	4
KP774835.2___Citrobacter__phage__CVT22	gene_11	9585	11885	2301	1	0	KP774835.2___Citrobacter__phage__CVT22_gene_11	prot_591	767	MAVQSAAQEVNSFSKGIITEASPLSFPDNASINENNLVIENDGSRRRRFGMDYEPQFVTRNTNQLITADLAFASFSWKAPGGYSDIELLVVQVGSQLFMFNSTMRPVSGSLVYSADLGIASNTTVSFAASDGLLVVASTTATIRVYDWDGTTVVPSTGRLLIRDLFGVSDVVSGNNLLEGSGVAFRPATTTSAHTYNLRNQTFAVPRFNETDEILYDPIYYFQLKHGVYQSNSDNLVVYLYADPNQTSDRNTRRYFAQDNFANPLGTFRAPVGYFIIDALDRGASRMSEIGKLHAQYPQLVATVTSLPTDRTPDGASVVTSFAGRVWFSGFSSKIIGGDSESPRMGSYVLFSKLVKSPSDVYKCYQDGDPTSAEAPDLLDTDGGFIRLDGANNIQKLIN…	1	yes	PSC-8__KP774835.2___Citrobacter__phage__CVT22_gene_11	VOG2355	1066.6	1.3e-204	Bacteria	hypothetical protein [n=6]; putative head closure protein [n=2]; gp27 [n=1]; hypothetical protein ORF038 [n=1]; T7-like tubular tail B family-like protein [n=1]; putative tail appendage [n=1];	VOG09926	943.1	5.01e-180	Xu	REFSEQ hypothetical protein	phrog_8094	1048.7	1.69e-200	tail appendage	tail	cluster012180	8.6e-285	950.5	3.4	1	NA	cluster02865	7.5e-258	858.8	4.3	1	NA	NA	NA	NA	NA	NA	NA	4	8	4
MF431615.1___Lentibacter__virus__vB_LenP_ICBM3	gene_18	12795	14918	2124	1	0	MF431615.1___Lentibacter__virus__vB_LenP_ICBM3_gene_18	prot_680	708	MPQSLIQRTVNTFIKGLITEASELTFPENASVDELNCSLERDGTRRRRKAVTLEENNVLSDVVVPEGALVQTLDWPNVAGQLNLEFLVVQVNNNIYFYEKSTDPLSANKYAGSVDLNTYSASNNLSPSDERIQVTALNGYLIVASPAINTFYLEFNVNSEAFTGNVISFKERDFEWQGTDLEVTSEYFSNDGSPSPQRIYDAKNVGWGQGGGPATYTYALTHAWYTGKDATGAFSSTDWEEIYTGSSLAANGHFVLNVFNKVRSGLTTEVETGRFRSVAAYAGRVFYAGIDSAKNGGKVYFSRLTERMADVGNCYQVNDPTSEILSDLLDTDGGVVRIPDAHNIRKLHVLGASLLVFAENGVWAVAGVDNVFRATEYAITRISDVGLSNENSFIVADGI…	1	yes	PSC-8__MF431615.1___Lentibacter__virus__vB_LenP_ICBM3_gene_18	VOG2355	970.7	7.27e-186	Bacteria	hypothetical protein [n=6]; putative head closure protein [n=2]; gp27 [n=1]; hypothetical protein ORF038 [n=1]; T7-like tubular tail B family-like protein [n=1]; putative tail appendage [n=1];	VOG09926	910.8	1.02e-173	Xu	REFSEQ hypothetical protein	phrog_8094	920.5	1.94e-175	tail appendage	tail	cluster009358	0	1355.2	16.6	1	NA	cluster06748	0	1451.7	17.2	1	NA	NA	NA	NA	NA	NA	NA	4	8	4
MF431616.1___Lentibacter__virus__vB_LenP_ICBM2	gene_39	24827	26962	2136	-1	0	MF431616.1___Lentibacter__virus__vB_LenP_ICBM2_gene_39	prot_760	712	MAQSLNQKAVNNFVKGLITEAAELTFPEGASVDELNCDLRRDGTRRRRLGVTTEESFTLSSFTLSDSELTSVGEWANVGGNADLTFLVLQKGSTLYFYNKADLPYSDQIEANSVDLSAYEFSGSSGAETAKCQFTTLEGKLVVSSSAIDTLSIAYDAGSYTVSVIDFQTRDFEWQGEVDEYYTDDSTPSILRQYDARNTGWGASGAPTTLTKRLTHPWYAGKDADNNYSSTEFNKVFGGTSLTGNGHFVLDFFSKNRSAVSGVAGITTETEESRFKCVESFSGRVFYAGLESAKNAGTILFSKLTNNVDDFGKCYQVNDPTAEYLSDLLDTDGGEIHISDAINIQRLYAYQASLFIFAENGVWQITGVDGVFKASSYSVNRVSRIGILSPESFVAAEGV…	1	yes	PSC-8__MF431616.1___Lentibacter__virus__vB_LenP_ICBM2_gene_39	VOG2355	582.4	5.5e-110	Bacteria	hypothetical protein [n=6]; putative head closure protein [n=2]; gp27 [n=1]; hypothetical protein ORF038 [n=1]; T7-like tubular tail B family-like protein [n=1]; putative tail appendage [n=1];	VOG09926	861.4	4.49e-164	Xu	REFSEQ hypothetical protein	phrog_8094	540.1	4.28e-101	tail appendage	tail	cluster005873	0	1284.1	18.3	1	NA	cluster01039	0	1248.6	17.9	1	NA	NA	NA	NA	NA	NA	NA	4	8	4
MF431617.1___Lentibacter__virus__vB_LenP_ICBM1	gene_41	25592	27715	2124	-1	0	MF431617.1___Lentibacter__virus__vB_LenP_ICBM1_gene_41	prot_817	708	MPQSLIQRTVNTFIKGLITEASELTFPENASVDELNCSLERDGTRRRRKAVTLEENNVLSDVVVPEGALVQTLDWPNVAGQLNLEFLVVQVNNNIYFYEKSTDPLSANKYAGSVDLNTYSASNNLSPSDERIQVTALNGYLIVASPAINTFYLEFNVNSEAFTGNVISFKERDFEWQGTDLEVTSEYFSNDGSPSPQRIYDAKNVGWGQGGGPATYTYALTHAWYTGKDATGAFSSTDWEEIYTGSSLAANGHFVLNVFNKVRSGLTTEVETGRFRSVAAYAGRVFYAGIDSAKNGGKVYFSRLTERMADVGNCYQVNDPTSEILSDLLDTDGGVVRIPDAHNIRKLHVLGASLLVFAENGVWAVAGVDNVFRATEYAITRISDVGLSNENSFIVADGI…	1	yes	PSC-8__MF431617.1___Lentibacter__virus__vB_LenP_ICBM1_gene_41	VOG2355	970.7	7.27e-186	Bacteria	hypothetical protein [n=6]; putative head closure protein [n=2]; gp27 [n=1]; hypothetical protein ORF038 [n=1]; T7-like tubular tail B family-like protein [n=1]; putative tail appendage [n=1];	VOG09926	910.8	1.02e-173	Xu	REFSEQ hypothetical protein	phrog_8094	920.5	1.94e-175	tail appendage	tail	cluster009358	0	1355.2	16.6	1	NA	cluster06748	0	1451.7	17.2	1	NA	NA	NA	NA	NA	NA	NA	4	8	4
AY095314.2___Vibriophage__VpV262	gene_58	31595	31891	297	-1	0	AY095314.2___Vibriophage__VpV262_gene_58	prot_116	99	MIPSDNHSSLMTASFDWSIDSRTRKVTTQQEAYKYDSRRLAQGGAESAYPYEVVDTKLRIRGQGRAVRIRFQSNGGKDLRLLGYSILGVDFGDSEGNS	1	yes	PSC-8__AY095314.2___Vibriophage__VpV262_gene_58	VOG2355	63.3	1.59e-08	Bacteria	hypothetical protein [n=6]; putative head closure protein [n=2]; gp27 [n=1]; hypothetical protein ORF038 [n=1]; T7-like tubular tail B family-like protein [n=1]; putative tail appendage [n=1];	VOG09926	66.7	9.25e-09	Xu	REFSEQ hypothetical protein	phrog_8094	58	6.96e-07	tail appendage	tail	cluster217506	2.2e-22	82.5	0	1	'No Annotation Found'=3; 'Uncharacterized protein '=1;	cluster08153	3.2e-15	56.4	0.1	1	NA	NA	NA	NA	NA	NA	NA	4	8	206
KC751414.1___Pseudoalteromonas__phage__RIO_1	gene_41	29108	30289	1182	-1	0	KC751414.1___Pseudoalteromonas__phage__RIO_1_gene_41	prot_505	394	MIDIQARKYPTCICSAFGRLFYGAEGRVYFSQVFIDDIGVLGKCYQNNDPTSSEISDVLATDGGEILIQNTGAVYDIIPFNTGVLVLTSRGIWFVGQQGISFSAVDYAVQKISDEGVVGYNSSTESVGSVYYVADSGIHRIAVNENGQIKSDNLTEFSINSVIQDFLVQGTTLMYNRKDRTLHVFDAGTNTEFVFEERTQGWYKNQYSSGTHQSSVYDKDSGQVFLYYSTDDTEVTYGFSTKTSDSFEDYGVTYESFIQSQPETLGKFSHDKRVTSMKVMFQKTEEEITGYDDEAAEYTYDSPSSCLFTAKWDFDGTGTGLRWTAQRDIYKPLQRKLIPEYYPFPFDTGETIISTKLGVRGYGKAIQFRFDAEPNKDMQILGYTVEYRMRGKQ	1	yes	PSC-8__KC751414.1___Pseudoalteromonas__phage__RIO_1_gene_41	VOG2355	493.9	1.12e-92	Bacteria	hypothetical protein [n=6]; putative head closure protein [n=2]; gp27 [n=1]; hypothetical protein ORF038 [n=1]; T7-like tubular tail B family-like protein [n=1]; putative tail appendage [n=1];	VOG09926	448.3	2.42e-83	Xu	REFSEQ hypothetical protein	phrog_8094	203.2	2.93e-35	tail appendage	tail	cluster016268	8e-159	532.7	11.5	1	NA	cluster06118	2.5e-173	577.8	12	1	NA	NA	NA	NA	NA	NA	NA	80	8	117
KF302037.1___Pseudoalteromonas__phage__HP1	gene_16	14120	15301	1182	-1	0	KF302037.1___Pseudoalteromonas__phage__HP1_gene_16	prot_537	394	LIDIQARKYPTCICSAFGRLFYGAEGRVYFSQVFIDDIGVLGKCYQNNDPTSSEISDVLDTDGGEILIQNTGAVYDIIPFNTGVLVLASRGIWFVGQQGISFSATDYAVQKISDEGVVGYNSSTESVGSVYYVADSGIHRIAVNENGQIKSDNLTEFSINSVIQDFLVQGTTLMYNRKDRTLHVFDAGTNTEFVFEERTQGWYKNQYSSGTHQSSVYDRDTGQVFLYYSTDNTEVTYGFSTKSSDVFEDYGVTYESFIQSQPETLGKFSHDKRVTSMKVMFQKTEEQITGYDDEAAEYTYDSPSSCLFTAKWDFDGTGTGLRWTAQRDIYKPLQRKLIPEYYPYPFDTGETIISTKLGIRGYGKAIQFRFDAEPNKDMQILGYTVEYRMRGKQ	1	yes	PSC-8__KF302037.1___Pseudoalteromonas__phage__HP1_gene_16	VOG2355	492.2	2.4e-92	Bacteria	hypothetical protein [n=6]; putative head closure protein [n=2]; gp27 [n=1]; hypothetical protein ORF038 [n=1]; T7-like tubular tail B family-like protein [n=1]; putative tail appendage [n=1];	VOG09926	444.7	1.26e-82	Xu	REFSEQ hypothetical protein	phrog_8094	207.9	3.54e-36	tail appendage	tail	cluster016268	9.1e-163	545.6	11.4	1	NA	cluster06118	1.1e-177	592.2	11.9	1	NA	NA	NA	NA	NA	NA	NA	80	8	117
KC751414.1___Pseudoalteromonas__phage__RIO_1	gene_45	32277	33239	963	-1	0	KC751414.1___Pseudoalteromonas__phage__RIO_1_gene_45	prot_509	321	MPIARGEKDYLGFVQGLNTEANPLAAPEGTTSDELNMELNLENGTRARRLGLARIHSADLKFTPSGVTAPDFQVQGVFFWEATKKYITVFRYTDEEDKKVSSIVVHNQNYDIEFEFVVDTPDDVPPNFVDIRSRLVITLGTSPVILQPVGDSYDVYVLTLYIRDFTLLNDSLSIGERPSTLSDEHKYNLYNAGWYKDRILGSGSKGDPVTYFNTEIGAYPSNADIVALGDSVDSGSGKEEFDPESLDNIDLGSTEAARGHYVYNIRNIDRNSKLTSKNNDGAVGNSATKIIEQGASTGDGGGTGGSDWNDPVLPPGFIIP	1	yes	PSC-8__KC751414.1___Pseudoalteromonas__phage__RIO_1_gene_45	VOG2355	101.3	5.81e-16	Bacteria	hypothetical protein [n=6]; putative head closure protein [n=2]; gp27 [n=1]; hypothetical protein ORF038 [n=1]; T7-like tubular tail B family-like protein [n=1]; putative tail appendage [n=1];	VOG09926	100.3	2.56e-15	Xu	REFSEQ hypothetical protein	phrog_8094	105	4.5e-16	tail appendage	tail	cluster013295	1e-99	337.3	0	1	NA	cluster04927	2.2e-108	363.3	0.1	1	NA	NA	NA	NA	NA	NA	NA	94	8	119
KF302037.1___Pseudoalteromonas__phage__HP1	gene_18	15854	16816	963	-1	0	KF302037.1___Pseudoalteromonas__phage__HP1_gene_18	prot_539	321	MPIARGEKDYLGFVQGLNTEANPLAAPEGTTSDELNMELNLENGTRARRLGLARIHSADLKFTPSGVTAPDFQVQGVFFWEAIKKYITVFRYTDEEDKKVSSIVVHNQSYDVEFEFVVDTPDDVPPNFVDIRSRLVITLGTSPVILQPVGDTYDVYVLTLYIRDFTLLNDSLSIGERPSTLSDEHKYNLYNAGWYKDRMLGSGSKGDPVTYFNTEIGSYPSNADVVALGDSVDSGSGKEEFDPEALDNIDLGSTESARGHYVYNIRNIDRNSKLTSKNNDGAVGNSATKIIEQGTSTGDGGGTGGSDWNDPVLPPGFIIP	1	yes	PSC-8__KF302037.1___Pseudoalteromonas__phage__HP1_gene_18	VOG2355	95.3	8.83e-15	Bacteria	hypothetical protein [n=6]; putative head closure protein [n=2]; gp27 [n=1]; hypothetical protein ORF038 [n=1]; T7-like tubular tail B family-like protein [n=1]; putative tail appendage [n=1];	VOG09926	95.2	2.56e-14	Xu	REFSEQ hypothetical protein	phrog_8094	97.8	1.13e-14	tail appendage	tail	cluster013295	2.2e-101	342.8	0	1	NA	cluster04927	7.1e-112	374.8	0.2	1	NA	NA	NA	NA	NA	NA	NA	94	8	119
AF189021.1___Roseophage__SIO1	gene_10	7972	8463	492	-1	0	AF189021.1___Roseophage__SIO1_gene_10	prot_010	164	MAKKPSKMWFYETTLPDTRNEFTNYSLKKKDHKVGDKTYLSLHKIYIEMEDPTEYEFALSVFGDYSVWENLCNLSWFKTHHVQMQKELMLKLKARTIRNMINDLEEGKASYNAQKYLADAGYLDNGSKKRGRPSKDELDGALKQAALEKAETEDDATRIGLMN	1	yes	PSC-11__AF189021.1___Roseophage__SIO1_gene_10	VOG2361	221.6	1.82e-39	Bacteria	hypothetical protein [n=10]; hypothetical protein ORF050 [n=1];	VOG09929	251.3	7.82e-45	Xu	REFSEQ hypothetical protein	phrog_8035	245.9	1.31e-43	no_hit	unknown function	cluster067429	2.3e-92	310.8	3.9	1	NA	cluster04451	2.4e-40	139.1	1.2	1	NA	NA	NA	NA	NA	NA	NA	7	11	11
DQ163915.1___Bacteriophage__PA11	gene_51	40053	40556	504	-1	0	DQ163915.1___Bacteriophage__PA11_gene_51	prot_182	168	MIDKSRLVDSMGRPLTQSLFLEIGYSEFAVYTFKDRDYAYKGSHYPSLKRLYLEEEDPIEYTFAEKHLLGWQHWKRLQENKIIRKQIDQWREELELKLRSQGVREMLNLCASETGNFSAAKYLADRGWEKRAAGRPSKAEKERYQAIEEKLQDEFSADIARLDDFRK	1	yes	PSC-11__DQ163915.1___Bacteriophage__PA11_gene_51	VOG2361	305.3	7.81e-56	Bacteria	hypothetical protein [n=10]; hypothetical protein ORF050 [n=1];	VOG09929	329.6	3.86e-60	Xu	REFSEQ hypothetical protein	phrog_8035	326.7	2.11e-59	no_hit	unknown function	cluster013463	5.8e-70	237.9	3.1	1	NA	cluster03625	4e-67	225.8	2.2	1	NA	NA	NA	NA	NA	NA	NA	7	11	21
EnvX___Montereybay__phage__JGI26117J46588_1000006	gene_60	39840	40364	525	-1	0	EnvX___Montereybay__phage__JGI26117J46588_1000006_gene_60	prot_261	175	MFQYDNFKGSNGKTKTKSLFYELCYSDTEDAIFTLKDRDLEAHGKMYLSLQKLYLQLAPSDPTEYEFAQTVFGSWDIWKTVSSAANIKVHVARWRSEVEVKVKSEAIKAIAEEMKTKGRSSFSAAKLLLDKGWLDKENASQAKQKLKAREDEDQNKQALSHLTEDAERLGIKVN	1	yes	PSC-11__EnvX___Montereybay__phage__JGI26117J46588_1000006_gene_60	VOG2361	124.5	1.68e-20	Bacteria	hypothetical protein [n=10]; hypothetical protein ORF050 [n=1];	VOG09929	209.1	1.38e-36	Xu	REFSEQ hypothetical protein	phrog_8035	136.8	2.78e-22	no_hit	unknown function	cluster013510	1.1e-92	312.2	5.7	1	NA	cluster03701	6.4e-87	290.8	5.5	1	NA	NA	NA	NA	NA	NA	NA	7	11	11
HQ641345.1___Vibrio__phage__ICP2	gene_21	20258	20761	504	-1	0	HQ641345.1___Vibrio__phage__ICP2_gene_21	prot_283	168	MRKEFKDSMGRWITQGLFLEKGYKPSSIYTIQDEDRMYKGEKYLSIKRLFIEKYIEDPTEMKFARECLGGWQHWKKIKANQELYAMYEEWKEEAEIQVRSIGVRSAMEMARDGKSFAAAKWLAEAGYDKRGAGRPSKEEIVRETRIASRVKDELEEDYERLLGGMSE	1	yes	PSC-11__HQ641345.1___Vibrio__phage__ICP2_gene_21	VOG2361	276.5	3.32e-50	Bacteria	hypothetical protein [n=10]; hypothetical protein ORF050 [n=1];	VOG09929	280.4	1.59e-50	Xu	REFSEQ hypothetical protein	phrog_8035	281.3	1.62e-50	no_hit	unknown function	cluster013463	1.2e-53	184.8	2.8	1	NA	cluster03625	2.4e-59	200.5	3.8	1	NA	NA	NA	NA	NA	NA	NA	7	11	21
JQ446452.1___Salinivibrio__phage__CW02	gene_56	37638	38135	498	-1	0	JQ446452.1___Salinivibrio__phage__CW02_gene_56	prot_389	166	LDKNKLKDTQGRPLTQSLFLEIGYSNYAVYTIDQDEDYTYKGKVYPSLKRLFLECEDPTEYEFANKHLLGWSHWQRLCRNKILNKRFEEWREELEVKLRSQGIKQAIANAKNGGFQASKWLSEGGWDKAKPGRPSKEDKERHERIQSRVDDELQQDVAYLFKDDV	1	yes	PSC-11__JQ446452.1___Salinivibrio__phage__CW02_gene_56	VOG2361	312.4	3.25e-57	Bacteria	hypothetical protein [n=10]; hypothetical protein ORF050 [n=1];	VOG09929	330.4	2.7e-60	Xu	REFSEQ hypothetical protein	phrog_8035	328.8	8.32e-60	no_hit	unknown function	cluster013463	6.2e-66	224.8	3.1	1	NA	cluster03625	6.7e-67	225.1	2.5	1	NA	NA	NA	NA	NA	NA	NA	7	11	21
JQ809650.1___Celeribacter__phage__P12053L	gene_56	38042	38533	492	-1	0	JQ809650.1___Celeribacter__phage__P12053L_gene_56	prot_464	164	MAKKPSKMWFYETTLPDTRNEFTNYSLKKKDHKVGDKTYLSLHKIYIDMEDPTEYEFALSVFGDFSVWENLCNLSWFKVHHQQMKKELMLKLKARTIRGMINDLEEGKASYNAQKYLADAGYLEGNDKKRGRPSKEELDGVLKEAARNEADTKDDATRIGLIN	1	yes	PSC-11__JQ809650.1___Celeribacter__phage__P12053L_gene_56	VOG2361	245.7	3.56e-44	Bacteria	hypothetical protein [n=10]; hypothetical protein ORF050 [n=1];	VOG09929	267.5	5.29e-48	Xu	REFSEQ hypothetical protein	phrog_8035	263.3	5.12e-47	no_hit	unknown function	cluster067429	8.1e-93	312.2	3.1	1	NA	cluster04451	2.3e-40	139.2	0.9	1	NA	NA	NA	NA	NA	NA	NA	7	11	11
KP774835.2___Citrobacter__phage__CVT22	gene_2	2234	2731	498	1	0	KP774835.2___Citrobacter__phage__CVT22_gene_2	prot_582	166	MIDKSKMKASNGVPLTQGLFLEIGYTDFAVFTTKDEDYDYNGKTYPSLKRLYLEMEDLGEYEFATTYLLGWNHWQRMCANKQILKYIEEWRYELELKLRSRAIKTMKDKIGTEQGINAAKWIAEKGWDKKAVGRPNKQEEEREKRMLDSLDVDWAGDLAMLTGSK	1	yes	PSC-11__KP774835.2___Citrobacter__phage__CVT22_gene_2	VOG2361	302	3.46e-55	Bacteria	hypothetical protein [n=10]; hypothetical protein ORF050 [n=1];	VOG09929	323.1	7.31e-59	Xu	REFSEQ hypothetical protein	phrog_8035	313.3	8.71e-57	no_hit	unknown function	cluster013463	1.3e-65	223.8	3.5	1	NA	cluster03625	1.1e-60	204.9	4.4	1	NA	NA	NA	NA	NA	NA	NA	7	11	21
MF431615.1___Lentibacter__virus__vB_LenP_ICBM3	gene_2	425	916	492	1	0	MF431615.1___Lentibacter__virus__vB_LenP_ICBM3_gene_2	prot_664	164	MAKKPSKMWFYETTLPDTRNEFTNYSLKKKDHKVGDKTYLSLHKIYIDMEDPTEYEFALSVFGDFSVWENLCNLSWFKVHHQQMKKELMLKLKARTIRGMINDLEEGKASYNAQKYLADAGYLEGNDKKRGRPSKEELDGALKEAARNEADTKDDATRIGLIN	1	yes	PSC-11__MF431615.1___Lentibacter__virus__vB_LenP_ICBM3_gene_2	VOG2361	243.8	8.1e-44	Bacteria	hypothetical protein [n=10]; hypothetical protein ORF050 [n=1];	VOG09929	266.1	1.02e-47	Xu	REFSEQ hypothetical protein	phrog_8035	261.6	1.15e-46	no_hit	unknown function	cluster067429	2.4e-93	313.9	3.2	1	NA	cluster04451	2.3e-40	139.2	1	1	NA	NA	NA	NA	NA	NA	NA	7	11	11
MF431616.1___Lentibacter__virus__vB_LenP_ICBM2	gene_55	39714	40241	528	-1	0	MF431616.1___Lentibacter__virus__vB_LenP_ICBM2_gene_55	prot_776	176	MMYTPEQLKGSNNKIRTKQLFYELSYMDPENALFTTKEQDIEVRGKTYISLKQLYLSMVPNDPTEYTFALTVFGSWHIWETISKSALVKPYIKEWRSEVEVKIKSEAIQAIAEEMRSQGRSSFTAAKLLLDKGWLDKEPATAAKKKLMDKENEEQDRAALSMLSEDAERLGLKVN	1	yes	PSC-11__MF431616.1___Lentibacter__virus__vB_LenP_ICBM2_gene_55	VOG2361	117.7	3.7e-19	Bacteria	hypothetical protein [n=10]; hypothetical protein ORF050 [n=1];	VOG09929	288.7	3.91e-52	Xu	REFSEQ hypothetical protein	phrog_8035	131.9	2.46e-21	no_hit	unknown function	cluster013510	5.8e-84	283.8	1.6	1	NA	cluster03701	3.6e-81	272.1	2.3	1	NA	NA	NA	NA	NA	NA	NA	7	11	11
MF431617.1___Lentibacter__virus__vB_LenP_ICBM1	gene_57	39249	39740	492	-1	0	MF431617.1___Lentibacter__virus__vB_LenP_ICBM1_gene_57	prot_833	164	MAKKPSKMWFYETTLPDTRNEFTNYSLKKKDHKVGDKTYLSLHKIYIDMEDPTEYEFALSVFGDFSVWENLCNLSWFKVHHQQMKKELMLKLKARTIRGMINDLEEGKASYNAQKYLADAGYLEGNDKKRGRPSKEELDGALKEAARNEADTKDDATRIGLIN	1	yes	PSC-11__MF431617.1___Lentibacter__virus__vB_LenP_ICBM1_gene_57	VOG2361	243.8	8.1e-44	Bacteria	hypothetical protein [n=10]; hypothetical protein ORF050 [n=1];	VOG09929	266.1	1.02e-47	Xu	REFSEQ hypothetical protein	phrog_8035	261.6	1.15e-46	no_hit	unknown function	cluster067429	2.4e-93	313.9	3.2	1	NA	cluster04451	2.3e-40	139.2	1	1	NA	NA	NA	NA	NA	NA	NA	7	11	11
AY095314.2___Vibriophage__VpV262	gene_69	42945	43502	558	-1	0	AY095314.2___Vibriophage__VpV262_gene_69	prot_127	186	MLLTPELKKERWEAAYAGEIHVPKDMNRATAALFWEKRHEARTIERGKYPVFNLSMRDHDDTLSFPQLYFQCDSDYEAAMVILGSWGHWQRLCEAKWFAEKLALWQEEKAQRDIAHGRAKIKALADAGNLSACKFLASGGLSDKPKQEKPSNPKPAKNPEPAPTAEEDDFLKHGLSILEKNSEHK	1	yes	PSC-11__AY095314.2___Vibriophage__VpV262_gene_69	VOG2361	225.6	2.95e-40	Bacteria	hypothetical protein [n=10]; hypothetical protein ORF050 [n=1];	VOG09929	249.4	1.87e-44	Xu	REFSEQ hypothetical protein	phrog_8035	328	1.17e-59	no_hit	unknown function	cluster053950	1.7e-18	70.7	0	1.3	NA	cluster08752	1.2e-16	62.1	0.2	1.4	NA	NA	NA	NA	NA	NA	NA	60	11	21
KC751414.1___Pseudoalteromonas__phage__RIO_1	gene_55	40499	41020	522	-1	0	KC751414.1___Pseudoalteromonas__phage__RIO_1_gene_55	prot_519	174	MQHINYEEWDCKQQRVTLKVGKGLDATQALFYEFPSPHKETATYTLKNQDVEYKGTQRISAYLVYMHSVDEYDAAIKLVGSMKHWRKLCSLSWFMEGVPEYSFEGLEQWREDMRLRDESLAKRQLMEAAHGGNVNAQKLLFGTPTKKVKEEKPVKKDTSAIDSIVQSISRARN	1	yes	PSC-11__KC751414.1___Pseudoalteromonas__phage__RIO_1_gene_55	VOG2361	315.1	9.72e-58	Bacteria	hypothetical protein [n=10]; hypothetical protein ORF050 [n=1];	VOG09929	239	1.99e-42	Xu	REFSEQ hypothetical protein	phrog_8035	304.1	5.67e-55	no_hit	unknown function	cluster170400	1.8e-123	412.8	0.5	1	'No Annotation Found'=2; 'Uncharacterized protein '=1; 'hypothetical protein'=1;	cluster08752	1.4e-72	243.9	0.3	1	NA	NA	NA	NA	NA	NA	NA	60	11	85
KF302037.1___Pseudoalteromonas__phage__HP1	gene_28	24068	24589	522	-1	0	KF302037.1___Pseudoalteromonas__phage__HP1_gene_28	prot_549	174	MQHINYEEWDCKQQRVTLKVGKGLDATQALFYEFPSPHKETATYTLKNQDVEYKGTQRISAYLVYMHSVDEYDAAIKLVGSMKHWRKLCSLSWFMEGVPEYSFEGLEQWREDMRLRDESLAKRQLMEAAHGGNVNAQKLLFGTPTKKPKEEKPVKKDTSAIDSIVQSISRARN	1	yes	PSC-11__KF302037.1___Pseudoalteromonas__phage__HP1_gene_28	VOG2361	315.3	8.91e-58	Bacteria	hypothetical protein [n=10]; hypothetical protein ORF050 [n=1];	VOG09929	237.3	4.35e-42	Xu	REFSEQ hypothetical protein	phrog_8035	304.8	4.15e-55	no_hit	unknown function	cluster170400	6.1e-124	414.3	0.3	1	'No Annotation Found'=2; 'Uncharacterized protein '=1; 'hypothetical protein'=1;	cluster08752	8.6e-73	244.6	0.2	1	NA	NA	NA	NA	NA	NA	NA	60	11	85
AF189021.1___Roseophage__SIO1	gene_53	36123	36872	750	-1	0	AF189021.1___Roseophage__SIO1_gene_53	prot_053	250	MKMTLLEMVQNILSDMDSEEINSLVDSNEAEQIAKVVENTYFAMIATRFIPEHSQTLKLTSFSSSARPTHFSFPTRVKNIEFLDYNVSKAVGGVEYRRLKYLSPDEFFGLSDGRDSLASNVKQVADVGSDSILLIRNDAMPMYYTSFDDDTVVLDSYDASVDAILTSAKTRAYGVKYPTFDSFSDTFVPDIDDTMFPFLLAEAKSTAMSLFKSGADPKIEQTARRQKVYVQNDMHKVNTGRAKNNYGRN	1	yes	PSC-15__AF189021.1___Roseophage__SIO1_gene_53	VOG2357	391.5	1.12e-72	Bacteria	hypothetical protein [n=8]; putative adaptor protein [n=2]; gp28 [n=1]; hypothetical protein ORF040 [n=1];	VOG09927	398.3	1.48e-73	Xu	REFSEQ hypothetical protein	phrog_7592	390	8.97e-72	tail protein	tail	cluster031069	4.7e-145	485.4	6.5	1	NA	cluster08602	5.1e-152	505.6	6.5	1	NA	NA	NA	NA	NA	NA	NA	5	15	5
AY095314.2___Vibriophage__VpV262	gene_57	30843	31595	753	-1	0	AY095314.2___Vibriophage__VpV262_gene_57	prot_115	251	MPKRTLLQIVKKMAQKTGSDEVTSLSEDSIEIQDMVDCALEVLEDIIYRNDWEFLKDRPAQLEAGTNAIELSIPDNVRKIQTLRYRYEDAGVQNCFRTLRYMYPHEFMERLQNNKPTDPDTTTVTINGVELYPKTNRHPRYWTSFDEQNVVLDSYDATQNPTGVDATDSAIIATLYLDFTGSDADSWVAPIPESLFTLWEQEAVAEAFVQFRQTENPRAERRSRRTYVQQIKKEPVTHKDEGSDEVNYGR	1	yes	PSC-15__AY095314.2___Vibriophage__VpV262_gene_57	VOG2357	380.2	1.82e-70	Bacteria	hypothetical protein [n=8]; putative adaptor protein [n=2]; gp28 [n=1]; hypothetical protein ORF040 [n=1];	VOG09927	363.5	9.27e-67	Xu	REFSEQ hypothetical protein	phrog_7592	374.6	9.22e-69	tail protein	tail	cluster171468	6.4e-53	183.1	0.9	1	'No Annotation Found'=2; 'Head completion adaptor '=1; 'hypothetical protein'=1;	cluster03612	1.8e-37	129.8	0.7	1	NA	NA	NA	NA	NA	NA	NA	5	15	5
DQ163915.1___Bacteriophage__PA11	gene_41	31969	32772	804	-1	0	DQ163915.1___Bacteriophage__PA11_gene_41	prot_172	268	MIKTLLDIVQDILSEMSSDEVNSINDTIESMQVAQIVKSVYMSMMSNRNWPHQRKLIQLEPSGDDAYPTHMKLQTPIKEMCFINYDCVKDGETRKRYRTMKWAEPDDFLRSISKRNNDQDNIDVIIDPSGVELLIRNDLAPTYYTSFDDTTLIFDSYDKAVDDTLQKSKIQAMAYVMPVFFMDDDFIPEIPDEARAALLEEAKSRAFITIKQMANQKAEQEAQRQQAWLSRKAWRVNGGIKYPNYGRNSMKYQSSPYFDKHNKKPTP	1	yes	PSC-15__DQ163915.1___Bacteriophage__PA11_gene_41	VOG2357	575.6	1.18e-108	Bacteria	hypothetical protein [n=8]; putative adaptor protein [n=2]; gp28 [n=1]; hypothetical protein ORF040 [n=1];	VOG09927	556.6	1.65e-104	Xu	REFSEQ hypothetical protein	phrog_7592	571.2	3.45e-107	tail protein	tail	cluster004721	3e-125	420.3	7	1	NA	cluster03612	2.3e-122	408.1	5.8	1	NA	NA	NA	NA	NA	NA	NA	5	15	5
EnvX___Montereybay__phage__JGI26117J46588_1000006	gene_40	26027	26758	732	-1	0	EnvX___Montereybay__phage__JGI26117J46588_1000006_gene_40	prot_241	244	MKRTLLEMVQSILSDMDSEDVNAISDTIEAQQVASVIEDAYYNIVSARDIPEHRQLLKLTSLSDSTRPTHFKYPANVKQIESIHYNTSAAGSSYKAIYYIEPLEFILKMDEHSPNSLKIADKQGNTDLFVLNDIQPTYYTSFDDEHIVMNSYDSTIDSVLAADKTRAYGSVYPTFSITDSFEPDLDDNMLPYLLAEAKSTCFSLFKSGSDPKVEQSARRLKAYVQNDMHNTKKANKRPVYGRT	1	yes	PSC-15__EnvX___Montereybay__phage__JGI26117J46588_1000006_gene_40	VOG2357	279.2	1.02e-50	Bacteria	hypothetical protein [n=8]; putative adaptor protein [n=2]; gp28 [n=1]; hypothetical protein ORF040 [n=1];	VOG09927	339.3	4.92e-62	Xu	REFSEQ hypothetical protein	phrog_7592	279.8	3.08e-50	tail protein	tail	cluster050401	5.6e-150	501.6	8	1	NA	cluster00501	7.8e-131	436.2	8	1	NA	NA	NA	NA	NA	NA	NA	5	15	5
HQ641345.1___Vibrio__phage__ICP2	gene_11	10971	11765	795	-1	0	HQ641345.1___Vibrio__phage__ICP2_gene_11	prot_273	265	MKYTVIDIVQDMLSDSDGDNVNSIDDTTESLQAAYILRSSYDNLITNSTIDYFRRGVQFDGVSDVDKPNYLKLPDNIQEMTYLAYDTSMKERPVSYTELKYLYPDEFLARQATLNSGQANVQKVRDYNGIVYFIQNDKAPQFWTSFDDEYLVLDSYNKDVESTIHKDKTQGIAYISPKFVMEDDWIIDLPADMFPYLISEAKAAFSAKIRQMDSAKDEQWATIHRRRMSRKSWQAKGGIRLPNYGRPTSSTSPNRRSPYFDKSY	1	yes	PSC-15__HQ641345.1___Vibrio__phage__ICP2_gene_11	VOG2357	493.8	1.14e-92	Bacteria	hypothetical protein [n=8]; putative adaptor protein [n=2]; gp28 [n=1]; hypothetical protein ORF040 [n=1];	VOG09927	480.8	1.12e-89	Xu	REFSEQ hypothetical protein	phrog_7592	504.8	3.39e-94	tail protein	tail	cluster004721	9e-87	294.2	5.3	1	NA	cluster03612	1.2e-84	284.4	4	1	NA	NA	NA	NA	NA	NA	NA	5	15	5
JQ446452.1___Salinivibrio__phage__CW02	gene_48	30512	31267	756	-1	0	JQ446452.1___Salinivibrio__phage__CW02_gene_48	prot_381	252	LKPTLLEIVQEVLNDMDSDEVNSINDTFESAQVASICKTVFRNMTSNRNWPHMKRAVNLVPFSDNNYPTHMRVDKSFTEIVFINYNTAKAGETRKYYKSMTWLEPDDFLRRVNKWDTDSDSVDVILDMSGVEVAVRNDRAPEYYTSFDDDVIVFDSYDKEVDDTLQSSKTQCVAYVLPEFYVIDDHKPDLPEEAMAAYISEVKSQAFIKLKQQASQKDEQESVKQQRWLSRKSWVVNGGIKYPNYGRRGRK	1	yes	PSC-15__JQ446452.1___Salinivibrio__phage__CW02_gene_48	VOG2357	502.7	2.1e-94	Bacteria	hypothetical protein [n=8]; putative adaptor protein [n=2]; gp28 [n=1]; hypothetical protein ORF040 [n=1];	VOG09927	488.9	2.92e-91	Xu	REFSEQ hypothetical protein	phrog_7592	501.1	1.72e-93	tail protein	tail	cluster004721	2.7e-112	377.9	7.8	1	NA	cluster03612	1.8e-107	359.2	5.7	1	NA	NA	NA	NA	NA	NA	NA	5	15	5
JQ809650.1___Celeribacter__phage__P12053L	gene_47	28786	29535	750	-1	0	JQ809650.1___Celeribacter__phage__P12053L_gene_47	prot_455	250	MKMTLLEMVQNILSDMDSEEINSISDSNEAEQIAQVVKNTYFNMIATRFIPEHSQTIKLTSFSSSARPTHFSFPTRVKNIEFLDYNVSKSVGGVEYRRLKYLPPDEFFGLSDGRDSLSSSVKQVADVGSDSILLIRNDTMPMYYTSFDDDTVVLDSYDASVDATLTSSKTRAYGVKYPTFDAFSDTFVPDIDDTMFPFLLAEAKSTAMSLFKSGSDPKIEQAARRQKVYVQNDMHKVNTGRPKNNYGRH	1	yes	PSC-15__JQ809650.1___Celeribacter__phage__P12053L_gene_47	VOG2357	418.7	5.48e-78	Bacteria	hypothetical protein [n=8]; putative adaptor protein [n=2]; gp28 [n=1]; hypothetical protein ORF040 [n=1];	VOG09927	419.6	1.01e-77	Xu	REFSEQ hypothetical protein	phrog_7592	414.7	1.33e-76	tail protein	tail	cluster031069	1.7e-146	490.1	6.9	1	NA	cluster08602	6.4e-153	508.5	6.7	1	NA	NA	NA	NA	NA	NA	NA	5	15	5
KP774835.2___Citrobacter__phage__CVT22	gene_9	8651	9409	759	1	0	KP774835.2___Citrobacter__phage__CVT22_gene_9	prot_589	253	MAKMSLLEITQDILNDLDADFVNSINDTVESQQVAQIVKSTFFALMHRRNWRSNKQLLKLTASGDDALPTHMYLPENLSELTLINYNCQQAGQTRKFYKNIKFIYPDEFLRRQNMLNDAADNVDVIQDPTGVELIIRNDVPPTYWTTFDDNAIVFDSYDSELDDTLQSHKVQAFGYLTPSWIHLDSAIPDIPEEDFTLLLEEAKSRASIKIRQVADQKAEQEAQRQDRWLSRKQWRAQGGVRYPSYGRKGRK	1	yes	PSC-15__KP774835.2___Citrobacter__phage__CVT22_gene_9	VOG2357	493	1.63e-92	Bacteria	hypothetical protein [n=8]; putative adaptor protein [n=2]; gp28 [n=1]; hypothetical protein ORF040 [n=1];	VOG09927	476.2	8.67e-89	Xu	REFSEQ hypothetical protein	phrog_7592	490	2.58e-91	tail protein	tail	cluster004721	2.7e-114	384.4	1.9	1	NA	cluster03612	5.9e-109	364.1	1.4	1	NA	NA	NA	NA	NA	NA	NA	5	15	5
MF431615.1___Lentibacter__virus__vB_LenP_ICBM3	gene_16	11773	12522	750	1	0	MF431615.1___Lentibacter__virus__vB_LenP_ICBM3_gene_16	prot_678	250	MKMTLLEMVQNILSDMDSEEINSISDSNEAEQIAQVVKNTYFNMIATRFIPEHSQTIKLTSFSSSARPTHFSFPTRVKNIEFLDYNVSKSVGGVEYRRLKYLSPDEFFGLSDGRDSLSSSVKQVADVGSDSILLIRNDTMPMYYTSFDDDTVVLDSYDASVDATLTSAKTRAYGVKYPTFDAFSDTFVPDIDDTMFPFLLAEAKSTAMSLFKSGSDPKIEQAARRQKVYVQNDMHKVNTGRPKNNYGRH	1	yes	PSC-15__MF431615.1___Lentibacter__virus__vB_LenP_ICBM3_gene_16	VOG2357	416.4	1.52e-77	Bacteria	hypothetical protein [n=8]; putative adaptor protein [n=2]; gp28 [n=1]; hypothetical protein ORF040 [n=1];	VOG09927	418.8	1.46e-77	Xu	REFSEQ hypothetical protein	phrog_7592	412.5	3.68e-76	tail protein	tail	cluster031069	5.5e-147	491.7	7.4	1	NA	cluster08602	1.8e-153	510.3	7.3	1	NA	NA	NA	NA	NA	NA	NA	5	15	5
MF431616.1___Lentibacter__virus__vB_LenP_ICBM2	gene_41	27239	27952	714	-1	0	MF431616.1___Lentibacter__virus__vB_LenP_ICBM2_gene_41	prot_762	238	MTQSILSDMDSEGVNTISDTVEAMQVASVIEDTYYNIISARDIPEHRQLVKLVSLSDNTKPTHFTYPSNTRKLEEIRYNVSTTATSDYAVISYVEPMEFLNRMQETAGNTVAVKDVAGGTDIYVRNDVQPSYYTSFDDDHIVMNSFNVSVESTLSSSKTRAFGYILPTFSQTDSFEPDIDDVMLSYLLAEAKSVCFSLFKSGSDPKVEQTARRLKSYVQNDQFKTKKQNARPNYGRR	1	yes	PSC-15__MF431616.1___Lentibacter__virus__vB_LenP_ICBM2_gene_41	VOG2357	259.3	7.62e-47	Bacteria	hypothetical protein [n=8]; putative adaptor protein [n=2]; gp28 [n=1]; hypothetical protein ORF040 [n=1];	VOG09927	390.8	4.23e-72	Xu	REFSEQ hypothetical protein	phrog_7592	260.2	2.14e-46	tail protein	tail	cluster007243	2e-119	401.4	8.9	1	NA	cluster00501	6e-120	400.6	9	1	NA	NA	NA	NA	NA	NA	NA	5	15	5
MF431617.1___Lentibacter__virus__vB_LenP_ICBM1	gene_43	27988	28737	750	-1	0	MF431617.1___Lentibacter__virus__vB_LenP_ICBM1_gene_43	prot_819	250	MKMTLLEMVQNILSDMDSEEINSISDSNEAEQIAQVVKNTYFNMIATRFIPEHSQTIKLTSFSSSARPTHFSFPTRVKNIEFLDYNVSKSVGGVEYRRLKYLSPDEFFGLSDGRDSLSSSVKQVADVGSDSILLIRNDTMPMYYTSFDDDTVVLDSYDASVDATLTSAKTRAYGVKYPTFDAFSDTFVPDIDDTMFPFLLAEAKSTAMSLFKSGSDPKIEQAARRQKVYVQNDMHKVNTGRPKNNYGRH	1	yes	PSC-15__MF431617.1___Lentibacter__virus__vB_LenP_ICBM1_gene_43	VOG2357	416.4	1.52e-77	Bacteria	hypothetical protein [n=8]; putative adaptor protein [n=2]; gp28 [n=1]; hypothetical protein ORF040 [n=1];	VOG09927	418.8	1.46e-77	Xu	REFSEQ hypothetical protein	phrog_7592	412.5	3.68e-76	tail protein	tail	cluster031069	5.5e-147	491.7	7.4	1	NA	cluster08602	1.8e-153	510.3	7.3	1	NA	NA	NA	NA	NA	NA	NA	5	15	5
KC751414.1___Pseudoalteromonas__phage__RIO_1	gene_47	33448	34200	753	-1	0	KC751414.1___Pseudoalteromonas__phage__RIO_1_gene_47	prot_511	251	MSTLLQAVQTCLQYSGSFEVDSIFDTDESERTATLAREVYYRIAGKLRDAQFDSYVGTLDGVGDTSAPNYLRIPDGVRSIQFSRVQYSKDEYPELDMEDVEYLSNQDFLDVVRVNRTSEDETLKVQDPSTGAEYVIRTDTQPRYCTSFDGELIAFDSYDKEVDTTLHEQKSLIVANREKPFYLEDSFEIPLPAHLMQGFQDTLLNEYYEVIIEEAKPTVARRARVFEAKMQQDHQRIGGIQKPTVRYGRR	1	yes	PSC-15__KC751414.1___Pseudoalteromonas__phage__RIO_1_gene_47	VOG2357	382.6	6.23e-71	Bacteria	hypothetical protein [n=8]; putative adaptor protein [n=2]; gp28 [n=1]; hypothetical protein ORF040 [n=1];	VOG09927	364	7.35e-67	Xu	REFSEQ hypothetical protein	phrog_7592	381.2	4.86e-70	tail protein	tail	cluster022945	4.9e-104	351	1.5	1	NA	cluster06787	2.5e-113	378.8	1.7	1	NA	NA	NA	NA	NA	NA	NA	81	15	74
KF302037.1___Pseudoalteromonas__phage__HP1	gene_20	17034	17786	753	-1	0	KF302037.1___Pseudoalteromonas__phage__HP1_gene_20	prot_541	251	MSTLLQAVQTCLQYSGSFEVDSIFDTDESERTATLAREVYYRIAGKLRDAQFDSYVGTLDGVGDTDAPNYLRIPDGVRSVQFSRVQYSKDEYPELDMQDVEYLSNQDFLDVVRVNRTSEDDTLKVQDPSSGAEYVIRTDTQPRYCTSFDGELIAFDSYDKEVDTTLHEQKSLIVANREKQFYLEDSFEIPLPSHLMQGFQDTLLNEYYEVIIEEAKPTVARRARVFEAKMQQDHQRIGGIQKPTVRYGRR	1	yes	PSC-15__KF302037.1___Pseudoalteromonas__phage__HP1_gene_20	VOG2357	375.7	1.38e-69	Bacteria	hypothetical protein [n=8]; putative adaptor protein [n=2]; gp28 [n=1]; hypothetical protein ORF040 [n=1];	VOG09927	357.3	1.49e-65	Xu	REFSEQ hypothetical protein	phrog_7592	373.5	1.49e-68	tail protein	tail	cluster022945	4.9e-105	354.3	2.8	1	NA	cluster06787	1.4e-114	382.9	3.1	1	NA	NA	NA	NA	NA	NA	NA	81	15	74
AF189021.1___Roseophage__SIO1	gene_56	38518	39285	768	-1	0	AF189021.1___Roseophage__SIO1_gene_56	prot_056	256	MSVFSEEQVTPATQSEQVSSFEEPTSPSVVNELVGEGRKFNDVEALPKGKLEADRFIEQMKQENAALKADLEKQAYRLGVTEHLKETASASTAELSDPNNNIGGTADVANTKPSSSEADIESLVEQTLRKREQESVAKSNIALVESEREKAYGTEAAATVQQKASELGLPMAELQSMAAKSPAAFMQLMGKPAPRSNPLVQGSIRTEGSTMQASSERDFGYYQRLRKENSSLYYKPSTQRAMMADADRLGDNFYR	1	yes	PSC-16__AF189021.1___Roseophage__SIO1_gene_56	VOG4928	331.7	5.58e-61	Bacteria	hypothetical protein [n=5]; scaffold protein [n=2]; putative scaffold protein [n=1]; gp30 [n=1]; hypothetical protein ORF045 [n=1]; putative porin superfamily protein [n=1];	VOG02459	299	3.74e-54	Xu	REFSEQ hypothetical protein	phrog_7931	331.2	2.82e-60	no_hit	unknown function	cluster029168	2.2e-152	509.4	10.2	1	NA	cluster06758	5.8e-153	508.5	10.2	1	NA	NA	NA	NA	NA	NA	NA	6	16	20
AY095314.2___Vibriophage__VpV262	gene_64	38281	39015	735	-1	0	AY095314.2___Vibriophage__VpV262_gene_64	prot_122	245	MPNPFDQNDEHDTNVNPYEGKDSKEIMDELVGEGKKYKSVEDAVKALAYSQHHITTLESETAKLREAQSQAKTIDEVLAKLQQKQQPSDDNKGSDENDPAAQKPTDDIDVEATVKRLLEQHTSTAQAEANHKQVVDAVKAKYGTKAFDVWDKAEKELGINLEQMAQTSPAATLKLLGISGESAPAQSAATFKGDAKPTPTDQGERPPEGSKRLVDYMLSKGEINRSQAYNLKLKYSADPEKYRA	1	yes	PSC-16__AY095314.2___Vibriophage__VpV262_gene_64	VOG4928	283	1.79e-51	Bacteria	hypothetical protein [n=5]; scaffold protein [n=2]; putative scaffold protein [n=1]; gp30 [n=1]; hypothetical protein ORF045 [n=1]; putative porin superfamily protein [n=1];	VOG02459	309.1	4.02e-56	Xu	REFSEQ hypothetical protein	phrog_7931	348	1.48e-63	no_hit	unknown function	cluster174165	1.2e-34	123.8	7	1.2	'No Annotation Found'=2; 'Coil containing protein '=1; 'hypothetical protein'=1;	cluster03711	2.2e-29	103.6	9.6	1.2	NA	NA	NA	NA	NA	NA	NA	6	16	53
DQ163915.1___Bacteriophage__PA11	gene_46	35046	35804	759	-1	0	DQ163915.1___Bacteriophage__PA11_gene_46	prot_177	253	MADQPDVFSEQQSAPVTPEASNPASAPDASYADLLASIKNEQGQPKYDSLPKALEGLANAQQYIPQLKQQLQEKEAALAELQAKLQQTQSVEEIIERLQNQNQPPAAETPSQASGLDQQAVTELVRNLLVQEKVQMTAEQNKAQVNNTLLQKFGEKAPEVMAAKAKELGTTPKELGELASRNPAMVLALFNTSTSSVKLNTATSYNTQLNAPERQPLQRPEKSLLKGATSKEQAEFMRRIREEVYAQHGITQ	1	yes	PSC-16__DQ163915.1___Bacteriophage__PA11_gene_46	VOG4928	317.6	3.19e-58	Bacteria	hypothetical protein [n=5]; scaffold protein [n=2]; putative scaffold protein [n=1]; gp30 [n=1]; hypothetical protein ORF045 [n=1]; putative porin superfamily protein [n=1];	VOG02459	274.4	2.38e-49	Xu	REFSEQ hypothetical protein	phrog_7931	310.3	3.42e-56	no_hit	unknown function	cluster037652	1.1e-81	278.1	21.4	1	NA	cluster02516	2.8e-72	244.4	18	1	NA	NA	NA	NA	NA	NA	NA	6	16	46
EnvX___Montereybay__phage__JGI26117J46588_1000006	gene_43	28352	29119	768	-1	0	EnvX___Montereybay__phage__JGI26117J46588_1000006_gene_43	prot_244	256	MVFTEGTETTQTTQPEQTQEETSPQGSFLSKLVEAKGENWKDPEVLAKGKIEADGYIQTLEGQLTQMREDLKKKEYQEEVLEQLQKKATESTAVNNGVPNNNNSNTDGENTTRNISEEDLKSLVEQTLTQREADAVTKTNLQRVDEELDKSFGTNAEEVVKKKAAELGMSMDRLSEIASESPNAFFTLIGEPKPTFNPMVNGSVRTEGVNMQVSTDRNWQYYQKLRRENPNQYYEPKMQQQLLQDRMRLGDNFGN	1	yes	PSC-16__EnvX___Montereybay__phage__JGI26117J46588_1000006_gene_43	VOG4928	156.7	8.53e-27	Bacteria	hypothetical protein [n=5]; scaffold protein [n=2]; putative scaffold protein [n=1]; gp30 [n=1]; hypothetical protein ORF045 [n=1]; putative porin superfamily protein [n=1];	VOG02459	220	1.02e-38	Xu	REFSEQ hypothetical protein	phrog_7931	161.3	4.51e-27	no_hit	unknown function	cluster032316	1e-139	468	15.2	1	NA	cluster05046	3.3e-140	466.9	15.1	1	NA	NA	NA	NA	NA	NA	NA	6	16	20
HQ641345.1___Vibrio__phage__ICP2	gene_17	15941	16690	750	-1	0	HQ641345.1___Vibrio__phage__ICP2_gene_17	prot_279	250	MADQANLFAQAQEPQAQEPQQPVQQPAPAAPQLAPEVAAYVGEGRKYANVQAALASIPHAQSHIANLEAENQRLKQENETLKADLAKAKNLEDVVASLTVSQQPTASQVQAGLDEQAVLELLNKRDAQAQAQANQVAVTNALIGKFGDSNRATEALKAKAAELGVGFDFMKDLAAKSPKAVLSYFNVESKPTTSTVIPTATQTTAQFQTPPEPQLNFKMGSTGSTSDLVAAFRACGLAVNGGQEVSHAY	1	yes	PSC-16__HQ641345.1___Vibrio__phage__ICP2_gene_17	VOG4928	346.5	7.06e-64	Bacteria	hypothetical protein [n=5]; scaffold protein [n=2]; putative scaffold protein [n=1]; gp30 [n=1]; hypothetical protein ORF045 [n=1]; putative porin superfamily protein [n=1];	VOG02459	292.2	7.9e-53	Xu	REFSEQ hypothetical protein	phrog_7931	346.1	3.37e-63	no_hit	unknown function	cluster072482	3.3e-36	129	15.5	1.2	NA	cluster02516	2.6e-33	116.7	9.9	1.1	NA	CDD	cd14686	bZIP	63	90	0.00576449	6	16	46
JQ446452.1___Salinivibrio__phage__CW02	gene_52	33081	33875	795	-1	0	JQ446452.1___Salinivibrio__phage__CW02_gene_52	prot_385	265	MFGEDKEKKLESGEEQTSSTAPQQEQEGGGAPSAEPHNEPFADLLGTIVNDEGKPKYKSVPEAFKGLTHAQSHIQSLEQEKAALEAELQKRASVEETVQSMTQQQQEQDTPSSPGLTEEAVQKLLEQQLENREKSQREQSNKQKVAQTLKEKFGDEAEKTFYSKAEEFGMPKEQLEQLAATSPDAVLSWFGAPAKPVNPSSSSVNTTGLQPRAEEVPTMMDAGRERINLPRGEKSMLLGASSKDQASEMQRHKEAVYAKYGIKL	1	yes	PSC-16__JQ446452.1___Salinivibrio__phage__CW02_gene_52	VOG4928	342.3	4.67e-63	Bacteria	hypothetical protein [n=5]; scaffold protein [n=2]; putative scaffold protein [n=1]; gp30 [n=1]; hypothetical protein ORF045 [n=1]; putative porin superfamily protein [n=1];	VOG02459	358.4	9.1e-66	Xu	REFSEQ hypothetical protein	phrog_7931	320.1	4.21e-58	no_hit	unknown function	cluster037652	7.7e-57	196.6	20.7	1.7	NA	cluster02516	3.2e-62	211.5	17.3	1.4	NA	NA	NA	NA	NA	NA	NA	6	16	46
JQ809650.1___Celeribacter__phage__P12053L	gene_50	31178	31945	768	-1	0	JQ809650.1___Celeribacter__phage__P12053L_gene_50	prot_458	256	MSVFSEEQVTPATQSEQATTSEVGTNPSVVGELVGEGRKFNDVEALAKGKLEADRFIEQMKQENAALKADLERQAYRLGVTDHLKETASASTAELSDPNNNYGGTSNKANTQPSSSEADIESLLERALMKREQEASAKSNIAIVESELEKAFGTEATAVVQQKAAELGLPMSELQGMAAKSPAAFMQLVGKPAPVYNPLVQGSIRTEGTTMHGSSEKDFSYYQKLRRENSSLYYKPSTQRQMMADADRLGDKFYS	1	yes	PSC-16__JQ809650.1___Celeribacter__phage__P12053L_gene_50	VOG4928	348.2	3.28e-64	Bacteria	hypothetical protein [n=5]; scaffold protein [n=2]; putative scaffold protein [n=1]; gp30 [n=1]; hypothetical protein ORF045 [n=1]; putative porin superfamily protein [n=1];	VOG02459	310.7	1.93e-56	Xu	REFSEQ hypothetical protein	phrog_7931	335.6	3.83e-61	no_hit	unknown function	cluster029168	5.5e-146	488.4	9.7	1	NA	cluster06758	2.7e-147	489.9	9.8	1	NA	NA	NA	NA	NA	NA	NA	6	16	20
KP774835.2___Citrobacter__phage__CVT22	gene_6	6521	7267	747	1	0	KP774835.2___Citrobacter__phage__CVT22_gene_6	prot_586	249	MSEELFSQSAATTAPPAEPVSSPSASTYADLLGSIKNEQGVQKYATIEEALKGLANAQEYIPQVKTQLSAKEQELADLRAELEKRKAVEDVIASLQPKQPEPVVEPTSQPSQGLSAEDVQRYVEQALNQSKAQDIQTSNTSKVRSALVSKYGEKAQEVATARATELGMSMADLNKLAASSPDAALALLGASAPVSTGAPVRSSVSLPDVQRTVSLAPEKSLMRGATTKDLVAYMDKLKQAVKQQHGFN	1	yes	PSC-16__KP774835.2___Citrobacter__phage__CVT22_gene_6	VOG4928	312.7	2.89e-57	Bacteria	hypothetical protein [n=5]; scaffold protein [n=2]; putative scaffold protein [n=1]; gp30 [n=1]; hypothetical protein ORF045 [n=1]; putative porin superfamily protein [n=1];	VOG02459	279.6	2.31e-50	Xu	REFSEQ hypothetical protein	phrog_7931	308	9.79e-56	no_hit	unknown function	cluster037652	1e-64	222.5	11.6	1	NA	cluster02516	3e-61	208.3	10.2	1	NA	NA	NA	NA	NA	NA	NA	6	16	46
MF431615.1___Lentibacter__virus__vB_LenP_ICBM3	gene_13	9363	10130	768	1	0	MF431615.1___Lentibacter__virus__vB_LenP_ICBM3_gene_13	prot_675	256	MSVFSEEQVTPATQSGQATTPEAGTNPSVVGELVGEGRKFNDVEALAKGKLEADRFIEQMKQENAALKADLERQAYRLGVTDHLKETASASTAELSDPNKNYGGTSNTADTKPSSSEADIESLLERALMKREQEASAKSNIAIVESELEKAFGTEASSVVQQKAAELGLPMSELQGMAAKSPAAFMQLVGKPAPVSNPLVQGSIRTEGTTMHGSSEKDFSYYQKLRRENSSLYYKPSTQRQMMADADRLGDRFYS	1	yes	PSC-16__MF431615.1___Lentibacter__virus__vB_LenP_ICBM3_gene_13	VOG4928	333.2	2.81e-61	Bacteria	hypothetical protein [n=5]; scaffold protein [n=2]; putative scaffold protein [n=1]; gp30 [n=1]; hypothetical protein ORF045 [n=1]; putative porin superfamily protein [n=1];	VOG02459	299.4	3.11e-54	Xu	REFSEQ hypothetical protein	phrog_7931	329.4	6.31e-60	no_hit	unknown function	cluster029168	3.4e-143	479.2	8.5	1	NA	cluster06758	4.7e-145	482.6	8.6	1	NA	NA	NA	NA	NA	NA	NA	6	16	20
MF431616.1___Lentibacter__virus__vB_LenP_ICBM2	gene_44	29659	30432	774	-1	0	MF431616.1___Lentibacter__virus__vB_LenP_ICBM2_gene_44	prot_765	258	MVFTDGTATEQTDQNAEQTQVEAPPQESYLKKLVEAKGENWGDPEVLAKGKLEADGYIKNLEEQLTQMREDLKKQDYKDQVLEHLQTQAAGTTDAKPEGPNNNNGSADDQNTTASMSEEDLKSLVEKTLTQREKDSLVNQNLSFVDQELEKAFGTEAADVVKKKAAELGMSMDRLKDIAAESPNAFLTLVGEKPKNAFNPMVQGSVRTEGVNMQTTADRNWAYYQNLRRTDSHTYYTPKIQQQLMEDKMRMGDKFGN	1	yes	PSC-16__MF431616.1___Lentibacter__virus__vB_LenP_ICBM2_gene_44	VOG4928	159.7	2.3e-27	Bacteria	hypothetical protein [n=5]; scaffold protein [n=2]; putative scaffold protein [n=1]; gp30 [n=1]; hypothetical protein ORF045 [n=1]; putative porin superfamily protein [n=1];	VOG02459	293.6	4.27e-53	Xu	REFSEQ hypothetical protein	phrog_7931	160	7.96e-27	no_hit	unknown function	cluster032316	1.1e-131	441.7	14.1	1	NA	cluster05046	4.4e-132	440.3	14.3	1	NA	NA	NA	NA	NA	NA	NA	6	16	20
MF431617.1___Lentibacter__virus__vB_LenP_ICBM1	gene_46	30380	31147	768	-1	0	MF431617.1___Lentibacter__virus__vB_LenP_ICBM1_gene_46	prot_822	256	MSVFSEEQVTPATQSGQATTPEAGTNPSVVGELVGEGRKFNDVEALAKGKLEADRFIEQMKQENAALKADLERQAYRLGVTDHLKETASASTAELSDPNKNYGGTSNTADTKPSSSEADIESLLERALMKREQEASAKSNIAIVESELEKAFGTEASSVVQQKAAELGLPMSELQGMAAKSPAAFMQLVGKPAPVSNPLVQGSIRTEGTTMHGSSEKDFSYYQKLRRENSSLYYKPSTQRQMMADADRLGDRFYS	1	yes	PSC-16__MF431617.1___Lentibacter__virus__vB_LenP_ICBM1_gene_46	VOG4928	333.2	2.81e-61	Bacteria	hypothetical protein [n=5]; scaffold protein [n=2]; putative scaffold protein [n=1]; gp30 [n=1]; hypothetical protein ORF045 [n=1]; putative porin superfamily protein [n=1];	VOG02459	299.4	3.11e-54	Xu	REFSEQ hypothetical protein	phrog_7931	329.4	6.31e-60	no_hit	unknown function	cluster029168	3.4e-143	479.2	8.5	1	NA	cluster06758	4.7e-145	482.6	8.6	1	NA	NA	NA	NA	NA	NA	NA	6	16	20
KC751414.1___Pseudoalteromonas__phage__RIO_1	gene_50	35796	36482	687	-1	0	KC751414.1___Pseudoalteromonas__phage__RIO_1_gene_50	prot_514	229	MFEDETKSEQSQTEQASDQSALFKVGDREYDAESASKKISSADAHIAQLEKELQDFRGSMSKLDKLDKLEELLQAKQAPAHEPETTPTQSAPQAQFNKDELLQELLGELDSRSKETVLQANEQKAVQAAKDKFGTDYQTKLLERGQELQMDKKAIQEFARTKPAAFAALFGLNVQGKESASPSSSVYIKPEPKSERSVSEVLMSKGSARERTDFIADALKNPDKYLKG	1	yes	PSC-16__KC751414.1___Pseudoalteromonas__phage__RIO_1_gene_50	VOG4928	239.8	4.92e-43	Bacteria	hypothetical protein [n=5]; scaffold protein [n=2]; putative scaffold protein [n=1]; gp30 [n=1]; hypothetical protein ORF045 [n=1]; putative porin superfamily protein [n=1];	VOG02459	219.8	1.13e-38	Xu	REFSEQ hypothetical protein	phrog_7931	66.4	1.56e-08	no_hit	unknown function	cluster171091	4.6e-146	488.2	15.9	1	'No Annotation Found'=4; 'Scaffold protein '=2; 'hypothetical protein'=2;	cluster26398	7.3e-147	488.2	15.9	1	'No Annotation Found'=4; 'Scaffold protein '=2; 'hypothetical protein'=2;	NA	NA	NA	NA	NA	NA	128	16	53
KF302037.1___Pseudoalteromonas__phage__HP1	gene_23	19364	20050	687	-1	0	KF302037.1___Pseudoalteromonas__phage__HP1_gene_23	prot_544	229	MFEDETKSEQSQTEQASDQSALFKVGDREYDVESASKKISSADTHIAQLEKELQDLRGSMSKLDKLDKLEELLQAKQAPAHEPETTPTQAAPQAQFNKDELLQELLGELDSRSQETVLKANEQKAVQAAKDKFGTDYQTKLLERGQELQMDKKAIQDFARTKPAAFAALFGLNTQGKESASPSSSVYIKPEPKSDRSVSEVLMSKGSAKDRTDFIADALKNPDKYLKN	1	yes	PSC-16__KF302037.1___Pseudoalteromonas__phage__HP1_gene_23	VOG4928	236.5	2.2e-42	Bacteria	hypothetical protein [n=5]; scaffold protein [n=2]; putative scaffold protein [n=1]; gp30 [n=1]; hypothetical protein ORF045 [n=1]; putative porin superfamily protein [n=1];	VOG02459	217.1	3.77e-38	Xu	REFSEQ hypothetical protein	phrog_7931	71.9	1.36e-09	no_hit	unknown function	cluster171091	1.2e-152	509.8	16.9	1	'No Annotation Found'=4; 'Scaffold protein '=2; 'hypothetical protein'=2;	cluster26398	1.8e-153	509.8	16.9	1	'No Annotation Found'=4; 'Scaffold protein '=2; 'hypothetical protein'=2;	NA	NA	NA	NA	NA	NA	128	16	53
AF189021.1___Roseophage__SIO1	gene_1	441	851	411	1	0	AF189021.1___Roseophage__SIO1_gene_1	prot_001	137	MHCDIAVLDDVVVFENAYTNEGRNKVKSQYSLLSSIEGSEAQEWVVGTRYHPKDLYSDLMGMEEDIYSKEGELVGKENIYEVMEKAVEDNGDGTGEFLWPRQLRKDGKFFGFDVQILAKKRGQYLDRVQFRAQYYQ	1	yes	PSC-32__AF189021.1___Roseophage__SIO1_gene_1	no_hit	no_hit	no_hit	no_hit	no_hit	VOG00535	49	2.64e-05	XhXr	sp|P10310|TERL_BPT3 Terminase, large subunit	phrog_38	49.1	3.83e-05	terminase large subunit	head and packaging	cluster022639	1.3e-84	288	1.8	1	NA	cluster08222	7.5e-86	289.5	1.8	1	NA	NA	NA	NA	NA	NA	NA	1	32	137
AF189021.1___Roseophage__SIO1	gene_2	820	1521	702	1	0	AF189021.1___Roseophage__SIO1_gene_2	prot_002	234	VFSLEHSITNDPTDPDSQPIAYEKFQYYDKKHLTRDGGQWFYKGQKLNVSAAVDFAYSVSKRADYTAIVVIGVDSENNVYVLDIDRFKTDKISEYFRHILDLLNRWDFRKLRAECTAAQSAIVSELKDNYIKPNGLALKIDEHRPNRHQGSKEERIAAILEPRYDNLQMYHYRGGNCQVLEEELVSYNPAHDDCKDCLAAAVEVAVKPSSAVKRKRSQDNNVVFHPKFGGVAF	1	yes	PSC-32__AF189021.1___Roseophage__SIO1_gene_2	VOG6488	35.4	0.00451	Bacteria	terminase large subunit [n=4]; putative DNA packaging protein [n=1]; terminase [n=1]; putative terminase [n=1];	VOG00535	57.5	5.78e-07	XhXr	sp|P10310|TERL_BPT3 Terminase, large subunit	phrog_20726	575.8	4.37e-108	no_hit	unknown function	cluster022639	3.5e-138	464.8	1.8	1	NA	cluster08222	1.1e-145	487	2.1	1	NA	NA	NA	NA	NA	NA	NA	1	32	138
AF189021.1___Roseophage__SIO1	gene_5	3161	4507	1347	-1	0	AF189021.1___Roseophage__SIO1_gene_5	prot_005	449	MVAYRVAWELTKNPTLRVLYISATSNLAQKQLSFIKNIFESDIHQKYWPEHLHKDESKREKWTTSEIALDHPDRKKEAIRDPSIFTGGLTTSLTGMHCDIAVLDDVVVFENAYTNEGRNKVKSQYSLLSSIEGSEAQEWVVGTRYHPKDLYSDLMGMEEDIYSKEGELVGKENIYEVMEKAVEDNGDGTGEFLWPRQLRKDGKFFGFDVQILAKKRGQYLDRVQFRAQYYNDPTDPDSQPIAYEKFQYYDKKHLTRDGGQWFYKGQKLNVSAAVDFAYSVSKRADYTAIVVIGVDSENNVYVLDIDRFKTDKISEYFRHILDLLNRWDFRKLRAECTAAQSAIVSELKDNYIKPNGLALKIDEHRPNRHQGSKEERIAAILEPRYDNLQMYHYRGGNCQ…	1	yes	PSC-32__AF189021.1___Roseophage__SIO1_gene_5	VOG7407	39.6	0.00067	Bacteria	intein-containing putative terminase large subunit precursor [n=5]; terminase large subunit precursor [n=1];	VOG00535	141	2.8e-23	XhXr	sp|P10310|TERL_BPT3 Terminase, large subunit	phrog_20726	459.7	2.2e-85	no_hit	unknown function	cluster022639	2.1e-278	927.4	6.3	1	NA	cluster08222	1.7e-286	951.5	5.7	1	NA	NA	NA	NA	NA	NA	NA	1	32	1
AY095314.2___Vibriophage__VpV262	gene_67	41062	42669	1608	-1	0	AY095314.2___Vibriophage__VpV262_gene_67	prot_125	536	MNTTASDDQNDIPLEDPRLIELREACLHSLWIFAQAVEPHRVYGECHKELFDWWQEMELEEVLNTLALMPRDHQKSHCIAVWVCWQIFKNPAVTIAYVCATESLAILQLYDIKQILTSDEFTRLSPDMIEPMEKKRQKWAETAIIVDHPIRKKERPRDPTVLATGLDSNNIGAHCNIMVKDDVVIDKNSLTETARQKVEAKAGHLSSILTTDGMEFCVGTRYHPKDHYQTLIDMTEEVWEGDQLVGERPVYAVHTRVVEVEGVFLWPRMARESDGKMFGFDRAQLSRKKAKYRKDMRNFYCQYYNDPNAINEGGIEKSMFLYYDKEKVVRRKGSWWVGKRKVNIIACQDFAYSVQTGSDWTALFILGMDKDKRIYILDIVRYQTKKPSVYWKNLETAYN…	1	yes	PSC-32__AY095314.2___Vibriophage__VpV262_gene_67	no_hit	no_hit	no_hit	no_hit	no_hit	VOG00535	130.5	3.18e-21	XhXr	sp|P10310|TERL_BPT3 Terminase, large subunit	phrog_38	172.4	3.07e-29	terminase large subunit	head and packaging	cluster069229	2.6e-188	630.5	4	1	NA	cluster03316	2.7e-158	528.8	1.7	1	NA	Pfam	PF17289	Terminase RNaseH-like domain	348	471	2.2E-7	1	32	1
DQ163915.1___Bacteriophage__PA11	gene_50	38442	40049	1608	-1	0	DQ163915.1___Bacteriophage__PA11_gene_50	prot_181	536	MQEEDWLIEAEKKLKRMPEKAKEVRERALEDLYFFAKLVNPGYVYGEVHREIFAWMQDYTLFGRGSDLTSNKLIMLPRAHLKSHMVATWCAWIITRHPEVTILYISATATLAETQLYAVKNILASSVYNRYFPEYIHPQEGKREKWSSNAMSIDHVQRKKEGIRDATIATAGLTTNTTGWHADIIVADDLVVPENAYTEDGRESVQKKSSQFTSIRNAGGFTMACGTRYHPSDIYATWRSQKYDIFDDEGMKIDEHPVWEIKEYAVEKDNIFLWPRTIREDGKAFGFDIRVLARIKAEYSDRVQFFAQYYNDPNDPGSDRISRDKFQYYNPRLLKKEGSRWTYNGRRLNIYAAVDFAFSLSRQADYTAIVVIGIDCDNNIYVVDIDRFKSDKTLEYFQH…	1	yes	PSC-32__DQ163915.1___Bacteriophage__PA11_gene_50	no_hit	no_hit	no_hit	no_hit	no_hit	VOG00535	153.8	8.88e-26	XhXr	sp|P10310|TERL_BPT3 Terminase, large subunit	phrog_20726	226	1.01e-39	no_hit	unknown function	cluster017922	0	1051.4	7.5	1	NA	cluster03316	1.4e-295	981.8	6.3	1	NA	NA	NA	NA	NA	NA	NA	1	32	1
EnvX___Montereybay__phage__JGI26117J46588_1000006	gene_46	31112	32647	1536	-1	0	EnvX___Montereybay__phage__JGI26117J46588_1000006_gene_46	prot_247	512	MATIDQIRQAAETDLATFIKLIAPEQVLGQCHEDVCDWWTRPDHKSHQLLLFPRDHGKSRLIAYRVAWELTKEPTLRILYISATANLAEKQLGFIKGILTSEIYTRYWPDHVNADEGKRTRWTNSEIMLDHPDRKKENVRDPSVFTGGLTTSLTGMHCDIAVLDDIVVYENAYTGEGRNKVKSQYSLLSSIEGADAKEWVVGTRYHPADLYNDLLQMTEDLYDDDGNKTGDDNIYEIFERPVEDSGDGTGQMLWPRTQRKDGKWFGFDIRVLAKKRGQYLDKGQFRAQYYNDPSDPDNVPVGRDKFQYYDRKHLRQDNGYWFYRDNKLNVYAAVDFAFSLSKKADXTAIVVIGIDAENNVYVLDIDRFKTDRISDYFQHIFDLSTKWSFRKMRAETTVA…	1	yes	PSC-32__EnvX___Montereybay__phage__JGI26117J46588_1000006_gene_46	VOG5023	34.3	0.00743	Bacteria	hypothetical protein [n=5]; putative head assembly cofactor [n=1];	VOG00535	153.4	1.04e-25	XhXr	sp|P10310|TERL_BPT3 Terminase, large subunit	phrog_20726	290.3	2.82e-52	no_hit	unknown function	cluster006851	0	1148.6	4.3	1	NA	cluster00128	0	1072.7	3.5	1	NA	NA	NA	NA	NA	NA	NA	1	32	1
HQ641345.1___Vibrio__phage__ICP2	gene_20	18739	20265	1527	-1	0	HQ641345.1___Vibrio__phage__ICP2_gene_20	prot_282	509	VSKIDEIREAAESDFWTFCRLVTPQYVYGEVHKEVAKWMESNEYDQLLLLPRGHLKSHMMALWVAWWVTKHPETTILYISATSELAEMQLYDIKNIMTSKIYRRYWPDMINEEEGKREKWTNSAIAVDHPKRKMEGVRDFTIKTAGLTTNTTGWHADVIISDDVVVPDNAYTEDGRRKVAAAMSQMESILNADGIVKACGTRYHPADIYDTWKNQHQPVFDEHGEETGEERPVWDIFERVVEEDGVFLWPRTSRGSDGKKFGFDNRVLAKKKAKYVDRVQFFAQYYNDPNDPESARLNYSSFQYYDEKFVTYREGRYWFKDRPLNIFAAVDFAFSLSKKADFTAIVVIGIDSEGYIYVLDIDRFKTDKINDYYDHISALHSKWEFKKLRAEVTVAQQII…	1	yes	PSC-32__HQ641345.1___Vibrio__phage__ICP2_gene_20	VOG6488	36.3	0.00296	Bacteria	terminase large subunit [n=4]; putative DNA packaging protein [n=1]; terminase [n=1]; putative terminase [n=1];	VOG00535	156.3	2.83e-26	XhXr	sp|P10310|TERL_BPT3 Terminase, large subunit	phrog_20726	222.2	5.63e-39	no_hit	unknown function	cluster041087	2.6e-261	871.3	6.6	1	NA	cluster03316	7.4e-249	827.6	6.9	1	NA	NA	NA	NA	NA	NA	NA	1	32	1
JQ446452.1___Salinivibrio__phage__CW02	gene_55	36031	37638	1608	-1	0	JQ446452.1___Salinivibrio__phage__CW02_gene_55	prot_388	536	MEKWLQDAYKKIERMPDEAKEIRERALGDLFFFARLVNPGYVYGQIHKDLFRWMQDYTLFGKGGDLTANKLIMLPRAHLKSHMVATWCAWIVARHPEVTMLYVSATAELAITQLYAIQNILGSSKFQRYFPEYINPQEGLREKWSSTKITVDHPQRRKEGIRDATIATAGLTTNTTGWHADVIVADDLVVPENAYTEEGRESVSKKASQFTSIRNAGGFTMACGTRYHPSDIYAVWKEQTYEVYDDEGLLTDVRPVWEIKEHAVETDGIFLWPRTVRNDGKAFGFDKGALARIKAEYTDRVQFYAQYYNDPNDPGSNRISRDTFQYYNPRFLLNEGGVWKYNGKRLNIYAAVDFAFSLSKKADYTAIVVIGVDCDGNVYVLDIDRFKTDRVAEYFKHVR…	1	yes	PSC-32__JQ446452.1___Salinivibrio__phage__CW02_gene_55	VOG6488	34.3	0.00712	Bacteria	terminase large subunit [n=4]; putative DNA packaging protein [n=1]; terminase [n=1]; putative terminase [n=1];	VOG00535	158.2	1.23e-26	XhXr	sp|P10310|TERL_BPT3 Terminase, large subunit	phrog_20726	249.9	2.18e-44	no_hit	unknown function	cluster017922	0	1034.5	5.5	1	NA	cluster03316	4e-298	990.2	4.7	1	NA	NA	NA	NA	NA	NA	NA	1	32	1
JQ809650.1___Celeribacter__phage__P12053L	gene_53	34042	35586	1545	-1	0	JQ809650.1___Celeribacter__phage__P12053L_gene_53	prot_461	515	MASIQEIREAAEASLVTFIRLVAPQRVLGSCHEDVCKWWTRQDAKSHQLLLFPRDHGKSALVAYRVAWELTKNPTLRVLYISATSNLAQKQLSFIKNIFESDIHQKYWPDHLNKDESKREKWTTSEIALDHPDRKKEAIRDPSIFTGGLTTSLTGMHCDIAVLDDVVVFENAYSNEGRNKVKSQYSLLSSIEGSEAQEWVVGTRYHPKDLYSDLMGMEEDLYSKEGELVGKENIYEVMERAVEDNGDGTGEFLWPRQLRKDGKMFGFDIPILAKKRGQYLDRVQFRAQYYNDPTDPDSQPIAYEKFQYYDKKHLTRDGGQWFYKGQKLNVSAAVDFAYSVSKRADYTAIVVIGVDSENNVFVLDIDRFKTDKISEYFRHILDLLNRWDFRKLRAECTAA…	1	yes	PSC-32__JQ809650.1___Celeribacter__phage__P12053L_gene_53	VOG7407	40.4	0.00046	Bacteria	intein-containing putative terminase large subunit precursor [n=5]; terminase large subunit precursor [n=1];	VOG00535	167.4	1.92e-28	XhXr	sp|P10310|TERL_BPT3 Terminase, large subunit	phrog_20726	505.1	2.95e-94	no_hit	unknown function	cluster022639	0	1104.2	2.5	1	NA	cluster08222	0	1141.2	2.7	1	NA	NA	NA	NA	NA	NA	NA	1	32	1
KC751414.1___Pseudoalteromonas__phage__RIO_1	gene_53	38615	40195	1581	-1	0	KC751414.1___Pseudoalteromonas__phage__RIO_1_gene_53	prot_517	527	MELQELREVCEEDLYTFACVMFPDRYYGDVHKELFHYFQHGESDYQLALIPRDHQKSHCLAVYAAWKLTVAPWWTFLYVSANPGLGQEQLNVVVDILRSDSHRLLWPEHLNYVKDRDGSMKHKPTGTWTNEVIKLDHPERKKRMVRDPSIRVTSVKSGKTGYHCNEVLFDDLVTDENYDSDAEKQDVVKCYKNCTKIMTTGSKAKAVGTRYGEDDLYANILEITVPVFVDDEYDRDDKLWTIFERVVEDSPNRAGNGNFLWPRLKMENGEWYGFDVQQLAIKKANMSIDGDITGYFAQYYNDPNDSSLQSISRENFQYMNPKHLTHTGNTWQYSGKDLKLVAAMDLAFSSSASRRRDFTAILVVGMDTDGYLYVLDLDKFQTEKYEVFYKKVADLHRDW…	1	yes	PSC-32__KC751414.1___Pseudoalteromonas__phage__RIO_1_gene_53	VOG6488	52.9	1.65e-06	Bacteria	terminase large subunit [n=4]; putative DNA packaging protein [n=1]; terminase [n=1]; putative terminase [n=1];	VOG00535	121.5	1.8e-19	XhXr	sp|P10310|TERL_BPT3 Terminase, large subunit	phrog_38	170.5	7.1e-29	terminase large subunit	head and packaging	cluster016296	8.6e-259	863.2	2.9	1	NA	cluster07622	1e-280	932.9	3.6	1	NA	NA	NA	NA	NA	NA	NA	1	32	1
KF302037.1___Pseudoalteromonas__phage__HP1	gene_26	22184	23764	1581	-1	0	KF302037.1___Pseudoalteromonas__phage__HP1_gene_26	prot_547	527	MELQELREVCEEDLYTFACVMFPDRYYGDVHKELFHYFQHGESDYQLALIPRDHQKSHCLAVYAAWKLTVAPWWTFLYVSANPGLGQEQLNVVVDILRSDSHRLLWPEHLNYVKDRDGSMKHKPTGTWTNEVIKLDHPERKKRMVRDPSIRVTSVKSGKTGYHCNEVLFDDLVTDENYDSDAEKQDVVKCYKNCTKIMTTGSKAKAVGTRYGEDDLYANILEITVPVFVDDEYDRDDKLWTIFERVVEDSPNRAGNGNFLWPRLKMENGEWYGFDVQQLAIKKANMSIDGDITGYFAQYYNDPNDSSLQSISRENFQYMNPKHLTHTGNTWQYSGKDLKLVAAMDLAFSSSASRRRDFTAILVVGMDTDGYLYVLDLDKFQTEKYEVFYKKVADLHRDW…	1	yes	PSC-32__KF302037.1___Pseudoalteromonas__phage__HP1_gene_26	VOG6488	53.9	1.07e-06	Bacteria	terminase large subunit [n=4]; putative DNA packaging protein [n=1]; terminase [n=1]; putative terminase [n=1];	VOG00535	122.4	1.19e-19	XhXr	sp|P10310|TERL_BPT3 Terminase, large subunit	phrog_38	171.6	4.37e-29	terminase large subunit	head and packaging	cluster016296	1.5e-259	865.7	3.5	1	NA	cluster07622	2.1e-281	935.2	4.2	1	NA	NA	NA	NA	NA	NA	NA	1	32	1
KP774835.2___Citrobacter__phage__CVT22	gene_3	2731	4335	1605	1	0	KP774835.2___Citrobacter__phage__CVT22_gene_3	prot_583	535	MKQWLKDVQEQLKRMPKEALEVREMAMNDLYTFAKLVNPGYMYGDVHKEFFKWIQEYSLYGKGEGVNSNKLIMLPRAHLKSHMVATACAWFIVRHPEITVFYVSATAALAEKQLAAIKEILTSDKFTRYWPEYVHPQEGKRAKWNNSDIIIDHPARRKEGVRDSTVATAGLTTNTTGWHADLIIADDLVVPDNAYTEKGREDVAKAASQFTSIRNAGGFTLACGTRYHPNDIYYTWKGLTFEEFDEETGEVLNEHPVWNIKEYAVESDGRFIWPRAIREDGKAYGFNRSALARVKAEYIDKTQFYAQYYNNPNDAGSARISEDKFQYYDKKFLRQEGGYWYMHGRRLNVYAAIDFAFSMGQRSDYTAIVVIGIDSEGDIYILDIDRFKTDKIAEYYKHI…	1	yes	PSC-32__KP774835.2___Citrobacter__phage__CVT22_gene_3	VOG6488	36.6	0.00259	Bacteria	terminase large subunit [n=4]; putative DNA packaging protein [n=1]; terminase [n=1]; putative terminase [n=1];	VOG00535	157.7	1.54e-26	XhXr	sp|P10310|TERL_BPT3 Terminase, large subunit	phrog_20726	243.1	4.61e-43	no_hit	unknown function	cluster017922	7.4e-278	925.9	7.5	1	NA	cluster03316	8.8e-277	919.8	6.4	1	NA	NA	NA	NA	NA	NA	NA	1	32	1
MF431615.1___Lentibacter__virus__vB_LenP_ICBM3	gene_10	5722	7266	1545	1	0	MF431615.1___Lentibacter__virus__vB_LenP_ICBM3_gene_10	prot_672	515	MASVNEIREAAEASLVTFIRLVAPQRVLGSCHEDVCKWWTRQDAKSHQLLLFPRDHGKSALVAYRVAWELTKNPTLRVLYISATSNLAQKQLSFIKNIFESDIHQKYWPDHLHKDESKREKWTTSEIALDHPDRKKEAIRDPSIFTGGLTTSLTGMHCDIAVLDDVVVFENAYSNEGRNKVKSQYSLLSSIEGSEAQEWVVGTRYHPKDLYSDLMGMEEDLYSKEGELVGKENIYEVMERAVEDNGDGTGEFLWPRQLRKDGKMFGFDIPILAKKRGQYLDRVQFRAQYYNDPTDPDSQPIAYEKFQYYDKKHLTRDGGQWFYKGRKLNVSAAVDFAYSVSKRADYTAIVVIGVDSENNVFVLDIDRFKTDKISEYFRHILDLLNRWDFRKLRAECTAA…	1	yes	PSC-32__MF431615.1___Lentibacter__virus__vB_LenP_ICBM3_gene_10	VOG7407	42.1	0.000214	Bacteria	intein-containing putative terminase large subunit precursor [n=5]; terminase large subunit precursor [n=1];	VOG00535	168	1.46e-28	XhXr	sp|P10310|TERL_BPT3 Terminase, large subunit	phrog_20726	500.6	2.19e-93	no_hit	unknown function	cluster022639	0	1104.2	2.5	1	NA	cluster08222	0	1139.1	2.7	1	NA	NA	NA	NA	NA	NA	NA	1	32	1
MF431616.1___Lentibacter__virus__vB_LenP_ICBM2	gene_47	32453	33988	1536	-1	0	MF431616.1___Lentibacter__virus__vB_LenP_ICBM2_gene_47	prot_768	512	MTSLEQIKLAAEADLVTFIKLVAPEQVLGQCHEDVCDWWTRPDAKSHQLLLFPRDHGKSRLVAYRVAWELTKNPTLRVLYISATANLAEKQLSFIKSILTSDTYYRYWPDHVHREEGKRSKWTNSEIALDHPDRKKEKIRDPSVFTGGLTTSLTGMHCDIAVLDDVVVYENAYSGEGRNKVKSQYSLLSSIEGADAQEWVVGTRYHPIDLYNDLLQMVEDLYDDEGEKVGEENIYEVFQKPVEDRGDGTGEMLWPRMQRKDGKWFGFDIKVLAKKRGQYLDKGQFRAQYYNDPSDPDNVPVGSEKFQYYEQKHLKQENGFWFFRDKKLNVFAAVDFAFSLSKKADYTAIVVIGIDADNNVYVLDIDRFRTDRISVYFDHIFHLVSKWSFRKMRAETTVA…	1	yes	PSC-32__MF431616.1___Lentibacter__virus__vB_LenP_ICBM2_gene_47	VOG7407	37.6	0.00165	Bacteria	intein-containing putative terminase large subunit precursor [n=5]; terminase large subunit precursor [n=1];	VOG00535	159.6	6.64e-27	XhXr	sp|P10310|TERL_BPT3 Terminase, large subunit	phrog_20726	267.1	9.3e-48	no_hit	unknown function	cluster006851	0	1095.9	3.7	1	NA	cluster00128	0	1046.9	3.2	1	NA	NA	NA	NA	NA	NA	NA	1	32	1
MF431617.1___Lentibacter__virus__vB_LenP_ICBM1	gene_49	33244	34788	1545	-1	0	MF431617.1___Lentibacter__virus__vB_LenP_ICBM1_gene_49	prot_825	515	MASVNEIREAAEASLVTFIRLVAPQRVLGSCHEDVCKWWTRQDAKSHQLLLFPRDHGKSALVAYRVAWELTKNPTLRVLYISATSNLAQKQLSFIKNIFESDIHQKYWPDHLHKDESKREKWTTSEIALDHPDRKKEAIRDPSIFTGGLTTSLTGMHCDIAVLDDVVVFENAYSNEGRNKVKSQYSLLSSIEGSEAQEWVVGTRYHPKDLYSDLMGMEEDLYSKEGELVGKENIYEVMERAVEDNGDGTGEFLWPRQLRKDGKMFGFDIPILAKKRGQYLDRVQFRAQYYNDPTDPDSQPIAYEKFQYYDKKHLTRDGGQWFYKGRKLNVSAAVDFAYSVSKRADYTAIVVIGVDSENNVFVLDIDRFKTDKISEYFRHILDLLNRWDFRKLRAECTAA…	1	yes	PSC-32__MF431617.1___Lentibacter__virus__vB_LenP_ICBM1_gene_49	VOG7407	42.1	0.000214	Bacteria	intein-containing putative terminase large subunit precursor [n=5]; terminase large subunit precursor [n=1];	VOG00535	168	1.46e-28	XhXr	sp|P10310|TERL_BPT3 Terminase, large subunit	phrog_20726	500.6	2.19e-93	no_hit	unknown function	cluster022639	0	1104.2	2.5	1	NA	cluster08222	0	1139.1	2.7	1	NA	NA	NA	NA	NA	NA	NA	1	32	1
AF189021.1___Roseophage__SIO1	gene_3	1581	2429	849	1	0	AF189021.1___Roseophage__SIO1_gene_3	prot_003	283	MAGTTIDIESMIDPHSLAVEIANRWTSWNNARSEKVKEWKELRNYIYATDTRTTSNNKLPWSNSTTTPKLTQIADNLHANYFAALFPQKRWFRFEATDADSDTKIKRSIIQAYMQNKLRQSDFVNTTSKLVNDYIQYGNCFATVDFERKVTKYEDGDRIVNYVGPKVVRISPFDICFNPLAANFSDTPKIVRSVLTLGEIQRMVENDSSKGYMADIFNKMLGNRGSARGNEVDINKSEGFVADGFASLTDYYESDYVEVLTFYGDIYDKVRVSSLTTVSLLL	1	yes	PSC-33__AF189021.1___Roseophage__SIO1_gene_3	VOG2386	162.5	6.27e-28	Bacteria	portal protein [n=34]; hypothetical protein [n=22]; putative portal protein [n=18]; N4 gp59-like protein [n=3]; 94 kDa protein [n=2]; portal (connector) protein [n=2]; hypothetical protein ORF047 [n=1]; PfWMP4_39 [n=1]; putative structural protein [n=1]; poly(3-hydroxybutyrate) depolymerase [n=1];	VOG02597	156.8	2.33e-26	XhXpXrXs	sp|A0MZE1|PORTL_BPN4 Probable portal protein	phrog_332	125	5.48e-20	head-tail adaptor	connector	cluster029242	1.6e-167	562.1	6.6	1	NA	cluster01890	2.5e-153	512.4	6.7	1	NA	Pfam	PF12236	Bacteriophage head to tail connecting protein	30	145	8.3E-8	2	33	139
AF189021.1___Roseophage__SIO1	gene_58	39527	39898	372	-1	0	AF189021.1___Roseophage__SIO1_gene_58	prot_058	124	SPLGLYFFTQITRDDIKANGKIVPMGARHFAERAQRVQNLTTMYQIKASDPTVAAHLSGKEFARLLADELGEPALFKENVSVSEQMETQKVATEAQIEFEAEQEEMVDQGSQELQPAPEEPLE	1	yes	PSC-33__AF189021.1___Roseophage__SIO1_gene_58	VOG2386	54.7	7.54e-07	Bacteria	portal protein [n=34]; hypothetical protein [n=22]; putative portal protein [n=18]; N4 gp59-like protein [n=3]; 94 kDa protein [n=2]; portal (connector) protein [n=2]; hypothetical protein ORF047 [n=1]; PfWMP4_39 [n=1]; putative structural protein [n=1]; poly(3-hydroxybutyrate) depolymerase [n=1];	VOG02597	66.2	1.17e-08	XhXpXrXs	sp|A0MZE1|PORTL_BPN4 Probable portal protein	no_hit	no_hit	no_hit	no_hit	no_hit	cluster167302	1.9e-69	237.6	0.9	1	'No Annotation Found'=5; 'Uncharacterized protein '=2; 'Probable portal protein'=1;	cluster16385	2.2e-59	201.9	0.5	1	'No Annotation Found'=8; 'Putative portal protein '=2; 'Probable portal protein'=1; 'Uncharacterized protein '=1;	NA	NA	NA	NA	NA	NA	2	33	151
AY095314.2___Vibriophage__VpV262	gene_66	39266	41065	1800	-1	0	AY095314.2___Vibriophage__VpV262_gene_66	prot_124	600	MSTDIKTLQKMLEGRDDDRAFIDELVVLFTNMENARAQKDREDKELMDYIDATDTRKTSNSKLPFKNSTTINKLAHLHLMITTSYMEHLLPNRNWVDFVGFDNDSVNAEKREIARSYVRGKVEASNLEGVIERMVDDFAVRGFCVAHTRHVKRMTVTAENQVIKNYSGTVTERLSPSDVFWDVTADSLPKAAKCIRQLYTLGSLKREIEEGTFPLMSMEDFQKLREERRTIREALADGYNGRRKFDSLHKKGYGSMMNYINEGVVEVLTFMGDFYDEENDELWNNYEITVIDRKIIGRKQSKDTWDGSQNLHIAVYEFQKDTLCPIGPLHRLTGMQYKLDKRENFREDLHDRFLHPSLKKVGDVREKGMRGGPNHVFEVEETGDVQYMTPPAEVLQPDN…	1	yes	PSC-33__AY095314.2___Vibriophage__VpV262_gene_66	VOG2386	295.9	5.5e-54	Bacteria	portal protein [n=34]; hypothetical protein [n=22]; putative portal protein [n=18]; N4 gp59-like protein [n=3]; 94 kDa protein [n=2]; portal (connector) protein [n=2]; hypothetical protein ORF047 [n=1]; PfWMP4_39 [n=1]; putative structural protein [n=1]; poly(3-hydroxybutyrate) depolymerase [n=1];	VOG02597	259.4	2.04e-46	XhXpXrXs	sp|A0MZE1|PORTL_BPN4 Probable portal protein	phrog_332	185.4	8.91e-32	head-tail adaptor	connector	cluster001731	2.8e-153	515.1	3.4	1	NA	cluster01664	7.8e-153	511	2.6	1	NA	NA	NA	NA	NA	NA	NA	2	33	3
DQ163915.1___Bacteriophage__PA11	gene_48	36190	37944	1755	-1	0	DQ163915.1___Bacteriophage__PA11_gene_48	prot_179	585	MSVKVAELNSLLVRDSSAQWVAYLWDRFNNQRRQKIEEWKELRNYVFATDTTTTSNQGLPWKNSTTLPKLCQIRDNLHSNYFSSLFPNDDWLRWVGYGKGDSTKTKAKAIQAYMSNKCRESHFRTEVSKLIYDYIDYGNAFATVSFEAKYKEMTDGTLVPDYIGPRLVRISPLDIVFNPLATSISDTFKIVRSVKTKGELMRLAQDEPEQSYWLEALKRREEICRHLGGYSVEDFDKAAGFDVDGFGNLYEYYMSDWVEILEFYGDYHDKETGELQTNRIITVVDRSTEVRNESIPTWFGSAPIYHVGWRFRPDNLWAMGPLDNLVGMQYRIDHLENAKADAVDLIIQPPLKIIGEVEEFVWGPGAEIHLDQGGDVQEIAKNVNYIINADNQIQMLEDR…	1	yes	PSC-33__DQ163915.1___Bacteriophage__PA11_gene_48	VOG2386	410.7	2.04e-76	Bacteria	portal protein [n=34]; hypothetical protein [n=22]; putative portal protein [n=18]; N4 gp59-like protein [n=3]; 94 kDa protein [n=2]; portal (connector) protein [n=2]; hypothetical protein ORF047 [n=1]; PfWMP4_39 [n=1]; putative structural protein [n=1]; poly(3-hydroxybutyrate) depolymerase [n=1];	VOG02597	376.8	2.36e-69	XhXpXrXs	sp|A0MZE1|PORTL_BPN4 Probable portal protein	phrog_332	268.7	4.56e-48	head-tail adaptor	connector	cluster002792	0	1038.4	0.2	1	NA	cluster03515	0	1027.2	0.2	1	NA	Pfam	PF12236	Bacteriophage head to tail connecting protein	290	460	4.3E-5	2	33	3
EnvX___Montereybay__phage__JGI26117J46588_1000006	gene_45	29367	31112	1746	-1	0	EnvX___Montereybay__phage__JGI26117J46588_1000006_gene_45	prot_246	582	MAGTTVDIENIINPHSVAVDIADRWTSWNNSRKPKLEEWKELRNYIYATDTRTTSNSKLPWTNSTTTPKLTQIADNLHANYFSALFPQKRWFRFEAEDQESNTKAKRDVIQAYMDNKVRQSNFENTTSKILNDYIQYGNCFATIDFVKDYTTYEDGERVVNYIGPKLVRISPFDICFNPLAPDFDNSPKIVRSIMTTGEIKRKIAETVDNKYMEEIFDKMLVNRSAASGNDVDVAKSQAFIADGFSSLQEYYESEYVEVLTFYGDIYDQDTDTFHKNRIITVVDRSYILTNEQNPSWLGKSPVFHAGWRERPDNLYAMGPLDNLVGMQYRIDHLENLKADVFDQIAYPILKIRGDVEDFDFEPAARIYLGDEGDVGYLVPDSTALNADFQIQGLENKME…	1	yes	PSC-33__EnvX___Montereybay__phage__JGI26117J46588_1000006_gene_45	VOG2386	358.2	3.69e-66	Bacteria	portal protein [n=34]; hypothetical protein [n=22]; putative portal protein [n=18]; N4 gp59-like protein [n=3]; 94 kDa protein [n=2]; portal (connector) protein [n=2]; hypothetical protein ORF047 [n=1]; PfWMP4_39 [n=1]; putative structural protein [n=1]; poly(3-hydroxybutyrate) depolymerase [n=1];	VOG02597	356.3	2.37e-65	XhXpXrXs	sp|A0MZE1|PORTL_BPN4 Probable portal protein	phrog_332	251.8	9.14e-45	head-tail adaptor	connector	cluster013481	0	1201.4	9.3	1	NA	cluster01890	0	1197.7	9.4	1	NA	Pfam	PF12236	Bacteriophage head to tail connecting protein	30	142	1.8E-7	2	33	3
HQ641345.1___Vibrio__phage__ICP2	gene_19	16994	18739	1746	-1	0	HQ641345.1___Vibrio__phage__ICP2_gene_19	prot_281	582	MTGKVLELQQMLDDTRDGLAEQIANTWQNWNSQRQEWLSQKSELRNYIFATDTTTTTNSTLPWKNKTTLPKLCQIRDNLHSNYISALFPNERWLKWEGKSLQDEAKRDAIQQYMDNKVKESDFRTIMSQLLLDYIDYGNCFATVEYVKETTKDEESGATRDTYFGPRAVRIDPKDIVFNPVAVDFAHSPKIIRTVLNEGELLQMEQDQPENASLASAIARRREFRRGLGTYTREDCEKAVGFSMDGFGNLYDYFQSPYVEVLTFYGDYHDTQSGTFKRNMKVTIIDRMFVIEEKENPSWFAQAPIFHCGWRIRQDNLYAMGPLDNLVGMQYRIDHLENLKADVFDLIAFPPMKVKGDVEEFVWGPMEQIYINGDGDVEMMAPNTQALQADMQIQILEAK…	1	yes	PSC-33__HQ641345.1___Vibrio__phage__ICP2_gene_19	VOG2386	384.6	2.56e-71	Bacteria	portal protein [n=34]; hypothetical protein [n=22]; putative portal protein [n=18]; N4 gp59-like protein [n=3]; 94 kDa protein [n=2]; portal (connector) protein [n=2]; hypothetical protein ORF047 [n=1]; PfWMP4_39 [n=1]; putative structural protein [n=1]; poly(3-hydroxybutyrate) depolymerase [n=1];	VOG02597	345.3	3.3e-63	XhXpXrXs	sp|A0MZE1|PORTL_BPN4 Probable portal protein	phrog_332	246.6	9.51e-44	head-tail adaptor	connector	cluster048299	4.6e-259	864.5	7.5	1	NA	cluster01394	7.8e-258	857.8	7.4	1	NA	NA	NA	NA	NA	NA	NA	2	33	3
JQ446452.1___Salinivibrio__phage__CW02	gene_54	34253	36031	1779	-1	0	JQ446452.1___Salinivibrio__phage__CW02_gene_54	prot_387	593	MSKKLLEMEKVFDRDEISKIIANQWDTFSQQRQPKVSEWTELRNYIFATDTTTTSNSDLPWKNSTTLPKICQIRDNLHSNYVSALFPNDDWLRWEGYKQGDAQKAEKVEAYMSNKTRVSHFRTEMSKLLYDYIDYGNAFATVAFEDKRRIINGEEVTSYVGPVVKRISPLDIVFNPLASDFGSTFKIVRSVVTLGEIKKMVQDEPDNEDLASALEKRSETVRKMGAYSLEDWAKYQGFYVDGFGSIYEYYTSGYVELLEFYGDLHDPSTGEIKEDRIITIMDRSHVIRDIEAPYWFGDSPIYHVGWRFRPDNMWAMGPLDNLVGLQYRLDHLENLKADAMDLCVHPPLKIYGEVEEFEWGPSAEIHMDADGDVQELGKNAQWVVQAQQDIQLIENKMEA…	1	yes	PSC-33__JQ446452.1___Salinivibrio__phage__CW02_gene_54	VOG2386	403	6.51e-75	Bacteria	portal protein [n=34]; hypothetical protein [n=22]; putative portal protein [n=18]; N4 gp59-like protein [n=3]; 94 kDa protein [n=2]; portal (connector) protein [n=2]; hypothetical protein ORF047 [n=1]; PfWMP4_39 [n=1]; putative structural protein [n=1]; poly(3-hydroxybutyrate) depolymerase [n=1];	VOG02597	374.1	7.74e-69	XhXpXrXs	sp|A0MZE1|PORTL_BPN4 Probable portal protein	phrog_332	272.3	8.95e-49	head-tail adaptor	connector	cluster002792	2.3e-286	954.6	1.7	1	NA	cluster03515	7e-287	953.6	1.7	1	NA	Pfam	PF12236	Bacteriophage head to tail connecting protein	296	457	2.0E-7	2	33	3
JQ809650.1___Celeribacter__phage__P12053L	gene_52	32190	33980	1791	-1	0	JQ809650.1___Celeribacter__phage__P12053L_gene_52	prot_460	597	MAGTTIDIESMIDPHSLAVEISNRWSSWNNARAGKIKEWKELRNYIYATDTRTTSNNKLPWSNSTTTPKLTQIADNLHANYFAALFPQKRWFRFEAEDADSDTKIKRSIIQAYMQNKLRQSDFVNTTSKLVNDYIQYGNCFATVDFQRKITHYEDGDRIVNYIGPKLIRISPFDICFNPLAADFSDTPKIVRSVLTLGEIQRMVENDPSKEYMADIFKKMLGNRGSARGNEIDVNKSEGFVADGFASLSDYYESDYVEVLTFYGDIYDHTSGKLLNNRIITVVDRAYVLSNEENPSWLGRDPIFHVGWRDRPDNLYSMGPLDNLVGMQYRIDHLENLKADVFDQIAYPVLKIRGDVEDFDFEPNARIYLGDEGDVGYLVPDSTALNADFQIQNIEAKME…	1	yes	PSC-33__JQ809650.1___Celeribacter__phage__P12053L_gene_52	VOG2386	384.2	3.07e-71	Bacteria	portal protein [n=34]; hypothetical protein [n=22]; putative portal protein [n=18]; N4 gp59-like protein [n=3]; 94 kDa protein [n=2]; portal (connector) protein [n=2]; hypothetical protein ORF047 [n=1]; PfWMP4_39 [n=1]; putative structural protein [n=1]; poly(3-hydroxybutyrate) depolymerase [n=1];	VOG02597	368.5	9.68e-68	XhXpXrXs	sp|A0MZE1|PORTL_BPN4 Probable portal protein	phrog_332	260.6	1.76e-46	head-tail adaptor	connector	cluster029242	0	1307.3	4	1	NA	cluster01890	0	1177.3	5.7	1	NA	Pfam	PF12236	Bacteriophage head to tail connecting protein	31	145	6.9E-7	2	33	3
KC751414.1___Pseudoalteromonas__phage__RIO_1	gene_52	36918	38618	1701	-1	0	KC751414.1___Pseudoalteromonas__phage__RIO_1_gene_52	prot_516	567	MSLTLQSTKPDVIASRISEQWSSFQSKRSLNRGKWEEIESYLYATDTTSLNTSGSYDHTTHIPVVAEIKEELESLIYSTVYPNEDFMGWKPYDLQAGTKDKREKVLAYIKNRHSLNGFEKVLRKLVQDLVTYGNAFVHVTHTNSGRDGYRGPVPKRISPYDIVFDPAATDFANTTKIVRSVMTLGDFKKFADKVGLDDSKTKEILQRRYQGNIGSSIDTNKNKQFLPDGFTSLQSYYDSGVIELLWLYGDVWDDETEELHTDQCVVIADRTTLVMQEESDGHIHKASWAEKPDNLWSQGPLDKVIGMNYQINHRENSKSDALDRFIFPDRVYIGDVEEIYDTSTGQTKYLAPEGGGVRDIVPDTTVLTADMHQDKLMALSREAAGLPPQLQGYRTPGEK…	1	yes	PSC-33__KC751414.1___Pseudoalteromonas__phage__RIO_1_gene_52	VOG2386	272.3	2.2e-49	Bacteria	portal protein [n=34]; hypothetical protein [n=22]; putative portal protein [n=18]; N4 gp59-like protein [n=3]; 94 kDa protein [n=2]; portal (connector) protein [n=2]; hypothetical protein ORF047 [n=1]; PfWMP4_39 [n=1]; putative structural protein [n=1]; poly(3-hydroxybutyrate) depolymerase [n=1];	VOG02597	253.9	2.38e-45	XhXpXrXs	sp|A0MZE1|PORTL_BPN4 Probable portal protein	phrog_332	200.5	9.94e-35	head-tail adaptor	connector	cluster020052	2.1e-277	925.2	1.3	1	NA	cluster07215	8.3e-299	993.2	1	1	NA	NA	NA	NA	NA	NA	NA	2	33	3
KF302037.1___Pseudoalteromonas__phage__HP1	gene_25	20487	22187	1701	-1	0	KF302037.1___Pseudoalteromonas__phage__HP1_gene_25	prot_546	567	MSLTLQSTKPDVIASRISEQWFSFQSKRSLNRGKWEEIESYLYATDTTSLNTSGSYDHTTHIPVVAEIKEELESLIYSTVYPNEDFMGWKPYDLQAGTKDKREKVLAYIKNRHSLNGFEKVLRKLVQDLVTYGNAFVHVTHTNSGRDGYRGPVPKRISPYDIVFDPAATEFNNTTKIVRSVMTLGDFKKFADKVGLDESKTKEILQRRYQGQIGSFIDTNKNKQFLPDGFTSLQSYYDSGVIELLWLYGDVWDDETEELHVDQCVVIADRTTLVMQEEADGHIHKASWAEKPDNLWSQGPLDKVIGMNYQINHRENSKSDALDRFIFPDRVYIGDVEEIYDTSTGQTKYLAPEGGGVRDIVPDTTVLTADMHQDKLMALSREAAGLPPQLQGYRTPGEK…	1	yes	PSC-33__KF302037.1___Pseudoalteromonas__phage__HP1_gene_25	VOG2386	266.7	2.82e-48	Bacteria	portal protein [n=34]; hypothetical protein [n=22]; putative portal protein [n=18]; N4 gp59-like protein [n=3]; 94 kDa protein [n=2]; portal (connector) protein [n=2]; hypothetical protein ORF047 [n=1]; PfWMP4_39 [n=1]; putative structural protein [n=1]; poly(3-hydroxybutyrate) depolymerase [n=1];	VOG02597	250.8	9.57e-45	XhXpXrXs	sp|A0MZE1|PORTL_BPN4 Probable portal protein	phrog_332	197.1	4.51e-34	head-tail adaptor	connector	cluster020052	5.4e-278	927.1	1.6	1	NA	cluster07215	1.4e-300	999	1.3	1	NA	NA	NA	NA	NA	NA	NA	2	33	3
KP774835.2___Citrobacter__phage__CVT22	gene_4	4351	6102	1752	1	0	KP774835.2___Citrobacter__phage__CVT22_gene_4	prot_584	584	MSSKVADIGVTFQPDNPSQWIINLWDKYHQQRRGKVDEWKELRNYIFATDTTTTTNASLPWKNSTTIPKICQIRDNLHSNYVSALFPNDDWMQWVAYSQDDAKKSKADAIKAYLSNKTREGHFSAELSKLLYDYIDYGNAFATVTYESNSHEVDGEIIPEYIGPRVYRISPMDIVFNPLAATFKESFKIIRSVRTLGDLAKLAKTDPSQAFWEEAVKRRQDMRIQCGGYSVEDFDKYEGFQADGFGNMYDYYMSDYVEILEFYGDWYDAEKNELHENTHMVVVDRMKMIHEEPIKNWFGSAPLYHVGWRFRTDNLWAMGPLDNLVGMQYRMDHLENLKADAMDLCVHPPLLIQGDVEEFEWGPGVEIHVDESGSVSELGKNLNSIMQANNEIQMLEQRM…	1	yes	PSC-33__KP774835.2___Citrobacter__phage__CVT22_gene_4	VOG2386	399.1	3.65e-74	Bacteria	portal protein [n=34]; hypothetical protein [n=22]; putative portal protein [n=18]; N4 gp59-like protein [n=3]; 94 kDa protein [n=2]; portal (connector) protein [n=2]; hypothetical protein ORF047 [n=1]; PfWMP4_39 [n=1]; putative structural protein [n=1]; poly(3-hydroxybutyrate) depolymerase [n=1];	VOG02597	355.5	3.33e-65	XhXpXrXs	sp|A0MZE1|PORTL_BPN4 Probable portal protein	phrog_332	264.2	3.56e-47	head-tail adaptor	connector	cluster002792	4.9e-299	996.4	4.8	1	NA	cluster03515	4.6e-296	983.9	4.7	1	NA	Pfam	PF12236	Bacteriophage head to tail connecting protein	298	460	1.3E-8	2	33	3
MF431615.1___Lentibacter__virus__vB_LenP_ICBM3	gene_11	7328	9121	1794	1	0	MF431615.1___Lentibacter__virus__vB_LenP_ICBM3_gene_11	prot_673	598	MAGTTIDIESMIDPHSLAVEISNRWSSWNNARAGKIKEWKELRNYIYATDTRTTSNNKLPWSNSTTTPKLTQIADNLHANYFAALFPQKRWFRFEAEDADSDTKIKRSIIQAYMQNKLRQSDFVNTTSKLVNDYIQYGNCFATVDFQRKITHYEDGDRIVNYVGPKLIRISPFDICFNPLASDFSDTPKVVRSVLTLGEIQRMVESDPSKEYMADIFNKMLGNRGAAKGNEIDVNKSEGFVADGFASLTDYYESDYVEVLTFYGDIYDHTSGKLLNNRIITVVDRAYVLSNEENPSWLGRDPIFHVGWRDRPDNLYSMGPLDNLVGMQYRIDHLENLKADVFDQIAYPVLKIRGDVEDFDFQPNARIYLGDEGDVGYLVPDSTALNADFQIQNIEAKME…	1	yes	PSC-33__MF431615.1___Lentibacter__virus__vB_LenP_ICBM3_gene_11	VOG2386	378.7	3.64e-70	Bacteria	portal protein [n=34]; hypothetical protein [n=22]; putative portal protein [n=18]; N4 gp59-like protein [n=3]; 94 kDa protein [n=2]; portal (connector) protein [n=2]; hypothetical protein ORF047 [n=1]; PfWMP4_39 [n=1]; putative structural protein [n=1]; poly(3-hydroxybutyrate) depolymerase [n=1];	VOG02597	370.2	4.56e-68	XhXpXrXs	sp|A0MZE1|PORTL_BPN4 Probable portal protein	phrog_332	259.1	3.5e-46	head-tail adaptor	connector	cluster029242	0	1312.6	4.3	1	NA	cluster01890	0	1175.4	6.1	1	NA	Pfam	PF12236	Bacteriophage head to tail connecting protein	31	145	6.7E-7	2	33	3
MF431616.1___Lentibacter__virus__vB_LenP_ICBM2	gene_46	30708	32453	1746	-1	0	MF431616.1___Lentibacter__virus__vB_LenP_ICBM2_gene_46	prot_767	582	MAGTTVDLENIINPHGLAVDIADRFNTWNHARSNKIEEWKELRNYLYATDTRTTSNSKLPWTNSTTTPKLTQIADNLHANYFAALFPQKRWFRFEATDQDSNTKNKRDAIQSYMLNKVRQSDFENTASKLINDYIQYGNCFATVEFVKDYTEFEDGERIVSYVGPRVVRLSPYDVCFNPLAPSFAESPKIVRSVLSLGEIARKIESSSENSYMSEIMEKMVSNRAAMGGNEVDENKTQGFIADGFTSVKEYYESNYVELLTFYGDIYDKESGSFLKNRVITVVDRAYVLSNEQNPSWLGTTPIHHAGWRERPDNLYAMGPLDNLVGMQYRIDHLENLKADVFDQIAYPMIKIRGDVEDFEFAPASRIYMGEEGDVGYLSPDTTALNADFQIQNLENKME…	1	yes	PSC-33__MF431616.1___Lentibacter__virus__vB_LenP_ICBM2_gene_46	VOG2386	340.4	1.09e-62	Bacteria	portal protein [n=34]; hypothetical protein [n=22]; putative portal protein [n=18]; N4 gp59-like protein [n=3]; 94 kDa protein [n=2]; portal (connector) protein [n=2]; hypothetical protein ORF047 [n=1]; PfWMP4_39 [n=1]; putative structural protein [n=1]; poly(3-hydroxybutyrate) depolymerase [n=1];	VOG02597	360.2	4.03e-66	XhXpXrXs	sp|A0MZE1|PORTL_BPN4 Probable portal protein	phrog_332	245.3	1.73e-43	head-tail adaptor	connector	cluster013481	0	1150.5	5	1	NA	cluster01890	0	1153.8	5	1	NA	Pfam	PF12236	Bacteriophage head to tail connecting protein	31	145	1.6E-6	2	33	3
MF431617.1___Lentibacter__virus__vB_LenP_ICBM1	gene_48	31389	33182	1794	-1	0	MF431617.1___Lentibacter__virus__vB_LenP_ICBM1_gene_48	prot_824	598	MAGTTIDIESMIDPHSLAVEISNRWSSWNNARAGKIKEWKELRNYIYATDTRTTSNNKLPWSNSTTTPKLTQIADNLHANYFAALFPQKRWFRFEAEDADSDTKIKRSIIQAYMQNKLRQSDFVNTTSKLVNDYIQYGNCFATVDFQRKITHYEDGDRIVNYVGPKLIRISPFDICFNPLASDFSDTPKVVRSVLTLGEIQRMVESDPSKEYMADIFNKMLGNRGAAKGNEIDVNKSEGFVADGFASLTDYYESDYVEVLTFYGDIYDHTSGKLLNNRIITVVDRAYVLSNEENPSWLGRDPIFHVGWRDRPDNLYSMGPLDNLVGMQYRIDHLENLKADVFDQIAYPVLKIRGDVEDFDFQPNARIYLGDEGDVGYLVPDSTALNADFQIQNIEAKME…	1	yes	PSC-33__MF431617.1___Lentibacter__virus__vB_LenP_ICBM1_gene_48	VOG2386	378.7	3.64e-70	Bacteria	portal protein [n=34]; hypothetical protein [n=22]; putative portal protein [n=18]; N4 gp59-like protein [n=3]; 94 kDa protein [n=2]; portal (connector) protein [n=2]; hypothetical protein ORF047 [n=1]; PfWMP4_39 [n=1]; putative structural protein [n=1]; poly(3-hydroxybutyrate) depolymerase [n=1];	VOG02597	370.2	4.56e-68	XhXpXrXs	sp|A0MZE1|PORTL_BPN4 Probable portal protein	phrog_332	259.1	3.5e-46	head-tail adaptor	connector	cluster029242	0	1312.6	4.3	1	NA	cluster01890	0	1175.4	6.1	1	NA	Pfam	PF12236	Bacteriophage head to tail connecting protein	31	145	6.7E-7	2	33	3
AF189021.1___Roseophage__SIO1	gene_55	37564	38505	942	-1	0	AF189021.1___Roseophage__SIO1_gene_55	prot_055	314	MAGNTVATLALAKRAEVWSAELKEILRDELQGMKYVKWLDQFPDGDTFKIPSLGDATINNYSEDTAVTYDPIDDAQFTFSITEYLQAGNYITNKAMQDVYYANEIMSQFVPIQERALMERLESDIMALGGQQTVDNANTINGVDHRMLGSGTGGKIGVADFAKANLALKTAKVPQKNLVAIVDPSVEFELNTLSQLTNVSNNPRWEGVVRDGIATGMSFIANIYGFDVYTSNYLKTEAAETIGGTTVNNAITNMFFSADQAVLPFVGAWRQMPEVDTEYNKDFQRTEFVTTARYGLKLYRPENLATVMTAPLA	1	yes	PSC-69__AF189021.1___Roseophage__SIO1_gene_55	VOG4572	79	1.35e-11	Bacteria	major capsid protein [n=107]; capsid protein [n=35]; hypothetical protein [n=28]; putative major capsid protein [n=21]; gp6 [n=19]; putative capsid protein [n=18]; capsid and scaffold protein [n=11]; coat protein [n=10]; minor capsid protein [n=7]; major capsid-like protein [n=7]; gp8 [n=4]; P22 coat protein [n=4]; predicted major capsid protein [n=3]; main capsid protein [n=3]; major capsid prot…	VOG00395	43.8	0.000283	XrXs	sp|P19727|CAPSB_BPT7 Minor capsid protein	phrog_267	90.5	3.12e-13	major head protein	head and packaging	cluster020009	8.8e-200	665.9	4.9	1	NA	cluster05399	1.1e-199	663	5	1	NA	NA	NA	NA	NA	NA	NA	3	69	2
AY095314.2___Vibriophage__VpV262	gene_63	37299	38267	969	-1	0	AY095314.2___Vibriophage__VpV262_gene_63	prot_121	323	MSTGNNTSNTQALIVSEIWADEIEDILHEKLLDVNIARVVDFPDGDKLTIPSVGTPVVRSRPEQGDFTFDNLDTGEISIILRDEVYAGNAISKKLRQDSRWISNVGAMLPAEQARAIMERYQTDLLALGNAQFAGQNDPNVINGVPHRFVGTGTDQTMDVTDFSRVNYVMTQSKMPMGGMIGIIDPSVAHHLETITNISNISNNPRWEGIVESGIAPDMQFVRSVYGIDLFVSNLLADANETINAGGDARSTTAGKCNMFMNVSDMGLLPFVVAWKEMPTTKSFIDDYNDDLNTATTARWGNGLVRDENLVCVLANADKVTF	1	yes	PSC-69__AY095314.2___Vibriophage__VpV262_gene_63	VOG4572	58.1	1.61e-07	Bacteria	major capsid protein [n=107]; capsid protein [n=35]; hypothetical protein [n=28]; putative major capsid protein [n=21]; gp6 [n=19]; putative capsid protein [n=18]; capsid and scaffold protein [n=11]; coat protein [n=10]; minor capsid protein [n=7]; major capsid-like protein [n=7]; gp8 [n=4]; P22 coat protein [n=4]; predicted major capsid protein [n=3]; main capsid protein [n=3]; major capsid prot…	no_hit	no_hit	no_hit	no_hit	no_hit	phrog_267	69.1	4.74e-09	major head protein	head and packaging	cluster001472	2.8e-99	335.7	0.2	1	NA	cluster00812	6.5e-100	335.1	0.1	1	NA	NA	NA	NA	NA	NA	NA	3	69	2
DQ163915.1___Bacteriophage__PA11	gene_45	34094	35035	942	-1	0	DQ163915.1___Bacteriophage__PA11_gene_45	prot_176	314	MQLTSNTRAFIESEQYSKFILLNLHDGLLPETFYRNVSDFGSGETLHIKTIGSVTLQEAEEDTPLIYNPIETGEITFQITEYKGDAWYVTDDLREDGTDIDRLMAERAAESTRAIQETFETDFLKTGAEYFAANPGPHNVNGFPHVIVSAETNGVFALKHLIAMRLAFDKANVPAEGRVFIVDPVAEATLNGLVTITHDVTDFGKMILESGMARGQRFIMNLYGWDILTSNRLHVANYNDGTTTGNGYVGNLFMCILDDQTKPIMGAWRRMPKSEGERNKDRARDEHVVRCRYGFGIQRLDTLGLLATSATAY	1	yes	PSC-69__DQ163915.1___Bacteriophage__PA11_gene_45	VOG4572	96.4	5.35e-15	Bacteria	major capsid protein [n=107]; capsid protein [n=35]; hypothetical protein [n=28]; putative major capsid protein [n=21]; gp6 [n=19]; putative capsid protein [n=18]; capsid and scaffold protein [n=11]; coat protein [n=10]; minor capsid protein [n=7]; major capsid-like protein [n=7]; gp8 [n=4]; P22 coat protein [n=4]; predicted major capsid protein [n=3]; main capsid protein [n=3]; major capsid prot…	no_hit	no_hit	no_hit	no_hit	no_hit	phrog_267	97	1.67e-14	major head protein	head and packaging	cluster020467	1.1e-174	583.6	0.1	1	NA	cluster01482	1.7e-156	521.3	0	1	NA	NA	NA	NA	NA	NA	NA	3	69	2
EnvX___Montereybay__phage__JGI26117J46588_1000006	gene_42	27355	28329	975	-1	0	EnvX___Montereybay__phage__JGI26117J46588_1000006_gene_42	prot_243	325	MAGMISSNADTQRLIRAEVYSSELKDILRDEMQAQKYVRMLDGFPDGDSFTIPTIGKTVTANYTEDTQVAYTPMDTAEFAFTVDQYLQSASYLTKKAAQDSFYSAQLEARFVPEQERAIMEHFESTTFSAPEVGVSANSAETLDGVAHRISGGNAGRLELADFAFARYALKKSNVADRGMVAIVDPSAEYMLNTLTNITNVSNNPKFEGIVSAGVATGMRFVANVYGFDVYTSNYLKSTVADAALVEKDGSTANDFSSNNGVANLFFSADPTSNPFVGAWRQMPEVDYEYNKDFQRHEYVTTARYGVKKYRPEGIVTVVTNPDV	1	yes	PSC-69__EnvX___Montereybay__phage__JGI26117J46588_1000006_gene_42	VOG4572	74.4	1.06e-10	Bacteria	major capsid protein [n=107]; capsid protein [n=35]; hypothetical protein [n=28]; putative major capsid protein [n=21]; gp6 [n=19]; putative capsid protein [n=18]; capsid and scaffold protein [n=11]; coat protein [n=10]; minor capsid protein [n=7]; major capsid-like protein [n=7]; gp8 [n=4]; P22 coat protein [n=4]; predicted major capsid protein [n=3]; main capsid protein [n=3]; major capsid prot…	VOG00395	40.3	0.00134	XrXs	sp|P19727|CAPSB_BPT7 Minor capsid protein	phrog_267	82.7	1.05e-11	major head protein	head and packaging	cluster031003	8.7e-208	692.5	9	1	NA	cluster08612	1e-215	716	9.9	1	NA	NA	NA	NA	NA	NA	NA	3	69	2
HQ641345.1___Vibrio__phage__ICP2	gene_16	14950	15921	972	-1	0	HQ641345.1___Vibrio__phage__ICP2_gene_16	prot_278	324	MSGATGSQNTGNSRHFIEAQQYSKFILENLHDGFLPAMMYRNVSDFPAGEVLNIKTVGTVTIQDVEEETPLIYNPIETGNVQMRITDYKGDAWSVTDKLRQDGAQIETLMAMRAQESTRAMQEDFETRYLQVAYEGLTAADANEINGFAHKRIATGTNKTIELEDLIYLKLAADKANVPLGGRILIVDPIVEATLNTKFQITASAIDSNPFFMDVFKGGFARDHKFITNLYGWNIITSNRLPRIVSEQVGGVTITNGVACIGMCVADDNCKPVMYAERQAPRVESERNKDLARDEFVARRRYGLGIQRKDTLFALLASETAYK	1	yes	PSC-69__HQ641345.1___Vibrio__phage__ICP2_gene_16	VOG4572	77.4	2.69e-11	Bacteria	major capsid protein [n=107]; capsid protein [n=35]; hypothetical protein [n=28]; putative major capsid protein [n=21]; gp6 [n=19]; putative capsid protein [n=18]; capsid and scaffold protein [n=11]; coat protein [n=10]; minor capsid protein [n=7]; major capsid-like protein [n=7]; gp8 [n=4]; P22 coat protein [n=4]; predicted major capsid protein [n=3]; main capsid protein [n=3]; major capsid prot…	no_hit	no_hit	no_hit	no_hit	no_hit	phrog_267	80.1	3.38e-11	major head protein	head and packaging	cluster035082	4.3e-143	480.1	0.5	1	NA	cluster01482	3.5e-144	480.9	0.6	1	NA	NA	NA	NA	NA	NA	NA	3	69	2
JQ446452.1___Salinivibrio__phage__CW02	gene_51	32127	33065	939	-1	0	JQ446452.1___Salinivibrio__phage__CW02_gene_51	prot_384	313	MQLTTNTRAFIEAEQYSSFILTNMHDGLLPQTFYRDVSDFGSGTTLHIKTIGDVSIQDAAEDVALEYSPIDTGEVTLQITDYVGDAWFIVDDLREDGAQVEQLAAARSAESTRALQERFESRYLEVCEAAQTDADPNKVNGFAHRIASADTNGKLELSDLIKMKLAFDKAEVPMAGRVAIMDPICAAHLDQQVSITNDVTPFAEQILQNGFDREHEFLMNLYGWNIMTSNRLAKGTFSDGTTSISDGVANVFMCVADDNTKPIMAAWRRMPSVEGERNKDLRRDEFVTTSRYGFGPQRKDTLGIYITTAVNI	1	yes	PSC-69__JQ446452.1___Salinivibrio__phage__CW02_gene_51	VOG4572	88.6	1.77e-13	Bacteria	major capsid protein [n=107]; capsid protein [n=35]; hypothetical protein [n=28]; putative major capsid protein [n=21]; gp6 [n=19]; putative capsid protein [n=18]; capsid and scaffold protein [n=11]; coat protein [n=10]; minor capsid protein [n=7]; major capsid-like protein [n=7]; gp8 [n=4]; P22 coat protein [n=4]; predicted major capsid protein [n=3]; main capsid protein [n=3]; major capsid prot…	no_hit	no_hit	no_hit	no_hit	no_hit	phrog_267	89.9	4.07e-13	major head protein	head and packaging	cluster026516	1.3e-168	563.9	1.7	1	NA	cluster01482	1.3e-169	564.4	1.5	1	NA	NA	NA	NA	NA	NA	NA	3	69	2
JQ809650.1___Celeribacter__phage__P12053L	gene_49	30224	31165	942	-1	0	JQ809650.1___Celeribacter__phage__P12053L_gene_49	prot_457	314	MAGNTVATLDLAKRAEVWGAELKEILRDELQGMKYVNWLDSFPDGDTFKIPSIGDATLNDYSEDTAVTYDPIDDSQFTFSITEYLQSGNYITNKAMQDVYYANEIMSQFVPLQERALMERVETDIMALGGQQTLDNGNAINGVDHRMLGSGTGNKIGVEDFAKALRALKTGKVPQKNLVAIVDPSVEYELNTLSQLTNVSNNPRWEGVVRDGIATGMSFVANIYGFDVYTSNYLKTEAAETIGGTTVNNAITNMFFSADQTVLPFVGAWRQMPKVDTEYNKDFQRTEFVTTARYGLKLFRPENLATVLTAPMV	1	yes	PSC-69__JQ809650.1___Celeribacter__phage__P12053L_gene_49	VOG4572	87.1	3.44e-13	Bacteria	major capsid protein [n=107]; capsid protein [n=35]; hypothetical protein [n=28]; putative major capsid protein [n=21]; gp6 [n=19]; putative capsid protein [n=18]; capsid and scaffold protein [n=11]; coat protein [n=10]; minor capsid protein [n=7]; major capsid-like protein [n=7]; gp8 [n=4]; P22 coat protein [n=4]; predicted major capsid protein [n=3]; main capsid protein [n=3]; major capsid prot…	VOG00395	47.9	4.47e-05	XrXs	sp|P19727|CAPSB_BPT7 Minor capsid protein	phrog_267	91.7	1.81e-13	major head protein	head and packaging	cluster020009	1.3e-198	662.1	3.3	1	NA	cluster05399	4.4e-199	661	3.4	1	NA	NA	NA	NA	NA	NA	NA	3	69	2
KC751414.1___Pseudoalteromonas__phage__RIO_1	gene_49	34836	35792	957	-1	0	KC751414.1___Pseudoalteromonas__phage__RIO_1_gene_49	prot_513	319	MQTTGNTQAMVIQQLYSTSLIESFPQQLMDASMFFNDRTSEFPEGEVLNIDQIGDITLSPYAENSPLDFSAIDTSRIELRISDYDQDAWYITDKLREDGASKIPGLVSSRLRKSTQAFMTKMVSDVMATQSQQTAGDLNLINAQPHRFVASGGTNGARKITLDDIRQLKLSFDEANIPANGRILIVDPTVEFELNGLAQVVTSDNPRFEGLIETGFADRTGMQFYRNIYGFDIMISTTLPRVGAETIDGKSTGANGVANMALYVGDDEGKPFMGVVRKSPTAGNKRNDDLQRDEHWALSRWGFALQRPETLAVVLTDK	1	yes	PSC-69__KC751414.1___Pseudoalteromonas__phage__RIO_1_gene_49	VOG4572	75.4	6.78e-11	Bacteria	major capsid protein [n=107]; capsid protein [n=35]; hypothetical protein [n=28]; putative major capsid protein [n=21]; gp6 [n=19]; putative capsid protein [n=18]; capsid and scaffold protein [n=11]; coat protein [n=10]; minor capsid protein [n=7]; major capsid-like protein [n=7]; gp8 [n=4]; P22 coat protein [n=4]; predicted major capsid protein [n=3]; main capsid protein [n=3]; major capsid prot…	VOG00395	36.8	0.00655	XrXs	sp|P19727|CAPSB_BPT7 Minor capsid protein	phrog_267	80.8	2.46e-11	major head protein	head and packaging	cluster169225	1.8e-221	737.2	1.4	1	'No Annotation Found'=2; 'Major capsid protein '=1; 'Minor capsid protein'=1;	cluster25804	2.8e-222	737.2	1.4	1	'No Annotation Found'=4; 'Major capsid protein '=2; 'Minor capsid protein'=2;	NA	NA	NA	NA	NA	NA	3	69	2
KF302037.1___Pseudoalteromonas__phage__HP1	gene_22	18397	19353	957	-1	0	KF302037.1___Pseudoalteromonas__phage__HP1_gene_22	prot_543	319	MQTTGNTQAMVIQQLYSTSLIESFPQQLMDASMFFNDRTSEFPEGEVLNIDQIGDITLSPYAENSPLDFSAIDTSRIELRISDYDQDAWYITDKLREDGASKIPGLVSSRLRKSTQAFMTKMVSDVMATQSQQTAGDLNLINAQPHRFVASGGTDGSRKITLDDIRQLKLSFDEANIPAAGRILIVDPTVEFELNGLAQVVTSDNPRFEGLIETGFADRTGMQFYRNIYGFDIMISTTLPRVGAETIDGKSTGATGVANMALYVGDDEGKPFMGVVRKQPTAGNKRNDDLQRDEHWALSRWGFALQRPETLAVVLTDK	1	yes	PSC-69__KF302037.1___Pseudoalteromonas__phage__HP1_gene_22	VOG4572	77	3.25e-11	Bacteria	major capsid protein [n=107]; capsid protein [n=35]; hypothetical protein [n=28]; putative major capsid protein [n=21]; gp6 [n=19]; putative capsid protein [n=18]; capsid and scaffold protein [n=11]; coat protein [n=10]; minor capsid protein [n=7]; major capsid-like protein [n=7]; gp8 [n=4]; P22 coat protein [n=4]; predicted major capsid protein [n=3]; main capsid protein [n=3]; major capsid prot…	VOG00395	37.4	0.00496	XrXs	sp|P19727|CAPSB_BPT7 Minor capsid protein	phrog_267	81.6	1.73e-11	major head protein	head and packaging	cluster169225	5.6e-225	748.7	1.6	1	'No Annotation Found'=2; 'Major capsid protein '=1; 'Minor capsid protein'=1;	cluster25804	8.8e-226	748.7	1.6	1	'No Annotation Found'=4; 'Major capsid protein '=2; 'Minor capsid protein'=2;	NA	NA	NA	NA	NA	NA	3	69	2
KP774835.2___Citrobacter__phage__CVT22	gene_7	7278	8216	939	1	0	KP774835.2___Citrobacter__phage__CVT22_gene_7	prot_587	313	MQTTANSQAFIESEVVSNFILHNLHDGLLGEQFYRNVSDFGNGTTLNIKTVGSVTIQDAQEDTPLVYNPIETGTVTLQITTQEGDAWYITDDLREDGNQVDALISARAMEGTRAIQESFETKFLATANAAQTNANANVINGFAHRIASAETNNVFALDQLIRTRLAFDKANVPAQGRVFICDPVVEATLNGLVTITHDVTPFGAEILQKGLASGMRFIMTLFGFDIILSNRLATGSFSDGTTTVANGVANVAMCVLDDQTKPIMVAWRRQPKTESERNKDLARDEFVTRCRYGMGPQRLDTLAIIITSAVNI	1	yes	PSC-69__KP774835.2___Citrobacter__phage__CVT22_gene_7	VOG4572	85.7	6.68e-13	Bacteria	major capsid protein [n=107]; capsid protein [n=35]; hypothetical protein [n=28]; putative major capsid protein [n=21]; gp6 [n=19]; putative capsid protein [n=18]; capsid and scaffold protein [n=11]; coat protein [n=10]; minor capsid protein [n=7]; major capsid-like protein [n=7]; gp8 [n=4]; P22 coat protein [n=4]; predicted major capsid protein [n=3]; main capsid protein [n=3]; major capsid prot…	VOG00395	38.6	0.00288	XrXs	sp|P19727|CAPSB_BPT7 Minor capsid protein	phrog_267	86.5	1.91e-12	major head protein	head and packaging	cluster020467	2.6e-168	562.6	5.9	1	NA	cluster01482	1.9e-157	524.4	5	1	NA	NA	NA	NA	NA	NA	NA	3	69	2
MF431615.1___Lentibacter__virus__vB_LenP_ICBM3	gene_14	10143	11084	942	1	0	MF431615.1___Lentibacter__virus__vB_LenP_ICBM3_gene_14	prot_676	314	MAGNTVATLDLAKRAEVWGAELKEILRDELQGMKYVNWLDSFPDGDTFKIPSIGDATLNNYSEDTAVTYDPIDDSQFTFSITEYLQSGNYITNKAMQDVYYANEIMSQFVPLQERALMERVETDIMALGGQQTLDNGNAINGVDHRMLGSGTGNKIGVEDFAKALRALKTGKVPQKNLVAIVDPSVEYELNTLSQLTNVSNNPRWEGVVRDGIATGMSFVANIYGFDVYTSNYLKTEAAETIGGTTVNNAITNMFFSADQTVLPFVGAWRQMPKVDTEYNKDFQRTEFVTTARYGLKLFRPENLATVLTAPMV	1	yes	PSC-69__MF431615.1___Lentibacter__virus__vB_LenP_ICBM3_gene_14	VOG4572	87.1	3.51e-13	Bacteria	major capsid protein [n=107]; capsid protein [n=35]; hypothetical protein [n=28]; putative major capsid protein [n=21]; gp6 [n=19]; putative capsid protein [n=18]; capsid and scaffold protein [n=11]; coat protein [n=10]; minor capsid protein [n=7]; major capsid-like protein [n=7]; gp8 [n=4]; P22 coat protein [n=4]; predicted major capsid protein [n=3]; main capsid protein [n=3]; major capsid prot…	VOG00395	46.9	6.96e-05	XrXs	sp|P19727|CAPSB_BPT7 Minor capsid protein	phrog_267	91.6	1.91e-13	major head protein	head and packaging	cluster020009	1.9e-198	661.5	3.5	1	NA	cluster05399	5.4e-199	660.7	3.6	1	NA	NA	NA	NA	NA	NA	NA	3	69	2
MF431616.1___Lentibacter__virus__vB_LenP_ICBM2	gene_43	28662	29636	975	-1	0	MF431616.1___Lentibacter__virus__vB_LenP_ICBM2_gene_43	prot_764	325	MAGMISSNADTQRLIRSEVYSSELKDILRDEMQAQRYVRMLDGFPDGDTFTIPTIGKTTVADYTEDAAVAYTPMDTAEFQFTVDKYLQSASYITKKAAQDSFYSAQLEARFVPEQERAIMEHFEATTFASPEVGVTANSAETLDGVAHRMSGGNGGRLELADFAFARYALKKSNVPDRNLVAVVDPSVEYQLNTLTNLVNVSNNPMWEGIVRDGIATGMRFVANVYGFDVYTSNYLKADVADSALLEKDGATGNDFSVNAGVANLFFSADATANPFVGAWRQMPEVDYEYNKDYQRHEYVTTARYGVKKYRPEGIVTVVTNPDV	1	yes	PSC-69__MF431616.1___Lentibacter__virus__vB_LenP_ICBM2_gene_43	VOG4572	82.6	2.6e-12	Bacteria	major capsid protein [n=107]; capsid protein [n=35]; hypothetical protein [n=28]; putative major capsid protein [n=21]; gp6 [n=19]; putative capsid protein [n=18]; capsid and scaffold protein [n=11]; coat protein [n=10]; minor capsid protein [n=7]; major capsid-like protein [n=7]; gp8 [n=4]; P22 coat protein [n=4]; predicted major capsid protein [n=3]; main capsid protein [n=3]; major capsid prot…	VOG00395	48.9	2.83e-05	XrXs	sp|P19727|CAPSB_BPT7 Minor capsid protein	phrog_267	92.4	1.28e-13	major head protein	head and packaging	cluster031003	9.7e-211	702.2	7.2	1	NA	cluster08612	1.4e-216	718.8	8.4	1	NA	NA	NA	NA	NA	NA	NA	3	69	2
MF431617.1___Lentibacter__virus__vB_LenP_ICBM1	gene_45	29426	30367	942	-1	0	MF431617.1___Lentibacter__virus__vB_LenP_ICBM1_gene_45	prot_821	314	MAGNTVATLDLAKRAEVWGAELKEILRDELQGMKYVNWLDSFPDGDTFKIPSIGDATLNNYSEDTAVTYDPIDDSQFTFSITEYLQSGNYITNKAMQDVYYANEIMSQFVPLQERALMERVETDIMALGGQQTLDNGNAINGVDHRMLGSGTGNKIGVEDFAKALRALKTGKVPQKNLVAIVDPSVEYELNTLSQLTNVSNNPRWEGVVRDGIATGMSFVANIYGFDVYTSNYLKTEAAETIGGTTVNNAITNMFFSADQTVLPFVGAWRQMPKVDTEYNKDFQRTEFVTTARYGLKLFRPENLATVLTAPMV	1	yes	PSC-69__MF431617.1___Lentibacter__virus__vB_LenP_ICBM1_gene_45	VOG4572	87.1	3.51e-13	Bacteria	major capsid protein [n=107]; capsid protein [n=35]; hypothetical protein [n=28]; putative major capsid protein [n=21]; gp6 [n=19]; putative capsid protein [n=18]; capsid and scaffold protein [n=11]; coat protein [n=10]; minor capsid protein [n=7]; major capsid-like protein [n=7]; gp8 [n=4]; P22 coat protein [n=4]; predicted major capsid protein [n=3]; main capsid protein [n=3]; major capsid prot…	VOG00395	46.9	6.96e-05	XrXs	sp|P19727|CAPSB_BPT7 Minor capsid protein	phrog_267	91.6	1.91e-13	major head protein	head and packaging	cluster020009	1.9e-198	661.5	3.5	1	NA	cluster05399	5.4e-199	660.7	3.6	1	NA	NA	NA	NA	NA	NA	NA	3	69	2
[truncated: 1 more columns]
