# Supplementary material for: VirClust—A Tool for Hierarchical Clustering, Core Protein Detection and Annotation of (Prokaryotic) Viruses
Source: Viruses. 2023 Apr 19;15(4):1007. doi: 10.3390/v15041007 (PMC10143988; doi:10.3390/v15041007)
Supplement: Supplementary file 1 [file viruses-15-01007-s001.zip › SI_File10_corePSCs.xlsx]

## Sheet: annots_Morph_core_per_VGC
Domain	VGC	Family	total_core_PSCs	number_hp	genome length range	gene count range	phage_numbers	sim_min	MCP	TerL	Por	DNApol		all_annots	min_genome_length	max_genome_length		min_genome_length	max_genome_length		min_gene_count	max_gene_count
Duplodnaviria	1	Peduoviridae	7	0	28,8 - 40,6	37 - 56	59	16	+	+	+	-		terminase large subunit ; head-tail adaptor Ad1 ; tail completion Tc1 ; neck protein Ne1 ; portal protein ; terminase small subunit ; major head protein	28765	40555		28.8	40.6		37	56
Duplodnaviria	3	Autographiviridae	9	0	30,8 - 47,7	29 - 65	106	17	+	+	-	+		DNA polymerase ___ DNA polymerase I ; exonuclease ; endolysin ___ structural protein with endolysin domain ; tail protein ; major head protein ; terminase large subunit ; N4-like RNA polymerase ___ RNA polymerase ; tail protein ; head-tail adaptor ___ head-tail connector protein	30791	47631		30.8	47.7		29	65
Duplodnaviria	4	Autographiviridae	2	0	10,4 - 47,8	15 - 69	99	18	-	-	-	-		exonuclease ; RNA polymerase	10313	47741		10.4	47.8		15	69
Duplodnaviria	5	Kyanoviridae + Ackermanviridae	32	0	144,4 - 252,5	178 - 324	76	17	+	+	+	+		ribonucleoside diphosphate reductase small subunit ___ ribonucleotide reductase class Ia beta subunit ; baseplate hub ; tail protein ; DNA helicase ; DnaB-like replicative helicase ___ DnaC-like helicase loader ; tail completion ___ tail tube protein ; terminase large subunit ; DNA primase ; NrdA-like aerobic NDP reductase large subunit ___ ribonucleoside-diphosphate reductase large subunit ___ r…	144311	252401		144.4	252.5		178	324
Duplodnaviria	6	Herelleviridae	25	3	106,1 - 167,5	126 - 294	65	14	+	+	+	+		DNA polymerase ; DnaB-like replicative helicase ___ terminase large subunit ; DNA primase ___ DNA primase/helicase ; SbcC-like subunit of palindrome specific endonuclease ___ SbcD-like subunit of palindrome specific endonuclease ; baseplate protein ; exonuclease ___ SbcC-like subunit of palindrome specific endonuclease ; RusA-like Holliday junction resolvase ; tail assembly chaperone ; endolysin …	106071	167431		106.1	167.5		126	294
Duplodnaviria	8	Zobellviridae	10	3	38,9 - 49,7	55 - 82	11	16	+	+	-	+		DNA polymerase ___ DNA polymerase exonuclease subunit ___ DNA polymerase I ; major head protein ; tail sheath ; tail appendage ; tail protein ; terminase large subunit ; head-tail adaptor	38889	49675		38.9	49.7		55	82
Duplodnaviria	9	Salamasviridae + Rountreeviridae + Guelinviridae	5	0	16,7 - 29	19 - 51	44	13	+	+	-	+		DNA polymerase ; tail protein ; terminase ; major head protein ; upper collar connector	16687	28950		16.7	29		19	51
Duplodnaviria	10	Drexlerviridae	23	5	44,3 - 51,9	62 - 87	40	47	+	+	-	-		endolysin ; DNA helicase ; neck protein Ne1 ; single strand DNA binding protein ; terminase large subunit ; tail completion Tc1 ; Rz-like spanin ; major head protein ; tail length tape measure protein ; tail fiber protein ___ tail protein ___ tail protein and host specificity ; terminase small subunit ; major tail protein ; tail length tape measure protein ; tail length tape measure protein ; min…	44219	51894		44.3	51.9		62	87
Duplodnaviria	11	Straboviridae	34	3	121,5 - 248,1	191 - 421	73	19	-	-	-	+		tail fiber chaperone ; deoxynucleoside monophosphate kinase ; ribonucleoside-diphosphate reductase large subunit ___ ribonucleoside diphosphate reductase small subunit ___ thioredoxin domain ; exonuclease ; baseplate hub subunit and tail lysozyme ___ endolysin ; DnaB-like replicative helicase ; thymidylate synthase ; head vertex assembly chaperone ; SbcD-like subunit of palindrome specific endonu…	121442	248088		121.5	248.1		191	421
Duplodnaviria	12	Steigviridae	12	4	93,6 - 104,6	65 - 119	16	14	+	+	+	-		Sak4-like ssDNA annealing protein ; virion structural protein ; exonuclease VIII ; terminase large subunit ; major head protein ; virion structural protein ; portal protein ; virion structural protein	93564	104564		93.6	104.6		65	119
Duplodnaviria	15	Casjensviridae	17	1	54,5 - 64	62 - 88	35	26	+	+	+	-		DNA helicase ; DNA helicase ___ DNA primase ; Gp2.5-like ssDNA binding protein and ssDNA annealing protein ; tail length tape measure protein ___ tail protein ; major tail protein with Ig-like domain ; head maturation protease ; tail protein ; tail assembly protein ; tail length tape measure protein ; neck protein Ne1 ; major head protein ; portal protein ; terminase large subunit ; terminase sma…	54417	63971		54.5	64		62	88
Duplodnaviria	16	Mesyanzhinovviridae	13	0	56,6 - 64,1	77 - 93	12	22	-	+	+	+		DNA polymerase ; thymidylate synthase ; dCMP deaminase ; neck protein Ne1 ; ribonucleoside-diphosphate reductase large subunit ___ ribonucleotide reductase ; DNA helicase ; DNA primase ; DNA helicase ; terminase small subunit ; portal protein ; terminase large subunit ; head morphogenesis ___ virion structural protein ; head-tail adaptor Ad1	56537	64096		56.6	64.1		77	93
Duplodnaviria	17	Demerecviridae	31	0	104,4 - 128,7	137 - 192	23	26	+	-	+	+		DNA polymerase ; exonuclease ; dUTPase ; aerobic NDP reductase small subunit ___ ribonucleoside diphosphate reductase small subunit ___ ribonucleotide reductase ; polynucleotide kinase ; DNA helicase ; DnaB-like replicative helicase ; NinI-like serine-threonine phosphatase ; DNA primase ; NrdA-like aerobic NDP reductase large subunit ___ ribonucleoside-diphosphate reductase large subunit ___ ribo…	104329	128602		104.4	128.7		137	192
Duplodnaviria	18	Vilmaviridae	25	0	70,2 - 84,4	113 - 151	17	22	+	+	+	+		DnaB-like replicative helicase ; major head protein ; single strand DNA binding protein ; minor tail protein ; DNA polymerase exonuclease subunit ; terminase small subunit ; terminase large subunit ; portal protein ; head maturation protease ; head scaffolding protein ; head-tail adaptor ___ head-tail connector protein ; head-tail connector protein ___ neck protein ; tail completion Tc1 ; major t…	70183	84303		70.2	84.4		113	151
Duplodnaviria	19	Zierdtviridae	23	1	64,2 - 70,6	86 - 94	20	25	+	+	+	+		endolysin ; Sak4-like ssDNA annealing protein ; DNA helicase ; portal protein ; major tail protein ; minor tail protein ; head decoration ; head-tail connector protein ; head-tail adaptor Ad1 ; head closure Hc1 ; tail completion Tc1 ; tail assembly chaperone ; minor tail protein ; tail length tape measure protein ; minor tail protein ; terminase large subunit ; head maturation protease ; major he…	64105	70579		64.2	70.6		86	94
Duplodnaviria	20	Schitoviridae	13	1	59,1 - 104	71 - 127	70	13	+	+	+	+		DNA polymerase ; virion structural protein ; virion structural protein ; terminase large subunit ; single strand DNA binding protein ; HNH endonuclease ; ATPase ; DNA primase ; virion RNA polymerase ; major head protein ; tail length tape measure protein ; portal protein	59080	103910		59.1	104		71	127
Duplodnaviria	21	Chaseviridae	27	4	44,7 - 56,7	62 - 82	14	39	+	+	+	+		ATP-dependent DNA ligase ; DNA polymerase ; exonuclease ; baseplate protein ; virion structural protein ; HNH endonuclease ; terminase large subunit ; DNA primase/helicase ; virion structural protein ; deoxynucleoside monophosphate kinase ; portal protein ; head maturation protease ; major head protein ; virion structural protein ; tail fiber protein ; virion structural protein ; head protein ; t…	44651	56621		44.7	56.7		62	82
Duplodnaviria	22	Kwiatkowskiviridae	156	92	146,4 - 149,9	243 - 274	6	69	+	+	-	+		thioredoxin domain ; ATP-dependent DNA ligase ; nucleotide-sugar epimerase ; DNA polymerase I ; exonuclease ; ribonucleoside diphosphate reductase small subunit ; tail fiber assembly protein ; PhoH-like phosphate starvation-inducible ; DNA methyltransferase ; NinI-like serine-threonine phosphatase ; ribonucleotide reductase NrdA-like ; exonuclease recombination-associated ; ribonucleoside-diphosp…	146307	149813		146.4	149.9		243	274
Duplodnaviria	23	Aggregaviridae + Assiduviridae	6	4	43,2 - 57,5	80 - 110	4	12	-	-	-	-		single strand DNA binding protein ; NinG/ Rap DNA junction specific endonuclease	43175	57447		43.2	57.5		80	110
Duplodnaviria	24	Pachyviridae	12	3	71,5 - 78,9	105 - 119	5	12	-	+	+	-		transcriptional regulator ___ transcriptional repressor ; single strand DNA binding protein ; terminase large subunit ; virion structural protein ; virion structural protein ; virion structural protein ; virion structural protein ; portal protein ; virion structural protein	71443	78833		71.5	78.9		105	119
Duplodnaviria	25	Pervagoviridae	80	56	72,6 - 73	84 - 86	2	99	-	+	+	+		DNA polymerase ; endolysin ; NinI-like serine-threonine phosphatase ; Holliday junction resolvase ; terminase large subunit ; DNA invertase ; DNA polymerase exonuclease subunit ; tRNA splicing ligase ; virion structural protein ; virion structural protein ; virion structural protein ; virion structural protein ; 3'-5' exonuclease ; portal protein ; virion structural protein ; exonuclease ; chaper…	72534	72979		72.6	73		84	86
Duplodnaviria	27	Duneviridae + Helgolandviridae	5	3	37,6 - 46,6	48 - 63	6	12	-	-	-	-		head maturation protease ; transcriptional regulator	37547	46575		37.6	46.6		48	63
Duplodnaviria	30	Crevaviridae + Intestiviridae	23	10	83,5 - 98,1	77 - 95	20	27	+	+	+	+		ATP-dependent DNA ligase ; virion structural protein ; terminase large subunit ; major head protein ; virion structural protein ; DNA helicase ; exonuclease ; portal protein ; DNA primase ; minor head protein ; virion structural protein ; DNA polymerase ; Dda-like helicase	83412	98001		83.5	98.1		77	95
Duplodnaviria	31	Orlajensenviridae	24	4	17,4 - 17,5	24 - 24	3	100	+	+	+	-		transcriptional regulator ___ transcriptional repressor ; Lsr2-like DNA bridging protein ; HNH endonuclease ; terminase large subunit ; transcriptional regulator ; portal protein ; major head protein ; head-tail connector protein ; minor tail protein ; major tail protein ; neck protein Ne1 ; tail assembly chaperone ; tail length tape measure protein ; minor tail protein ; minor tail protein ; tai…	17385	17442		17.4	17.5		24	24
Duplodnaviria	33	Winoviridae	10	8	34,8 - 39,7	49 - 62	3	18	-	-	-	-		tail sheath ; tail protein	34711	39649		34.8	39.7		49	62
Duplodnaviria	34	Molycolviridae	183	149	124,2 - 124,7	193 - 200	2	95	+	-	+	+		ATP-dependent DNA ligase ; nucleotide-sugar epimerase ; DNA polymerase ; exonuclease ; nucleotide pyrophosphohydrolase ; ribonucleoside diphosphate reductase small subunit ; DNA helicase ; endolysin ; DnaB-like replicative helicase ; DNA primase ; thymidylate synthase ; protease ; ribonucleoside-diphosphate reductase large subunit ; UvsX-like recombinase ; SbcD-like subunit of palindrome specific…	124169	124695		124.2	124.7		193	200
Duplodnaviria	35	Forsetiviridae	55	37	44 - 47,2	66 - 76	2	77	+	+	+	-		integrase ; nucleotide pyrophosphohydrolase ; terminase large subunit ; tail length tape measure protein ; single strand DNA binding protein ; HNH endonuclease ; portal protein ; virion structural protein ; metal-dependent hydrolase ; DnaD-like helicase loader ; major head protein ; virion structural protein ; tail fiber protein ___ tail protein ; NinB/ Orf homologous recombination mediator ; rep…	43978	47186		44	47.2		66	76
Duplodnaviria	36	Suoliviridae	20	10	92,6 - 104,1	94 - 172	30	19	+	-	+	+		RNA polymerase sigma factor ; DnaB-like replicative helicase ; Sak4-like ssDNA annealing protein ; exonuclease VIII ; anaerobic ribonucleoside reductase large subunit ___ terminase large subunit ; major head protein ; Dda-like helicase ___ virion structural protein ; portal protein ; DNA primase ; DNA polymerase	92600	104085		92.6	104.1		94	172
Varidnaviria	2	Matshushitaviridae	28	23	17,1 - 19,7	35 - 40	2	75	-	+	-	-		terminase large subunit ; tail fiber protein ___ virion structural protein ; virion structural protein ; virion structural protein ; transglycosylase	17036	19604		17.1	19.7		35	40
Varidnaviria	7	Corticoviridae + Autolykiviridae	3	0	10,1 - 10,7	16 - 21	7	15	+	+	-	-		terminase large subunit ; major head protein ; endolysin	10046	10636		10.1	10.7		16	21
Varidnaviria	13	Simuloviridae	12	11	16,4 - 19	29 - 31	3	47	-	+	-	-		terminase large subunit	16341	18925		16.4	19		29	31
Varidnaviria	14	Tectiviridae	3	0	14,4 - 16,6	22 - 30	6	11	-	+	-	+		terminase large subunit ; DNA polymerase ; minor head protein	14398	16523		14.4	16.6		22	30
Varidnaviria	28	Tectiviridae	8	3	17,3 - 18,3	30 - 34	3	27	-	+	-	+		terminase large subunit ; DNA polymerase ; membrane DNA delivery ; tail length tape measure protein ___ virion structural protein ; minor head protein	17253	18266		17.3	18.3		30	34
